# Supplementary material for: Neuron-glia interaction through Serotonin-BDNF-NGFR axis enables regenerative neurogenesis in Alzheimer’s model of adult zebrafish brain
Source: PubMed Central journal article supplement (PMC6964913; doi:10.1371/journal.pbio.3000585), 2020-01-06

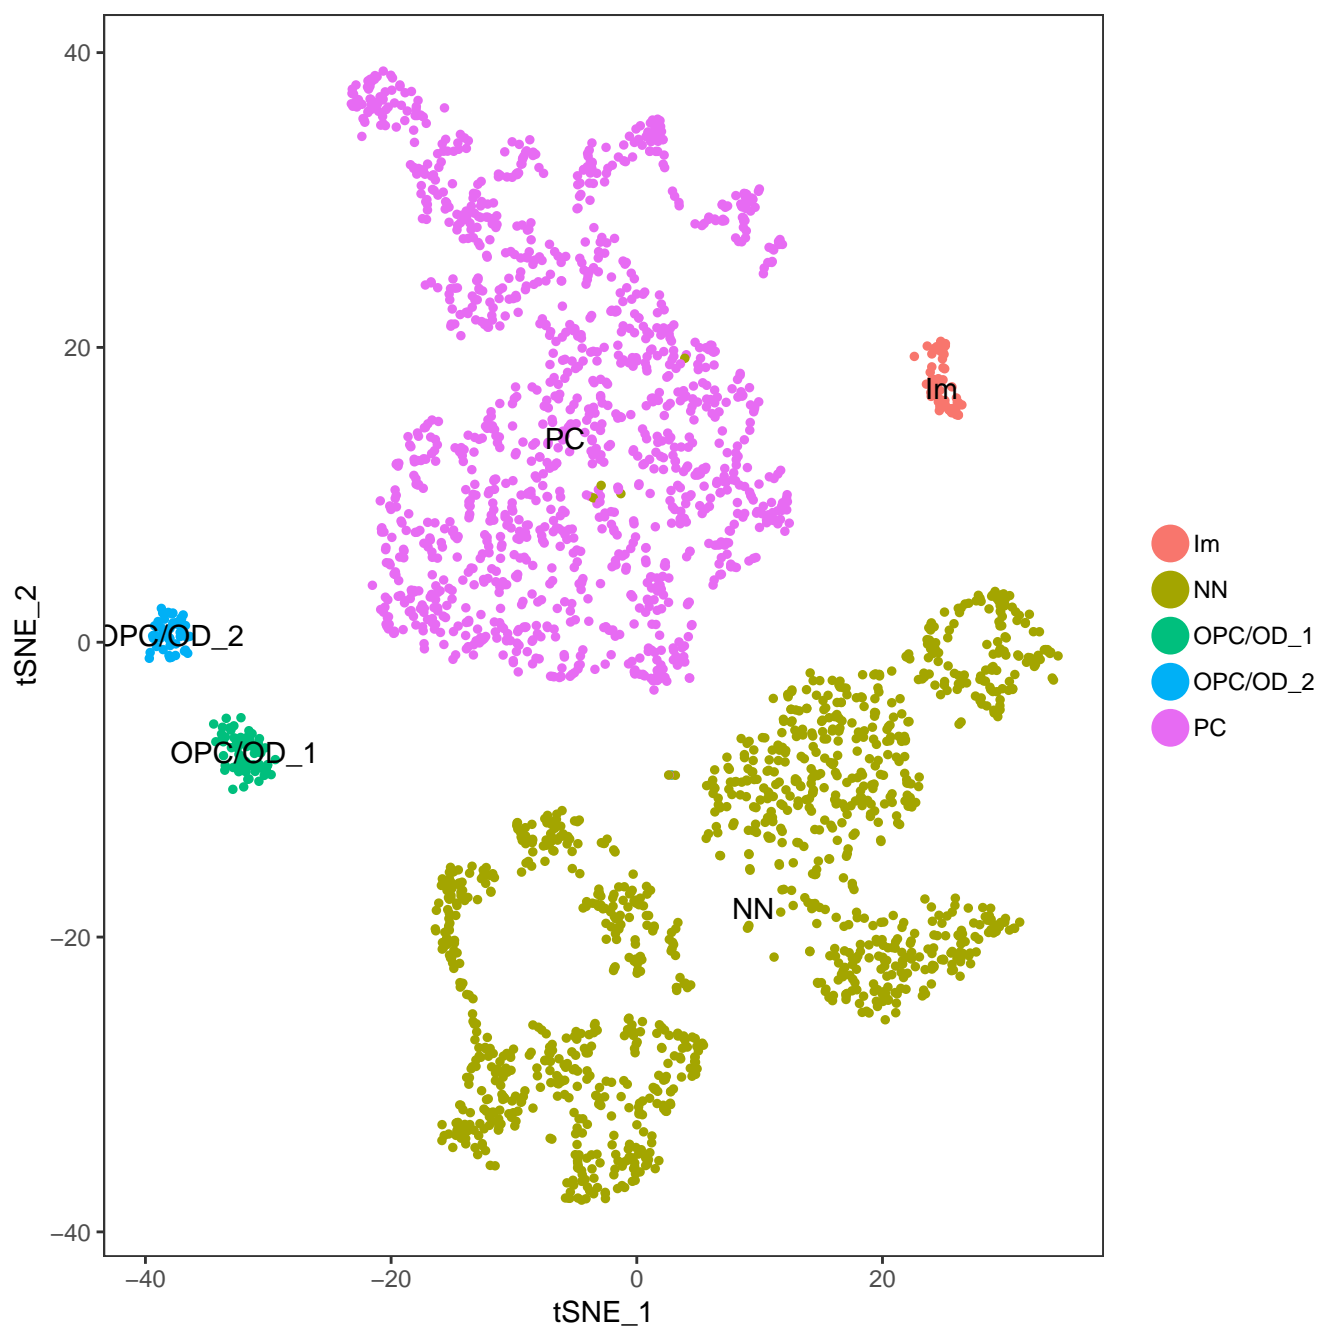

**nGene**

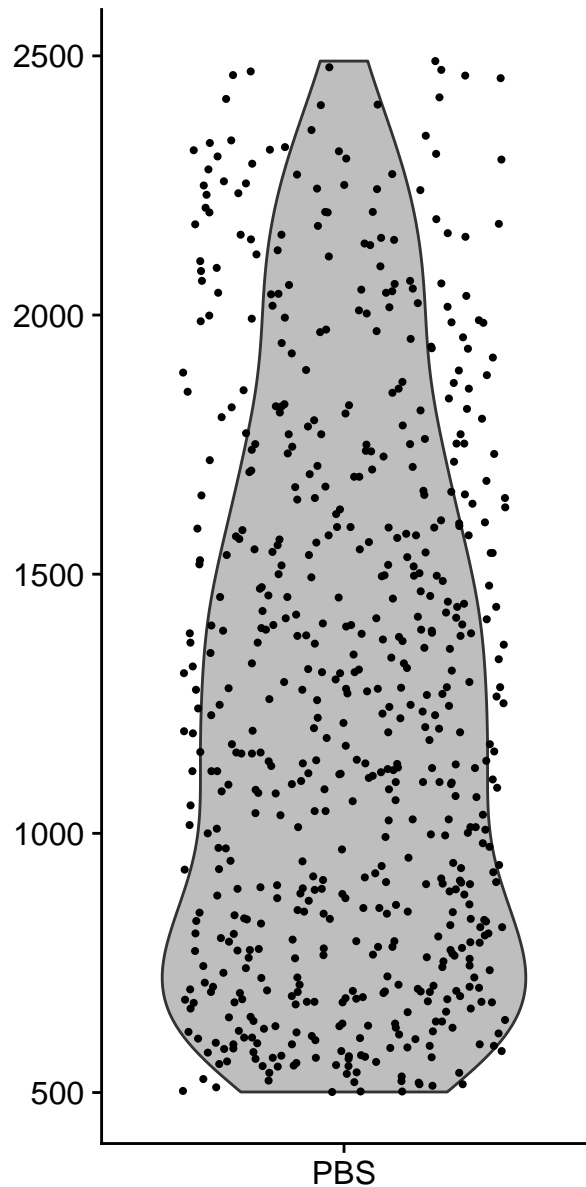

**Identity**

**nUMI**

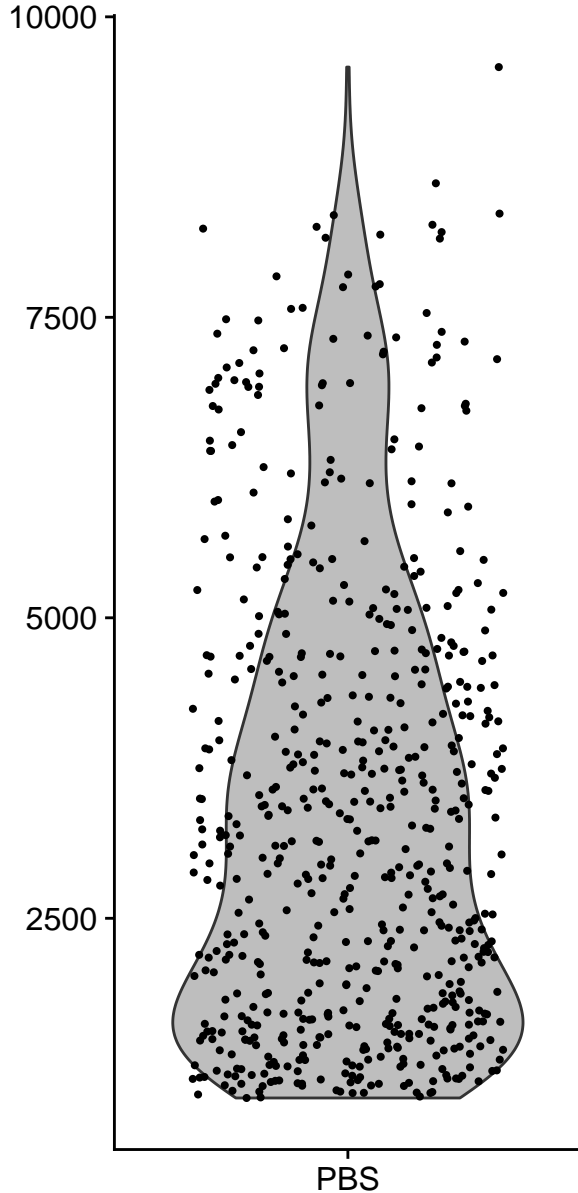

**Identity**

**percent.mito**

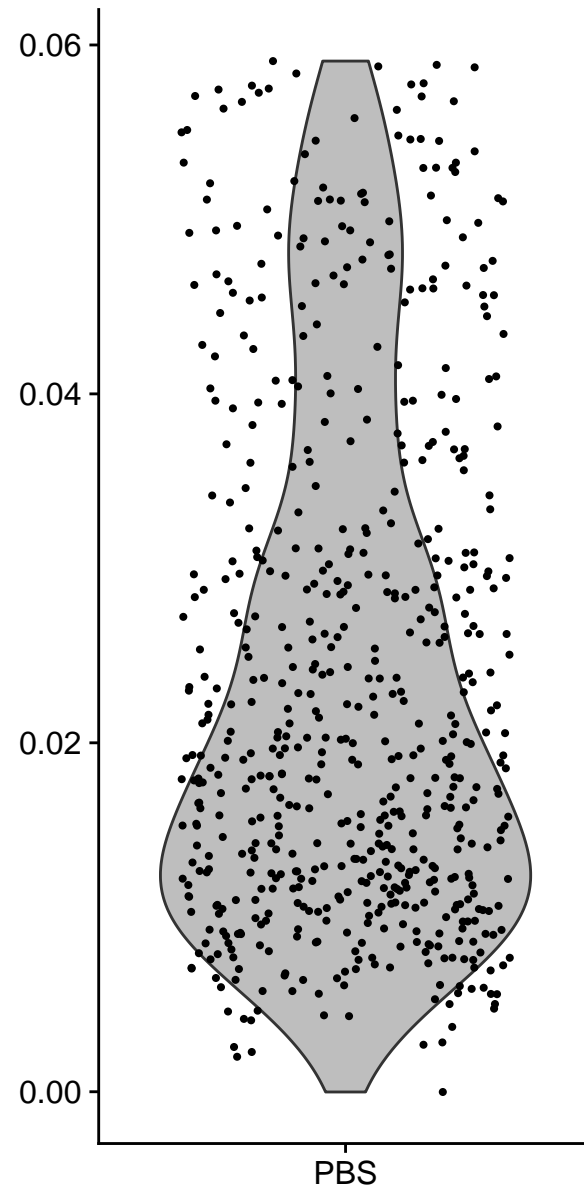

**Identity**

**percent.gfp**

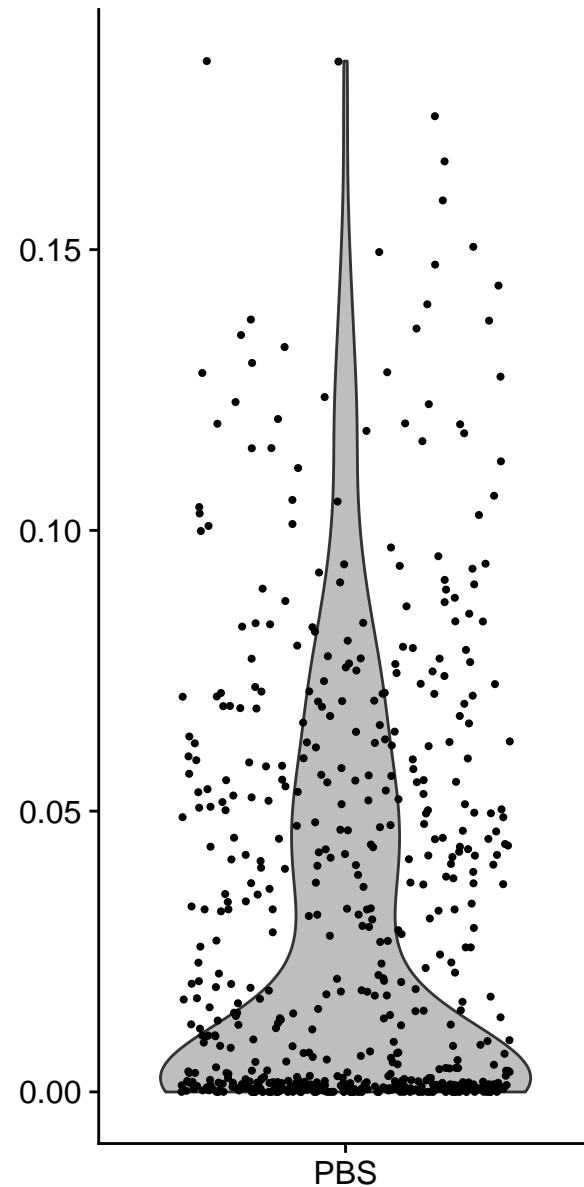

**Identity**

# CC2

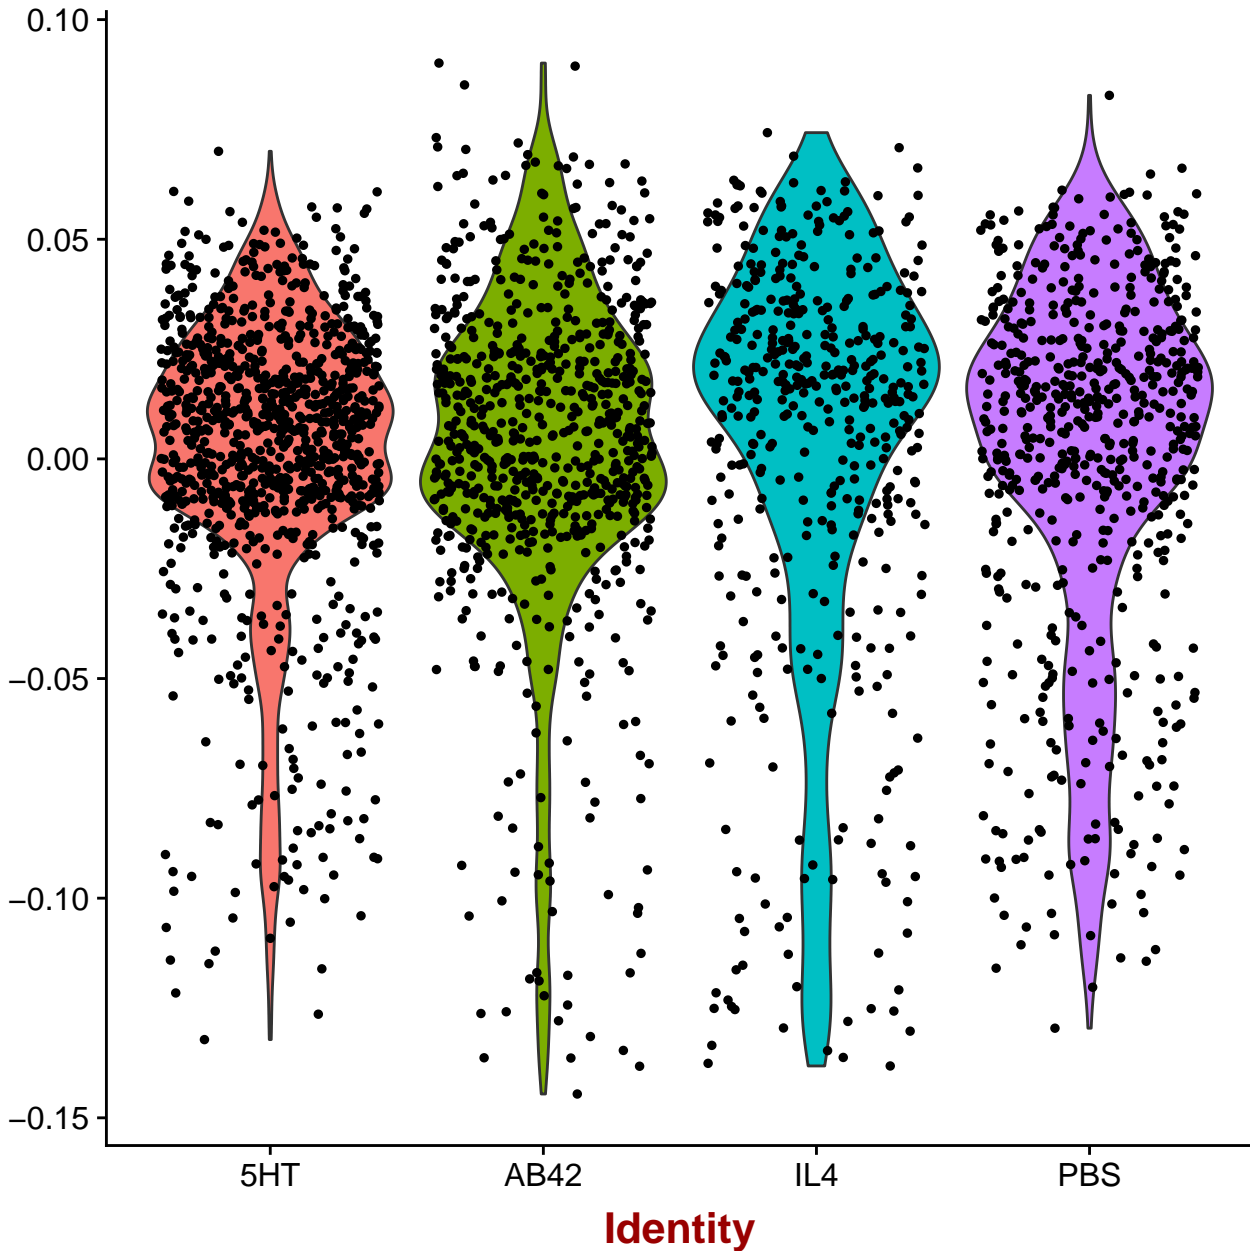

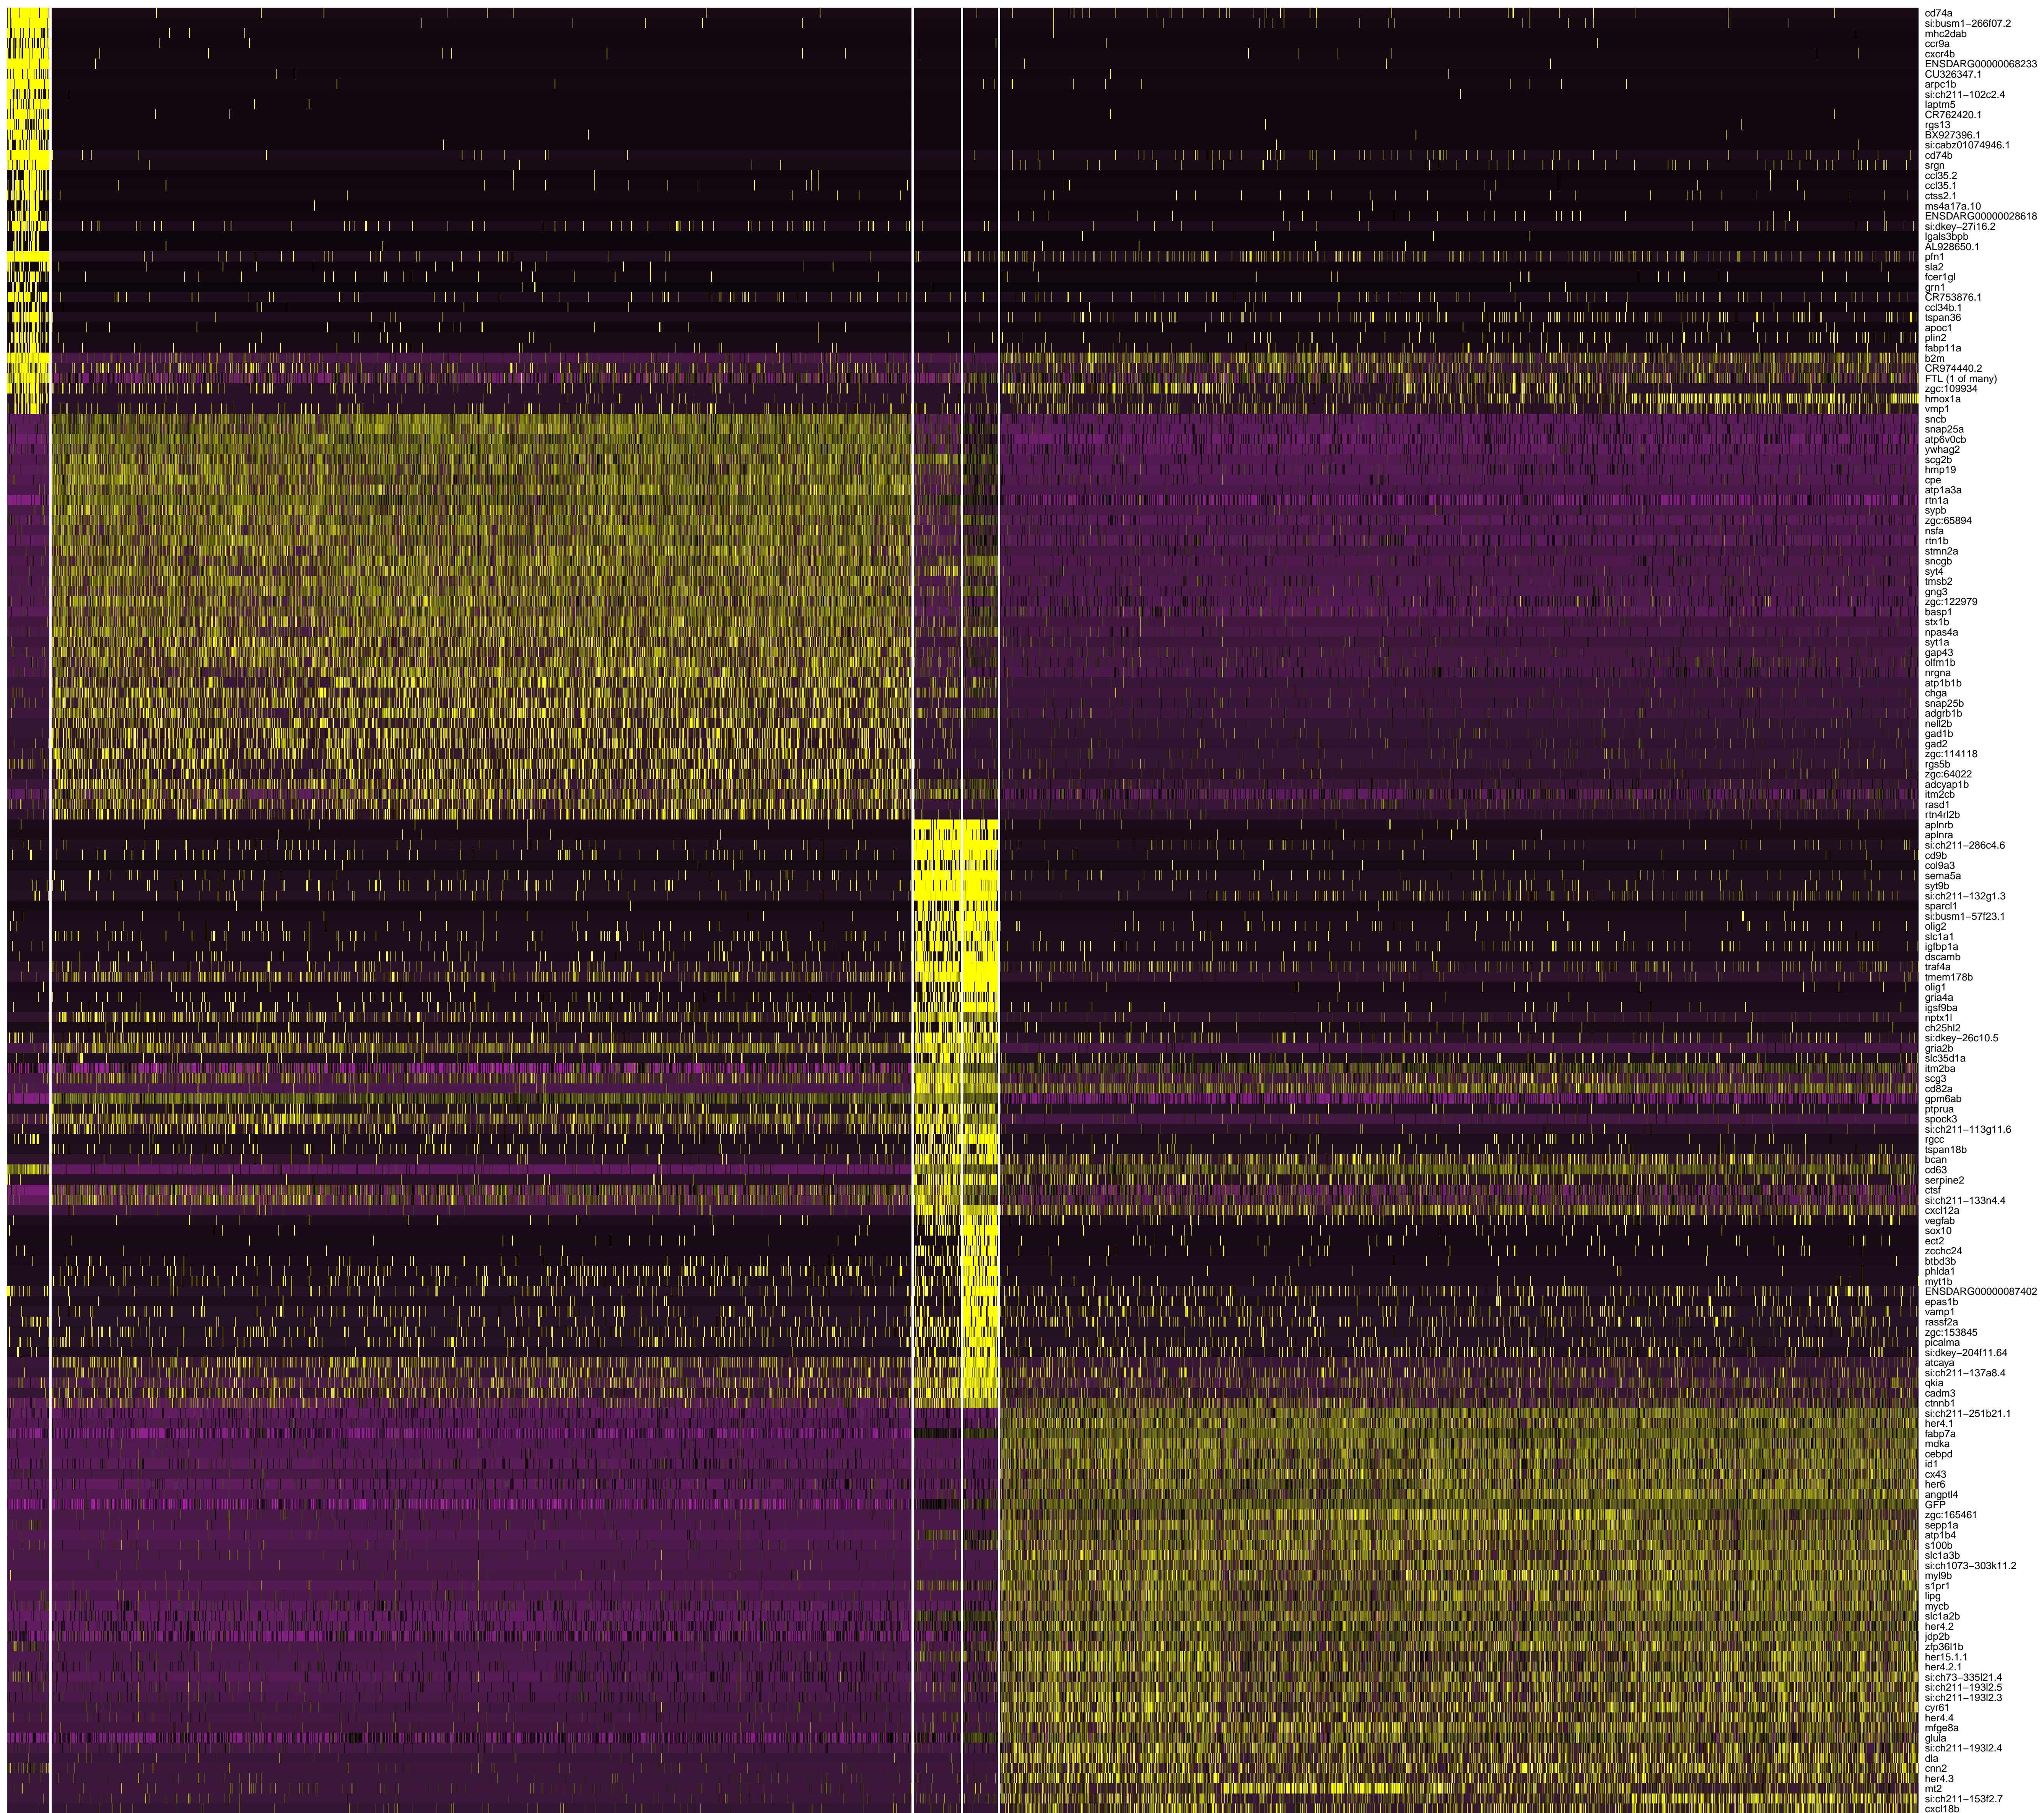

cd74a  
si:busm1-266f07.2  
mh2dab  
ccr9a  
cxcr4b  
ENSDARG00000068233  
CUS26347.1  
arpc1b  
si:ch211-102c2.4  
laptm5  
CR762420.1  
rgs13  
BX927396.1  
si:cabz01074946.1  
cd74b  
srgn  
ccl35.2  
ccl35.1  
ctss2.1  
ms4a17a.10  
ENSDARG00000028618  
si:dkey-2716.2  
lgals3bpb  
AL928650.1  
pfn1  
slc2  
fcer1g  
grn1  
CR753876.1  
ccl34b.1  
tspan36  
apoc1  
plin2  
fabp11a  
b2m  
CR74440.2  
FTL (1 of many)  
zgc:109934  
hmox1a  
vmp1  
snca  
snap25a  
atp6v0cb  
ywhag2  
scg2b  
hmp19  
cpe  
atp1a3a  
rtn1a  
sypb  
zgc:65894  
nrlf  
rtn1b  
stmn2a  
snca  
tmsb2  
gng3  
zgc:122979  
basp1  
slc1b  
npas4a  
sy11a  
gap43  
olfm1b  
nrgna  
atp1b1b  
chga  
snap25b  
adgrb1b  
nsl2b  
gad1b  
gad2  
zgc:114118  
rgs5b  
zgc:64022  
adcyap1b  
itm2cb  
rasd1  
rtn4r12b  
ap1nb  
aplnra  
cd9b  
col9a3  
sema5a  
sy15b  
si:ch211-132g1.3  
spard1  
si:busm1-57123.1  
olig2  
slc1a1  
igfbp1a  
dscamb  
traf4a  
tmem178b  
olig1  
gria4a  
igsf9ba  
nptx1  
ch25h2  
si:dkey-26c10.5  
gria2b  
slc35d1a  
itm2ba  
scg3  
cd82a  
gpm6ab  
p1prua  
spock3  
si:ch211-113g11.6  
rgcc  
tspan18b  
bcan  
cd63  
serpine2  
csl  
si:ch211-133n4.4  
vegfab  
sox10  
ecl2  
zcchc24  
btbd3b  
phlda1  
myl1b  
ENSDARG00000087402  
epas1b  
vamp1  
rassf2a  
zgc:153845  
picalma  
si:dkey-204f11.64  
atcaya  
si:ch211-137a8.4  
klc  
cadm3  
ctnnb1  
si:ch211-251b21.1  
her4.1  
fabp7a  
mdka  
cebpd  
id1  
cx43  
her5  
angptl4  
GFP  
zgc:165461  
sepp1a  
atp1b4  
s100b  
slc1a3b  
si:ch1073-303k11.2  
myl9b  
s1pr1  
lipg  
mycb  
slc1a2b  
her4.2  
jgap2b  
zfp361b  
her15.1.1  
her4.2.1  
si:ch73-335i21.4  
si:ch211-193i2.5  
si:ch211-193i2.3  
cyr61  
her4.4  
mtge8a  
glia3  
si:ch211-193i2.4  
dia  
crn2  
her4.3  
mt2  
si:ch211-153i2.7  
cxcl18b

Im

NN

OPC/OD\_1

OPC/OD\_2

PC

**nGene**

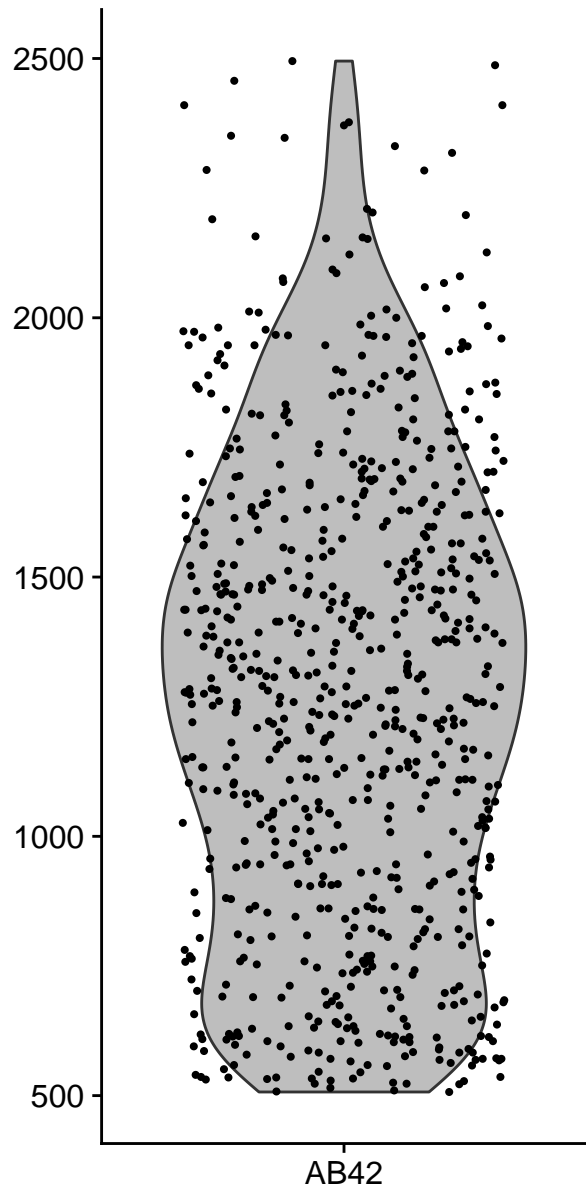

**Identity**

**nUMI**

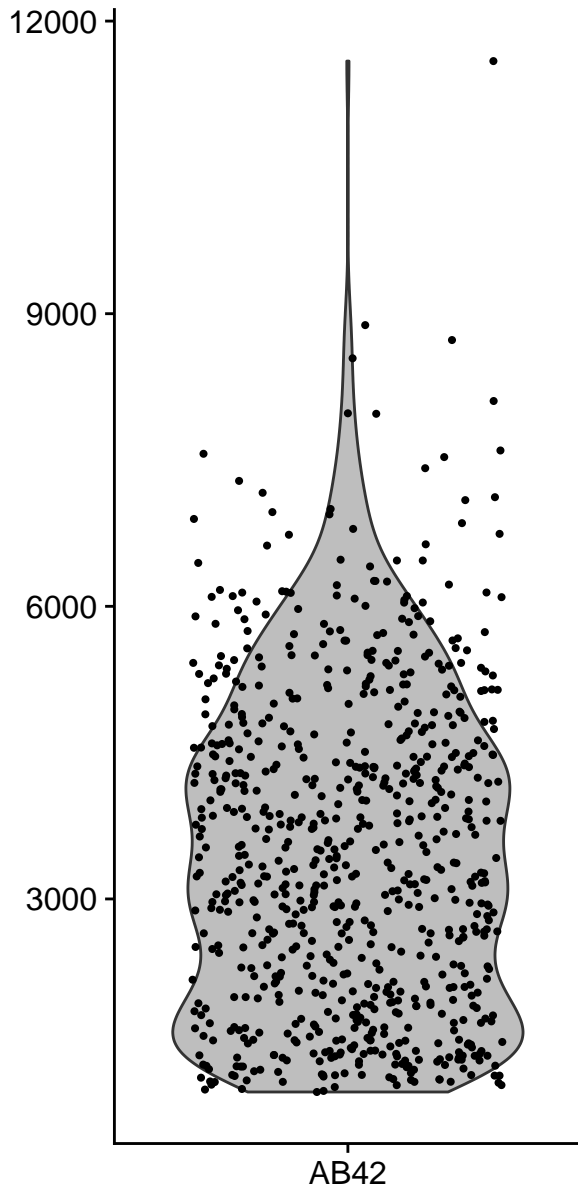

**Identity**

**percent.mito**

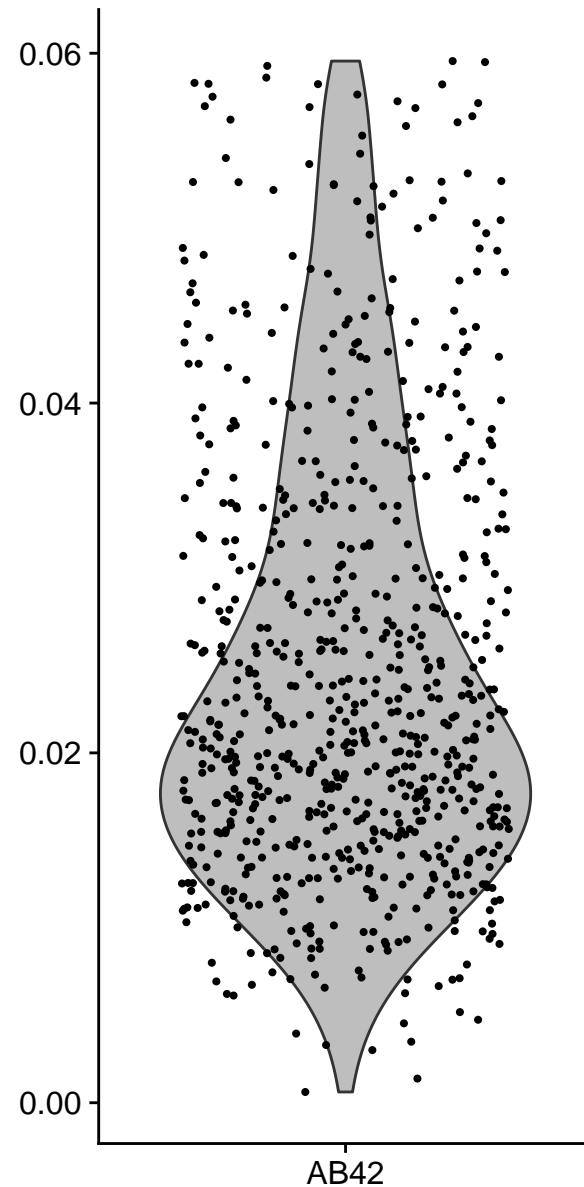

**Identity**

**percent.gfp**

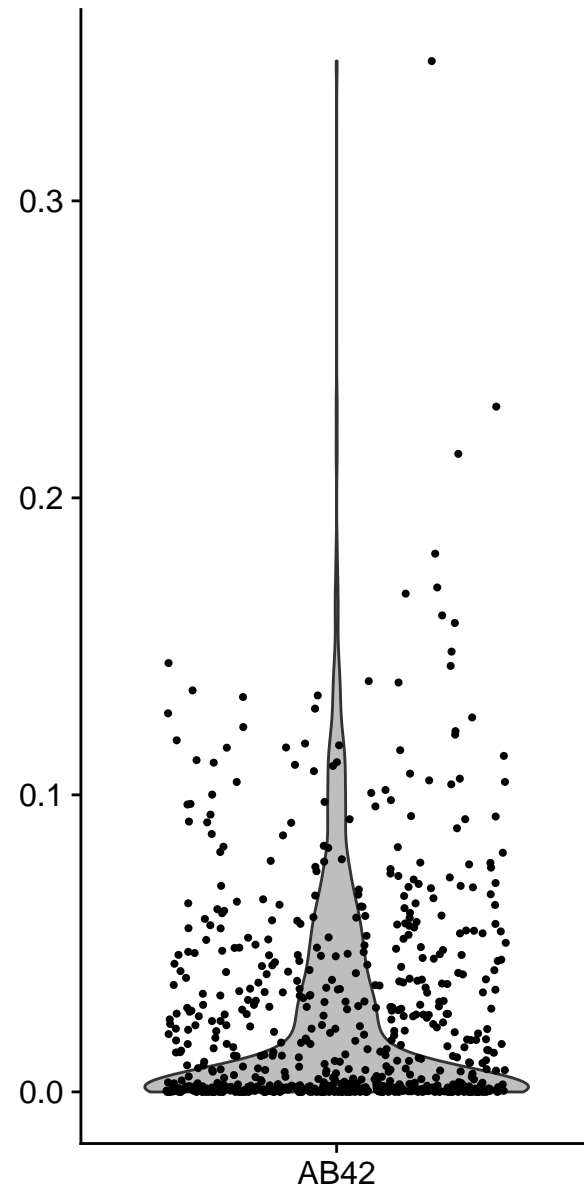

**Identity**

**nGene**

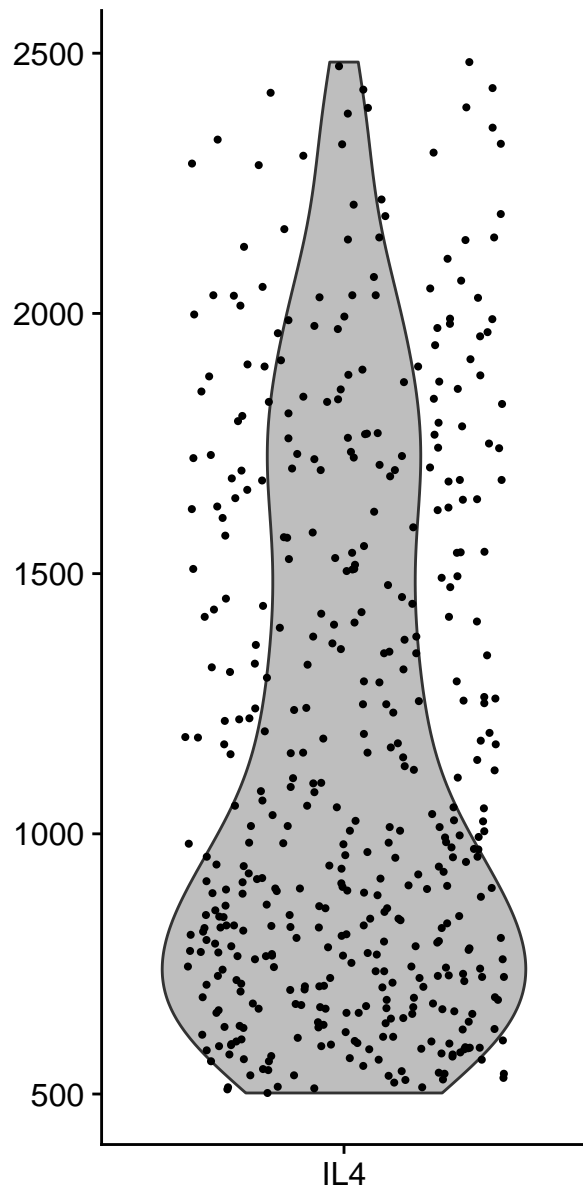

**Identity**

**nUMI**

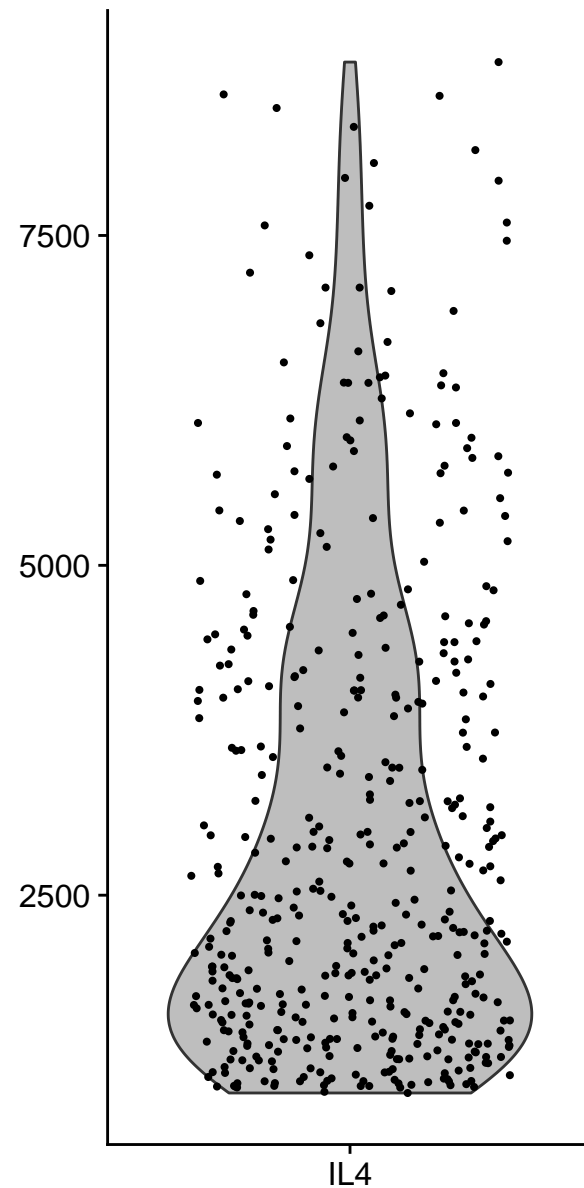

**Identity**

**percent.mito**

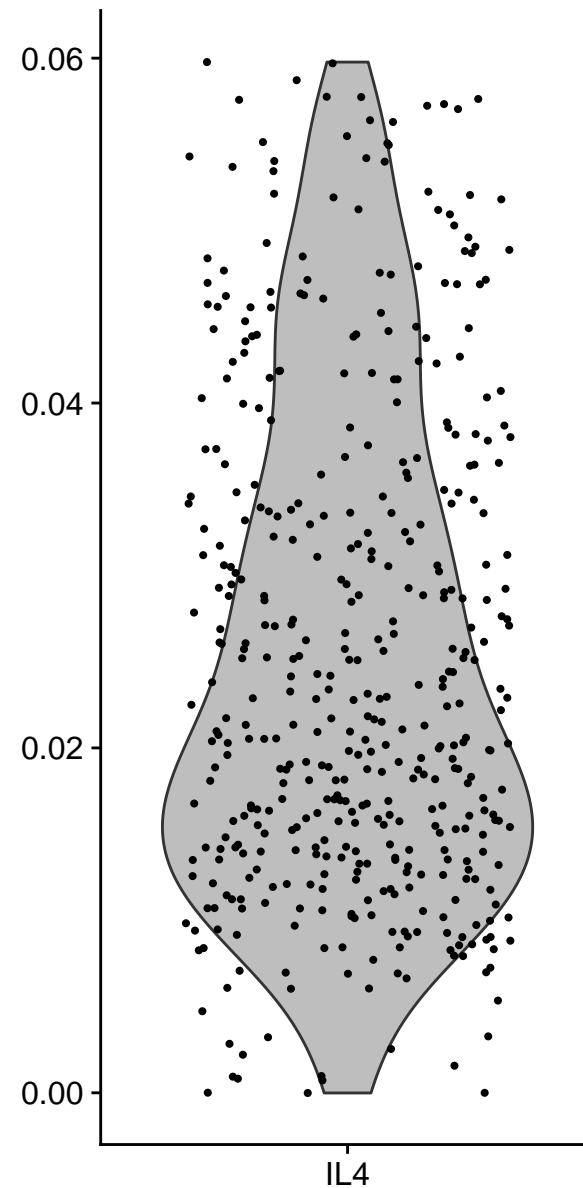

**Identity**

**percent.gfp**

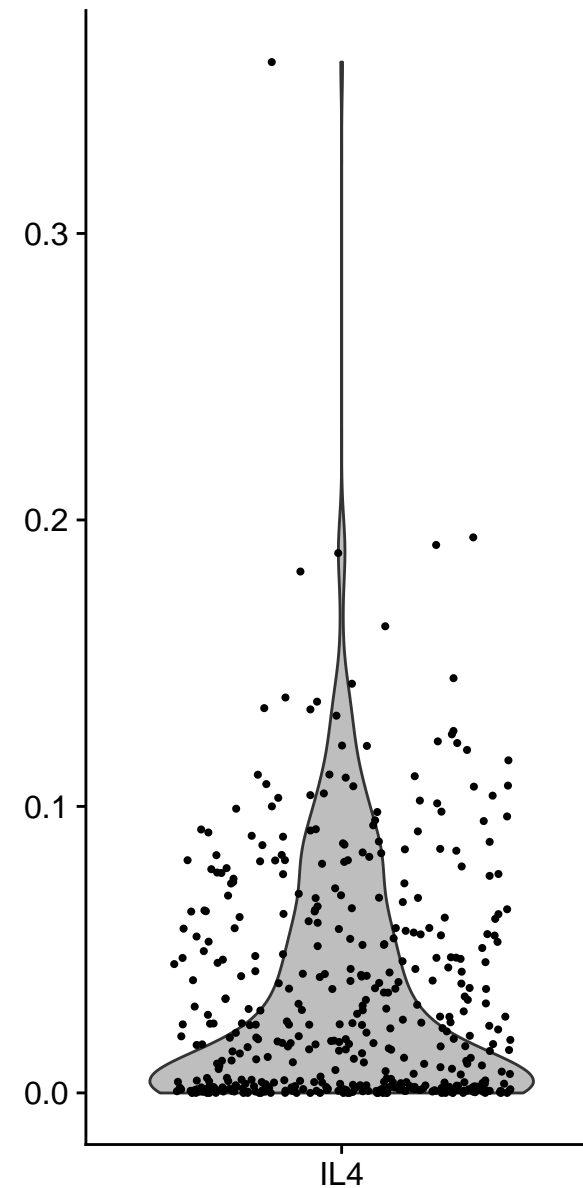

**Identity**

**nGene**

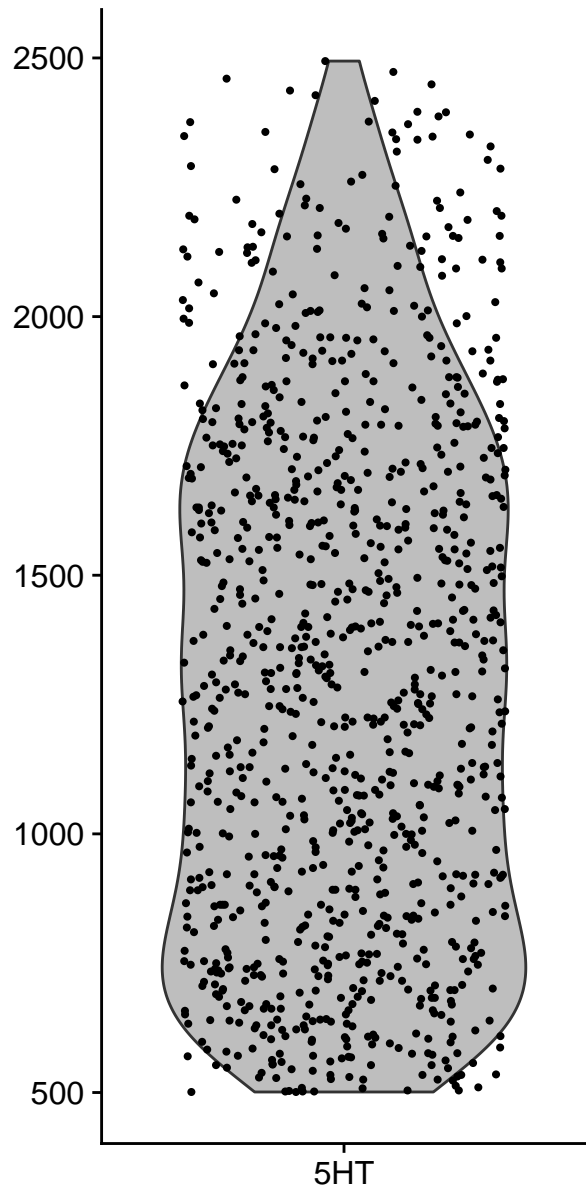

**Identity**

**nUMI**

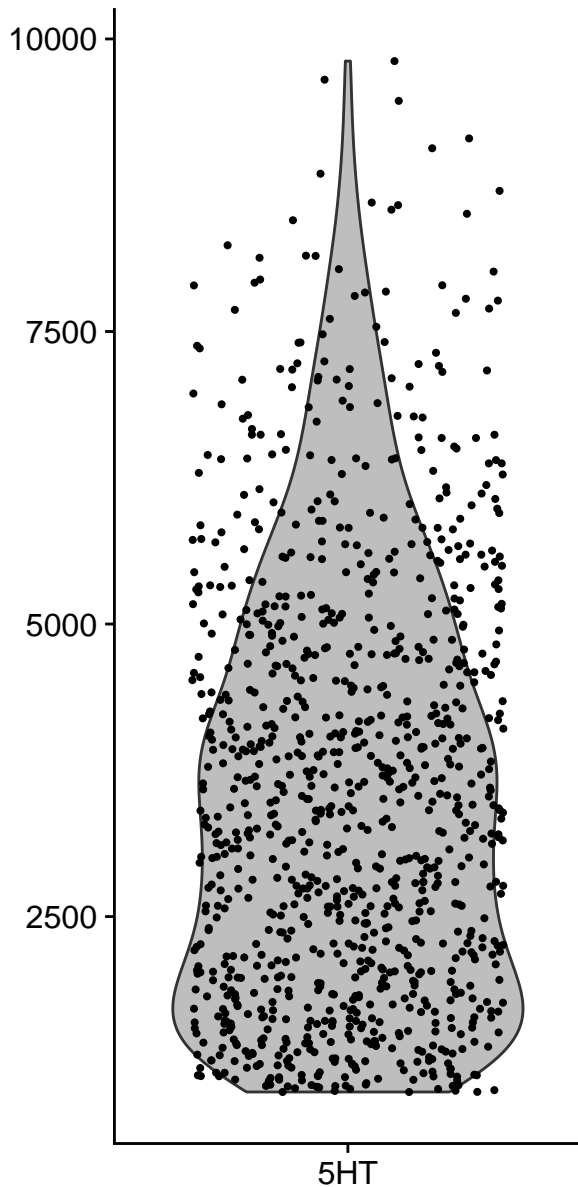

**Identity**

**percent.mito**

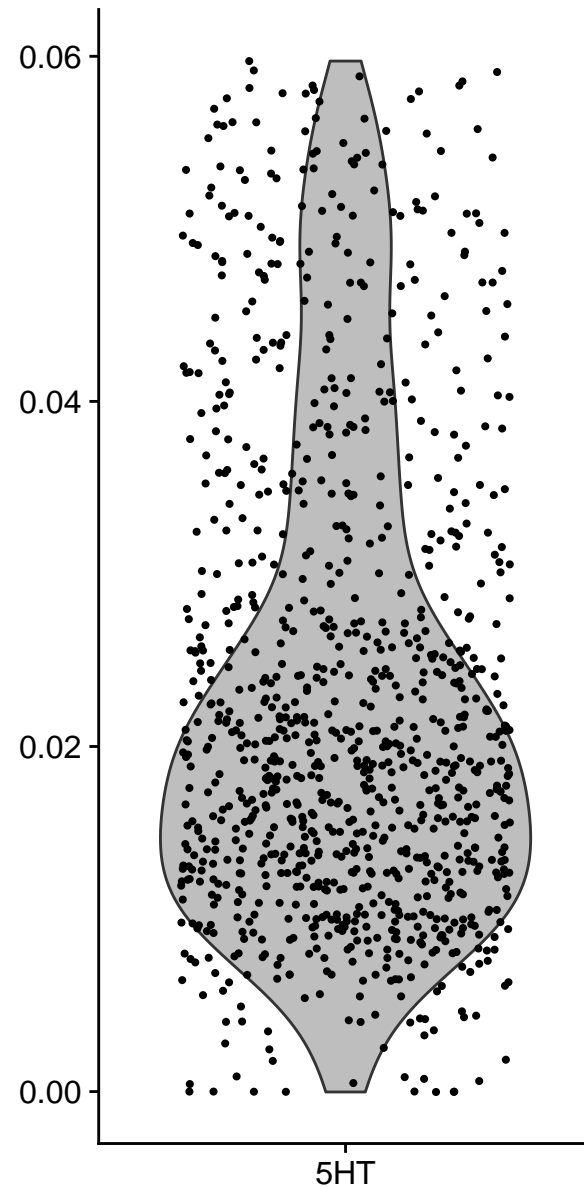

**Identity**

**percent.gfp**

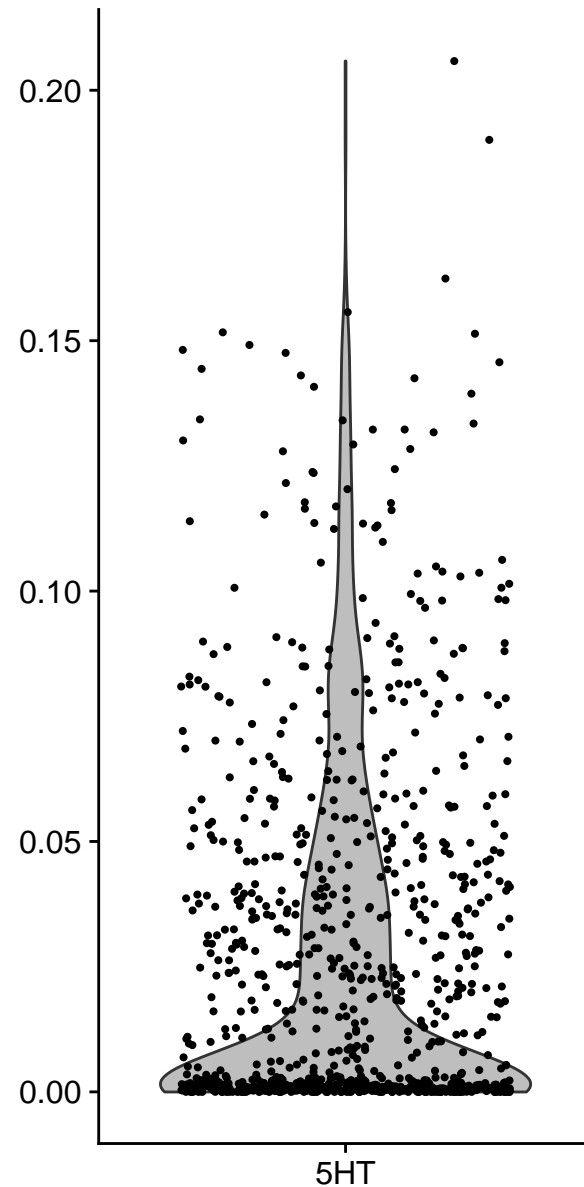

**Identity**

**PBS**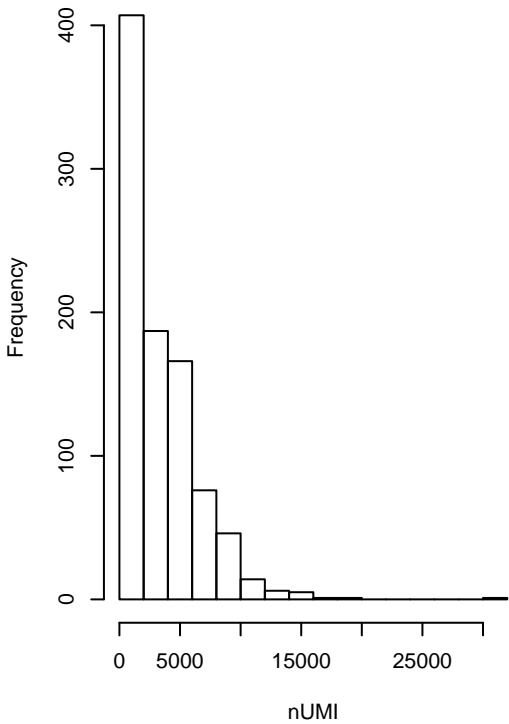**PBS**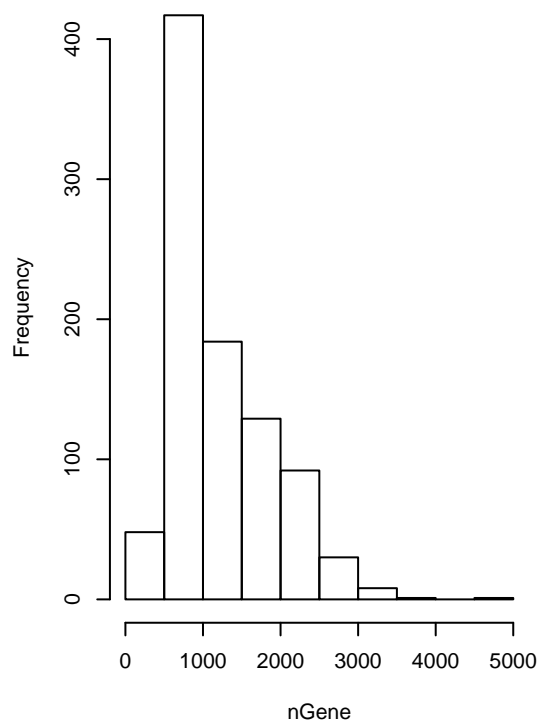**PBS**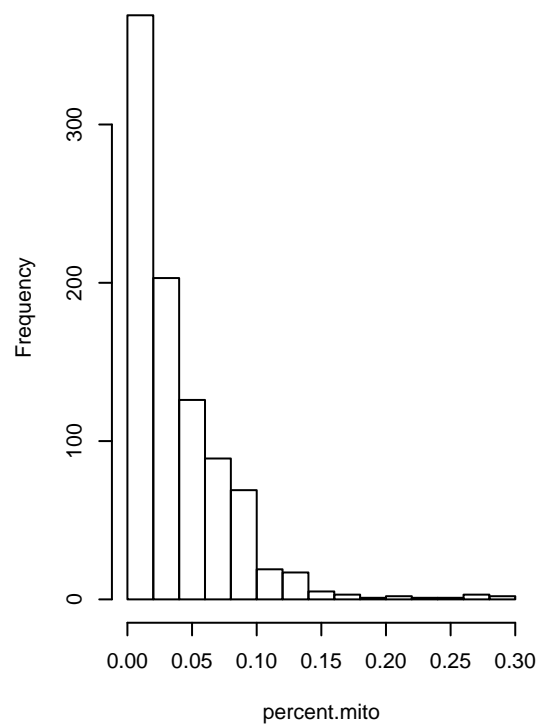**PBS**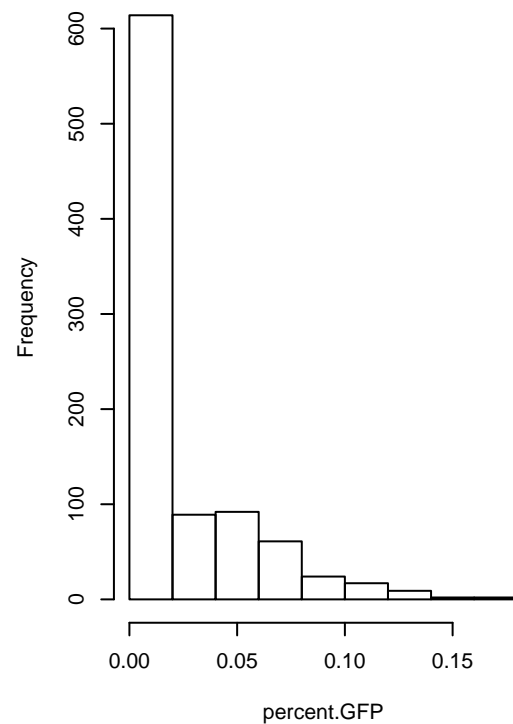



**AB42**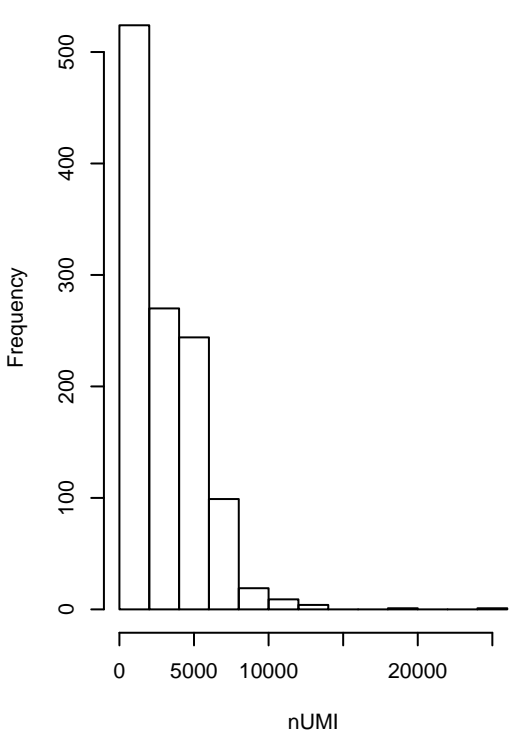**AB42**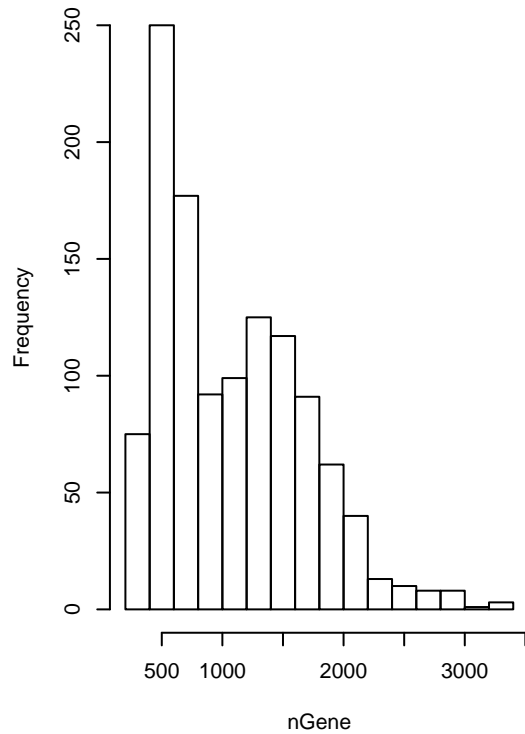**AB42**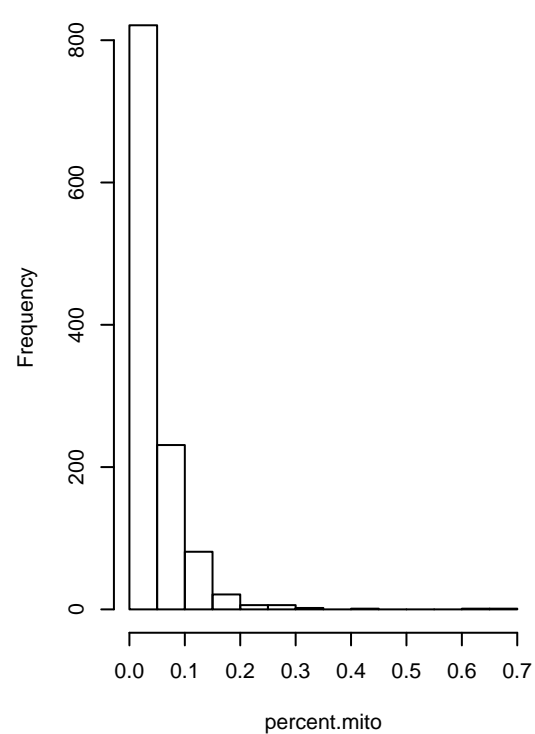**AB42**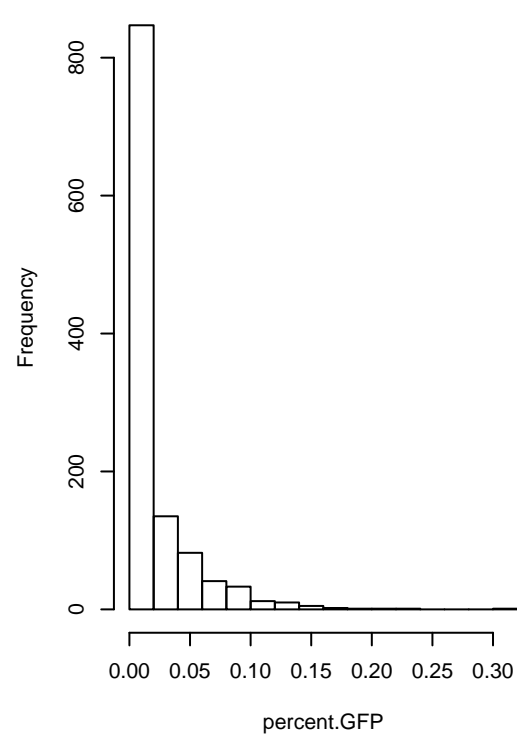

**IL4**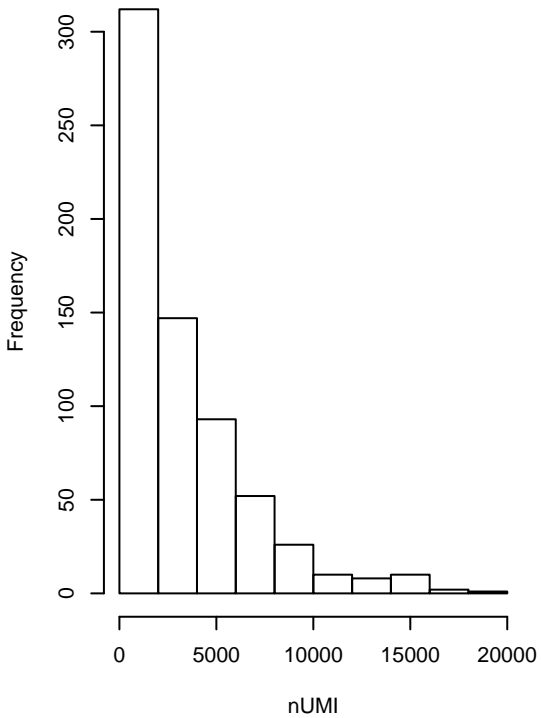**IL4**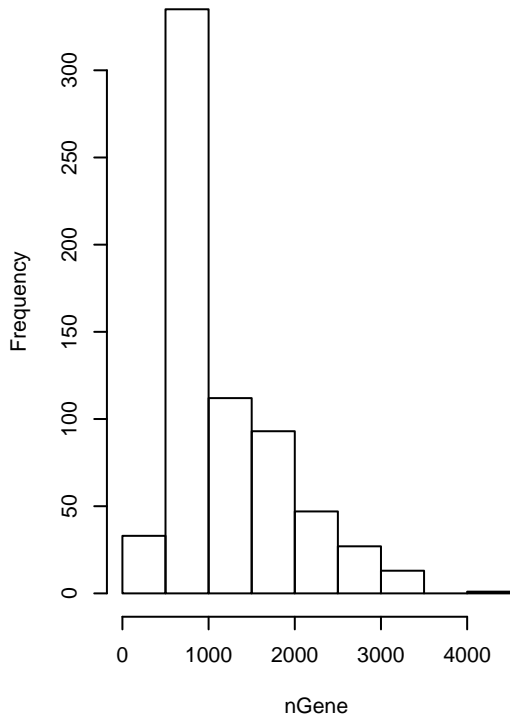**IL4**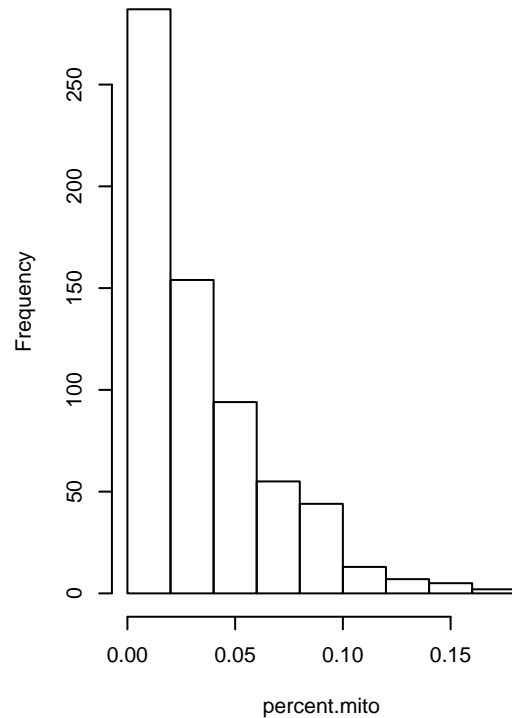**IL4**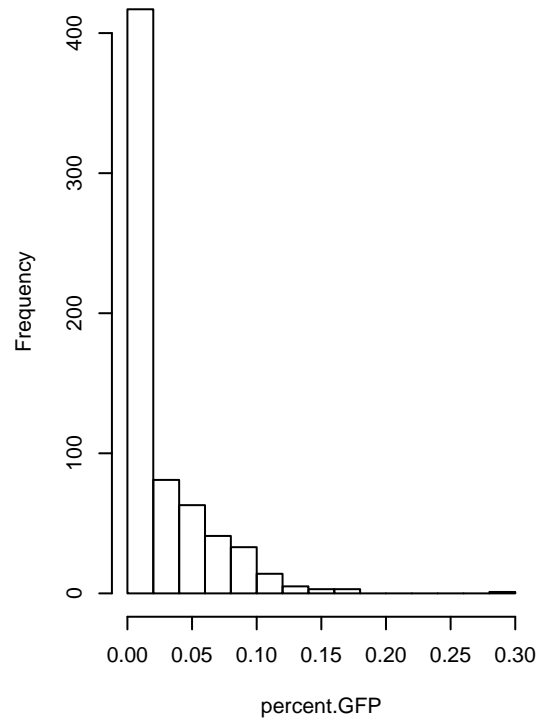

**5HT**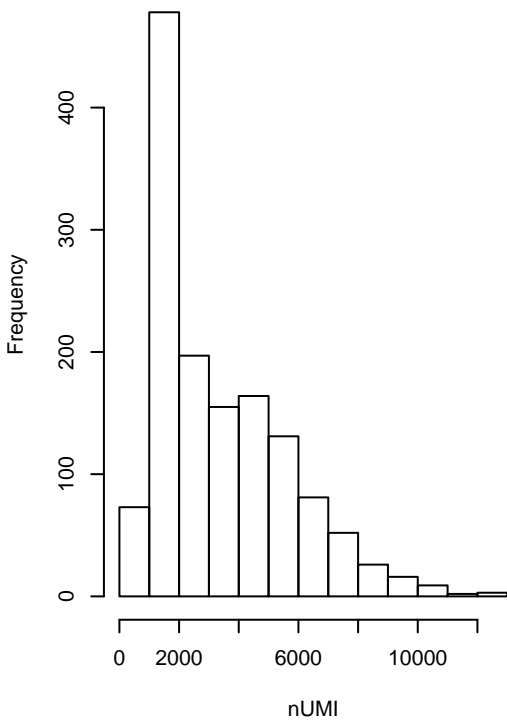**5HT**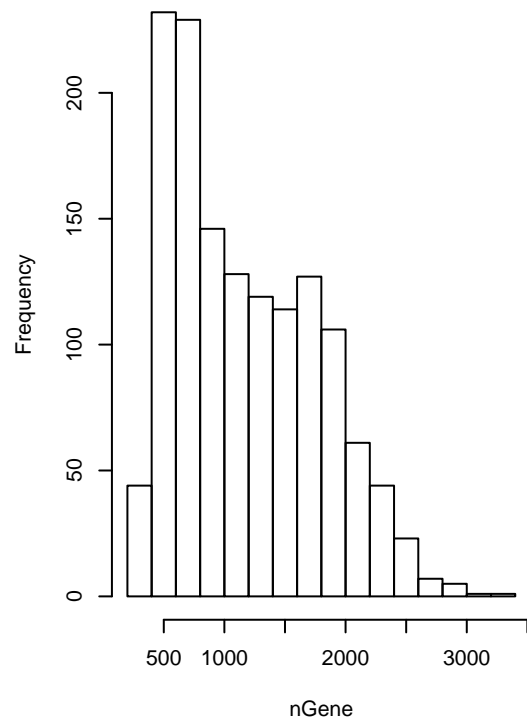**5HT**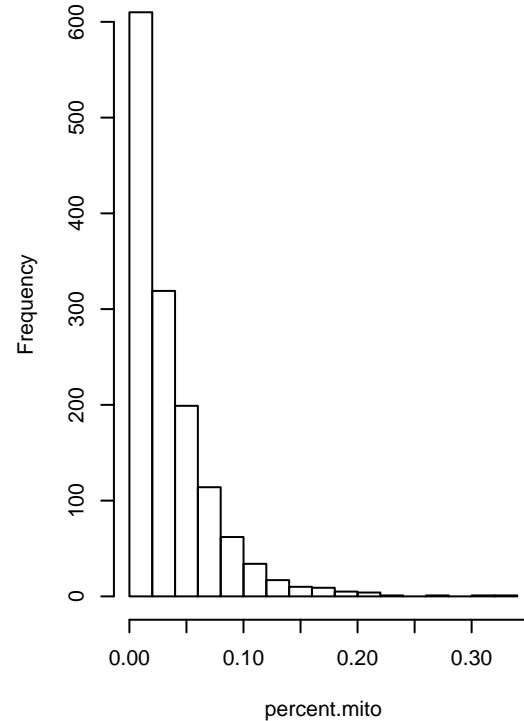**5HT**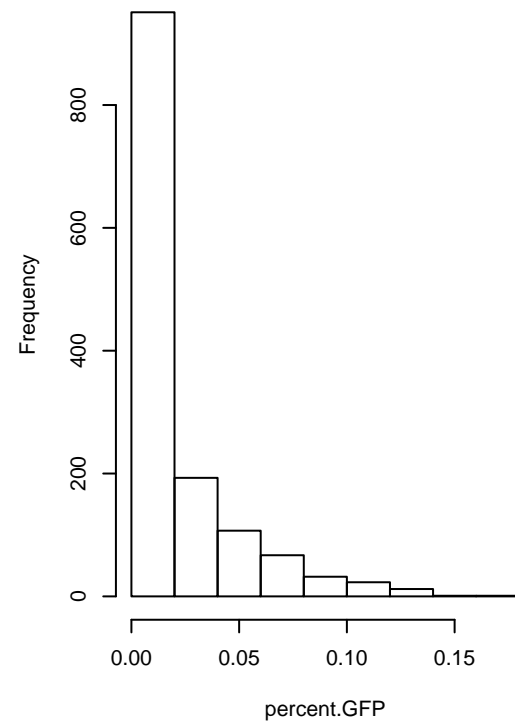

# CC1

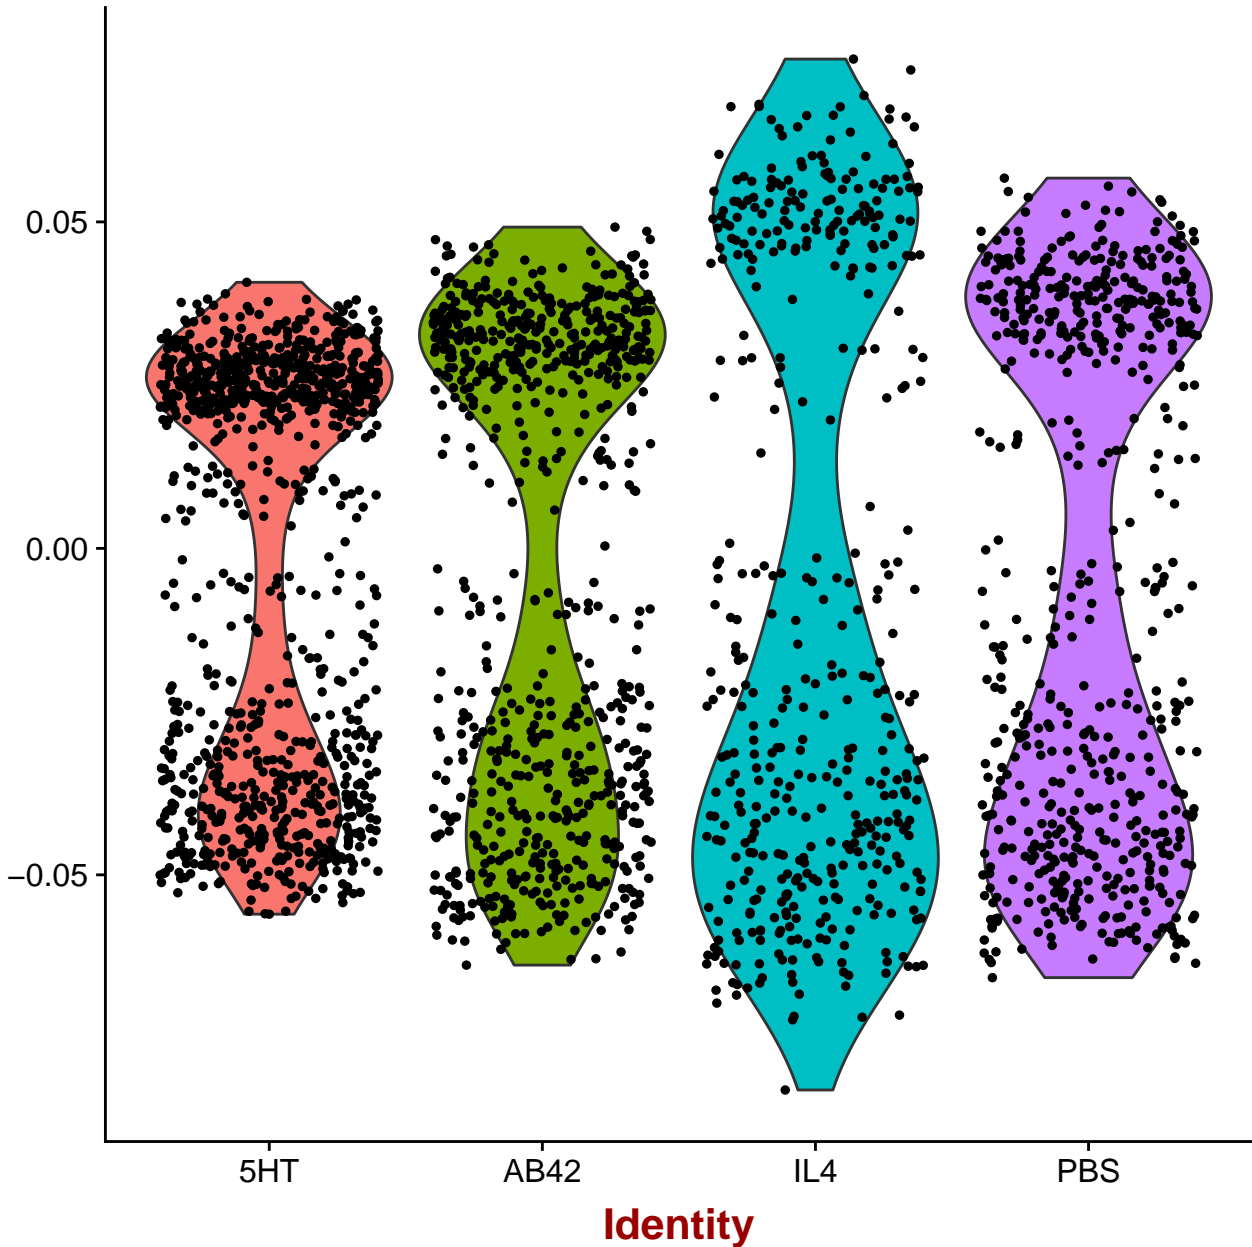

Supplement: pbio.3000585.s013.pdf [file pbio.3000585.s013.pdf]
