# Supplementary material for: Neuron-glia interaction through Serotonin-BDNF-NGFR axis enables regenerative neurogenesis in Alzheimer’s model of adult zebrafish brain
Source: PLoS Biol. 2020 Jan 6;18(1):e3000585. doi: 10.1371/journal.pbio.3000585 (PMC6964913; doi:10.1371/journal.pbio.3000585)
Supplement: S1 Data — DEG, differentially expressed gene; IL4, interleukin-4. (XLSX) [file pbio.3000585.s011.xlsx]

## Sheet: allResults
	baseMean	log2FoldChange	lfcSE	stat	pvalue	padj	IL4_N_R1.x	IL4_N_R2.x	PBS_N_R1.x	PBS_N_R2.x	IL4_N_R1.y	IL4_N_R2.y	PBS_N_R1.y	PBS_N_R2.y	SYMBOL	GENENAME
ENSDARG00000002968	1.06473	-3.29493	2.26073	-1.45747	0.144988		0	0	1	3	0	0	0.611773	1.91933	a1cf	apobec1 complementation factor
ENSDARG00000056314	0.320111	0.132556	4.47341	0.0296319	0.976361		1	0	0	1	0.689391	0	0	0.639775	a2ml	alpha-2-macroglobulin-like
ENSDARG00000102274	42.073	0.214161	0.362456	0.59086	0.554614	0.745724	49	56	46	55	33.7802	39.6503	28.1415	35.1876	aaas	achalasia, adrenocortical insufficiency, alacrimia
ENSDARG00000012468	109.123	-0.15153	0.238189	-0.636176	0.524662	0.723807	166	122	217	141	114.439	86.3811	132.755	90.2083	aacs	acetoacetyl-CoA synthetase
ENSDARG00000063621	7.45838	-1.29058	0.78092	-1.65264	0.0984042	0.244818	15	7	33	27	10.3409	4.95629	20.1885	17.2739	aadac	arylacetamide deacetylase
ENSDARG00000044802	12.8381	0.841875	0.745312	1.12956	0.258662	0.473024	6	10	6	4	4.13635	7.08042	3.67064	2.5591	aadacl4	arylacetamide deacetylase-like 4
ENSDARG00000011410	152.593	-0.393829	0.234082	-1.68244	0.0924835	0.233185	115	93	187	119	79.28	65.8479	114.401	76.1333	aadat	aminoadipate aminotransferase
ENSDARG00000075299	13.8478	0.574345	0.791409	0.725725	0.468008	0.677218	7	5	5	4	4.82574	3.54021	3.05886	2.5591	aaed1	AhpC/TSA antioxidant enzyme domain containing 1
ENSDARG00000041170	315.649	0.0784235	0.14131	0.554975	0.578912	0.763823	476	448	463	513	328.15	317.203	283.251	328.205	aagab	alpha- and gamma-adaptin binding protein
ENSDARG00000011855	70.403	-0.110978	0.231586	-0.479208	0.631791	0.800602	164	163	188	206	113.06	115.411	115.013	131.794	aak1a	AP2 associated kinase 1a
ENSDARG00000077686	100.43	0.149187	0.265679	0.561531	0.574436	0.760737	163	205	212	160	112.371	145.149	129.696	102.364	aak1b	AP2 associated kinase 1b
ENSDARG00000103957	282.098	0.218424	0.145094	1.50539	0.132223	0.301674	379	318	321	347	261.279	225.157	196.379	222.002	aamdc	adipogenesis associated, Mth938 domain containing
ENSDARG00000045019	510.928	-0.460547	0.136585	-3.37186	0.000746613	0.00452588	708	642	956	1114	488.089	454.563	584.855	712.71	aamp	angio-associated, migratory cell protein
ENSDARG00000036567	18.935	-1.3275	0.508267	-2.61181	0.00900647	0.0374425	19	17	55	46	13.0984	12.0367	33.6475	29.4297	aanat1	arylalkylamine N-acetyltransferase 1
ENSDARG00000079802	209.247	-5.99272	0.238389	-25.1384	1.89308e-139	3.36904e-136	43	37	2858	2828	29.6438	26.1975	1748.45	1809.28	aanat2	arylalkylamine N-acetyltransferase 2
ENSDARG00000018658	294.249	-0.0614454	0.145839	-0.421323	0.673519	0.82837	266	294	332	321	183.378	208.164	203.109	205.368	aar2	AAR2 splicing factor homolog (S. cerevisiae)
ENSDARG00000069142	773.101	-0.396235	0.0936519	-4.23093	2.32723e-05	0.000206826	686	571	960	887	472.922	404.292	587.302	567.481	aars	alanyl-tRNA synthetase
ENSDARG00000071240	148.029	0.0975199	0.209121	0.466332	0.640978	0.807339	199	193	203	206	137.189	136.652	124.19	131.794	aars2	alanyl-tRNA synthetase 2, mitochondrial (putative)
ENSDARG00000015747	115.749	-0.00215906	0.219154	-0.00985179	0.99214	0.996151	126	124	121	158	86.8633	87.7972	74.0245	101.085	aarsd1	alanyl-tRNA synthetase domain containing 1
ENSDARG00000022730	15.0019	0.985437	0.620023	1.58935	0.11198	0.268945	32	32	15	21	22.0605	22.6573	9.17659	13.4353	aasdh	aminoadipate-semialdehyde dehydrogenase
ENSDARG00000037501	161.23	-0.194648	0.196049	-0.992855	0.320781	0.541335	99	95	128	120	68.2497	67.264	78.3069	76.773	aasdhppt	aminoadipate-semialdehyde dehydrogenase-phosphopantetheinyl transferase
ENSDARG00000051816	121.905	0.174574	0.207325	0.842029	0.399772	0.618303	171	167	187	148	117.886	118.243	114.401	94.6868	aass	aminoadipate-semialdehyde synthase
ENSDARG00000025467	143.593	0.506125	0.205043	2.46838	0.0135726	0.0524152	169	216	149	154	116.507	152.937	91.1541	98.5254	aatf	apoptosis antagonizing transcription factor
ENSDARG00000078222	647.563	0.354203	0.126763	2.79422	0.00520244	0.0238727	1270	1447	1233	1144	875.527	1024.54	754.316	731.903	aatka	apoptosis-associated tyrosine kinase a
ENSDARG00000104442	1823.48	0.262597	0.0919677	2.85532	0.00429931	0.0203629	4385	4451	4281	3951	3022.98	3151.49	2619	2527.75	aatkb	apoptosis-associated tyrosine kinase b
ENSDARG00000006031	3115.15	-0.12717	0.0948349	-1.34096	0.179934	0.371667	1118	1183	1569	1244	770.739	837.613	959.871	795.881	abat	4-aminobutyrate aminotransferase
ENSDARG00000074635	641.347	-0.350311	0.105776	-3.31181	0.000926946	0.00545491	994	838	1344	1263	685.255	593.339	822.223	808.036	abca1a	ATP-binding cassette, sub-family A (ABC1), member 1A
ENSDARG00000079009	489.206	-1.81284	0.109207	-16.6	6.96813e-62	1.48811e-59	594	642	2413	2437	409.498	454.563	1476.21	1559.13	abca1b	ATP-binding cassette, sub-family A (ABC1), member 1B
ENSDARG00000013500	1197.87	0.418013	0.0799185	5.23049	1.69063e-07	2.25375e-06	3436	3598	2936	2944	2368.75	2547.53	1796.16	1883.5	abca2	ATP-binding cassette, sub-family A (ABC1), member 2
ENSDARG00000100524	711.517	0.309933	0.0943078	3.28639	0.00101479	0.00591157	1140	1216	1150	976	785.906	860.979	703.539	624.421	abca3b	ATP-binding cassette, sub-family A (ABC1), member 3b
ENSDARG00000057169	68.4497	-1.12056	0.275366	-4.06937	4.71414e-05	0.000388858	57	57	145	132	39.2953	40.3584	88.707	84.4503	abca4a	ATP-binding cassette, sub-family A (ABC1), member 4a
ENSDARG00000062661	7.5748	-2.21602	0.815836	-2.71626	0.00660245	0.0290008	6	15	45	64	4.13635	10.6206	27.5298	40.9456	abca4b	ATP-binding cassette, sub-family A (ABC1), member 4b
ENSDARG00000074041	324.36	0.401543	0.13589	2.95492	0.00312751	0.0155256	780	938	812	645	537.725	664.143	496.759	412.655	abca5	ATP-binding cassette, sub-family A (ABC1), member 5
ENSDARG00000061591	124.868	-0.0891099	0.186793	-0.477052	0.633325	0.801508	163	162	192	194	112.371	114.703	117.46	124.116	abcb10	ATP-binding cassette, sub-family B (MDR/TAP), member 10
ENSDARG00000011573	14.3781	-1.28244	0.572526	-2.23997	0.025093	0.0858416	12	24	47	51	8.27269	16.993	28.7533	32.6285	abcb11a	ATP-binding cassette, sub-family B (MDR/TAP), member 11a
ENSDARG00000070078	0.680939	4.76982	6.62861	0.719582	0.471783		5	4	0	0	3.44695	2.83217	0	0	abcb11b	ATP-binding cassette, sub-family B (MDR/TAP), member 11b
ENSDARG00000036787	197.207	-0.011688	0.240006	-0.0486988	0.961159	0.982113	69	70	100	57	47.568	49.5629	61.1773	36.4672	abcb3l1	ATP-binding cassette, sub-family B (MDR/TAP), member 3 like 1
ENSDARG00000010936	94.2561	-1.53339	0.232492	-6.59545	4.23966e-11	9.12723e-10	136	107	405	380	93.7572	75.7605	247.768	243.115	abcb4	ATP-binding cassette, sub-family B (MDR/TAP), member 4
ENSDARG00000021787	8.68645	1.35203	0.785001	1.72233	0.0850101	0.219473	13	19	6	8	8.96208	13.4528	3.67064	5.1182	abcb5	ATP-binding cassette, sub-family B (MDR/TAP), member 5
ENSDARG00000063297	47.2227	0.515215	0.360293	1.42999	0.15272	0.333451	108	118	70	106	74.4542	83.5489	42.8241	67.8162	abcb6a	ATP-binding cassette, sub-family B (MDR/TAP), member 6a
ENSDARG00000074254	20.4166	-0.318593	0.524927	-0.606928	0.543899	0.73833	23	26	26	42	15.856	18.4091	15.9061	26.8706	abcb6b	ATP-binding cassette, sub-family B (MDR/TAP), member 6b
ENSDARG00000062795	354.91	0.193863	0.130541	1.48507	0.137526	0.310105	367	422	393	378	253.006	298.794	240.427	241.835	abcb7	ATP-binding cassette, sub-family B (MDR/TAP), member 7
ENSDARG00000056672	202.816	-0.267846	0.17417	-1.53784	0.124087	0.289617	177	172	262	208	122.022	121.783	160.284	133.073	abcb8	ATP-binding cassette, sub-family B (MDR/TAP), member 8
ENSDARG00000056200	168.778	-0.131976	0.187056	-0.705543	0.480472	0.688166	282	223	332	286	194.408	157.893	203.109	182.976	abcb9	ATP-binding cassette, sub-family B (MDR/TAP), member 9
ENSDARG00000104719	159.168	0.424244	0.190644	2.22532	0.0260599	0.0885096	321	327	290	250	221.294	231.53	177.414	159.944	abcc1	ATP-binding cassette, sub-family C (CFTR/MRP), member 1
ENSDARG00000077988	186.854	0.409262	0.206751	1.97949	0.047761	0.14196	196	256	233	149	135.121	181.259	142.543	95.3265	abcc10	ATP-binding cassette, sub-family C (CFTR/MRP), member 10
ENSDARG00000013050	22.9167	-1.71321	0.454266	-3.77139	0.00016234	0.00117923	31	24	123	79	21.3711	16.993	75.248	50.5423	abcc12	ATP-binding cassette, sub-family C (CFTR/MRP), member 12
ENSDARG00000062519	4.69074	0.0651592	0.876189	0.0743666	0.940719	0.97203	9	19	15	15	6.20452	13.4528	9.17659	9.59663	abcc13	ATP-binding cassette, sub-family C (CFTR/MRP), member 13
ENSDARG00000014031	72.4026	-2.20888	0.617415	-3.57762	0.000346737	0.00230038	122	72	495	503	84.1057	50.979	302.827	321.807	abcc2	ATP-binding cassette, sub-family C (CFTR/MRP), member 2
ENSDARG00000096662	143.48	-1.18536	0.218232	-5.43165	5.58358e-08	8.02442e-07	156	125	388	326	107.545	88.5052	237.368	208.567	abcc3	ATP-binding cassette, sub-family C (CFTR/MRP), member 3
ENSDARG00000058953	91.1006	-1.30098	0.219241	-5.93399	2.95664e-09	5.07164e-08	128	110	318	336	88.242	77.8846	194.544	214.965	abcc4	ATP-binding cassette, sub-family C (CFTR/MRP), member 4
ENSDARG00000061233	4124.53	-0.562745	0.080178	-7.0187	2.23935e-12	5.50962e-11	4623	4656	7647	7657	3187.05	3296.64	4678.23	4898.76	abcc5	ATP-binding cassette, sub-family C (CFTR/MRP), member 5
ENSDARG00000016750	19.3298	0.0175027	0.484173	0.0361497	0.971163	0.986178	37	55	59	43	25.5075	38.9423	36.0946	27.5103	abcc6a	ATP-binding cassette, sub-family C (CFTR/MRP), member 6a
ENSDARG00000094901	1.15398	-0.171043	2.15355	-0.0794241	0.936695		1	3	1	4	0.689391	2.12413	0.611773	2.5591	abcc6b.2	ATP-binding cassette, sub-family C (CFTR/MRP), member 6b, tandem duplicate 2
ENSDARG00000105403	3.14609	0.225746	1.06175	0.212617	0.831626		13	6	7	11	8.96208	4.24825	4.28241	7.03753	abcc6b.2	ATP-binding cassette, sub-family C (CFTR/MRP), member 6b, tandem duplicate 2
ENSDARG00000051879	260.012	0.258234	0.144825	1.78308	0.0745734	0.199423	616	719	665	584	424.665	509.082	406.829	373.629	abcc8	ATP-binding cassette, sub-family C (CFTR/MRP), member 8
ENSDARG00000077007	17.5113	-0.0921219	0.554819	-0.16604	0.868126	0.940337	22	15	23	21	15.1666	10.6206	14.0708	13.4353	abcc8b	ATP-binding cassette, sub-family C (CFTR/MRP), member 8b
ENSDARG00000015985	91.9808	0.245014	0.227793	1.0756	0.282106	0.499143	254	267	299	194	175.105	189.047	182.92	124.116	abcc9	ATP-binding cassette, sub-family C (CFTR/MRP), member 9
ENSDARG00000074876	37.0666	-0.576465	0.491446	-1.173	0.240797	0.451014	9	12	18	17	6.20452	8.4965	11.0119	10.8762	abcd1	ATP-binding cassette, sub-family D (ALD), member 1
ENSDARG00000104085	1929.25	0.0687916	0.0909613	0.756273	0.449486	0.661194	1061	894	1111	971	731.444	632.989	679.679	621.222	abcd3a	ATP-binding cassette, sub-family D (ALD), member 3a
ENSDARG00000002947	165.899	-0.298397	0.181905	-1.6404	0.100922	0.249281	124	116	145	184	85.4845	82.1328	88.707	117.719	abcd3b	ATP-binding cassette, sub-family D (ALD), member 3b
ENSDARG00000061770	287.917	0.125601	0.157744	0.796229	0.425899	0.64166	336	312	331	332	231.635	220.909	202.497	212.405	abcd4	ATP-binding cassette, sub-family D (ALD), member 4
ENSDARG00000007216	1399.39	-0.080318	0.0882089	-0.910543	0.362536	0.582962	1761	1431	1990	1778	1214.02	1013.21	1217.43	1137.52	abce1	ATP-binding cassette, sub-family E (OABP), member 1
ENSDARG00000031795	1485.05	-0.161061	0.0831969	-1.9359	0.0528801	0.153626	1399	1242	1640	1655	964.458	879.388	1003.31	1058.83	abcf1	ATP-binding cassette, sub-family F (GCN20), member 1
ENSDARG00000038785	2251.34	-0.56762	0.0615762	-9.21816	3.0223e-20	1.40926e-18	2963	3041	4884	5050	2042.67	2153.16	2987.9	3230.87	abcf2a	ATP-binding cassette, sub-family F (GCN20), member 2a
ENSDARG00000052331	193.232	-0.242322	0.230858	-1.04966	0.293874	0.512074	336	339	481	412	231.635	240.026	294.263	263.587	abcf2b	ATP-binding cassette, sub-family F (GCN20), member 2b
ENSDARG00000089705	86.2358	-0.263237	0.233747	-1.12616	0.260096	0.474639	79	114	128	131	54.4619	80.7168	78.3069	83.8106	abcf3	ATP-binding cassette, sub-family F (GCN20), member 3
ENSDARG00000063475	129.525	-0.813948	0.256037	-3.17902	0.00147775	0.0081861	274	202	424	507	188.893	143.024	259.392	324.366	abcg1	ATP-binding cassette, sub-family G (WHITE), member 1
ENSDARG00000100075	163.367	-2.03612	0.195744	-10.402	2.42898e-25	1.53019e-23	212	144	832	796	146.151	101.958	508.995	509.261	abcg2a	ATP-binding cassette, sub-family G (WHITE), member 2a
ENSDARG00000079361	1.71897	0.46221	1.8566	0.248955	0.803395		0	6	5	0	0	4.24825	3.05886	0	abcg2b	ATP-binding cassette, sub-family G (WHITE), member 2b
ENSDARG00000058574	164.307	-0.596409	0.179378	-3.32487	0.000884605	0.00525059	162	160	284	260	111.681	113.287	173.743	166.342	abcg2c	ATP-binding cassette, sub-family G (WHITE), member 2c
ENSDARG00000016818	11.1429	0.0287399	0.649531	0.0442472	0.964707	0.983445	23	14	8	32	15.856	9.91259	4.89418	20.4728	abcg2d	ATP-binding cassette, sub-family G (WHITE), member 2d
ENSDARG00000061047	76.1352	0.0383513	0.245684	0.1561	0.875954	0.943648	177	175	227	157	122.022	123.907	138.872	100.445	abcg4a	ATP-binding cassette, sub-family G (WHITE), member 4a
ENSDARG00000078068	56.8955	0.096395	0.295638	0.326057	0.744381	0.871635	117	118	138	108	80.6587	83.5489	84.4246	69.0957	abcg4b	ATP-binding cassette, sub-family G (WHITE), member 4b
ENSDARG00000063078	0.874795	-1.23157	2.40625	-0.51182	0.608777		2	1	8	0	1.37878	0.708042	4.89418	0	abcg5	ATP-binding cassette, sub-family G (WHITE), member 5
ENSDARG00000063059	1.58044	2.13745	2.30404	0.927697	0.353565		4	0	0	1	2.75756	0	0	0.639775	abcg8	ATP-binding cassette, sub-family G (WHITE), member 8
ENSDARG00000071341	35.4495	0.0472183	0.384172	0.122909	0.902179	0.955701	50	77	53	84	34.4695	54.5192	32.424	53.7411	abch1	ATP-binding cassette, sub-family H, member 1
ENSDARG00000076435	137.291	0.521975	0.181634	2.87378	0.00405596	0.0193692	282	237	193	210	194.408	167.806	118.072	134.353	abhd10a	abhydrolase domain containing 10a
ENSDARG00000075627	266.434	0.257141	0.163632	1.57146	0.116076	0.276296	180	176	182	151	124.09	124.615	111.343	96.6061	abhd10b	abhydrolase domain containing 10b
ENSDARG00000069501	133.909	-0.0740914	0.215839	-0.343271	0.731394	0.864843	111	118	160	110	76.5224	83.5489	97.8836	70.3753	abhd11	abhydrolase domain containing 11
ENSDARG00000071004	332.064	-0.981525	0.131067	-7.48871	6.95513e-14	1.97781e-12	527	485	1186	1047	363.309	343.4	725.562	669.845	abhd12	abhydrolase domain containing 12
ENSDARG00000059209	148.125	-0.169365	0.198716	-0.852297	0.394049	0.612663	178	196	239	231	122.712	138.776	146.214	147.788	abhd13	abhydrolase domain containing 13
ENSDARG00000058367	68.3267	0.0335541	0.305039	0.109999	0.91241	0.960354	116	92	95	131	79.9694	65.1398	58.1184	83.8106	abhd14a	abhydrolase domain containing 14A
ENSDARG00000100531	221.992	-0.108581	0.246541	-0.440417	0.659635	0.81942	45	54	45	74	31.0226	38.2343	27.5298	47.3434	abhd14b	abhydrolase domain containing 14B
ENSDARG00000078768	98.4537	-0.234244	0.289209	-0.809947	0.417971	0.634871	270	230	326	330	186.136	162.85	199.438	211.126	abhd15a	abhydrolase domain containing 15a
ENSDARG00000078929	858.442	-0.158614	0.099511	-1.59394	0.11095	0.267251	1122	1067	1348	1379	773.497	755.481	824.67	882.25	abhd16a	abhydrolase domain containing 16A
ENSDARG00000091433	76.0337	0.110854	0.275173	0.402851	0.687058	0.83663	103	119	123	107	71.0073	84.257	75.248	68.456	abhd17aa	abhydrolase domain containing 17Aa
ENSDARG00000043084	62.9554	-0.513528	0.285472	-1.79887	0.0720386	0.194431	102	94	148	164	70.3179	66.5559	90.5424	104.923	abhd17ab	abhydrolase domain containing 17Ab
ENSDARG00000035571	269.872	-0.507288	0.151416	-3.35029	0.000807279	0.00485094	314	320	550	458	216.469	226.573	336.475	293.017	abhd17b	abhydrolase domain containing 17B
ENSDARG00000058452	551.858	0.0409042	0.11835	0.34562	0.729628	0.863983	749	692	826	739	516.354	489.965	505.324	472.794	abhd17c	abhydrolase domain containing 17C
ENSDARG00000101961	313.682	0.0155875	0.142669	0.109256	0.912999	0.960588	335	365	400	374	230.946	258.435	244.709	239.276	abhd18	abhydrolase domain containing 18
ENSDARG00000025797	971.202	-0.160432	0.0864136	-1.85656	0.0633743	0.176647	2061	2125	2797	2435	1420.83	1504.59	1711.13	1557.85	abhd2a	abhydrolase domain containing 2a
ENSDARG00000045804	91.6279	0.126133	0.252695	0.499153	0.617672	0.790991	262	190	241	221	180.62	134.528	147.437	141.39	abhd2b	abhydrolase domain containing 2b
ENSDARG00000018809	1166.09	0.492102	0.0851045	5.78232	7.3677e-09	1.192e-07	2628	2468	2069	1977	1811.72	1747.45	1265.76	1264.84	abhd3	abhydrolase domain containing 3
ENSDARG00000102887	460.579	0.311346	0.122013	2.55175	0.0107184	0.0432137	637	580	497	596	439.142	410.664	304.051	381.306	abhd4	abhydrolase domain containing 4
ENSDARG00000060756	9.98328	-0.180905	0.688781	-0.262645	0.792824	0.899198	25	17	25	28	17.2348	12.0367	15.2943	17.9137	abhd6a	abhydrolase domain containing 6a
ENSDARG00000070894	2.06383	0.166335	2.39045	0.0695831	0.944525		0	1	1	0	0	0.708042	0.611773	0	abhd6b	abhydrolase domain containing 6b
ENSDARG00000103518	305.846	0.254427	0.137974	1.84401	0.0651811	0.180639	778	793	849	626	536.346	561.477	519.395	400.499	abhd8a	abhydrolase domain containing 8a
ENSDARG00000076620	15.6625	-1.84621	0.555396	-3.32414	0.000886908	0.00525976	24	20	101	76	16.5454	14.1608	61.789	48.6229	abhd8b	abhydrolase domain containing 8b
ENSDARG00000010155	756.577	-0.485097	0.0937371	-5.17508	2.2781e-07	2.95931e-06	738	795	1262	1137	508.771	562.893	772.057	727.425	abi1a	abl-interactor 1a
ENSDARG00000062991	340.615	0.207561	0.168908	1.22884	0.219131	0.424507	651	656	583	679	448.794	464.475	356.663	434.407	abi1b	abl-interactor 1b
ENSDARG00000058207	648.112	0.712332	0.103657	6.87198	6.33176e-12	1.49475e-10	1151	1226	882	741	793.489	868.059	539.584	474.074	abi2a	abl-interactor 2a
ENSDARG00000014875	1015.74	-0.572197	0.0803659	-7.11989	1.08011e-12	2.73305e-11	1482	1423	2525	2301	1021.68	1007.54	1544.73	1472.12	abi2b	abl-interactor 2b
ENSDARG00000060072	1112.79	-0.809039	0.0915863	-8.83362	1.0134e-18	4.18612e-17	614	663	1305	1196	423.286	469.432	798.363	765.171	abi3a	ABI family, member 3a
ENSDARG00000063283	30.6183	0.0566544	0.482332	0.117459	0.906496	0.957756	36	20	31	29	24.8181	14.1608	18.965	18.5535	abi3b	ABI family, member 3b
ENSDARG00000071095	57.8979	-0.381986	0.313831	-1.21717	0.223539	0.429848	65	67	93	99	44.8104	47.4388	56.8949	63.3378	abi3bpb	ABI family, member 3 (NESH) binding protein b
ENSDARG00000035187	227.956	-0.295839	0.187798	-1.5753	0.115186	0.274665	195	195	279	256	134.431	138.068	170.685	163.782	abl1	c-abl oncogene 1, non-receptor tyrosine kinase
ENSDARG00000013841	143.852	0.0975652	0.225388	0.432876	0.665105	0.822642	268	271	267	295	184.757	191.879	163.343	188.734	abl2	c-abl oncogene 2, non-receptor tyrosine kinase
ENSDARG00000060149	331.922	0.539101	0.135434	3.98054	6.87601e-05	0.000546906	841	798	681	580	579.778	565.017	416.617	371.07	ablim1a	actin binding LIM protein 1a
ENSDARG00000045064	531.125	0.0756235	0.118488	0.638235	0.523321	0.72304	887	876	1044	828	611.49	620.245	638.691	529.734	ablim1b	actin binding LIM protein 1b
ENSDARG00000055223	264.255	0.499661	0.165647	3.01642	0.0025578	0.0131466	658	604	547	451	453.619	427.657	334.64	288.539	ablim2	actin binding LIM protein family, member 2
ENSDARG00000088168	168.687	0.0508148	0.166245	0.305663	0.759861	0.879917	331	342	374	352	228.188	242.15	228.803	225.201	ablim3	actin binding LIM protein family, member 3
ENSDARG00000019207	18.4888	0.752234	0.461207	1.63101	0.102888	0.252585	60	55	32	44	41.3635	38.9423	19.5767	28.1501	abo	ABO blood group (transferase A, alpha 1-3-N-acetylgalactosaminyltransferase; transferase B, alpha 1-3-galactosyltransferase)
ENSDARG00000038583	3.99257	1.37986	1.03763	1.32982	0.183576	0.376859	17	23	3	14	11.7196	16.285	1.83532	8.95686	abraa	actin binding Rho activating protein a
ENSDARG00000033854	0.770723	1.47782	2.60414	0.56749	0.570381		3	2	1	1	2.06817	1.41608	0.611773	0.639775	abrab	actin binding Rho activating protein b
ENSDARG00000042876	272.986	-0.773962	0.170468	-4.54023	5.61937e-06	5.66874e-05	510	546	1008	1009	351.589	386.591	616.667	645.533	abracl	ABRA C-terminal like
ENSDARG00000043666	164.277	-0.0100758	0.188903	-0.0533386	0.957462	0.980593	111	111	140	110	76.5224	78.5926	85.6482	70.3753	abt1	activator of basal transcription 1
ENSDARG00000063354	502.512	0.0643714	0.110949	0.580187	0.561789	0.751347	860	791	872	890	592.876	560.061	533.466	569.4	abtb1	ankyrin repeat and BTB (POZ) domain containing 1
ENSDARG00000059751	133.626	0.483826	0.200479	2.41335	0.0158068	0.0593062	444	425	355	339	306.09	300.918	217.179	216.884	abtb2a	ankyrin repeat and BTB (POZ) domain containing 2a
ENSDARG00000062000	270.667	-0.186414	0.190971	-0.976137	0.328997	0.550243	428	347	555	431	295.059	245.691	339.534	275.743	abtb2b	ankyrin repeat and BTB (POZ) domain containing 2b
ENSDARG00000004687	656.704	-0.475355	0.118007	-4.02819	5.62078e-05	0.000455377	272	242	411	387	187.514	171.346	251.439	247.593	acaa1	acetyl-CoA acyltransferase 1
ENSDARG00000038881	548.248	-0.42262	0.115017	-3.67443	0.000238382	0.00165665	282	244	395	392	194.408	172.762	241.65	250.792	acaa2	acetyl-CoA acyltransferase 2
ENSDARG00000078512	1004.73	0.422175	0.0938086	4.50039	6.78289e-06	6.73433e-05	1404	1448	1242	1137	967.905	1025.24	759.822	727.425	acaca	acetyl-CoA carboxylase alpha
ENSDARG00000061994	206.389	0.185667	0.181452	1.02323	0.3062	0.524956	251	276	269	249	173.037	195.42	164.567	159.304	acacb	acetyl-CoA carboxylase beta
ENSDARG00000045411	216.407	-0.339465	0.234548	-1.44732	0.147808	0.3266	48	54	63	81	33.0908	38.2343	38.5417	51.8218	acad11	acyl-CoA dehydrogenase family, member 11
ENSDARG00000042658	568.055	0.0092961	0.139122	0.0668199	0.946725	0.975006	485	388	587	384	334.355	274.72	359.111	245.674	acad8	acyl-CoA dehydrogenase family, member 8
ENSDARG00000055620	324.327	0.403252	0.157072	2.56731	0.0102492	0.0416939	305	341	313	234	210.264	241.442	191.485	149.707	acad9	acyl-CoA dehydrogenase family, member 9
ENSDARG00000088357	2061.2	-0.384609	0.0820533	-4.6873	2.76827e-06	2.96485e-05	793	889	1251	1203	546.687	629.449	765.328	769.65	acadl	acyl-CoA dehydrogenase, long chain
ENSDARG00000038900	3109.64	-0.0597143	0.0593917	-1.00543	0.314689	0.534136	2923	2946	3562	3274	2015.09	2085.89	2179.13	2094.62	acadm	acyl-CoA dehydrogenase, C-4 to C-12 straight chain
ENSDARG00000030781	271.347	0.320829	0.174522	1.83833	0.0660131	0.182424	255	268	212	255	175.795	189.755	129.696	163.143	acads	acyl-CoA dehydrogenase, C-2 to C-3 short chain
ENSDARG00000076780	273.064	-0.0805225	0.151447	-0.531688	0.594942	0.775579	279	275	324	330	192.34	194.711	198.214	211.126	acadsb	acyl-CoA dehydrogenase, short/branched chain
ENSDARG00000016687	2683.28	-0.353547	0.0760258	-4.65036	3.31363e-06	3.49116e-05	1104	1231	1752	1584	761.088	871.599	1071.83	1013.4	acadvl	acyl-CoA dehydrogenase, very long chain
ENSDARG00000035891	59.4612	-1.0274	0.381929	-2.69004	0.00714442	0.0309172	20	24	43	57	13.7878	16.993	26.3062	36.4672	acana	aggrecan a
ENSDARG00000045799	218.148	-1.49471	0.803021	-1.86135	0.0626943	0.175226	5	1	17	2	3.44695	0.708042	10.4001	1.27955	acanb	aggrecan b
ENSDARG00000056346	219.475	0.306404	0.1998	1.53356	0.125139	0.291155	540	484	513	413	372.271	342.692	313.839	264.227	acap1	ArfGAP with coiled-coil, ankyrin repeat and PH domains 1
ENSDARG00000075990	632.481	-0.0888056	0.159013	-0.55848	0.576517	0.762234	124	114	164	119	85.4845	80.7168	100.331	76.1333	acap3a	ArfGAP with coiled-coil, ankyrin repeat and PH domains 3a
ENSDARG00000099240	247.77	-0.231578	0.169715	-1.36452	0.172405	0.361679	505	483	700	597	348.142	341.984	428.241	381.946	acap3b	ArfGAP with coiled-coil, ankyrin repeat and PH domains 3b
ENSDARG00000045888	1906.05	-0.206366	0.0817821	-2.52336	0.0116238	0.0461323	1674	1754	2249	2170	1154.04	1241.91	1375.88	1388.31	acat1	acetyl-CoA acetyltransferase 1
ENSDARG00000007127	1145.2	-0.0405766	0.0931371	-0.435666	0.663079	0.821531	695	656	800	752	479.127	464.475	489.418	481.111	acat2	acetyl-CoA acetyltransferase 2
ENSDARG00000042623	973.571	-0.185503	0.0936621	-1.98056	0.047641	0.141702	1165	1174	1451	1518	803.14	831.241	887.682	971.179	acbd3	acyl-Coenzyme A binding domain containing 3
ENSDARG00000027070	51.2356	-0.341812	0.305429	-1.11912	0.263087	0.477935	124	78	165	121	85.4845	55.2273	100.942	77.4128	acbd4	acyl-CoA binding domain containing 4
ENSDARG00000034883	410.361	0.245632	0.12431	1.97596	0.0481588	0.142904	438	453	442	398	301.953	320.743	270.404	254.631	acbd5a	acyl-CoA binding domain containing 5a
ENSDARG00000058410	17.7149	-0.711572	0.49219	-1.44573	0.148254	0.327058	28	38	64	57	19.3029	26.9056	39.1535	36.4672	acbd5b	acyl-CoA binding domain containing 5b
ENSDARG00000039456	288.267	0.000927732	0.145881	0.00635952	0.994926	0.997334	432	328	425	422	297.817	232.238	260.003	269.985	acbd6	acyl-CoA binding domain containing 6
ENSDARG00000094730	3568.95	0.0753504	0.0796629	0.945867	0.344217	0.566296	1705	1582	1820	1665	1175.41	1120.12	1113.43	1065.23	acbd7	acyl-CoA binding domain containing 7
ENSDARG00000052124	202.323	-0.00438751	0.180119	-0.0243589	0.980566	0.990195	290	253	282	325	199.923	179.135	172.52	207.927	accs	1-aminocyclopropane-1-carboxylate synthase homolog (Arabidopsis)(non-functional)
ENSDARG00000078055	86.9507	0.577822	0.288893	2.00013	0.0454866	0.136992	184	117	123	102	126.848	82.8409	75.248	65.2571	acd	ACD, shelterin complex subunit and telomerase recruitment factor
ENSDARG00000079166	207.113	-1.39111	0.185026	-7.51843	5.54375e-14	1.59344e-12	98	109	320	287	67.5603	77.1766	195.767	183.616	ace	angiotensin I converting enzyme (peptidyl-dipeptidase A) 1
ENSDARG00000016918	0.277967	3.58328	5.92492	0.604781	0.545324		4	0	0	0	2.75756	0	0	0	ace2	angiotensin I converting enzyme 2
ENSDARG00000010347	3.33734	-0.818642	1.44391	-0.566963	0.57074		1	2	6	0	0.689391	1.41608	3.67064	0	acer1	alkaline ceramidase 1
ENSDARG00000077782	51.1903	-0.0911481	0.276757	-0.329343	0.741896	0.870498	83	102	102	118	57.2194	72.2203	62.4008	75.4935	acer2	alkaline ceramidase 2
ENSDARG00000093366	30.1848	0.701469	0.411889	1.70305	0.0885585	0.226118	28	43	31	18	19.3029	30.4458	18.965	11.516	acer3	alkaline ceramidase 3
ENSDARG00000031796	598.216	0.227707	0.106224	2.14364	0.0320619	0.104102	1434	1395	1395	1304	988.587	987.718	853.423	834.267	ache	acetylcholinesterase
ENSDARG00000054290	8837.92	0.399332	0.0714613	5.58809	2.29577e-08	3.48957e-07	17533	16663	14620	14327	12087.1	11798.1	8944.12	9166.06	acin1a	apoptotic chromatin condensation inducer 1a
ENSDARG00000026842	1215	0.22592	0.0751683	3.00553	0.00265119	0.0135543	2089	1966	2038	1836	1440.14	1392.01	1246.79	1174.63	acin1b	apoptotic chromatin condensation inducer 1b
ENSDARG00000062478	161.392	-2.32753	0.176633	-13.1772	1.18719e-39	1.30019e-37	174	153	950	883	119.954	108.33	581.184	564.922	ackr3a	atypical chemokine receptor 3a
ENSDARG00000058179	2456.43	-0.60632	0.096112	-6.30847	2.81802e-10	5.50942e-09	433	403	822	602	298.506	285.341	502.877	385.145	ackr3b	atypical chemokine receptor 3b
ENSDARG00000078729	4.33917	-0.300354	1.03025	-0.291536	0.770642	0.886935	6	5	4	11	4.13635	3.54021	2.44709	7.03753	ackr4a	atypical chemokine receptor 4a
ENSDARG00000040133	800.441	-0.207306	0.135686	-1.52784	0.126553	0.293449	141	146	180	190	97.2041	103.374	110.119	121.557	ackr4b	atypical chemokine receptor 4b
ENSDARG00000099079	2313.31	-0.390892	0.0702564	-5.56379	2.6398e-08	3.97291e-07	1287	1175	1855	1750	887.246	831.949	1134.84	1119.61	aclya	ATP citrate lyase a
ENSDARG00000055652	123.975	0.0409948	0.242079	0.169345	0.865525	0.938997	188	173	206	186	129.605	122.491	126.025	118.998	aclyb	ATP citrate lyase b
ENSDARG00000062549	5.60036	1.98054	1.02249	1.93699	0.0527467	0.153364	10	18	6	2	6.89391	12.7448	3.67064	1.27955	acmsd	aminocarboxymuconate semialdehyde decarboxylase
ENSDARG00000026376	772.447	-0.370209	0.116473	-3.1785	0.00148038	0.00819466	582	583	941	744	401.226	412.788	575.678	475.993	aco1	aconitase 1, soluble
ENSDARG00000007294	2962.11	-0.198215	0.0560326	-3.53749	0.000403946	0.00262928	2810	2625	3586	3378	1937.19	1858.61	2193.82	2161.16	aco2	aconitase 2, mitochondrial
ENSDARG00000058229	21.9227	0.0472169	0.554023	0.0852255	0.932082	0.968555	18	7	16	11	12.409	4.95629	9.78836	7.03753	acot11a	acyl-CoA thioesterase 11a
ENSDARG00000042122	150.256	0.00765898	0.300456	0.0254912	0.979663	0.989954	37	43	49	40	25.5075	30.4458	29.9769	25.591	acot11b	acyl-CoA thioesterase 11b
ENSDARG00000054534	2.24342	-1.09251	1.83065	-0.596789	0.550648		3	2	9	3	2.06817	1.41608	5.50595	1.91933	acot12	acyl-CoA thioesterase 12
ENSDARG00000061728	45.8352	-0.501657	0.342589	-1.46431	0.143109	0.319222	54	35	56	84	37.2271	24.7815	34.2593	53.7411	acot13	acyl-CoA thioesterase 13
ENSDARG00000018653	112.893	0.0651294	0.195243	0.333581	0.738696	0.868994	177	160	162	197	122.022	113.287	99.1072	126.036	acot7	acyl-CoA thioesterase 7
ENSDARG00000014138	173.97	-0.610433	0.196323	-3.10933	0.00187513	0.0100895	129	114	205	209	88.9314	80.7168	125.413	133.713	acot8	acyl-CoA thioesterase 8
ENSDARG00000058352	214.939	0.0930522	0.174229	0.534081	0.593285	0.774564	279	322	296	333	192.34	227.989	181.085	213.045	acot9.1	acyl-CoA thioesterase 9, tandem duplicate 1
ENSDARG00000058390	6.28394	-0.397697	0.806941	-0.492845	0.622122	0.793942	9	4	7	12	6.20452	2.83217	4.28241	7.6773	acot9.2	acyl-CoA thioesterase 9, tandem duplicate 2
ENSDARG00000014727	770.796	0.0195169	0.095105	0.205215	0.837404	0.924899	596	582	661	637	410.877	412.08	404.382	407.537	acox1	acyl-CoA oxidase 1, palmitoyl
ENSDARG00000038865	356.781	-0.215449	0.140496	-1.53349	0.125155	0.291155	233	269	352	300	160.628	190.463	215.344	191.933	acox3	acyl-CoA oxidase 3, pristanoyl
ENSDARG00000020149	67.3023	0.470814	0.305338	1.54194	0.123088	0.288104	116	73	78	74	79.9694	51.6871	47.7183	47.3434	acoxl	acyl-CoA oxidase-like
ENSDARG00000076486	534.934	-0.230709	0.126688	-1.82108	0.0685945	0.187665	716	705	939	923	493.604	499.169	574.455	590.513	acp1	acid phosphatase 1, soluble
ENSDARG00000007244	279.044	-0.691029	0.164785	-4.19353	2.74652e-05	0.000239504	205	255	413	417	141.325	180.551	252.662	266.786	acp2	acid phosphatase 2, lysosomal
ENSDARG00000019763	34.6558	-0.207033	0.410952	-0.50379	0.614409	0.788494	25	36	48	31	17.2348	25.4895	29.3651	19.833	acp5a	acid phosphatase 5a, tartrate resistant
ENSDARG00000101456	22.0321	0.435169	0.439369	0.990441	0.321959	0.542584	57	40	41	39	39.2953	28.3217	25.0827	24.9512	acp5b	acid phosphatase 5b, tartrate resistant
ENSDARG00000040064	217.104	-0.552881	0.166889	-3.31287	0.000923442	0.00543578	207	208	345	335	142.704	147.273	211.062	214.325	acp6	acid phosphatase 6, lysophosphatidic
ENSDARG00000101060	20.3175	0.137125	0.600099	0.228504	0.819254	0.914345	24	28	31	22	16.5454	19.8252	18.965	14.0751	acrc	acidic repeat containing
ENSDARG00000062077	0.213549	0.163299	6.66131	0.0245145	0.980442		1	0	1	0	0.689391	0	0.611773	0	acsbg1	acyl-CoA synthetase bubblegum family member 1
ENSDARG00000004094	3362.05	-0.0178695	0.0660545	-0.270526	0.786756	0.895758	6107	6075	7196	6588	4210.11	4301.35	4402.32	4214.84	acsbg2	acyl-CoA synthetase bubblegum family member 2
ENSDARG00000061201	161.546	-1.12912	0.302975	-3.72679	0.000193937	0.00138565	33	30	83	71	22.7499	21.2413	50.7771	45.4241	acsf2	acyl-CoA synthetase family member 2
ENSDARG00000059503	72.0844	-0.157504	0.311431	-0.505742	0.613038	0.787396	102	48	88	98	70.3179	33.986	53.836	62.698	acsf3	acyl-CoA synthetase family member 3
ENSDARG00000030514	704.9	0.452388	0.0841334	5.37703	7.57247e-08	1.07027e-06	2073	1895	1576	1659	1429.11	1341.74	964.154	1061.39	acsl1a	acyl-CoA synthetase long-chain family member 1a
ENSDARG00000003854	142.347	-0.122832	0.203411	-0.603862	0.545935	0.739937	302	289	402	318	208.196	204.624	245.933	203.449	acsl1b	acyl-CoA synthetase long-chain family member 1b
ENSDARG00000078399	2565.96	-0.671703	0.211557	-3.17504	0.00149815	0.00827374	45	46	90	72	31.0226	32.5699	55.0595	46.0638	acsl2	acyl-CoA synthetase long-chain family member 2
ENSDARG00000032079	8.5892	0.266745	0.822588	0.324276	0.745729	0.872121	10	3	5	7	6.89391	2.12413	3.05886	4.47843	acsl3a	acyl-CoA synthetase long-chain family member 3a
ENSDARG00000014674	449.304	0.195592	0.0946872	2.06567	0.03886	0.121383	846	792	840	758	583.225	560.769	513.889	484.95	acsl3b	acyl-CoA synthetase long-chain family member 3b
ENSDARG00000004078	2154.36	-0.629793	0.0629666	-10.002	1.49324e-23	8.43644e-22	2651	2697	4908	4344	1827.58	1909.59	3002.58	2779.18	acsl4a	acyl-CoA synthetase long-chain family member 4a
ENSDARG00000010752	1116.12	-1.88673	0.0890092	-21.197	1.01743e-99	6.03559e-97	938	906	3917	3700	646.649	641.486	2396.31	2367.17	acsl4b	acyl-CoA synthetase long-chain family member 4b
ENSDARG00000075931	7.45841	1.02335	0.89154	1.14784	0.251033	0.462947	15	5	8	3	10.3409	3.54021	4.89418	1.91933	acsl5	acyl-CoA synthetase long-chain family member 5
ENSDARG00000004880	81.9594	-0.0563201	0.42461	-0.13264	0.894478	0.952176	17	14	19	17	11.7196	9.91259	11.6237	10.8762	acsm3	acyl-CoA synthetase medium-chain family member 3
ENSDARG00000044142	526.072	0.0834681	0.115347	0.723624	0.469297	0.678283	453	402	428	472	312.294	284.633	261.839	301.974	acss1	acyl-CoA synthetase short-chain family member 1
ENSDARG00000037781	392.286	-0.232495	0.13168	-1.76561	0.0774611	0.204919	401	381	493	532	276.446	269.764	301.604	340.36	acss2	acyl-CoA synthetase short-chain family member 2
ENSDARG00000069029	22.5107	0.817988	0.45853	1.78394	0.0744339	0.199139	57	47	39	27	39.2953	33.278	23.8591	17.2739	acss2l	acyl-CoA synthetase short-chain family member 2 like
ENSDARG00000032218	144.277	-0.572966	0.291442	-1.96597	0.0493026	0.145631	36	45	81	54	24.8181	31.8619	49.5536	34.5479	acss3	acyl-CoA synthetase short-chain family member 3
ENSDARG00000036371	83.9686	-0.727255	0.321886	-2.25936	0.0238613	0.0827109	58	83	128	133	39.9847	58.7675	78.3069	85.0901	acta1a	actin, alpha 1a, skeletal muscle
ENSDARG00000055618	9.63851	-0.840385	0.684307	-1.22808	0.219417	0.424828	8	15	20	26	5.51513	10.6206	12.2355	16.6342	acta1b	actin, alpha 1b, skeletal muscle
ENSDARG00000045180	197.539	-0.597526	0.192337	-3.10667	0.00189208	0.0101679	390	349	705	546	268.862	247.107	431.3	349.317	acta2	actin, alpha 2, smooth muscle, aorta
ENSDARG00000037746	80029.4	-0.483308	0.0473341	-10.2106	1.77828e-24	1.05199e-22	77057	73245	117205	117320	53122.4	51860.5	71702.8	75058.4	actb1	actin, beta 1
ENSDARG00000037870	61121	-0.339511	0.0503133	-6.74793	1.49974e-11	3.37852e-10	84583	82562	119568	116606	58310.8	58457.3	73148.4	74601.6	actb2	actin, beta 2
ENSDARG00000042535	2.76529	1.15585	2.03827	0.567074	0.570664		2	0	1	0	1.37878	0	0.611773	0	actc1a	actin, alpha, cardiac muscle 1a
ENSDARG00000099197	28.5442	-0.217467	0.449919	-0.483347	0.62885	0.799388	32	22	35	35	22.0605	15.5769	21.412	22.3921	actc1b	actin, alpha, cardiac muscle 1b
ENSDARG00000070828	651.92	0.304817	0.103316	2.95033	0.00317434	0.0157215	752	679	647	646	518.422	480.76	395.817	413.295	actl6a	actin-like 6A
ENSDARG00000034107	177.281	0.0444717	0.16884	0.263397	0.792245	0.899012	360	381	386	416	248.181	269.764	236.144	266.147	actl6b	actin-like 6B
ENSDARG00000007219	473.224	0.210153	0.105917	1.98412	0.0472423	0.140739	692	680	685	640	477.059	481.468	419.064	409.456	actn1	actinin, alpha 1
ENSDARG00000071090	32.1018	-0.2384	0.534665	-0.445887	0.655679	0.816797	43	65	107	37	29.6438	46.0227	65.4597	23.6717	actn2b	actinin, alpha 2b
ENSDARG00000013755	3.70512	0.610225	1.47394	0.414008	0.678868	0.831731	0	12	8	1	0	8.4965	4.89418	0.639775	actn3a	actinin alpha 3a
ENSDARG00000001431	25.2779	0.924316	0.385485	2.3978	0.0164937	0.0613339	125	143	84	74	86.1739	101.25	51.3889	47.3434	actn3b	actinin alpha 3b
ENSDARG00000099786	346.116	-0.158894	0.175057	-0.907669	0.364053	0.584214	552	505	710	609	380.544	357.561	434.359	389.623	actn4	actinin, alpha 4
ENSDARG00000011611	2478.71	0.128548	0.0634684	2.02539	0.0428274	0.130793	4293	4044	4293	4221	2959.56	2863.32	2626.34	2700.49	actr1	ARP1 actin-related protein 1, centractin (yeast)
ENSDARG00000038432	1184.41	-0.125448	0.0841139	-1.49141	0.135854	0.307373	1229	1208	1536	1434	847.261	855.314	939.683	917.438	actr10	actin-related protein 10 homolog (S. cerevisiae)
ENSDARG00000052438	1274.52	-0.300377	0.0732842	-4.0988	4.15291e-05	0.000347666	1900	1939	2708	2574	1309.84	1372.89	1656.68	1646.78	actr2a	ARP2 actin-related protein 2a homolog (yeast)
ENSDARG00000070076	354.29	-0.548194	0.151914	-3.60857	0.000307886	0.00206973	387	456	752	628	266.794	322.867	460.053	401.779	actr2b	ARP2 actin-related protein 2b homolog (yeast)
ENSDARG00000100510	793.404	-0.429077	0.0917055	-4.67886	2.88474e-06	3.08032e-05	1149	1069	1634	1698	792.11	756.897	999.637	1086.34	actr3	ARP3 actin-related protein 3 homolog (yeast)
ENSDARG00000008790	105.273	0.363169	0.223038	1.62828	0.103465	0.253656	231	235	214	191	159.249	166.39	130.919	122.197	actr3b	ARP3 actin-related protein 3 homolog B (yeast)
ENSDARG00000098235	21.9971	0.42013	0.495909	0.847192	0.396888	0.615671	43	59	35	50	29.6438	41.7745	21.412	31.9888	actr5	ARP5 actin-related protein 5 homolog
ENSDARG00000021370	424.568	0.340475	0.132911	2.56168	0.0104167	0.0421883	538	610	474	538	370.892	431.905	289.98	344.199	actr6	ARP6 actin-related protein 6 homolog (yeast)
ENSDARG00000103610	201.679	0.389315	0.183772	2.11847	0.0341351	0.109701	292	263	239	234	201.302	186.215	146.214	149.707	actr8	ARP8 actin-related protein 8 homolog (yeast)
ENSDARG00000018968	686.025	-0.208387	0.106915	-1.9491	0.0512834	0.150214	747	708	1005	874	514.975	501.294	614.832	559.164	acvr1ba	activin A receptor, type IBa
ENSDARG00000052142	46.8612	-0.0267414	0.34485	-0.0775451	0.93819	0.971272	52	78	69	79	35.8483	55.2273	42.2123	50.5423	acvr1bb	activin A receptor, type IBb
ENSDARG00000014986	1036.86	0.211017	0.104447	2.02032	0.0433499	0.132009	1861	1808	1827	1714	1282.96	1280.14	1117.71	1096.57	acvr1l	activin A receptor, type I like
ENSDARG00000011188	958.457	0.0811349	0.0752267	1.07854	0.280793	0.497686	1567	1639	1781	1607	1080.28	1160.48	1089.57	1028.12	acvr2aa	activin A receptor, type IIAa
ENSDARG00000104700	19.1108	0.483761	0.472734	1.02333	0.306154	0.524947	26	34	25	23	17.9242	24.0734	15.2943	14.7148	acvr2ab	activin A receptor, type IIAb
ENSDARG00000044422	231.972	0.183939	0.169807	1.08322	0.278709	0.495487	308	295	278	314	212.332	208.872	170.073	200.889	acvr2b	activin A receptor, type IIB
ENSDARG00000018179	141.246	-1.77585	0.169267	-10.4915	9.45624e-26	6.01034e-24	150	146	575	557	103.409	103.374	351.769	356.355	acvrl1	activin A receptor type II-like 1
ENSDARG00000038475	154.484	0.195087	0.189485	1.02956	0.303215	0.522088	258	257	271	232	177.863	181.967	165.79	148.428	acy1	aminoacylase 1
ENSDARG00000093003	55.51	-0.45862	0.298936	-1.53418	0.124986	0.291049	52	93	109	114	35.8483	65.8479	66.6832	72.9344	acy3.1	aspartoacylase (aminocyclase) 3, tandem duplicate 1
ENSDARG00000005525	36.0157	-0.0923227	0.334552	-0.275959	0.78258	0.893175	66	83	101	77	45.4998	58.7675	61.789	49.2627	acy3.2	aspartoacylase (aminocyclase) 3, tandem duplicate 2
ENSDARG00000086271	14.0512	-1.84361	1.03923	-1.774	0.0760625	0.202492	2	1	5	7	1.37878	0.708042	3.05886	4.47843	acyp2	acylphosphatase 2, muscle type
ENSDARG00000003113	236.336	-0.829376	0.163578	-5.07021	3.97371e-07	4.93962e-06	341	413	812	688	235.082	292.421	496.759	440.165	ada	adenosine deaminase
ENSDARG00000089181	1.90088	1.17269	2.22237	0.527674	0.597726		0	2	1	0	0	1.41608	0.611773	0	adad1	adenosine deaminase domain containing 1 (testis-specific)
ENSDARG00000105626	2.871	-0.854729	1.44074	-0.593257	0.553009		5	2	5	9	3.44695	1.41608	3.05886	5.75798	adad2	adenosine deaminase domain containing 2
ENSDARG00000012986	35.0187	0.542558	0.448826	1.20884	0.226725	0.434176	40	31	14	40	27.5756	21.9493	8.56482	25.591	adal	adenosine deaminase-like
ENSDARG00000053468	1679.02	-0.243058	0.0837986	-2.90051	0.0037256	0.0180253	2104	2159	3089	2556	1450.48	1528.66	1889.77	1635.27	adam10a	ADAM metallopeptidase domain 10a
ENSDARG00000015502	19.4973	0.764662	0.462826	1.65216	0.0985023	0.244952	42	39	19	34	28.9544	27.6136	11.6237	21.7524	adam10b	ADAM metallopeptidase domain 10b
ENSDARG00000079204	181.166	0.197903	0.152288	1.29954	0.19376	0.390291	414	418	405	405	285.408	295.961	247.768	259.109	adam11	ADAM metallopeptidase domain 11
ENSDARG00000079068	29.6827	-0.61277	0.35726	-1.71519	0.0863095	0.221915	53	59	114	78	36.5377	41.7745	69.7421	49.9025	adam12	ADAM metallopeptidase domain 12
ENSDARG00000089213	114.32	-0.444919	0.213763	-2.08136	0.0374007	0.117804	136	130	195	209	93.7572	92.0454	119.296	133.713	adam15	ADAM metallopeptidase domain 15
ENSDARG00000043213	455.091	0.214941	0.116726	1.84142	0.0655603	0.181444	623	667	605	636	429.491	472.264	370.122	406.897	adam17a	ADAM metallopeptidase domain 17a
ENSDARG00000093093	77.8662	-0.00953029	0.263224	-0.036206	0.971118	0.986178	136	96	150	111	93.7572	67.972	91.7659	71.0151	adam17b	ADAM metallopeptidase domain 17b
ENSDARG00000059693	206.973	-0.243413	0.16374	-1.48658	0.137126	0.309498	193	240	289	284	133.052	169.93	176.802	181.696	adam19a	ADAM metallopeptidase domain 19a
ENSDARG00000067545	326.874	0.652865	0.125671	5.19503	2.04686e-07	2.67192e-06	830	884	588	629	572.194	625.909	359.722	402.419	adam19b	ADAM metallopeptidase domain 19b
ENSDARG00000060532	495.472	0.471683	0.128282	3.67691	0.000236074	0.00164435	922	902	774	696	635.618	638.654	473.512	445.284	adam22	ADAM metallopeptidase domain 22
ENSDARG00000062323	1370.78	0.416003	0.0937609	4.43685	9.12867e-06	8.83735e-05	4693	4043	3722	3585	3235.31	2862.61	2277.02	2293.59	adam23a	ADAM metallopeptidase domain 23a
ENSDARG00000001452	232.719	-0.567464	0.189188	-2.99947	0.00270453	0.013788	197	214	330	350	135.81	151.521	201.885	223.921	adam8a	ADAM metallopeptidase domain 8a
ENSDARG00000057644	136.44	0.0309074	0.234311	0.131908	0.895057	0.952504	99	113	121	111	68.2497	80.0087	74.0245	71.0151	adam8b	ADAM metallopeptidase domain 8b
ENSDARG00000010070	168.386	0.254444	0.173408	1.46732	0.14229	0.317861	300	269	286	247	206.817	190.463	174.967	158.025	adam9	ADAM metallopeptidase domain 9
ENSDARG00000103519	84.691	-1.42652	0.294334	-4.84661	1.2559e-06	1.42514e-05	70	79	212	235	48.2574	55.9353	129.696	150.347	adamts1	ADAM metallopeptidase with thrombospondin type 1 motif, 1
ENSDARG00000075188	45.4099	-0.865758	0.323734	-2.67429	0.00748883	0.0321277	35	44	84	77	24.1287	31.1538	51.3889	49.2627	adamts10	ADAM metallopeptidase with thrombospondin type 1 motif, 10
ENSDARG00000067549	6.75381	-0.463281	0.909302	-0.509491	0.610408	0.785957	13	15	18	25	8.96208	10.6206	11.0119	15.9944	adamts12	ADAM metallopeptidase with thrombospondin type 1 motif, 12
ENSDARG00000076270	0.575422	-0.678312	3.07342	-0.220703	0.825324		3	1	1	6	2.06817	0.708042	0.611773	3.83865	adamts13	ADAM metallopeptidase with thrombospondin type 1 motif, 13
ENSDARG00000029124	54.0481	-0.351818	0.331981	-1.05975	0.289257	0.507186	80	56	112	82	55.1513	39.6503	68.5185	52.4616	adamts15a	ADAM metallopeptidase with thrombospondin type 1 motif, 15a
ENSDARG00000001999	66.2696	-0.967591	0.369943	-2.61551	0.00890936	0.0371328	17	23	27	60	11.7196	16.285	16.5179	38.3865	adamts18	ADAM metallopeptidase with thrombospondin type 1 motif, 18
ENSDARG00000075930	28.9014	0.654138	0.438202	1.49278	0.135496	0.307036	39	23	26	18	26.8862	16.285	15.9061	11.516	adamts2	ADAM metallopeptidase with thrombospondin type 1 motif, 2
ENSDARG00000060127	18.0141	-0.288414	0.602783	-0.47847	0.632315	0.800885	32	10	29	28	22.0605	7.08042	17.7414	17.9137	adamts3	ADAM metallopeptidase with thrombospondin type 1 motif, 3
ENSDARG00000100307	40.0179	-0.694229	0.436098	-1.59191	0.111404	0.267925	23	23	38	45	15.856	16.285	23.2474	28.7899	adamts5	ADAM metallopeptidase with thrombospondin type 1 motif 5
ENSDARG00000041982	121.061	0.515214	0.420131	1.22632	0.22008	0.425534	17	15	12	13	11.7196	10.6206	7.34127	8.31708	adamts6	ADAM metallopeptidase with thrombospondin type 1 motif, 6
ENSDARG00000007709	254.975	-1.50596	0.425934	-3.53565	0.000406766	0.00264522	1	16	30	24	0.689391	11.3287	18.3532	15.3546	adamts8a	ADAM metallopeptidase with thrombospondin type 1 motif, 8a
ENSDARG00000077778	36.8299	-0.0182165	0.385328	-0.0472753	0.962294	0.982725	93	97	110	105	64.1134	68.6801	67.295	67.1764	adamts9	ADAM metallopeptidase with thrombospondin type 1 motif, 9
ENSDARG00000074033	11.1094	0.125506	0.623411	0.201322	0.840447	0.92631	15	20	22	14	10.3409	14.1608	13.459	8.95686	adamtsl2	ADAMTS-like 2
ENSDARG00000027903	172.88	0.0530377	0.237213	0.223586	0.823079	0.916506	201	238	265	209	138.568	168.514	162.12	133.713	adamtsl3	ADAMTS-like 3
ENSDARG00000052118	24.605	0.193648	0.548582	0.352997	0.72409	0.860432	29	55	33	49	19.9923	38.9423	20.1885	31.349	adamtsl5	ADAMTS like 5
ENSDARG00000055439	241.55	-0.135455	0.252795	-0.535832	0.592075	0.773639	54	39	57	57	37.2271	27.6136	34.871	36.4672	adamtsl7	ADAMTS-like 7
ENSDARG00000070565	83.6795	-0.75792	0.253537	-2.98939	0.00279539	0.0141633	101	84	202	148	69.6285	59.4755	123.578	94.6868	adap2	ArfGAP with dual PH domains 2
ENSDARG00000012389	429.112	0.131547	0.113902	1.15491	0.248126	0.459825	690	656	755	619	475.68	464.475	461.888	396.021	adar	adenosine deaminase, RNA-specific
ENSDARG00000041609	169.914	0.483481	0.165402	2.92307	0.00346598	0.0169129	592	636	486	495	408.119	450.315	297.322	316.689	adarb1a	adenosine deaminase, RNA-specific, B1a
ENSDARG00000003544	153.301	0.654704	0.216123	3.02931	0.00245116	0.0126717	391	355	269	260	269.552	251.355	164.567	166.342	adarb1b	adenosine deaminase, RNA-specific, B1b
ENSDARG00000071823	88.4041	-0.152375	0.251709	-0.60536	0.54494	0.739301	173	157	196	213	119.265	111.163	119.907	136.272	adarb2	adenosine deaminase, RNA-specific, B2 (non-functional)
ENSDARG00000061348	140.464	-0.408243	0.168417	-2.42401	0.0153502	0.0578676	157	158	240	227	108.234	111.871	146.825	145.229	adat1	adenosine deaminase, tRNA-specific 1
ENSDARG00000041944	39.2603	0.799785	0.336726	2.37518	0.0175403	0.0644734	68	77	44	49	46.8786	54.5192	26.918	31.349	adat2	adenosine deaminase, tRNA-specific 2, TAD2 homolog (S. cerevisiae)
ENSDARG00000005640	38.6696	0.140192	0.36931	0.379604	0.70424	0.847978	42	44	38	49	28.9544	31.1538	23.2474	31.349	adat3	adenosine deaminase, tRNA-specific 3
ENSDARG00000062561	138.2	-0.209789	0.181899	-1.15333	0.248776	0.460467	163	157	200	213	112.371	111.163	122.355	136.272	adck1	aarF domain containing kinase 1
ENSDARG00000073923	50.8834	0.213124	0.334836	0.636501	0.52445	0.723676	95	53	66	76	65.4921	37.5262	40.377	48.6229	adck2	aarF domain containing kinase 2
ENSDARG00000020123	360.811	-0.283462	0.153116	-1.85129	0.0641282	0.178416	393	316	495	468	270.931	223.741	302.827	299.415	adck3	aarF domain containing kinase 3
ENSDARG00000101130	222.578	0.0245692	0.171352	0.143384	0.885987	0.948833	238	197	234	243	164.075	139.484	143.155	155.465	adck4	aarF domain containing kinase 4
ENSDARG00000075405	127.01	0.60184	0.232345	2.59029	0.00958964	0.0394598	197	178	176	101	135.81	126.031	107.672	64.6173	adck5	aarF domain containing kinase 5
ENSDARG00000069026	111.394	-0.240785	0.234741	-1.02575	0.30501	0.523649	280	263	379	338	193.029	186.215	231.862	216.244	adcy1a	adenylate cyclase 1a
ENSDARG00000088634	3.75464	-1.08466	1.05543	-1.02769	0.304095	0.522824	3	5	10	9	2.06817	3.54021	6.11773	5.75798	adcy1b	adenylate cyclase 1b
ENSDARG00000058392	649.551	0.771974	0.102808	7.50889	5.96325e-14	1.70712e-12	1433	1418	954	911	987.897	1004	583.631	582.835	adcy2a	adenylate cyclase 2a
ENSDARG00000014588	113.849	0.0265265	0.21822	0.121559	0.903248	0.956217	290	221	270	289	199.923	156.477	165.179	184.895	adcy2b	adenylate cyclase 2b (brain)
ENSDARG00000077145	44.2651	-0.213929	0.353765	-0.60472	0.545365	0.739504	103	70	96	127	71.0073	49.5629	58.7302	81.2515	adcy3a	adenylate cyclase 3a
ENSDARG00000017437	2.17405	-1.51834	1.53002	-0.992363	0.321021		2	2	12	1	1.37878	1.41608	7.34127	0.639775	adcy3b	adenylate cyclase 3b
ENSDARG00000091342	135.416	0.0754442	0.204701	0.368559	0.712457	0.853497	370	328	365	374	255.075	232.238	223.297	239.276	adcy5	adenylate cyclase 5
ENSDARG00000061445	71.8672	0.528716	0.232547	2.27359	0.0229908	0.0803325	258	189	190	156	177.863	133.82	116.237	99.805	adcy6a	adenylate cyclase 6a
ENSDARG00000027797	146.815	0.0133833	0.182593	0.0732959	0.941571	0.972078	332	322	378	346	228.878	227.989	231.25	221.362	adcy6b	adenylate cyclase 6b
ENSDARG00000060070	367.964	-0.805335	0.140544	-5.73015	1.00344e-08	1.58737e-07	218	234	433	449	150.287	165.682	264.898	287.259	adcy7	adenylate cyclase 7
ENSDARG00000031783	212.616	0.308248	0.139869	2.20383	0.0275362	0.0923465	513	515	490	438	353.658	364.642	299.769	280.222	adcy8	adenylate cyclase 8 (brain)
ENSDARG00000100869	68.3254	-0.913706	0.320642	-2.84962	0.00437717	0.0206583	73	64	144	144	50.3255	45.3147	88.0953	92.1277	adcy9	adenylate cyclase 9
ENSDARG00000004015	74.4921	-0.363442	0.233743	-1.55488	0.119976	0.282911	194	166	266	251	133.742	117.535	162.732	160.584	adcyap1a	adenylate cyclase activating polypeptide 1a
ENSDARG00000027740	2888.9	-0.119338	0.0674	-1.77059	0.0766295	0.203443	8110	7928	9672	9775	5590.96	5613.36	5917.07	6253.8	adcyap1b	adenylate cyclase activating polypeptide 1b
ENSDARG00000105201	558.945	0.212508	0.119873	1.77277	0.0762672	0.202857	1822	1798	1914	1581	1256.07	1273.06	1170.93	1011.48	adcyap1r1a	adenylate cyclase activating polypeptide 1a (pituitary) receptor type I
ENSDARG00000053724	159.094	0.620428	0.188485	3.29166	0.000995968	0.00580827	203	218	156	150	139.946	154.353	95.4365	95.9663	adcyap1r1b	adenylate cyclase activating polypeptide 1b (pituitary) receptor type I
ENSDARG00000103962	1777.59	0.168708	0.0958192	1.76069	0.0782903	0.206467	2636	2757	2712	2648	1817.23	1952.07	1659.13	1694.13	add1	adducin 1 (alpha)
ENSDARG00000074581	389.761	0.498411	0.126211	3.94903	7.8467e-05	0.000616308	1190	1136	997	844	820.375	804.335	609.937	539.97	add2	adducin 2 (beta)
ENSDARG00000040874	4436.75	-0.248544	0.0672112	-3.69796	0.000217339	0.00152886	2555	2575	3603	3210	1761.39	1823.21	2204.22	2053.68	add3a	adducin 3 (gamma) a
ENSDARG00000056250	424.471	-0.0690577	0.104232	-0.66254	0.507625	0.710549	886	804	1028	952	610.8	569.266	628.902	609.066	add3b	adducin 3 (gamma) b
ENSDARG00000005595	27.9816	-0.525037	0.55568	-0.944855	0.344733	0.566863	14	6	13	19	9.65147	4.24825	7.95305	12.1557	adgb	androglobin
ENSDARG00000054177	191.46	0.476925	0.145191	3.28481	0.00102051	0.00593357	540	527	429	427	372.271	373.138	262.45	273.184	adgra1a	adhesion G protein-coupled receptor A1a
ENSDARG00000076994	35.9247	-0.385876	0.348897	-1.10599	0.268731	0.484714	90	71	101	133	62.0452	50.271	61.789	85.0901	adgra2	adhesion G protein-coupled receptor A2
ENSDARG00000075133	1951.05	0.011408	0.060604	0.188238	0.85069	0.931898	4739	4736	5263	5234	3267.02	3353.29	3219.76	3348.58	adgrb1a	adhesion G protein-coupled receptor B1a
ENSDARG00000078529	2173.96	0.136292	0.0963554	1.41447	0.157224	0.339468	7743	7362	7189	8131	5337.95	5212.6	4398.03	5202.01	adgrb1b	adhesion G protein-coupled receptor B1b
ENSDARG00000059832	1189.67	0.148292	0.091733	1.61656	0.105974	0.258089	2247	2088	2369	2004	1549.06	1478.39	1449.29	1282.11	adgrb3	adhesion G protein-coupled receptor B3
ENSDARG00000103067	314.957	-0.962992	0.228007	-4.22353	2.4051e-05	0.000212684	38	50	113	79	26.1969	35.4021	69.1303	50.5423	adgrd2	adhesion G protein-coupled receptor D2
ENSDARG00000075855	1322.68	-0.167597	0.0997678	-1.67987	0.0929831	0.234003	1146	1134	1421	1438	790.042	802.919	869.329	919.997	adgre10	adhesion G protein-coupled receptor E10
ENSDARG00000056062	11.6038	-0.136493	0.532803	-0.256179	0.797812	0.901974	35	27	38	38	24.1287	19.1171	23.2474	24.3115	adgre14	adhesion G protein-coupled receptor E14
ENSDARG00000096588	0.321122	0.159296	4.47463	0.0355999	0.971601		0	0	0	0	0	0	0	0	adgre15	adhesion G protein-coupled receptor E15
ENSDARG00000104083	5.73267	-0.922877	0.893607	-1.03276	0.301718	0.520813	11	6	21	15	7.5833	4.24825	12.8472	9.59663	adgre5b.2	adhesion G protein-coupled receptor E5b, duplicate 2
ENSDARG00000089904	286.489	-1.11422	0.154714	-7.20181	5.9417e-13	1.54557e-11	312	309	777	725	215.09	218.785	475.347	463.837	adgre5b.3	adhesion G protein-coupled receptor E5b, duplicate 3
ENSDARG00000096577	9.23775	-0.045023	0.719378	-0.062586	0.950096	0.976459	13	7	12	11	8.96208	4.95629	7.34127	7.03753	adgre9	adhesion G protein-coupled receptor E9
ENSDARG00000075134	0.104513	0.148482	6.76174	0.0219592	0.982481		0	1	0	1	0	0.708042	0	0.639775	adgrf11	adhesion G protein-coupled receptor F11
ENSDARG00000087870	1.81653	2.80814	1.60512	1.74949	0.0802072		14	5	1	2	9.65147	3.54021	0.611773	1.27955	adgrf3a	adhesion G protein-coupled receptor F3a
ENSDARG00000093008	59.5918	-0.0764321	0.352194	-0.217017	0.828195	0.919518	22	34	32	34	15.1666	24.0734	19.5767	21.7524	adgrf3b	adhesion G protein-coupled receptor F3b
ENSDARG00000093316	0.328707	-2.83826	4.68476	-0.605851	0.544614		0	0	3	0	0	0	1.83532	0	adgrf8	adhesion G protein-coupled receptor F8
ENSDARG00000027222	756.132	-0.0964609	0.100553	-0.959305	0.337405	0.559271	962	922	1189	1062	663.194	652.815	727.398	679.441	adgrg1	adhesion G protein-coupled receptor G1
ENSDARG00000041413	16.0418	-0.547339	0.677741	-0.807593	0.419325	0.635875	17	9	12	30	11.7196	6.37238	7.34127	19.1933	adgrg11	adhesion G protein-coupled receptor G11
ENSDARG00000088137	12.1061	-2.39827	0.822491	-2.91586	0.00354713	0.0172596	9	4	31	45	6.20452	2.83217	18.965	28.7899	adgrg2a	adhesion G protein-coupled receptor G2a
ENSDARG00000074782	797.306	-1.46346	0.0833479	-17.5584	5.12709e-69	1.31921e-66	799	780	2577	2290	550.823	552.273	1576.54	1465.09	adgrg3	adhesion G protein-coupled receptor G3
ENSDARG00000105416	5.54274	1.02634	0.860988	1.19205	0.23324	0.441703	11	18	10	6	7.5833	12.7448	6.11773	3.83865	adgrg4a	adhesion G protein-coupled receptor G4a
ENSDARG00000054137	17.4365	-0.696896	0.54136	-1.28731	0.197988	0.395868	39	28	59	62	26.8862	19.8252	36.0946	39.6661	adgrg6	adhesion G protein-coupled receptor G6
ENSDARG00000089292	202.433	0.444942	0.145845	3.05078	0.00228248	0.0119222	625	602	523	484	430.869	426.241	319.957	309.651	adgrl1a	adhesion G protein-coupled receptor L1a
ENSDARG00000069356	552.96	0.302166	0.121261	2.49187	0.0127073	0.0497026	949	934	849	856	654.232	661.311	519.395	547.648	adgrl2a	adhesion G protein-coupled receptor L2a
ENSDARG00000061121	532.404	0.30807	0.121271	2.54033	0.0110747	0.0444235	1194	1294	1122	1123	823.133	916.206	686.409	718.468	adgrl3.1	adhesion G protein-coupled receptor L3.1
ENSDARG00000013653	48.0434	-1.83479	0.376513	-4.87313	1.09844e-06	1.26256e-05	104	72	360	340	71.6967	50.979	220.238	217.524	adgrl4	adhesion G protein-coupled receptor L4
ENSDARG00000021137	452.362	0.116768	0.141868	0.823075	0.410466	0.628605	306	346	374	299	210.954	244.982	228.803	191.293	adgrv1	adhesion G protein-coupled receptor V1
ENSDARG00000080010	1626.49	-0.332716	0.0779669	-4.26739	1.97771e-05	0.000178361	1242	1269	1752	1779	856.224	898.505	1071.83	1138.16	adh5	alcohol dehydrogenase 5
ENSDARG00000091211	14.5624	-0.164399	0.546407	-0.300873	0.763511	0.882956	27	37	34	46	18.6136	26.1975	20.8003	29.4297	adh8a	alcohol dehydrogenase 8a
ENSDARG00000024278	246.263	-0.70954	0.218646	-3.24515	0.00117387	0.00669402	61	87	115	155	42.0528	61.5996	70.3539	99.1652	adh8b	alcohol dehydrogenase 8b
ENSDARG00000053518	320.909	0.495467	0.181296	2.73292	0.00627765	0.0278087	164	118	105	118	113.06	83.5489	64.2361	75.4935	adhfe1	alcohol dehydrogenase, iron containing, 1
ENSDARG00000020448	445.536	-0.0390964	0.131367	-0.297613	0.765999	0.884778	227	256	301	254	156.492	181.259	184.144	162.503	adi1	acireductone dioxygenase 1
ENSDARG00000062228	5.2066	-0.157812	1.01418	-0.155606	0.876344	0.943692	3	9	7	8	2.06817	6.37238	4.28241	5.1182	adipoqa	adiponectin, C1Q and collagen domain containing, a
ENSDARG00000100086	1.01472	-0.0852638	2.15462	-0.0395725	0.968434		1	4	4	2	0.689391	2.83217	2.44709	1.27955	adipoqb	adiponectin, C1Q and collagen domain containing, b
ENSDARG00000002912	1295.17	-0.226316	0.0839521	-2.69578	0.00702244	0.030513	1127	981	1411	1342	776.944	694.589	863.211	858.579	adipor1a	adiponectin receptor 1a
ENSDARG00000042717	668.46	-0.148136	0.0946656	-1.56483	0.117622	0.278764	709	646	870	807	488.778	457.395	532.242	516.299	adipor1b	adiponectin receptor 1b
ENSDARG00000101849	984.978	-0.72383	0.0975477	-7.42026	1.16888e-13	3.25034e-12	2134	1935	3647	3848	1471.16	1370.06	2231.14	2461.86	adipor2	adiponectin receptor 2
ENSDARG00000039429	658.079	-0.0442357	0.0891191	-0.496367	0.619636	0.79206	1229	1344	1539	1427	847.261	951.608	941.518	912.959	adka	adenosine kinase a
ENSDARG00000095947	268.784	-0.0118129	0.150272	-0.0786098	0.937343	0.970959	410	418	487	446	282.65	295.961	297.933	285.34	adkb	adenosine kinase b
ENSDARG00000045708	93.2066	-0.942282	0.212314	-4.43815	9.07345e-06	8.79135e-05	141	172	357	316	97.2041	121.783	218.403	202.169	adm2a	adrenomedullin 2a
ENSDARG00000078875	12.3832	-2.81829	0.577229	-4.88245	1.04777e-06	1.21018e-05	14	13	117	96	9.65147	9.20454	71.5774	61.4184	adm2b	adrenomedullin 2b
ENSDARG00000015263	311.422	-0.999584	0.150158	-6.65689	2.79685e-11	6.1324e-10	249	193	500	486	171.658	136.652	305.886	310.931	adma	adrenomedullin a
ENSDARG00000069027	76.2959	0.940648	0.246197	3.82071	0.000133069	0.000989839	250	260	155	142	172.348	184.091	94.8248	90.8481	admb	adrenomedullin b
ENSDARG00000025372	0.224001	-2.85831	5.82353	-0.49082	0.623554		0	0	2	1	0	0	1.22355	0.639775	admp	anti-dorsalizing morphogenic protein
ENSDARG00000060937	296.603	-0.0672391	0.141079	-0.476606	0.633643	0.801734	402	428	476	495	277.135	303.042	291.204	316.689	adnp2a	ADNP homeobox 2a
ENSDARG00000028431	527.267	-0.00378828	0.11774	-0.0321749	0.974333	0.987283	896	739	981	850	617.694	523.243	600.149	543.809	adnp2b	ADNP homeobox 2b
ENSDARG00000062002	0						0	0	0	0	0	0	0	0	adnpa	activity-dependent neuroprotector homeobox a
ENSDARG00000074293	262.256	0.219005	0.145338	1.50686	0.131846	0.301241	448	465	465	412	308.847	329.239	284.474	263.587	adnpb	activity-dependent neuroprotector homeobox b
ENSDARG00000042827	298.731	0.0945803	0.148568	0.636611	0.524378	0.723676	332	303	370	295	228.878	214.537	226.356	188.734	adoa	2-aminoethanethiol (cysteamine) dioxygenase a
ENSDARG00000053571	2.42154	0.333324	1.34069	0.248622	0.803653		5	4	5	3	3.44695	2.83217	3.05886	1.91933	adob	2-aminoethanethiol (cysteamine) dioxygenase b
ENSDARG00000075694	69.5678	0.531108	0.256295	2.07225	0.0382421	0.119926	128	124	107	88	88.242	87.7972	65.4597	56.3002	adora1b	adenosine A1 receptor b
ENSDARG00000033706	71.8932	0.339859	0.622699	0.545783	0.585215	0.768246	151	220	209	121	104.098	155.769	127.86	77.4128	adora2aa	adenosine A2a receptor a
ENSDARG00000058488	25.9258	-0.356959	0.367697	-0.970799	0.331649	0.553465	51	49	72	71	35.1589	34.694	44.0476	45.4241	adora2ab	adenosine A2a receptor b
ENSDARG00000002533	101.97	-0.0994174	0.266295	-0.373335	0.708899	0.851045	57	65	72	74	39.2953	46.0227	44.0476	47.3434	adora2b	adenosine A2b receptor
ENSDARG00000063525	63.8058	0.284549	0.265597	1.07136	0.284009	0.501265	82	86	75	79	56.5301	60.8916	45.883	50.5423	adpgk	ADP-dependent glucokinase
ENSDARG00000062785	55.4103	-0.00854267	0.345581	-0.0247197	0.980279	0.990195	98	55	104	68	67.5603	38.9423	63.6244	43.5047	adpgk2	ADP-dependent glucokinase 2
ENSDARG00000040712	530.959	-0.396378	0.150374	-2.63595	0.00839026	0.0352583	120	139	199	182	82.7269	98.4178	121.743	116.439	adprh	ADP-ribosylarginine hydrolase
ENSDARG00000041589	3.0417	0.0556641	1.17295	0.0474564	0.962149		5	8	7	7	3.44695	5.66433	4.28241	4.47843	adprhl1	ADP-ribosylhydrolase like 1
ENSDARG00000019338	177.822	0.0380026	0.166152	0.228722	0.819085	0.914327	300	304	300	356	206.817	215.245	183.532	227.76	adprhl2	ADP-ribosylhydrolase like 2
ENSDARG00000026090	126.875	-0.180545	0.216271	-0.834811	0.403824	0.622304	207	166	250	222	142.704	117.535	152.943	142.03	adprm	ADP-ribose/CDP-alcohol diphosphatase, manganese-dependent
ENSDARG00000028725	16.9886	-0.167888	0.514329	-0.326421	0.744106	0.871635	43	40	50	54	29.6438	28.3217	30.5886	34.5479	adra1aa	adrenoceptor alpha 1Aa
ENSDARG00000027638	345.746	0.619188	0.40304	1.53629	0.124466	0.290217	21	12	16	8	14.4772	8.4965	9.78836	5.1182	adra1ab	adrenoceptor alpha 1Ab
ENSDARG00000011317	44.6546	0.178799	0.355908	0.502373	0.615405	0.789345	48	64	67	44	33.0908	45.3147	40.9888	28.1501	adra1ba	adrenoceptor alpha 1Ba
ENSDARG00000041173	82.8111	-0.1012	0.651611	-0.155308	0.876579	0.943749	5	5	10	2	3.44695	3.54021	6.11773	1.27955	adra1bb	adrenoceptor alpha 1Bb
ENSDARG00000024101	33.6809	-0.168244	0.329144	-0.511157	0.609241	0.785075	72	84	101	95	49.6361	59.4755	61.789	60.7787	adra1d	adrenoceptor alpha 1D
ENSDARG00000040841	52.3614	0.152414	0.283434	0.537741	0.590756	0.772614	123	107	118	113	84.7951	75.7605	72.1892	72.2946	adra2a	adrenoceptor alpha 2A
ENSDARG00000102096	57.4908	0.0844295	0.33347	0.253185	0.800125	0.903239	100	106	108	109	68.9391	75.0524	66.0715	69.7355	adra2b	adrenoceptor alpha 2B
ENSDARG00000069669	173.417	0.49392	0.17321	2.85156	0.00435046	0.0205595	374	329	307	251	257.832	232.946	187.814	160.584	adra2c	adrenoceptor alpha 2C
ENSDARG00000091277	5.7909	0.285873	0.78859	0.362512	0.71697	0.855921	15	20	13	19	10.3409	14.1608	7.95305	12.1557	adra2da	adrenergic, alpha-2D-, receptor a
ENSDARG00000054667	3.00778	-0.913076	1.26384	-0.72246	0.470012		8	3	11	12	5.51513	2.12413	6.7295	7.6773	adra2db	adrenergic, alpha-2D-, receptor b
ENSDARG00000007490	254.246	0.808129	0.157504	5.13084	2.88447e-07	3.66018e-06	678	639	487	355	467.407	452.439	297.933	227.12	adrb1	adrenoceptor beta 1
ENSDARG00000088124	596.492	-0.416903	0.136888	-3.04558	0.00232232	0.0121082	326	252	470	392	224.741	178.427	287.533	250.792	adrb2a	adrenoceptor beta 2, surface a
ENSDARG00000054510	1.68576	-1.71004	1.97301	-0.866715	0.386098		0	3	4	7	0	2.12413	2.44709	4.47843	adrb2b	adrenoceptor beta 2, surface b
ENSDARG00000053646	20.2582	0.220865	0.489193	0.451488	0.651638	0.813728	31	23	37	15	21.3711	16.285	22.6356	9.59663	adrb3a	adrenoceptor beta 3a
ENSDARG00000052919	7.89977	-0.998111	0.777486	-1.28377	0.199223	0.397442	13	9	25	24	8.96208	6.37238	15.2943	15.3546	adrb3b	adrenoceptor beta 3b
ENSDARG00000104094	47.7537	0.656604	0.292165	2.24738	0.024616	0.0846263	147	158	104	112	101.34	111.871	63.6244	71.6548	adrbk2	adrenergic, beta, receptor kinase 2
ENSDARG00000058560	238.635	0.0243785	0.15631	0.155962	0.876063	0.94367	298	290	276	368	205.439	205.332	168.849	235.437	adrm1	adhesion regulating molecule 1
ENSDARG00000017049	455.939	-0.454497	0.120406	-3.7747	0.000160198	0.00116724	372	386	610	551	256.453	273.304	373.181	352.516	adsl	adenylosuccinate lyase
ENSDARG00000002071	31.5017	0.332667	0.414025	0.803494	0.421689	0.638196	97	68	100	47	66.8709	48.1468	61.1773	30.0694	adss	adenylosuccinate synthase
ENSDARG00000012399	626.023	-0.252763	0.0882637	-2.86373	0.00418687	0.0199053	783	752	1055	988	539.793	532.447	645.42	632.098	adssl	adenylosuccinate synthase, like
ENSDARG00000099517	75.0029	1.0637	0.291448	3.6497	0.000262544	0.00179997	122	192	79	89	84.1057	135.944	48.33	56.94	adssl1	adenylosuccinate synthase like 1
ENSDARG00000091726	196.286	-0.279232	0.248353	-1.12433	0.260871	0.475462	66	54	60	102	45.4998	38.2343	36.7064	65.2571	aebp1	AE binding protein 1
ENSDARG00000006038	488.409	-0.00644668	0.108945	-0.0591736	0.952814	0.977907	711	627	755	745	490.157	443.942	461.888	476.633	aebp2	AE binding protein 2
ENSDARG00000039099	0.592678	0.725857	2.7051	0.268329	0.788446		1	2	0	2	0.689391	1.41608	0	1.27955	aep1	aerolysin-like protein
ENSDARG00000021805	149.271	0.0791441	0.205143	0.3858	0.699645	0.845138	368	274	326	351	253.696	194.003	199.438	224.561	aes	amino-terminal enhancer of split
ENSDARG00000055284	132.933	-0.0419317	0.208258	-0.201345	0.840429	0.92631	246	252	326	248	169.59	178.427	199.438	158.664	afap1	actin filament associated protein 1
ENSDARG00000089162	21.2712	-1.87716	0.489624	-3.83388	0.000126137	0.000942214	15	19	81	59	10.3409	13.4528	49.5536	37.7467	afap1l1a	actin filament associated protein 1-like 1a
ENSDARG00000056453	609.314	-0.433967	0.118291	-3.66864	0.000243843	0.00168746	437	491	740	662	301.264	347.649	452.712	423.531	afap1l1b	actin filament associated protein 1-like 1b
ENSDARG00000074806	1181.98	-0.193796	0.098852	-1.96047	0.0499413	0.147211	480	492	671	572	330.908	348.357	410.499	365.952	afap1l2	actin filament associated protein 1-like 2
ENSDARG00000052242	652.766	0.6253	0.103757	6.02658	1.67465e-09	2.98032e-08	1760	1786	1360	1210	1213.33	1264.56	832.011	774.128	aff2	AF4/FMR2 family, member 2
ENSDARG00000079575	76.0924	0.76453	0.2356	3.24503	0.00117438	0.00669515	307	321	237	177	211.643	227.281	144.99	113.24	aff3	AF4/FMR2 family, member 3
ENSDARG00000001857	327.218	-0.0754163	0.198378	-0.380165	0.703823	0.847906	595	502	612	676	410.188	355.437	374.405	432.488	aff4	AF4/FMR2 family, member 4
ENSDARG00000062272	515.759	0.0444601	0.142275	0.312494	0.754665	0.876857	691	541	609	721	476.369	383.051	372.57	461.278	afg3l2	AFG3-like AAA ATPase 2
ENSDARG00000099106	246.801	0.155935	0.171605	0.908684	0.363517	0.58388	655	709	718	651	451.551	502.002	439.253	416.494	afmid	arylformamidase
ENSDARG00000095863	6.32025	0.317589	1.01318	0.313458	0.753932	0.87653	6	3	2	6	4.13635	2.12413	1.22355	3.83865	afp4	antifreeze protein type IV
ENSDARG00000069249	534.041	0.145014	0.13013	1.11438	0.265115	0.48022	783	661	760	698	539.793	468.016	464.947	446.563	aftpha	aftiphilin a
ENSDARG00000071347	110.248	-0.547788	0.261757	-2.09273	0.0363731	0.115216	54	54	114	63	37.2271	38.2343	69.7421	40.3058	aftphb	aftiphilin b
ENSDARG00000004889	225.4	-0.258875	0.203028	-1.27507	0.202285	0.401747	270	255	318	382	186.136	180.551	194.544	244.394	aga	aspartylglucosaminidase
ENSDARG00000062123	794.602	0.226802	0.108297	2.09427	0.0362363	0.114868	1554	1481	1549	1350	1071.31	1048.61	947.636	863.697	agap1	ArfGAP with GTPase domain, ankyrin repeat and PH domain 1
ENSDARG00000099874	667.509	0.0581516	0.0887712	0.655073	0.512421	0.714452	1529	1382	1578	1543	1054.08	978.514	965.377	987.173	agap2	ArfGAP with GTPase domain, ankyrin repeat and PH domain 2
ENSDARG00000087822	547.304	0.320784	0.130164	2.46445	0.0137222	0.0528688	988	927	819	891	681.118	656.355	501.042	570.04	agap3	ArfGAP with GTPase domain, ankyrin repeat and PH domain 3
ENSDARG00000104384	5.77861	-0.682113	0.827784	-0.824024	0.409926	0.628139	5	10	15	12	3.44695	7.08042	9.17659	7.6773	agbl1	ATP/GTP binding protein like 1
ENSDARG00000079983	17.2249	-0.157981	0.560615	-0.2818	0.778097	0.891052	23	14	23	23	15.856	9.91259	14.0708	14.7148	agbl2	ATP/GTP binding protein-like 2
ENSDARG00000068050	55.9873	0.226172	0.323609	0.698903	0.484613	0.691526	90	149	93	135	62.0452	105.498	56.8949	86.3697	agbl4	ATP/GTP binding protein-like 4
ENSDARG00000045900	432.15	-0.320178	0.125417	-2.55291	0.0106828	0.0430943	567	588	820	791	390.885	416.329	501.654	506.062	agbl5	ATP/GTP binding protein-like 5
ENSDARG00000030020	368.669	-0.545299	0.139577	-3.90678	9.35336e-05	0.000721902	603	493	867	916	415.703	349.065	530.407	586.034	agfg1a	ArfGAP with FG repeats 1a
ENSDARG00000019526	620.65	-0.0833663	0.116887	-0.713221	0.475709	0.684677	769	787	974	869	530.142	557.229	595.867	555.965	agfg1b	ArfGAP with FG repeats 1b
ENSDARG00000060109	204.916	0.112012	0.18081	0.619498	0.535588	0.732924	344	359	349	377	237.15	254.187	213.509	241.195	aggf1	angiogenic factor with G patch and FHA domains 1
ENSDARG00000009837	255.037	-0.18685	0.171766	-1.08781	0.276678	0.4936	282	205	337	282	194.408	145.149	206.167	180.417	agk	acylglycerol kinase
ENSDARG00000103811	1068.52	-0.303679	0.108712	-2.79344	0.00521502	0.0239084	946	804	1318	1096	652.164	569.266	806.316	701.194	agla	amylo-alpha-1, 6-glucosidase, 4-alpha-glucanotransferase a
ENSDARG00000100352	30.7532	-0.565799	0.335018	-1.68886	0.0912459	0.23108	109	81	169	145	75.1436	57.3514	103.39	92.7674	aglb	amylo-alpha-1, 6-glucosidase, 4-alpha-glucanotransferase b
ENSDARG00000059700	29.3659	0.0588942	0.649306	0.0907033	0.927728	0.966559	4	10	5	10	2.75756	7.08042	3.05886	6.39775	agmat	agmatine ureohydrolase (agmatinase)
ENSDARG00000025595	888.549	-0.640324	0.146735	-4.36382	1.27809e-05	0.000120348	112	97	200	164	77.2118	68.6801	122.355	104.923	agmo	alkylglycerol monooxygenase
ENSDARG00000092644	33.6496	0.589884	0.409582	1.44021	0.149808	0.329383	48	57	40	38	33.0908	40.3584	24.4709	24.3115	ago1	argonaute RISC catalytic component 1
ENSDARG00000061268	85.3509	0.434257	0.277301	1.56602	0.117345	0.278323	164	156	150	115	113.06	110.455	91.7659	73.5742	ago2	argonaute RISC catalytic component 2
ENSDARG00000063079	77.2589	-0.0897404	0.266454	-0.336795	0.736271	0.867775	119	122	160	127	82.0375	86.3811	97.8836	81.2515	ago3b	argonaute RISC catalytic component 3b
ENSDARG00000100854	248.334	0.167575	0.164271	1.02011	0.307676	0.526468	453	395	437	406	312.294	279.677	267.345	259.749	ago4	argonaute RISC catalytic component 4
ENSDARG00000101139	1184.55	0.22303	0.0681218	3.274	0.00106038	0.00611877	2333	2155	2208	2086	1608.35	1525.83	1350.79	1334.57	agpat2	1-acylglycerol-3-phosphate O-acyltransferase 2 (lysophosphatidic acid acyltransferase, beta)
ENSDARG00000036549	2297.89	-0.251814	0.0759557	-3.31528	0.000915526	0.00539989	1716	1568	2341	2029	1182.99	1110.21	1432.16	1298.1	agpat3	1-acylglycerol-3-phosphate O-acyltransferase 3
ENSDARG00000069044	217.773	-0.302248	0.142636	-2.11901	0.0340899	0.109592	442	430	643	559	304.711	304.458	393.37	357.634	agpat4	1-acylglycerol-3-phosphate O-acyltransferase 4 (lysophosphatidic acid acyltransferase, delta)
ENSDARG00000063187	229.676	-0.261565	0.164329	-1.59171	0.111449	0.267969	210	189	271	263	144.772	133.82	165.79	168.261	agpat5	1-acylglycerol-3-phosphate O-acyltransferase 5 (lysophosphatidic acid acyltransferase, epsilon)
ENSDARG00000006491	74.5263	-1.21982	0.314925	-3.87339	0.000107334	0.000815737	27	25	59	76	18.6136	17.701	36.0946	48.6229	agpat9l	1-acylglycerol-3-phosphate O-acyltransferase 9, like
ENSDARG00000042821	107.166	-0.173562	0.222021	-0.781737	0.434369	0.649237	144	117	183	146	99.2723	82.8409	111.954	93.4072	agps	alkylglycerone phosphate synthase
ENSDARG00000060682	7.83447	0.86559	0.740881	1.16832	0.242676	0.453103	23	13	11	11	15.856	9.20454	6.7295	7.03753	agr1	anterior gradient 1
ENSDARG00000070480	73.5019	-1.27416	0.268502	-4.74542	2.0807e-06	2.2764e-05	106	117	339	265	73.0754	82.8409	207.391	169.54	agr2	anterior gradient 2
ENSDARG00000079388	1672.64	0.446174	0.0874932	5.09953	3.40499e-07	4.27495e-06	4000	3723	3071	3252	2757.56	2636.04	1878.75	2080.55	agrn	agrin
ENSDARG00000069089	113.413	0.676768	0.206373	3.27935	0.00104047	0.00602831	205	210	147	143	141.325	148.689	89.9306	91.4879	agrp	agouti related neuropeptide
ENSDARG00000099781	383.631	-0.95654	0.153627	-6.2264	4.7729e-10	9.04436e-09	140	115	265	287	96.5147	81.4248	162.12	183.616	agrp2	agouti related neuropeptide 2
ENSDARG00000016412	25.8365	0.111265	0.493135	0.225628	0.821491	0.915829	44	37	23	60	30.3332	26.1975	14.0708	38.3865	agt	angiotensinogen
ENSDARG00000105214	80.4704	0.105893	0.244284	0.433485	0.664662	0.822299	203	158	213	162	139.946	111.871	130.308	103.644	agtpbp1	ATP/GTP binding protein 1
ENSDARG00000018616	29.177	0.833895	0.413852	2.01496	0.0439089	0.133274	48	59	30	37	33.0908	41.7745	18.3532	23.6717	agtr1a	angiotensin II receptor, type 1a
ENSDARG00000045443	4.66961	-0.752538	1.01136	-0.744084	0.456825	0.667668	3	5	5	10	2.06817	3.54021	3.05886	6.39775	agtr1b	angiotensin II receptor, type 1b
ENSDARG00000035552	36.5354	-1.67512	0.353579	-4.73761	2.16248e-06	2.35743e-05	43	71	217	191	29.6438	50.271	132.755	122.197	agtr2	angiotensin II receptor, type 2
ENSDARG00000077082	79.3413	-1.91655	0.284158	-6.74466	1.53382e-11	3.45053e-10	57	58	248	237	39.2953	41.0664	151.72	151.627	agtrap	angiotensin II receptor-associated protein
ENSDARG00000100709	65.1933	0.282561	0.661267	0.427302	0.669159	0.825219	6	6	3	8	4.13635	4.24825	1.83532	5.1182	agxt2	alanine--glyoxylate aminotransferase 2
ENSDARG00000052099	37.5641	1.32495	0.929293	1.42576	0.153939	0.334749	8	1	1	3	5.51513	0.708042	0.611773	1.91933	agxta	alanine-glyoxylate aminotransferase a
ENSDARG00000018478	1.54088	0.148497	2.1748	0.0682807	0.945562		2	0	1	1	1.37878	0	0.611773	0.639775	agxtb	alanine-glyoxylate aminotransferase b
ENSDARG00000077530	297.826	0.359867	0.158417	2.27164	0.0231082	0.0806501	699	671	655	539	481.884	475.096	400.711	344.839	ahctf1	AT hook containing transcription factor 1
ENSDARG00000005191	668.652	-1.31363	0.12056	-10.8961	1.20265e-27	8.3389e-26	734	712	2041	1973	506.013	504.126	1248.63	1262.28	ahcy	adenosylhomocysteinase
ENSDARG00000056331	1176.43	-0.272794	0.0944279	-2.88891	0.00386578	0.0186066	2054	2063	2927	2633	1416.01	1460.69	1790.66	1684.53	ahcyl1	adenosylhomocysteinase-like 1
ENSDARG00000039343	1673.16	0.207005	0.0696636	2.9715	0.0029635	0.0148286	2996	2835	2875	2766	2065.42	2007.3	1758.85	1769.62	ahcyl2	adenosylhomocysteinase-like 2
ENSDARG00000093453	111.801	0.427462	0.219679	1.94585	0.0516727	0.151167	204	264	191	198	140.636	186.923	116.849	126.676	ahdc1	AT hook, DNA binding motif, containing 1
ENSDARG00000044056	344.611	0.215581	0.1315	1.6394	0.101131	0.249451	433	514	472	440	298.506	363.933	288.757	281.501	ahi1	Abelson helper integration site 1
ENSDARG00000061764	486.828	-1.22585	0.1545	-7.93434	2.11618e-15	6.84744e-14	556	584	1488	1490	383.301	413.496	910.318	953.265	ahnak	AHNAK nucleoprotein
ENSDARG00000020046	0.959089	-1.13404	2.34	-0.484634	0.627936		0	2	4	1	0	1.41608	2.44709	0.639775	ahr1a	aryl hydrocarbon receptor 1a
ENSDARG00000023537	29.0029	-0.523882	0.380751	-1.37592	0.168847	0.356577	57	56	107	75	39.2953	39.6503	65.4597	47.9832	ahr1b	aryl hydrocarbon receptor 1b
ENSDARG00000021833	434.659	-0.272188	0.102852	-2.64639	0.00813552	0.0343635	761	740	1018	1006	524.627	523.951	622.785	643.614	ahr2	aryl hydrocarbon receptor 2
ENSDARG00000052618	1.11787	0.472005	2.00595	0.235303	0.813974		4	1	2	2	2.75756	0.708042	1.22355	1.27955	ahrrb	aryl-hydrocarbon receptor repressor b
ENSDARG00000028664	157.115	0.336501	0.210217	1.60073	0.109437	0.264622	113	110	90	107	77.9012	77.8846	55.0595	68.456	ahsa1a	AHA1, activator of heat shock protein ATPase homolog 1a
ENSDARG00000100317	2441.81	0.0124068	0.0637388	0.194651	0.845666	0.929137	4359	4109	4579	4788	3005.06	2909.34	2801.31	3063.24	ahsa1b	AHA1, activator of heat shock protein ATPase homolog 1b
ENSDARG00000026764	61.9806	-0.147428	0.293084	-0.503023	0.614948	0.788901	62	82	79	99	42.7422	58.0594	48.33	63.3378	ahsg1	alpha-2-HS-glycoprotein 1
ENSDARG00000069293	0.349833	3.935	4.5058	0.873318	0.38249		1	4	0	0	0.689391	2.83217	0	0	ahsg2	alpha-2-HS-glycoprotein 2
ENSDARG00000015734	1.98803	2.73958	1.96413	1.39481	0.163075		3	3	0	1	2.06817	2.12413	0	0.639775	aicda	activation-induced cytidine deaminase
ENSDARG00000014532	517.388	0.197749	0.118483	1.66901	0.0951157	0.238219	602	711	715	567	415.013	503.418	437.417	362.753	aida	axin interactor, dorsalization associated
ENSDARG00000009336	1266.06	-0.157162	0.0775397	-2.02686	0.0426769	0.130481	2240	2249	2757	2831	1544.24	1592.39	1686.66	1811.2	aif1l	allograft inflammatory factor 1-like
ENSDARG00000058088	649.536	-0.0468556	0.100069	-0.468232	0.639619	0.806386	841	745	874	953	579.778	527.491	534.689	609.706	aifm1	apoptosis-inducing factor, mitochondrion-associated 1
ENSDARG00000077549	572.318	-0.10702	0.113854	-0.939976	0.34723	0.568974	457	422	536	521	315.052	298.794	327.91	333.323	aifm2	apoptosis-inducing factor, mitochondrion-associated, 2
ENSDARG00000062780	38.4385	0.155432	0.458783	0.338792	0.734766	0.867061	24	13	17	20	16.5454	9.20454	10.4001	12.7955	aifm3	apoptosis inducing factor, mitochondria associated 3
ENSDARG00000061634	14.12	-2.70085	1.2422	-2.17424	0.0296868	0.098126	11	16	111	86	7.5833	11.3287	67.9068	55.0207	aifm4	apoptosis-inducing factor, mitochondrion-associated, 4
ENSDARG00000075551	1.97071	1.62266	1.47214	1.10225	0.270355		11	3	1	4	7.5833	2.12413	0.611773	2.5591	aifm5	apoptosis-inducing factor, mitochondrion-associated, 5
ENSDARG00000007171	215.74	0.130407	0.167655	0.777828	0.43667	0.650819	680	541	625	619	468.786	383.051	382.358	396.021	aig1	androgen-induced 1 (H. sapiens)
ENSDARG00000031782	95.8167	0.402263	0.278257	1.44565	0.148276	0.327058	220	171	168	162	151.666	121.075	102.778	103.644	aim1a	absent in melanoma 1a
ENSDARG00000006060	149.657	-0.0412208	0.209164	-0.197074	0.84377	0.928077	413	354	454	427	284.718	250.647	277.745	273.184	aim1b	absent in melanoma 1b
ENSDARG00000060036	433.677	-0.107735	0.139114	-0.774439	0.438671	0.652677	467	430	573	507	321.946	304.458	350.546	324.366	aimp1	aminoacyl tRNA synthetase complex-interacting multifunctional protein 1
ENSDARG00000018903	527.044	0.00755344	0.109381	0.0690561	0.944945	0.973903	849	667	844	838	585.293	472.264	516.336	536.132	aimp2	aminoacyl tRNA synthetase complex-interacting multifunctional protein 2
ENSDARG00000104437	1128.36	0.0371039	0.104856	0.353855	0.723448	0.860194	1491	1495	1610	1639	1027.88	1058.52	984.954	1048.59	aip	aryl hydrocarbon receptor interacting protein
ENSDARG00000075067	37.5972	-3.1324	0.370398	-8.45685	2.74708e-17	1.02385e-15	39	46	444	390	26.8862	32.5699	271.627	249.512	aipl1	aryl hydrocarbon receptor interacting protein-like 1
ENSDARG00000056784	6.65724	-0.284401	0.888764	-0.319996	0.748971	0.873683	7	4	10	5	4.82574	2.83217	6.11773	3.19888	aire	autoimmune regulator
ENSDARG00000077842	343.817	0.0158453	0.187642	0.0844445	0.932703	0.968625	114	90	104	121	78.5906	63.7238	63.6244	77.4128	ajuba	ajuba LIM protein
ENSDARG00000001950	1134.12	-0.194526	0.0868294	-2.24032	0.02507	0.0857945	1257	1146	1504	1564	866.564	811.416	920.106	1000.61	ak1	adenylate kinase 1
ENSDARG00000005926	1167.26	-0.511214	0.0948722	-5.38845	7.10692e-08	1.00847e-06	1200	1107	1813	1856	827.269	783.802	1109.14	1187.42	ak2	adenylate kinase 2
ENSDARG00000058226	896.142	-0.107347	0.11319	-0.948381	0.342935	0.565029	656	569	780	694	452.24	402.876	477.183	444.004	ak3	adenylate kinase 3
ENSDARG00000006546	1039.85	-0.326582	0.0833708	-3.91722	8.95762e-05	0.000695127	1212	1229	1839	1584	835.542	870.183	1125.05	1013.4	ak4	adenylate kinase 4
ENSDARG00000012555	2008.44	0.125549	0.0839464	1.49558	0.134763	0.305715	3794	3503	3781	3686	2615.55	2480.27	2313.11	2358.21	ak5	adenylate kinase 5
ENSDARG00000017739	147.901	0.17529	0.228595	0.766816	0.443191	0.656045	476	411	430	446	328.15	291.005	263.062	285.34	ak5l	adenylate kinase 5, like
ENSDARG00000019001	105.755	-0.540482	0.293755	-1.8399	0.0657822	0.181889	57	51	77	98	39.2953	36.1101	47.1065	62.698	ak7a	adenylate kinase 7a
ENSDARG00000017023	26.0676	-0.175372	0.511683	-0.342735	0.731798	0.864966	29	10	25	24	19.9923	7.08042	15.2943	15.3546	ak7b	adenylate kinase 7b
ENSDARG00000030961	85.3028	-0.964495	0.310532	-3.10594	0.00189675	0.0101905	27	29	59	63	18.6136	20.5332	36.0946	40.3058	ak8	adenylate kinase 8
ENSDARG00000059549	160.304	0.108032	0.167974	0.643148	0.520128	0.720775	221	267	251	255	152.355	189.047	153.555	163.143	akap10	A kinase (PRKA) anchor protein 10
ENSDARG00000075435	1740.7	0.183593	0.0694945	2.64183	0.00824589	0.034734	4249	4081	4097	4091	2929.22	2889.52	2506.43	2617.32	akap11	A kinase (PRKA) anchor protein 11
ENSDARG00000091792	19.502	0.0799986	0.442766	0.180679	0.856619	0.93541	47	56	57	52	32.4014	39.6503	34.871	33.2683	akap12a	A kinase (PRKA) anchor protein 12a
ENSDARG00000055678	915.87	-0.566462	0.0982903	-5.76315	8.25588e-09	1.32267e-07	927	930	1543	1528	639.065	658.479	943.965	977.577	akap12b	A kinase (PRKA) anchor protein 12b
ENSDARG00000023868	415.044	-0.407956	0.123645	-3.29943	0.00096882	0.00567008	555	584	792	894	382.612	413.496	484.524	571.959	akap13	A-kinase anchoring protein 13
ENSDARG00000104768	89.1689	0.028102	0.263999	0.106447	0.915228	0.961644	195	139	153	211	134.431	98.4178	93.6012	134.993	akap17a	A kinase (PRKA) anchor protein 17A
ENSDARG00000089802	3.72605	0.595294	0.990938	0.600737	0.548015	0.741163	13	14	11	9	8.96208	9.91259	6.7295	5.75798	akap1a	A kinase (PRKA) anchor protein 1a
ENSDARG00000006062	563.621	0.0650614	0.124384	0.523067	0.600927	0.780146	841	656	888	711	579.778	464.475	543.254	454.88	akap1b	A kinase (PRKA) anchor protein 1b
ENSDARG00000077295	444.425	0.388185	0.117573	3.30166	0.000961149	0.0056303	1234	1218	996	1094	850.708	862.395	609.326	699.914	akap6	A kinase (PRKA) anchor protein 6
ENSDARG00000043843	57.7513	-0.256041	0.257759	-0.993335	0.320547	0.541129	84	92	124	111	57.9088	65.1398	75.8598	71.0151	akap7	A kinase (PRKA) anchor protein 7
ENSDARG00000099635	525.17	0.408789	0.155082	2.63596	0.00838991	0.0352583	1271	1142	835	1186	876.216	808.584	510.83	758.774	akap8l	A kinase (PRKA) anchor protein 8-like
ENSDARG00000069037	79.6839	0.0628405	0.266278	0.235996	0.813436	0.911137	106	119	100	140	73.0754	84.257	61.1773	89.5686	akip1	A kinase (PRKA) interacting protein 1
ENSDARG00000039969	495.582	0.176405	0.12531	1.40775	0.159205	0.342602	785	749	720	794	541.172	530.323	440.476	507.982	akirin1	akirin 1
ENSDARG00000058729	468.783	0.0188157	0.108994	0.17263	0.862942	0.93771	839	768	875	895	578.399	543.776	535.301	572.599	akirin2	akirin 2
ENSDARG00000087110	85.607	-1.18682	0.373517	-3.17741	0.00148599	0.00822147	28	36	57	105	19.3029	25.4895	34.871	67.1764	akna	AT-hook transcription factor
ENSDARG00000035257	4.04202	-2.40997	1.0696	-2.25314	0.0242504	0.08372	1	5	24	12	0.689391	3.54021	14.6825	7.6773	akr1a1a	aldo-keto reductase family 1, member A1a (aldehyde reductase)
ENSDARG00000052030	276.331	-0.702634	0.153303	-4.5833	4.5769e-06	4.68124e-05	294	239	493	475	202.681	169.222	301.604	303.893	akr1a1b	aldo-keto reductase family 1, member A1b (aldehyde reductase)
ENSDARG00000006215	88.2697	-0.241455	0.232793	-1.03721	0.299639	0.518918	110	98	123	151	75.833	69.3881	75.248	96.6061	akr1b1	aldo-keto reductase family 1, member B1 (aldose reductase)
ENSDARG00000016649	524.669	-0.0877489	0.117764	-0.745127	0.456195	0.667113	464	404	566	465	319.877	286.049	346.263	297.496	akr7a3	aldo-keto reductase family 7, member A3 (aflatoxin aldehyde reductase)
ENSDARG00000099657	109.092	-0.12213	0.226963	-0.538106	0.590504	0.772484	117	78	132	105	80.6587	55.2273	80.754	67.1764	akt1	v-akt murine thymoma viral oncogene homolog 1
ENSDARG00000074667	3131.76	0.0991514	0.0631893	1.56912	0.116621	0.277252	5044	4744	5439	4774	3477.29	3358.95	3327.43	3054.29	akt1s1	AKT1 substrate 1 (proline-rich)
ENSDARG00000011219	637.643	-0.367927	0.119581	-3.0768	0.00209237	0.011107	805	745	1233	1004	554.96	527.491	754.316	642.334	akt2	v-akt murine thymoma viral oncogene homolog 2
ENSDARG00000103612	213.425	-1.28916	0.200252	-6.43771	1.21287e-10	2.45285e-09	69	66	171	197	47.568	46.7308	104.613	126.036	akt2l	v-akt murine thymoma viral oncogene homolog 2, like
ENSDARG00000104810	317.1	0.444084	0.136279	3.25864	0.00111948	0.00641641	535	504	440	413	368.824	356.853	269.18	264.227	akt3a	v-akt murine thymoma viral oncogene homolog 3a
ENSDARG00000087205	405.384	0.29096	0.128431	2.2655	0.0234823	0.0816489	671	667	635	587	462.581	472.264	388.476	375.548	akt3b	v-akt murine thymoma viral oncogene homolog 3b
ENSDARG00000026862	516.559	-0.208772	0.116574	-1.7909	0.0733089	0.19683	495	542	734	607	341.249	383.759	449.041	388.344	aktip	akt interacting protein
ENSDARG00000100372	317.175	-0.173014	0.167436	-1.03331	0.301459	0.520701	207	179	221	264	142.704	126.739	135.202	168.901	alad	aminolevulinate dehydratase
ENSDARG00000021059	4725.32	-0.998453	0.0533236	-18.7244	3.1306e-78	1.04464e-75	4008	3856	8795	8745	2763.08	2730.21	5380.54	5594.84	alas1	aminolevulinate, delta-, synthase 1
ENSDARG00000038643	38.5181	-0.919498	0.39605	-2.32167	0.0202505	0.0723315	69	34	114	103	47.568	24.0734	69.7421	65.8969	alas2	aminolevulinate, delta-, synthase 2
ENSDARG00000026531	2718.92	-0.210377	0.0556558	-3.77996	0.000156853	0.0011456	4680	4394	5951	5771	3226.35	3111.14	3640.66	3692.14	alcama	activated leukocyte cell adhesion molecule a
ENSDARG00000058538	204.123	0.602182	0.184044	3.27195	0.00106809	0.0061566	288	283	210	210	198.545	200.376	128.472	134.353	alcamb	activated leukocyte cell adhesion molecule b
ENSDARG00000037935	246.703	-0.361091	0.158968	-2.27147	0.0231185	0.0806731	169	173	261	230	116.507	122.491	159.673	147.148	aldh16a1	aldehyde dehydrogenase 16 family, member A1
ENSDARG00000099579	711.327	0.155017	0.101036	1.53427	0.124963	0.291027	567	579	629	522	390.885	409.956	384.805	333.963	aldh18a1	aldehyde dehydrogenase 18 family, member A1
ENSDARG00000053493	799.902	-0.911595	0.11928	-7.64249	2.13068e-14	6.31983e-13	247	247	564	475	170.28	174.886	345.04	303.893	aldh1a2	aldehyde dehydrogenase 1 family, member A2
ENSDARG00000076933	129.734	-1.19684	0.234133	-5.1118	3.19105e-07	4.01343e-06	109	139	304	331	75.1436	98.4178	185.979	211.766	aldh1a3	aldehyde dehydrogenase 1 family, member A3
ENSDARG00000077004	338.124	-1.10896	0.244858	-4.52899	5.92673e-06	5.94231e-05	29	36	103	54	19.9923	25.4895	63.0126	34.5479	aldh1l1	aldehyde dehydrogenase 1 family, member L1
ENSDARG00000070230	87.1028	-0.0866097	0.245843	-0.352297	0.724616	0.860849	133	106	139	144	91.689	75.0524	85.0364	92.1277	aldh1l2	aldehyde dehydrogenase 1 family, member L2
ENSDARG00000089924	823.025	-0.147392	0.109057	-1.35151	0.176533	0.36745	591	618	791	706	407.43	437.57	483.912	451.681	aldh2.1	aldehyde dehydrogenase 2 family (mitochondrial), tandem duplicate 1
ENSDARG00000028087	164.82	-0.721659	0.178561	-4.04152	5.31051e-05	0.000432867	112	109	206	201	77.2118	77.1766	126.025	128.595	aldh2.2	aldehyde dehydrogenase 2 family (mitochondrial), tandem duplicate 2
ENSDARG00000074791	96.7192	-0.445122	0.241401	-1.84391	0.0651962	0.180658	98	89	168	117	67.5603	63.0157	102.778	74.8537	aldh3a1	aldehyde dehydrogenase 3 family, member A1
ENSDARG00000028259	1213.56	0.0338591	0.0825187	0.41032	0.681571	0.833431	746	718	810	787	514.286	508.374	495.536	503.503	aldh3a2a	aldehyde dehydrogenase 3 family, member A2a
ENSDARG00000029381	98.2469	0.151334	0.234661	0.644906	0.518988	0.719895	97	87	95	90	66.8709	61.5996	58.1184	57.5798	aldh3a2b	aldehyde dehydrogenase 3 family, member A2b
ENSDARG00000013839	57.8379	-0.912732	0.328394	-2.77938	0.00544633	0.0247788	39	25	55	79	26.8862	17.701	33.6475	50.5423	aldh3b1	aldehyde dehydrogenase 3 family, member B1
ENSDARG00000035606	3.2502	0.62687	1.07407	0.583638	0.559464		9	9	6	7	6.20452	6.37238	3.67064	4.47843	aldh3b2	aldehyde dehydrogenase 3 family, member B2
ENSDARG00000038207	236.417	-0.38013	0.149169	-2.54831	0.0108246	0.0435923	214	184	286	292	147.53	130.28	174.967	186.814	aldh4a1	aldehyde dehydrogenase 4 family, member A1
ENSDARG00000076544	675.185	0.0999324	0.107	0.933951	0.350329	0.572077	595	486	585	541	410.188	344.108	357.887	346.118	aldh5a1	aldehyde dehydrogenase 5 family, member A1 (succinate-semialdehyde dehydrogenase)
ENSDARG00000053485	2054.34	-0.415421	0.0682604	-6.08583	1.15893e-09	2.11178e-08	1036	975	1523	1472	714.209	690.341	931.73	941.749	aldh6a1	aldehyde dehydrogenase 6 family, member A1
ENSDARG00000018426	1286.73	-9.09424e-05	0.08827	-0.00103027	0.999178	0.999766	849	961	997	1025	585.293	680.428	609.937	655.77	aldh7a1	aldehyde dehydrogenase 7 family, member A1
ENSDARG00000036776	74.612	-1.5507	0.267466	-5.79776	6.72047e-09	1.09142e-07	57	91	240	245	39.2953	64.4318	146.825	156.745	aldh8a1	aldehyde dehydrogenase 8 family, member A1
ENSDARG00000069100	1917.39	-0.0269314	0.073306	-0.367383	0.713333	0.85416	1568	1542	1860	1681	1080.97	1091.8	1137.9	1075.46	aldh9a1a.1	aldehyde dehydrogenase 9 family, member A1a, tandem duplicate 1
ENSDARG00000055331	75.1815	-0.0309558	0.297783	-0.103954	0.917206	0.962313	61	49	85	41	42.0528	34.694	52.0007	26.2308	aldh9a1a.2	aldehyde dehydrogenase 9 family, member A1a, tandem duplicate 2
ENSDARG00000037061	402.472	-0.0792685	0.147289	-0.538184	0.59045	0.77246	189	180	248	188	130.295	127.448	151.72	120.278	aldh9a1b	aldehyde dehydrogenase 9 family, member A1b
ENSDARG00000011665	6764.43	-0.265055	0.0627332	-4.22511	2.38827e-05	0.000211546	7454	7028	9942	9492	5138.72	4976.12	6082.24	6072.75	aldoaa	aldolase a, fructose-bisphosphate, a
ENSDARG00000034470	71.3046	-0.47001	0.250702	-1.87477	0.0608237	0.17123	79	80	125	121	54.4619	56.6433	76.4716	77.4128	aldoab	aldolase a, fructose-bisphosphate, b
ENSDARG00000053684	136.262	-0.196958	0.215333	-0.914669	0.360365	0.581661	185	127	210	189	127.537	89.9213	128.472	120.918	aldob	aldolase b, fructose-bisphosphate
ENSDARG00000057661	2521.29	-0.686292	0.0693559	-9.89523	4.36623e-23	2.39705e-21	2328	2189	4077	4037	1604.9	1549.9	2494.2	2582.77	aldoca	aldolase C, fructose-bisphosphate, a
ENSDARG00000019702	37714.5	0.0137286	0.0475699	0.288599	0.772888	0.887982	40795	39810	47259	41991	28123.7	28187.1	28911.8	26864.8	aldocb	aldolase C, fructose-bisphosphate, b
ENSDARG00000054963	133.075	0.461218	0.19268	2.39369	0.0166797	0.061896	210	154	153	142	144.772	109.038	93.6012	90.8481	alg1	ALG1, chitobiosyldiphosphodolichol beta-mannosyltransferase
ENSDARG00000053917	43.3784	-0.747556	0.400914	-1.86463	0.0622336	0.174245	29	21	59	35	19.9923	14.8689	36.0946	22.3921	alg10	asparagine-linked glycosylation 10
ENSDARG00000031202	488.559	-0.173706	0.139831	-1.24226	0.214141	0.417948	254	313	397	319	175.105	221.617	242.874	204.088	alg11	asparagine-linked glycosylation 11 (alpha-1,2-mannosyltransferase)
ENSDARG00000041199	156.74	-0.497919	0.190518	-2.6135	0.00896201	0.0373085	147	151	236	234	101.34	106.914	144.378	149.707	alg12	ALG12, alpha-1,6-mannosyltransferase
ENSDARG00000054374	4.78989	-0.98247	1.20069	-0.818254	0.413212	0.630623	2	3	4	7	1.37878	2.12413	2.44709	4.47843	alg13	ALG13, UDP-N-acetylglucosaminyltransferase subunit
ENSDARG00000103093	55.4288	0.0567179	0.335352	0.16913	0.865695	0.938997	48	37	39	52	33.0908	26.1975	23.8591	33.2683	alg14	ALG14, UDP-N-acetylglucosaminyltransferase subunit
ENSDARG00000070399	783.178	-1.09125	0.109839	-9.93496	2.9329e-23	1.62688e-21	362	319	829	791	249.56	225.865	507.16	506.062	alg2	asparagine-linked glycosylation 2 (alpha-1,3-mannosyltransferase)
ENSDARG00000053155	172.35	0.216343	0.231683	0.933789	0.350413	0.572083	142	216	148	196	97.8935	152.937	90.5424	125.396	alg3	asparagine-linked glycosylation 3 (alpha-1,3-mannosyltransferase)
ENSDARG00000061235	3709.71	-0.400683	0.0922785	-4.3421	1.41125e-05	0.000131783	535	522	778	780	368.824	369.598	475.959	499.025	alg5	asparagine-linked glycosylation 5 (dolichyl-phosphate beta-glucosyltransferase)
ENSDARG00000017617	145.569	-0.290042	0.214845	-1.35001	0.177014	0.36802	120	99	157	142	82.7269	70.0961	96.0483	90.8481	alg6	asparagine-linked glycosylation 6 (alpha-1,3,-glucosyltransferase)
ENSDARG00000044627	121.372	0.163456	0.203414	0.803567	0.421647	0.638196	120	132	112	139	82.7269	93.4615	68.5185	88.9288	alg8	ALG8, alpha-1,3-glucosyltransferase
ENSDARG00000012840	927.911	0.00686211	0.111494	0.0615467	0.950924	0.976859	1438	1492	1633	1624	991.344	1056.4	999.025	1039	alg9	ALG9, alpha-1,2-mannosyltransferase
ENSDARG00000095833	64.686	0.388103	0.279786	1.38714	0.165398	0.351711	214	203	186	170	147.53	143.732	113.79	108.762	alk	anaplastic lymphoma receptor tyrosine kinase
ENSDARG00000071164	74.3213	0.426232	0.262933	1.62107	0.105003	0.256451	94	96	82	76	64.8027	67.972	50.1654	48.6229	alkbh1	alkB homolog 1, histone H2A dioxygenase
ENSDARG00000059856	90.3027	-0.023677	0.27711	-0.0854425	0.93191	0.968555	118	133	140	145	81.3481	94.1696	85.6482	92.7674	alkbh2	alkB homolog 2, alpha-ketoglutarate-dependent dioxygenase
ENSDARG00000045606	52.7581	-0.0848581	0.304188	-0.278966	0.780271	0.891946	66	53	77	64	45.4998	37.5262	47.1065	40.9456	alkbh3	alkB homolog 3, alpha-ketoglutarate-dependent dioxygenase
ENSDARG00000097208	125.01	0.251162	0.220536	1.13887	0.254757	0.467968	295	246	252	255	203.37	174.178	154.167	163.143	alkbh3	alkB homolog 3, alpha-ketoglutarate-dependent dioxygenase
ENSDARG00000052247	71.1572	0.561092	0.25968	2.16071	0.030718	0.100677	125	117	88	95	86.1739	82.8409	53.836	60.7787	alkbh4	alkB homolog 4, lysine demthylase
ENSDARG00000063003	111.229	0.197308	0.193962	1.01725	0.309035	0.527558	183	182	162	193	126.159	128.864	99.1072	123.477	alkbh5	alkB homolog 5, RNA demethylase
ENSDARG00000077253	76.5758	-0.301529	0.25711	-1.17276	0.24089	0.451109	106	96	143	135	73.0754	67.972	87.4835	86.3697	alkbh6	alkB homolog 6
ENSDARG00000037906	72.7677	0.370438	0.288958	1.28198	0.199851	0.39821	88	88	75	77	60.6664	62.3077	45.883	49.2627	alkbh7	alkB homolog 7
ENSDARG00000060256	72.5565	0.335792	0.285657	1.17551	0.239792	0.449724	88	90	95	63	60.6664	63.7238	58.1184	40.3058	alkbh8	alkB homolog 8, tRNA methyltransferase
ENSDARG00000042562	3.87942	-1.86063	1.08039	-1.72219	0.0850346	0.219483	3	7	28	13	2.06817	4.95629	17.1296	8.31708	allc	allantoicase
ENSDARG00000074779	241.856	0.323543	0.152951	2.11534	0.034401	0.110392	368	464	422	323	253.696	328.531	258.168	206.647	alms1	Alstrom syndrome protein 1
ENSDARG00000069463	75.4668	-1.08702	0.241746	-4.49652	6.90741e-06	6.84206e-05	101	104	207	278	69.6285	73.6363	126.637	177.858	alox12	arachidonate 12-lipoxygenase
ENSDARG00000057273	44.5086	-1.4531	0.370025	-3.92703	8.60008e-05	0.000670059	42	73	163	189	28.9544	51.6871	99.719	120.918	alox5a	arachidonate 5-lipoxygenase a
ENSDARG00000054755	192.241	-1.23243	0.17041	-7.23211	4.75553e-13	1.24765e-11	261	225	608	665	179.931	159.309	371.958	425.451	alox5ap	arachidonate 5-lipoxygenase-activating protein
ENSDARG00000043085	2.12901	0.993098	1.47292	0.674236	0.500161		5	4	1	4	3.44695	2.83217	0.611773	2.5591	alox5b.1	arachidonate 5-lipoxygenase b, tandem duplicate 1
ENSDARG00000043089	26.2818	1.30185	0.43795	2.9726	0.00295285	0.0147925	58	35	20	22	39.9847	24.7815	12.2355	14.0751	alox5b.2	arachidonate 5-lipoxygenase b, tandem duplicate 2
ENSDARG00000069966	4.36181	0.593185	1.22768	0.483175	0.628972	0.799448	7	4	0	8	4.82574	2.83217	0	5.1182	alox5b.3	arachidonate 5-lipoxygenase b, tandem duplicate 3
ENSDARG00000098063	50.9374	-0.299898	0.33651	-0.891202	0.372821	0.592628	75	63	108	82	51.7043	44.6066	66.0715	52.4616	alp3	alkaline phosphatase 3
ENSDARG00000015273	10.669	-2.10629	0.635511	-3.31432	0.000918663	0.00541073	17	10	52	77	11.7196	7.08042	31.8122	49.2627	alpi.1	alkaline phosphatase, intestinal, tandem duplicate 1
ENSDARG00000053774	0.130436	-1.46288	6.66156	-0.2196	0.826183		1	0	0	3	0.689391	0	0	1.91933	alpi.2	alkaline phosphatase, intestinal, tandem duplicate 2
ENSDARG00000059741	71.2011	0.128176	0.302602	0.423578	0.671874	0.827291	54	72	68	61	37.2271	50.979	41.6005	39.0263	alpk1	alpha-kinase 1
ENSDARG00000078989	9.23927	-1.23051	0.80163	-1.53501	0.124782	0.2907	9	19	46	28	6.20452	13.4528	28.1415	17.9137	alpk3a	alpha-kinase 3a
ENSDARG00000105630	1.2336	1.74969	2.09494	0.835198	0.403606		1	8	1	2	0.689391	5.66433	0.611773	1.27955	alpk3b	alpha-kinase 3b
ENSDARG00000015546	196.941	-1.07813	0.186176	-5.79093	6.99963e-09	1.1359e-07	187	206	519	410	128.916	145.857	317.51	262.308	alpl	alkaline phosphatase, liver/bone/kidney
ENSDARG00000075111	147.353	0.402797	0.192418	2.09334	0.0363187	0.115095	278	306	261	233	191.651	216.661	159.673	149.068	als2a	amyotrophic lateral sclerosis 2a (juvenile)
ENSDARG00000076924	182.875	0.55856	0.145396	3.84164	0.000122214	0.000915146	540	603	459	409	372.271	426.949	280.804	261.668	als2b	amyotrophic lateral sclerosis 2b (juvenile)
ENSDARG00000062824	1.25663	0.902842	1.95766	0.461185	0.644666		5	0	3	0	3.44695	0	1.83532	0	alx1	ALX homeobox 1
ENSDARG00000091086	17.6952	-0.994681	0.469659	-2.11788	0.0341851	0.109767	35	29	64	78	24.1287	20.5332	39.1535	49.9025	alx3	ALX homeobox 3
ENSDARG00000088332	9.30931	-0.122002	0.597548	-0.20417	0.83822	0.925453	23	28	30	32	15.856	19.8252	18.3532	20.4728	alx4a	ALX homeobox 4a
ENSDARG00000077732	241.963	0.327607	0.149532	2.19088	0.0284602	0.0948645	472	529	410	480	325.393	374.554	250.827	307.092	alyref	Aly/REF export factor
ENSDARG00000057435	40.2879	0.490321	0.4271	1.14802	0.250959	0.462947	40	44	40	27	27.5756	31.1538	24.4709	17.2739	amacr	alpha-methylacyl-CoA racemase
ENSDARG00000004296	0.974938	0.145598	2.80503	0.0519061	0.958603		1	0	0	1	0.689391	0	0	0.639775	ambp	alpha-1-microglobulin/bikunin precursor
ENSDARG00000008322	246.915	0.24811	0.135968	1.82477	0.0680362	0.186639	416	392	396	364	286.787	277.552	242.262	232.878	ambra1a	autophagy/beclin-1 regulator 1a
ENSDARG00000039878	192.989	0.457072	0.17138	2.66701	0.0076529	0.0326805	472	450	409	342	325.393	318.619	250.215	218.803	ambra1b	autophagy/beclin-1 regulator 1b
ENSDARG00000043856	1131.91	0.443124	0.0706972	6.26792	3.65905e-10	7.02723e-09	3372	3302	2772	2710	2324.63	2337.95	1695.83	1733.79	amd1	adenosylmethionine decarboxylase 1
ENSDARG00000100376	337.35	-1.34416	0.145962	-9.20894	3.2936e-20	1.53242e-18	180	189	516	530	124.09	133.82	315.675	339.081	amdhd2	amidohydrolase domain containing 2
ENSDARG00000079624	149.114	-0.522015	0.264831	-1.97113	0.0487094	0.144297	111	188	247	234	76.5224	133.112	151.108	149.707	amer1	APC membrane recruitment protein 1
ENSDARG00000075222	1122.61	0.125087	0.0762188	1.64116	0.100764	0.248948	1968	1848	2069	1841	1356.72	1308.46	1265.76	1177.83	amer2	APC membrane recruitment protein 2
ENSDARG00000020218	1011.28	0.126025	0.0960135	1.31258	0.189325	0.384567	1255	1295	1314	1296	865.186	916.914	803.869	829.149	amfr	autocrine motility factor receptor, E3 ubiquitin protein ligase a
ENSDARG00000105578	59.1086	-1.25308	1.00729	-1.244	0.213499	0.416925	0	3	6	2	0	2.12413	3.67064	1.27955	amfrb	autocrine motility factor receptor, E3 ubiquitin protein ligase b
ENSDARG00000014357	5.54594	0.620854	0.810792	0.765737	0.443833	0.65644	23	25	21	14	15.856	17.701	12.8472	8.95686	amh	anti-Mullerian hormone
ENSDARG00000079620	248.354	0.0518068	0.16213	0.31954	0.749317	0.873744	612	556	694	566	421.907	393.671	424.57	362.113	amigo1	adhesion molecule with Ig-like domain 1
ENSDARG00000074469	307.988	0.925943	0.135734	6.82177	8.99266e-12	2.08974e-10	778	764	447	459	536.346	540.944	273.462	293.657	amigo3	adhesion molecule with Ig-like domain 3
ENSDARG00000012892	89.98	0.042437	0.244318	0.173696	0.862105	0.937381	155	217	200	204	106.856	153.645	122.355	130.514	ammecr1	Alport syndrome, mental retardation, midface hypoplasia and elliptocytosis chromosomal region gene 1 homolog (human)
ENSDARG00000070478	277.46	0.295379	0.1442	2.0484	0.0405209	0.125488	506	468	417	468	348.832	331.364	255.109	299.415	amn1	antagonist of mitotic exit network 1 homolog (S. cerevisiae)
ENSDARG00000078335	183.466	-0.233695	0.213253	-1.09586	0.273142	0.490165	74	85	110	99	51.0149	60.1836	67.295	63.3378	amot	angiomotin
ENSDARG00000019442	34.8646	0.17943	0.386964	0.463687	0.642872	0.808467	41	55	54	41	28.265	38.9423	33.0357	26.2308	amotl1	angiomotin like 1
ENSDARG00000061923	771.995	0.0342529	0.111121	0.30825	0.757892	0.878729	781	897	913	918	538.414	635.113	558.548	587.314	amotl2a	angiomotin like 2a
ENSDARG00000061948	580.832	-1.27781	0.133609	-9.56375	1.1356e-21	5.78805e-20	127	178	431	396	87.5527	126.031	263.674	253.351	amotl2b	angiomotin like 2b
ENSDARG00000033832	79.3394	-0.210374	0.231481	-0.908817	0.363447	0.583855	155	170	208	212	106.856	120.367	127.249	135.632	ampd1	adenosine monophosphate deaminase 1 (isoform M)
ENSDARG00000104491	1023.68	0.045046	0.111294	0.404746	0.685664	0.835629	661	647	722	694	455.687	458.103	441.7	444.004	ampd2a	adenosine monophosphate deaminase 2a
ENSDARG00000029952	199.901	0.291071	0.156977	1.85422	0.0637072	0.17743	521	500	450	481	359.173	354.021	275.298	307.732	ampd2b	adenosine monophosphate deaminase 2b
ENSDARG00000005800	10.0584	-2.39915	0.734	-3.2686	0.00108081	0.00622486	21	7	80	84	14.4772	4.95629	48.9418	53.7411	ampd3a	adenosine monophosphate deaminase 3a
ENSDARG00000032469	130.39	-1.54803	0.211591	-7.31611	2.55266e-13	6.85717e-12	132	103	424	344	90.9996	72.9283	259.392	220.083	ampd3b	adenosine monophosphate deaminase 3b
ENSDARG00000007663	1160.34	0.373898	0.0915885	4.08237	4.45788e-05	0.000370726	2956	2718	2731	2167	2037.84	1924.46	1670.75	1386.39	amph	amphiphysin
ENSDARG00000010862	185.328	-0.622098	0.272269	-2.28487	0.0223206	0.0784915	31	33	54	56	21.3711	23.3654	33.0357	35.8274	amt	aminomethyltransferase
ENSDARG00000013856	12.7767	-0.162966	1.11038	-0.146766	0.883316	0.947404	3	1	3	2	2.06817	0.708042	1.83532	1.27955	amy2a	amylase, alpha 2A (pancreatic)
ENSDARG00000075687	197.906	0.113839	0.178125	0.639099	0.522758	0.722544	358	324	369	335	246.802	229.406	225.744	214.325	anapc1	anaphase promoting complex subunit 1
ENSDARG00000090152	113.508	-0.457102	0.212207	-2.15404	0.0312373	0.101941	89	97	135	150	61.3558	68.6801	82.5893	95.9663	anapc10	anaphase promoting complex subunit 10
ENSDARG00000102531	271.233	0.109956	0.147568	0.745126	0.456196	0.667113	336	400	375	387	231.635	283.217	229.415	247.593	anapc11	APC11 anaphase promoting complex subunit 11 homolog (yeast)
ENSDARG00000078435	230.04	-0.0122804	0.166826	-0.0736121	0.941319	0.972075	332	362	365	416	228.878	256.311	223.297	266.147	anapc13	anaphase promoting complex subunit 13
ENSDARG00000101285	304.628	0.112297	0.147968	0.758924	0.447898	0.659939	543	587	535	631	374.339	415.621	327.298	403.698	anapc15	anaphase promoting complex subunit 15
ENSDARG00000013822	419.137	-0.206235	0.129778	-1.58913	0.112031	0.268978	423	495	606	578	291.612	350.481	370.734	369.79	anapc16	anaphase promoting complex subunit 16
ENSDARG00000105035	139.675	-0.0766037	0.205895	-0.372052	0.709854	0.851754	190	207	272	197	130.984	146.565	166.402	126.036	anapc2	anaphase promoting complex subunit 2
ENSDARG00000032237	90.9578	0.547075	0.26659	2.05212	0.0401577	0.124562	120	105	91	81	82.7269	74.3444	55.6713	51.8218	anapc4	anaphase promoting complex subunit 4
ENSDARG00000008461	165.575	0.127735	0.202818	0.629804	0.528823	0.727161	197	127	182	149	135.81	89.9213	111.343	95.3265	anapc5	anaphase promoting complex subunit 5
ENSDARG00000063005	72.5327	0.351669	0.250957	1.40131	0.161121	0.345471	124	126	116	103	85.4845	89.2133	70.9656	65.8969	anapc7	anaphase promoting complex subunit 7
ENSDARG00000088514	30.3531	-0.232418	0.409349	-0.567776	0.570187	0.757742	33	34	47	41	22.7499	24.0734	28.7533	26.2308	and1	actinodin1
ENSDARG00000079302	0.760111	3.17113	3.0335	1.04537	0.295852		3	0	0	0	2.06817	0	0	0	and2	actinodin2
ENSDARG00000056873	0.714001	-1.29448	2.91192	-0.444544	0.656649		0	0	0	1	0	0	0	0.639775	and3	actinodin3
ENSDARG00000077567	301.496	-0.335364	0.182263	-1.84	0.0657688	0.181889	126	158	218	183	86.8633	111.871	133.366	117.079	angel1	angel homolog 1 (Drosophila)
ENSDARG00000016743	259.96	0.372309	0.140798	2.64428	0.0081865	0.0345175	429	398	383	331	295.749	281.801	234.309	211.766	angel2	angel homolog 2 (Drosophila)
ENSDARG00000030364	393.03	-0.674484	0.237158	-2.84402	0.00445478	0.0209459	37	32	64	59	25.5075	22.6573	39.1535	37.7467	angpt1	angiopoietin 1
ENSDARG00000014946	10.0493	-1.93341	0.660155	-2.92873	0.00340355	0.0166711	8	10	43	34	5.51513	7.08042	26.3062	21.7524	angpt2a	angiopoietin 2a
ENSDARG00000053906	28.0333	-0.0116278	0.403386	-0.0288256	0.977004	0.988854	42	45	50	48	28.9544	31.8619	30.5886	30.7092	angpt2b	angiopoietin 2b
ENSDARG00000076787	48.7129	-0.500061	0.444418	-1.12521	0.260502	0.475027	17	11	13	31	11.7196	7.78846	7.95305	19.833	angpt4	angiopoietin 4
ENSDARG00000012071	113.589	-1.33001	0.251706	-5.28398	1.2641e-07	1.72941e-06	80	56	212	170	55.1513	39.6503	129.696	108.762	angptl1a	angiopoietin-like 1a
ENSDARG00000100159	1.79508	0.153448	1.67372	0.091681	0.926951		3	9	3	9	2.06817	6.37238	1.83532	5.75798	angptl1b	angiopoietin-like 1b
ENSDARG00000024030	7.77313	-0.0923649	0.711412	-0.129833	0.896698	0.953443	17	18	30	12	11.7196	12.7448	18.3532	7.6773	angptl2a	angiopoietin-like 2a
ENSDARG00000068369	29.924	0.387973	0.372991	1.04017	0.298262	0.517517	88	77	79	62	60.6664	54.5192	48.33	39.6661	angptl2b	angiopoietin-like 2b
ENSDARG00000044365	310.722	-0.561869	0.148736	-3.77763	0.000158329	0.0011552	365	314	604	516	251.628	222.325	369.511	330.124	angptl3	angiopoietin-like 3
ENSDARG00000035859	8858.3	-0.158334	0.0540721	-2.9282	0.00340927	0.0166954	2943	2661	3693	3294	2028.88	1884.1	2259.28	2107.42	angptl4	angiopoietin-like 4
ENSDARG00000056630	39.9038	0.449098	0.413291	1.08664	0.277196	0.493893	56	81	48	64	38.6059	57.3514	29.3651	40.9456	angptl5	angiopoietin-like 5
ENSDARG00000020265	0.370785	0.159296	4.61673	0.0345041	0.972475		0	0	0	0	0	0	0	0	angptl6	angiopoietin-like 6
ENSDARG00000027582	242.886	-0.141416	0.146117	-0.967823	0.333133	0.554914	1084	1025	1310	1287	747.3	725.743	801.422	823.391	angptl7	angiopoietin-like 7
ENSDARG00000059093	294.977	0.809995	0.154232	5.25181	1.5061e-07	2.03443e-06	570	518	358	335	392.953	366.766	219.015	214.325	ank1a	ankyrin 1, erythrocytic a
ENSDARG00000092143	44.8328	1.26784	0.307162	4.1276	3.66569e-05	0.000311518	148	148	60	77	102.03	104.79	36.7064	49.2627	ank1a	ankyrin 1, erythrocytic a
ENSDARG00000074777	360.543	0.771926	0.154164	5.00719	5.52314e-07	6.70183e-06	969	988	669	612	668.02	699.545	409.276	391.543	ank1b	ankyrin 1, erythrocytic b
ENSDARG00000009026	585.499	0.330154	0.105862	3.11873	0.00181631	0.00980516	1630	1525	1500	1305	1123.71	1079.76	917.659	834.907	ank2a	ankyrin 2a, neuronal
ENSDARG00000043313	2901.75	0.44601	0.0941055	4.73947	2.14278e-06	2.33714e-05	8038	8061	6983	6229	5541.32	5707.52	4272.01	3985.16	ank2b	ankyrin 2b, neuronal
ENSDARG00000061736	1204.5	0.714884	0.0821347	8.7038	3.20953e-18	1.26696e-16	4117	4258	2934	2768	2838.22	3014.84	1794.94	1770.9	ank3a	ankyrin 3a
ENSDARG00000077582	856.981	0.555847	0.0909995	6.10824	1.00733e-09	1.85934e-08	1380	1335	1091	973	951.36	945.236	667.444	622.501	ank3b	ankyrin 3b
ENSDARG00000000516	9.40361	-0.267279	0.681543	-0.392167	0.694934	0.841423	14	7	9	19	9.65147	4.95629	5.50595	12.1557	ankar	ankyrin and armadillo repeat containing
ENSDARG00000098647	71.7407	0.576435	0.244069	2.36177	0.018188	0.066454	187	199	140	149	128.916	140.9	85.6482	95.3265	ankdd1a	ankyrin repeat and death domain containing 1A
ENSDARG00000025866	5.29768	0.636564	1.09909	0.579172	0.562473	0.751935	4	7	7	1	2.75756	4.95629	4.28241	0.639775	ankdd1b	ankyrin repeat and death domain containing 1B
ENSDARG00000019135	25.2274	-1.43077	0.771915	-1.85353	0.0638069	0.177638	1	6	5	16	0.689391	4.24825	3.05886	10.2364	ankef1a	ankyrin repeat and EF-hand domain containing 1a
ENSDARG00000060211	15.2202	0.370313	0.605244	0.611842	0.540643	0.736444	31	14	28	11	21.3711	9.91259	17.1296	7.03753	ankef1b	ankyrin repeat and EF-hand domain containing 1b
ENSDARG00000061013	122.084	0.251976	0.203713	1.23692	0.216117	0.420369	252	207	216	214	173.727	146.565	132.143	136.912	ankfy1	ankyrin repeat and FYVE domain containing 1
ENSDARG00000071724	67.7167	-0.521926	0.288738	-1.80761	0.0706672	0.191786	85	88	155	123	58.5982	62.3077	94.8248	78.6924	ankha	ANKH inorganic pyrophosphate transport regulator a
ENSDARG00000014969	689.494	-0.00214233	0.0938354	-0.0228307	0.981785	0.99082	1116	1112	1288	1205	769.36	787.342	787.963	770.929	ankhb	ANKH inorganic pyrophosphate transport regulator b
ENSDARG00000077860	566.604	0.2033	0.101873	1.99563	0.0459746	0.138014	947	905	875	920	652.853	640.778	535.301	588.593	ankhd1	ankyrin repeat and KH domain containing 1
ENSDARG00000060768	437.06	0.211271	0.1272	1.66093	0.0967266	0.241376	474	402	445	400	326.771	284.633	272.239	255.91	ankib1a	ankyrin repeat and IBR domain containing 1a
ENSDARG00000076829	525.448	0.46424	0.131332	3.53485	0.000408002	0.00265245	890	989	875	651	613.558	700.253	535.301	416.494	ankib1b	ankyrin repeat and IBR domain containing 1b
ENSDARG00000056921	1.49051	-0.86038	1.8278	-0.470719	0.637841		4	2	3	9	2.75756	1.41608	1.83532	5.75798	ankk1	ankyrin repeat and kinase domain containing 1
ENSDARG00000035607	227.287	0.305033	0.177224	1.72117	0.0852204	0.219829	382	442	418	329	263.347	312.954	255.721	210.486	ankle2	ankyrin repeat and LEM domain containing 2
ENSDARG00000062702	34.4586	-0.48843	0.360432	-1.35512	0.175378	0.365759	44	41	63	70	30.3332	29.0297	38.5417	44.7843	ankmy1	ankyrin repeat and MYND domain containing 1
ENSDARG00000005948	140.198	0.215208	0.207903	1.03514	0.300605	0.519933	259	197	219	219	178.552	139.484	133.978	140.111	ankmy2a	ankyrin repeat and MYND domain containing 2a
ENSDARG00000035399	370.612	0.0146816	0.132382	0.110903	0.911693	0.960349	537	410	542	504	370.203	290.297	331.581	322.447	ankra2	ankyrin repeat, family A (RFXANK-like), 2
ENSDARG00000037100	118.222	0.306337	0.199958	1.532	0.125521	0.291794	242	209	235	173	166.833	147.981	143.767	110.681	ankrd10a	ankyrin repeat domain 10a
ENSDARG00000004771	687.201	0.237291	0.0871207	2.7237	0.00645545	0.028443	1163	1116	1096	1063	801.762	790.175	670.503	680.081	ankrd10b	ankyrin repeat domain 10b
ENSDARG00000051886	2921.32	0.33595	0.0573501	5.85787	4.68838e-09	7.77369e-08	5947	5797	5201	5187	4099.81	4104.52	3181.83	3318.51	ankrd11	ankyrin repeat domain 11
ENSDARG00000052419	2433.25	0.608182	0.0589075	10.3244	5.4678e-25	3.39449e-23	5505	5707	4217	4002	3795.1	4040.79	2579.85	2560.38	ankrd12	ankyrin repeat domain 12
ENSDARG00000061901	133.336	0.24354	0.185768	1.31099	0.18986	0.385259	199	235	215	195	137.189	166.39	131.531	124.756	ankrd13a	ankyrin repeat domain 13A
ENSDARG00000014652	87.3918	-0.145997	0.211289	-0.690981	0.489577	0.695652	204	158	232	215	140.636	111.871	141.931	137.552	ankrd13b	ankyrin repeat domain 13B
ENSDARG00000103831	748.89	0.0739813	0.0802326	0.922084	0.356485	0.578063	1238	1211	1308	1290	853.466	857.439	800.199	825.31	ankrd13c	ankyrin repeat domain 13C
ENSDARG00000098140	454.537	-0.10349	0.120497	-0.858865	0.390415	0.609392	765	743	937	873	527.384	526.075	573.231	558.524	ankrd13d	ankyrin repeat domain 13 family, member D
ENSDARG00000003822	64.9803	0.454259	0.286616	1.5849	0.112988	0.270786	110	108	68	109	75.833	76.4685	41.6005	69.7355	ankrd16	ankyrin repeat domain 16
ENSDARG00000075263	9.54307	-1.27521	0.67477	-1.88984	0.0587796	0.16664	12	8	28	26	8.27269	5.66433	17.1296	16.6342	ankrd1a	ankyrin repeat domain 1a (cardiac muscle)
ENSDARG00000076192	6.62777	0.280229	0.880423	0.318289	0.750266	0.874358	6	6	4	7	4.13635	4.24825	2.44709	4.47843	ankrd1b	ankyrin repeat domain 1b (cardiac muscle)
ENSDARG00000002722	0.104341	3.18078	6.6636	0.477337	0.633122		2	1	0	0	1.37878	0.708042	0	0	ankrd2	ankyrin repeat domain 2 (stretch responsive muscle)
ENSDARG00000002298	46.7463	-0.638136	0.282959	-2.25522	0.0241195	0.0834028	117	106	185	202	80.6587	75.0524	113.178	129.235	ankrd22	ankyrin repeat domain 22
ENSDARG00000062103	66.4748	-0.620606	0.322782	-1.92268	0.0545204	0.157131	47	89	112	122	32.4014	63.0157	68.5185	78.0526	ankrd24	ankyrin repeat domain 24
ENSDARG00000089207	109.518	-0.195927	0.227937	-0.859565	0.390029	0.609012	137	129	166	174	94.4466	91.3374	101.554	111.321	ankrd27	ankyrin repeat domain 27 (VPS9 domain)
ENSDARG00000009023	516.277	0.14115	0.110236	1.28044	0.200391	0.399026	771	831	847	777	531.52	588.383	518.171	497.105	ankrd28b	ankyrin repeat domain 28b
ENSDARG00000057159	194.677	0.57866	0.15847	3.65155	0.000260663	0.00178936	603	539	474	381	415.703	381.635	289.98	243.754	ankrd29	ankyrin repeat domain 29
ENSDARG00000052731	0.152947	-1.27338	6.76551	-0.188216	0.850707		0	0	1	0	0	0	0.611773	0	ankrd31	ankyrin repeat domain 31
ENSDARG00000055638	6.41205	-2.49315	0.851204	-2.92898	0.0034008	0.0166622	9	6	44	50	6.20452	4.24825	26.918	31.9888	ankrd33aa	ankyrin repeat domain 33Aa
ENSDARG00000002508	23.3102	-2.60616	0.447678	-5.8215	5.83235e-09	9.53719e-08	29	33	241	182	19.9923	23.3654	147.437	116.439	ankrd33ab	ankyrin repeat domain 33Ab
ENSDARG00000015589	5.79176	-1.00814	0.827578	-1.21819	0.223153	0.429268	10	6	22	14	6.89391	4.24825	13.459	8.95686	ankrd33bb	ankyrin repeat domain 33Bb
ENSDARG00000076719	362.08	-0.0950215	0.132814	-0.715448	0.474332	0.683387	767	940	1066	974	528.763	665.559	652.15	623.141	ankrd34a	ankyrin repeat domain 34A
ENSDARG00000077086	22.8426	-0.31156	0.457134	-0.68155	0.495523	0.701417	42	42	47	69	28.9544	29.7378	28.7533	44.1445	ankrd34ba	ankyrin repeat domain 34Ba
ENSDARG00000061641	163.524	-0.440848	0.198218	-2.22406	0.0261445	0.088696	333	406	552	569	229.567	287.465	337.699	364.032	ankrd34bb	ankyrin repeat domain 34Bb
ENSDARG00000093286	231.41	-0.0106294	0.533332	-0.0199303	0.984099	0.991949	655	594	702	702	451.551	420.577	429.464	449.122	ankrd34c	ankyrin repeat domain 34C
ENSDARG00000056376	52.4278	-0.0954538	0.315517	-0.302532	0.762247	0.881876	77	108	108	113	53.0831	76.4685	66.0715	72.2946	ankrd37	ankyrin repeat domain 37
ENSDARG00000041350	62.5945	-0.31248	0.317232	-0.985022	0.324613	0.545317	85	59	90	109	58.5982	41.7745	55.0595	69.7355	ankrd39	ankyrin repeat domain 39
ENSDARG00000076490	652.78	-0.0330204	0.110122	-0.299853	0.764289	0.883502	612	596	691	689	421.907	421.993	422.735	440.805	ankrd40	ankyrin repeat domain 40
ENSDARG00000026028	307.467	-0.233508	0.119635	-1.95183	0.0509585	0.149549	571	557	807	676	393.642	394.379	493.701	432.488	ankrd44	ankyrin repeat domain 44
ENSDARG00000011326	31.8318	-0.418977	0.364998	-1.14789	0.251014	0.462947	55	43	69	77	37.9165	30.4458	42.2123	49.2627	ankrd45	ankyrin repeat domain 45
ENSDARG00000044328	177.422	0.295426	0.167034	1.76866	0.0769508	0.2041	197	226	188	197	135.81	160.017	115.013	126.036	ankrd46a	ankyrin repeat domain 46a
ENSDARG00000015780	607.014	-0.100607	0.0868093	-1.15895	0.246478	0.457868	1152	1162	1396	1375	794.178	822.745	854.035	879.691	ankrd46b	ankyrin repeat domain 46b
ENSDARG00000023508	105.054	-0.0968791	0.266239	-0.36388	0.715948	0.85555	158	154	199	174	108.924	109.038	121.743	111.321	ankrd49	ankyrin repeat domain 49
ENSDARG00000036826	111.519	0.362668	0.206707	1.7545	0.0793448	0.208347	281	231	217	227	193.719	163.558	132.755	145.229	ankrd52a	ankyrin repeat domain 52a
ENSDARG00000063576	18.8003	-0.695786	0.642425	-1.08306	0.278781	0.495514	12	4	20	9	8.27269	2.83217	12.2355	5.75798	ankrd52b	ankyrin repeat domain 52b
ENSDARG00000055743	113.279	0.0278942	0.211208	0.13207	0.894929	0.952438	213	178	189	238	146.84	126.031	115.625	152.267	ankrd54	ankyrin repeat domain 54
ENSDARG00000099182	152.709	0.314992	0.178744	1.76225	0.0780269	0.206022	494	466	393	467	340.559	329.947	240.427	298.775	ankrd55	ankyrin repeat domain 55
ENSDARG00000090489	2.99725	-3.86152	1.91874	-2.01253	0.0441636		0	0	4	2	0	0	2.44709	1.27955	ankrd66	ankyrin repeat domain 66
ENSDARG00000057790	0.51369	-0.856956	3.53214	-0.242617	0.808302		0	1	0	2	0	0.708042	0	1.27955	ankrd6a	ankyrin repeat domain 6a
ENSDARG00000029370	203.504	0.0256537	0.244866	0.104766	0.916561	0.962155	54	58	67	56	37.2271	41.0664	40.9888	35.8274	ankrd6b	ankyrin repeat domain 6b
ENSDARG00000028804	70.2758	-0.102093	0.249768	-0.408753	0.682721	0.834026	108	97	136	110	74.4542	68.6801	83.2011	70.3753	ankrd9	ankyrin repeat domain 9
ENSDARG00000078901	23.6187	-0.307553	0.509383	-0.603776	0.545992	0.739955	42	68	91	62	28.9544	48.1468	55.6713	39.6661	anks1ab	ankyrin repeat and sterile alpha motif domain containing 1Ab
ENSDARG00000003512	1543.18	0.301698	0.0714234	4.22408	2.39918e-05	0.000212249	3934	4007	3712	3487	2712.06	2837.12	2270.9	2230.9	anks1b	ankyrin repeat and sterile alpha motif domain containing 1B
ENSDARG00000038557	169.776	0.144194	0.204769	0.704177	0.481322	0.68881	105	113	137	84	72.3861	80.0087	83.8129	53.7411	anks3	ankyrin repeat and sterile alpha motif domain containing 3
ENSDARG00000036846	353.282	-0.17149	0.211245	-0.81181	0.416901	0.63423	63	58	65	87	43.4316	41.0664	39.7652	55.6605	anks4b	ankyrin repeat and sterile alpha motif domain containing 4B
ENSDARG00000041904	277.304	-0.378525	0.133432	-2.83684	0.00455619	0.0213382	389	316	558	466	268.173	223.741	341.369	298.135	ankzf1	ankyrin repeat and zinc finger domain containing 1
ENSDARG00000060917	104.325	-0.360513	0.254822	-1.41476	0.157138	0.339352	98	93	114	159	67.5603	65.8479	69.7421	101.724	anln	anillin, actin binding protein
ENSDARG00000102335	400.626	0.407437	0.129553	3.14494	0.00166123	0.0090665	861	974	855	694	593.566	689.633	523.066	444.004	ano1	anoctamin 1, calcium activated chloride channel
ENSDARG00000057736	257.648	-0.432088	0.16574	-2.60702	0.00913345	0.0378599	310	303	506	419	213.711	214.537	309.557	268.066	ano10a	anoctamin 10a
ENSDARG00000018159	189.956	-0.408655	0.201857	-2.02448	0.0429204	0.131019	121	194	266	203	83.4163	137.36	162.732	129.874	ano10b	anoctamin 10b
ENSDARG00000101363	166.638	-0.265032	0.173303	-1.5293	0.126191	0.292863	359	375	543	444	247.491	265.516	332.193	284.06	ano2	anoctamin 2
ENSDARG00000058015	213.229	0.393276	0.166187	2.36646	0.017959	0.0657862	566	524	482	445	390.195	371.014	294.874	284.7	ano3	anoctamin 3
ENSDARG00000015731	37.4853	0.162501	0.37371	0.434831	0.663685	0.821804	37	36	43	30	25.5075	25.4895	26.3062	19.1933	ano5a	anoctamin 5a
ENSDARG00000036147	241.855	-0.224896	0.180034	-1.24919	0.211597	0.414259	513	469	747	538	353.658	332.072	456.994	344.199	ano5b	anoctamin 5b
ENSDARG00000061544	31.2691	-1.79829	0.450051	-3.99574	6.44918e-05	0.000517	13	21	59	73	8.96208	14.8689	36.0946	46.7036	ano6	anoctamin 6
ENSDARG00000076265	154.714	-0.563315	0.192649	-2.92404	0.0034552	0.0168777	197	227	430	273	135.81	160.725	263.062	174.659	ano8a	anoctamin 8a
ENSDARG00000077229	87.1104	0.581783	0.300747	1.93446	0.0530568	0.154035	98	119	79	83	67.5603	84.257	48.33	53.1014	ano8b	anoctamin 8b
ENSDARG00000079324	13.7476	0.523087	0.551567	0.948365	0.342944	0.565029	34	47	30	33	23.4393	33.278	18.3532	21.1126	ano9b	anoctamin 9b
ENSDARG00000012896	174.913	0.317677	0.16337	1.94453	0.0518315	0.151466	420	342	371	312	289.544	242.15	226.968	199.61	anos1a	anosmin 1a
ENSDARG00000004932	75.4624	-0.038151	0.272637	-0.139933	0.888713	0.950203	105	76	128	80	72.3861	53.8112	78.3069	51.182	anos1b	anosmin 1b
ENSDARG00000006487	2940.43	0.387722	0.0513332	7.55304	4.25227e-14	1.23553e-12	5697	5458	4944	4581	3927.46	3864.49	3024.6	2930.81	anp32a	acidic (leucine-rich) nuclear phosphoprotein 32 family, member A
ENSDARG00000023330	1767.83	-0.0422175	0.0760531	-0.555107	0.578822	0.76381	2176	1934	2294	2426	1500.11	1369.35	1403.41	1552.1	anp32b	acidic (leucine-rich) nuclear phosphoprotein 32 family, member B
ENSDARG00000054804	1766.71	0.234964	0.0651448	3.6068	0.000309995	0.00208184	2699	2938	2761	2593	1860.67	2080.23	1689.1	1658.94	anp32e	acidic (leucine-rich) nuclear phosphoprotein 32 family, member E
ENSDARG00000041083	24.2604	0.429717	0.403972	1.06373	0.287451	0.505169	44	44	38	35	30.3332	31.1538	23.2474	22.3921	anpepa	alanyl (membrane) aminopeptidase a
ENSDARG00000103878	1.08089	1.13899	2.49382	0.456726	0.647868		2	0	0	1	1.37878	0	0	0.639775	anpepb	alanyl (membrane) aminopeptidase b
ENSDARG00000025672	5.02971	0.0762435	0.983831	0.0774966	0.938229	0.971272	8	10	7	12	5.51513	7.08042	4.28241	7.6773	antxr1a	anthrax toxin receptor 1a
ENSDARG00000074075	7.53338	-0.673946	0.887438	-0.759429	0.447596	0.659814	6	3	8	8	4.13635	2.12413	4.89418	5.1182	antxr1b	anthrax toxin receptor 1b
ENSDARG00000063612	131.942	-0.801233	0.197696	-4.05285	5.05976e-05	0.000414168	110	110	243	186	75.833	77.8846	148.661	118.998	antxr1c	anthrax toxin receptor 1c
ENSDARG00000060845	10.9869	1.29019	0.709945	1.81731	0.0691691	0.188859	22	24	10	11	15.1666	16.993	6.11773	7.03753	antxr1d	anthrax toxin receptor 1d
ENSDARG00000104118	423.715	-0.90308	0.117443	-7.68953	1.47674e-14	4.47971e-13	514	562	1130	1118	354.347	397.919	691.303	715.269	antxr2a	anthrax toxin receptor 2a
ENSDARG00000063011	86.0256	-0.478246	0.339389	-1.40914	0.158795	0.342099	27	30	57	32	18.6136	21.2413	34.871	20.4728	antxr2b	anthrax toxin receptor 2b
ENSDARG00000077383	1375.36	-0.440306	0.0878484	-5.01211	5.38351e-07	6.54728e-06	1383	1309	2264	1822	953.428	926.827	1385.05	1165.67	anxa11a	annexin A11a
ENSDARG00000002632	187.356	-0.439279	0.168146	-2.61249	0.00898865	0.0373975	194	169	265	284	133.742	119.659	162.12	181.696	anxa11b	annexin A11b
ENSDARG00000013976	4801.34	-0.329206	0.0632508	-5.20477	1.94236e-07	2.55583e-06	2393	2447	3464	3329	1649.71	1732.58	2119.18	2129.81	anxa13	annexin A13
ENSDARG00000013613	362.241	-0.24789	0.113073	-2.19231	0.0283573	0.09461	540	518	743	661	372.271	366.766	454.547	422.892	anxa13l	annexin A13, like
ENSDARG00000026726	345.563	-1.2079	0.135615	-8.9068	5.25246e-19	2.22563e-17	263	283	767	644	181.31	200.376	469.23	412.015	anxa1a	annexin A1a
ENSDARG00000100095	15.3027	1.79176	0.632331	2.83359	0.00460288	0.0215096	54	46	9	23	37.2271	32.5699	5.50595	14.7148	anxa1b	annexin A1b
ENSDARG00000104359	13.6036	0.551165	0.733002	0.751928	0.452094	0.663477	11	6	10	3	7.5833	4.24825	6.11773	1.91933	anxa1c	annexin A1c
ENSDARG00000003216	1747.11	-1.80903	0.0888195	-20.3675	3.24882e-92	1.5083e-89	790	700	2954	2874	544.619	495.629	1807.18	1838.71	anxa2a	annexin A2a
ENSDARG00000053625	1.19887	0.863644	1.98659	0.434736	0.663754		5	8	4	4	3.44695	5.66433	2.44709	2.5591	anxa2b	annexin A2b
ENSDARG00000009196	4.7307	4.54895	1.65999	2.74036	0.00613727	0.027309	11	10	0	1	7.5833	7.08042	0	0.639775	anxa3a	annexin A3a
ENSDARG00000044254	2836.89	-0.323892	0.0798147	-4.05805	4.94838e-05	0.00040614	3193	2724	4106	4155	2201.23	1928.71	2511.94	2658.27	anxa3b	annexin A3b
ENSDARG00000036456	600.083	-1.24275	0.112354	-11.0611	1.93795e-28	1.42714e-26	369	326	987	851	254.385	230.822	603.82	544.449	anxa4	annexin A4
ENSDARG00000026406	45.7704	-0.0972024	0.334669	-0.290443	0.771477	0.887023	187	170	209	217	128.916	120.367	127.86	138.831	anxa5a	annexin A5a
ENSDARG00000016470	166.676	-1.4709	0.216029	-6.80884	9.83887e-12	2.26421e-10	67	71	207	220	46.1892	50.271	126.637	140.751	anxa5b	annexin A5b
ENSDARG00000013335	51.2986	-0.580109	0.321443	-1.8047	0.071121	0.192675	38	35	67	55	26.1969	24.7815	40.9888	35.1876	anxa6	annexin A6
ENSDARG00000061355	658.698	-0.1455	0.0928698	-1.56671	0.117182	0.278152	1988	1863	2517	2243	1370.51	1319.08	1539.83	1435.02	aoc1	amine oxidase, copper containing 1
ENSDARG00000014646	1155.93	-0.341365	0.0874841	-3.90202	9.53939e-05	0.000734667	957	853	1214	1343	659.747	603.96	742.692	859.218	aoc2	amine oxidase, copper containing 2
ENSDARG00000071475	3.01949	2.60195	2.0538	1.26689	0.205194		1	1	0	0	0.689391	0.708042	0	0	aox5	aldehyde oxidase 5
ENSDARG00000020054	558.313	-1.16105	0.27718	-4.18879	2.80444e-05	0.000244057	24	24	69	51	16.5454	16.993	42.2123	32.6285	aox6	aldehyde oxidase 6
ENSDARG00000031496	477.942	-0.0216839	0.0991601	-0.218676	0.826902	0.918704	878	918	1038	999	605.285	649.982	635.02	639.136	ap1ar	adaptor-related protein complex 1 associated regulatory protein
ENSDARG00000020621	1462.75	-0.0735727	0.0858432	-0.857059	0.391412	0.610497	1999	1890	2487	2089	1378.09	1338.2	1521.48	1336.49	ap1b1	adaptor-related protein complex 1, beta 1 subunit
ENSDARG00000102394	850.254	0.27149	0.084337	3.2191	0.00128592	0.00725935	1604	1327	1420	1291	1105.78	939.571	868.717	825.95	ap1g1	adaptor-related protein complex 1, gamma 1 subunit
ENSDARG00000096249	162.613	-0.109217	0.216102	-0.505393	0.613283	0.787605	241	229	285	281	166.143	162.142	174.355	179.777	ap1m1	adaptor-related protein complex 1, mu 1 subunit
ENSDARG00000096454	17.7694	-0.356285	0.47703	-0.746881	0.455135	0.666276	31	38	57	42	21.3711	26.9056	34.871	26.8706	ap1m2	adaptor-related protein complex 1, mu 2 subunit
ENSDARG00000039512	64.1352	-1.21913	0.340281	-3.58271	0.000340047	0.00226232	29	64	161	83	19.9923	45.3147	98.4954	53.1014	ap1m3	adaptor-related protein complex 1, mu 3 subunit
ENSDARG00000056803	366.592	-0.288456	0.147442	-1.9564	0.0504177	0.148329	705	647	976	869	486.021	458.103	597.09	555.965	ap1s1	adaptor-related protein complex 1, sigma 1 subunit
ENSDARG00000058504	1565.36	-0.0341124	0.0752899	-0.453081	0.650491	0.813104	1647	1531	1839	1794	1135.43	1084.01	1125.05	1147.76	ap1s2	adaptor-related protein complex 1, sigma 2 subunit
ENSDARG00000076073	24.2193	0.589489	0.436896	1.34926	0.177252	0.368173	52	37	35	31	35.8483	26.1975	21.412	19.833	ap1s3a	adaptor-related protein complex 1, sigma 3 subunit, a
ENSDARG00000027966	251.112	0.493964	0.14041	3.51801	0.0004348	0.00279855	782	803	658	600	539.104	568.558	402.546	383.865	ap1s3b	adaptor-related protein complex 1, sigma 3 subunit, b
ENSDARG00000054320	1812.96	0.164849	0.0719348	2.29165	0.0219261	0.077359	3527	3516	3483	3531	2431.48	2489.47	2130.8	2259.05	ap2a1	adaptor-related protein complex 2, alpha 1 subunit
ENSDARG00000035152	4096.34	0.235517	0.0661712	3.55921	0.000371971	0.00245179	7857	7670	7735	7004	5416.54	5430.68	4732.06	4480.99	ap2b1	adaptor-related protein complex 2, beta 1 subunit
ENSDARG00000002790	4368.91	-0.304065	0.0588571	-5.16616	2.38955e-07	3.0928e-06	4653	4507	6229	6393	3207.74	3191.14	3810.73	4090.08	ap2m1a	adaptor-related protein complex 2, mu 1 subunit, a
ENSDARG00000033899	1597.75	0.0841319	0.0827444	1.01677	0.309263	0.527737	2006	1851	2165	1901	1382.92	1310.59	1324.49	1216.21	ap2m1b	adaptor-related protein complex 2, mu 1 subunit, b
ENSDARG00000026967	1046.05	0.149511	0.0808932	1.84825	0.064566	0.17933	1857	1796	1954	1727	1280.2	1271.64	1195.4	1104.89	ap2s1	adaptor-related protein complex 2, sigma 1 subunit
ENSDARG00000105296	325.555	0.491318	0.123576	3.97583	7.01339e-05	0.000556795	793	811	686	590	546.687	574.222	419.676	377.467	ap3b2	adaptor related protein complex 3 beta 2 subunit
ENSDARG00000071424	1278.38	0.275112	0.0909201	3.02586	0.00247928	0.0127954	2322	2119	2133	1966	1600.77	1500.34	1304.91	1257.8	ap3d1	adaptor-related protein complex 3, delta 1 subunit
ENSDARG00000029928	309.546	-0.308556	0.158629	-1.94515	0.0517575	0.151353	178	212	279	261	122.712	150.105	170.685	166.981	ap3m1	adaptor-related protein complex 3, mu 1 subunit
ENSDARG00000016128	575.885	-0.0963746	0.106464	-0.905229	0.365344	0.585842	919	892	1093	1069	633.55	631.573	668.668	683.92	ap3m2	adaptor-related protein complex 3, mu 2 subunit
ENSDARG00000039882	1387.58	0.205418	0.0739189	2.77896	0.00545326	0.0247998	2290	2045	2193	2006	1578.71	1447.95	1341.62	1283.39	ap3s2	adaptor-related protein complex 3, sigma 2 subunit
ENSDARG00000013726	94.7348	0.0573363	0.229537	0.249791	0.802749	0.904921	119	133	149	122	82.0375	94.1696	91.1541	78.0526	ap4b1	adaptor-related protein complex 4, beta 1 subunit
ENSDARG00000103684	176.63	0.707866	0.192632	3.6747	0.000238128	0.00165542	266	282	195	180	183.378	199.668	119.296	115.16	ap4e1	adaptor-related protein complex 4, epsilon 1 subunit
ENSDARG00000056871	127.303	0.0526729	0.265113	0.198681	0.842512	0.927593	141	208	201	176	97.2041	147.273	122.966	112.6	ap4m1	adaptor-related protein complex 4, mu 1 subunit
ENSDARG00000054220	127.217	0.268286	0.217221	1.23508	0.216801	0.421215	165	197	170	166	113.75	139.484	104.001	106.203	ap4s1	adaptor-related protein complex 4, sigma 1 subunit
ENSDARG00000078805	132.354	-0.454575	0.190643	-2.38444	0.0171052	0.0632334	180	187	290	272	124.09	132.404	177.414	174.019	ap5b1	adaptor-related protein complex 5, beta 1 subunit
ENSDARG00000031533	101.513	0.25426	0.221216	1.14937	0.250402	0.462394	102	107	109	87	70.3179	75.7605	66.6832	55.6605	ap5m1	adaptor-related protein complex 5, mu 1 subunit
ENSDARG00000076755	42.1679	-0.171042	0.300315	-0.569543	0.568988	0.756714	56	60	77	69	38.6059	42.4825	47.1065	44.1445	ap5s1	adaptor-related protein complex 5, sigma 1 subunit
ENSDARG00000078111	95.4192	-0.045384	0.212824	-0.213246	0.831135	0.921235	106	136	134	145	73.0754	96.2937	81.9775	92.7674	ap5z1	adaptor-related protein complex 5, zeta 1 subunit
ENSDARG00000021239	234.015	0.122457	0.150912	0.811444	0.417111	0.63437	470	453	513	435	324.014	320.743	313.839	278.302	apaf1	apoptotic peptidase activating factor 1
ENSDARG00000103848	424.287	0.284726	0.118322	2.40636	0.0161122	0.0602087	1267	1274	1159	1170	873.458	902.045	709.045	748.537	apba1a	amyloid beta (A4) precursor protein-binding, family A, member 1a
ENSDARG00000074328	939.129	0.530592	0.0903898	5.87004	4.35679e-09	7.24639e-08	2267	2038	1751	1578	1562.85	1442.99	1071.21	1009.57	apba1b	amyloid beta (A4) precursor protein-binding, family A, member 1b
ENSDARG00000063314	219.649	0.397879	0.180882	2.19966	0.027831	0.0931304	438	428	399	336	301.953	303.042	244.097	214.965	apba2a	amyloid beta (A4) precursor protein-binding, family A, member 2a
ENSDARG00000060639	2208.71	0.195323	0.0641355	3.04548	0.00232312	0.0121095	2847	2924	2872	2759	1962.7	2070.31	1757.01	1765.14	apba2b	amyloid beta (A4) precursor protein-binding, family A, member 2b
ENSDARG00000076560	809.772	0.182138	0.107027	1.7018	0.0887933	0.226482	1167	1181	1317	1000	804.519	836.197	805.705	639.775	apbb1	amyloid beta (A4) precursor protein-binding, family B, member 1 (Fe65)
ENSDARG00000016505	81.7058	-0.949716	0.24459	-3.88289	0.000103222	0.000787571	187	154	376	359	128.916	109.038	230.027	229.679	apbb1ip	amyloid beta (A4) precursor protein-binding, family B, member 1 interacting protein
ENSDARG00000099995	454.785	0.385246	0.123966	3.10768	0.00188563	0.0101384	949	888	814	757	654.232	628.741	497.983	484.31	apbb2b	amyloid beta (A4) precursor protein-binding, family B, member 2b
ENSDARG00000053771	152.823	-0.00398197	0.163834	-0.0243049	0.980609	0.990195	295	226	302	281	203.37	160.017	184.755	179.777	apbb3	amyloid beta (A4) precursor protein-binding, family B, member 3
ENSDARG00000058868	2502.08	0.343241	0.112481	3.05153	0.00227678	0.0118999	3388	3583	3314	2834	2335.66	2536.91	2027.41	1813.12	apc	adenomatous polyposis coli
ENSDARG00000063007	852.221	0.493888	0.14384	3.43358	0.000595661	0.00371631	1726	1731	1540	1208	1189.89	1225.62	942.13	772.849	apc2	adenomatosis polyposis coli 2
ENSDARG00000075557	133.368	-0.870853	0.270828	-3.21552	0.00130206	0.00733884	28	38	74	61	19.3029	26.9056	45.2712	39.0263	apcdd1l	adenomatosis polyposis coli down-regulated 1-like
ENSDARG00000094729	3.05839	-0.245844	1.08467	-0.226654	0.820693		10	6	7	14	6.89391	4.24825	4.28241	8.95686	apela	apelin receptor early endogenous ligand
ENSDARG00000045843	627.159	0.321784	0.11011	2.92238	0.00347365	0.0169407	707	683	632	610	487.399	483.593	386.64	390.263	apex1	APEX nuclease (multifunctional DNA repair enzyme) 1
ENSDARG00000008472	130.508	0.357251	0.20276	1.76195	0.0780785	0.206086	246	238	186	235	169.59	168.514	113.79	150.347	apex2	APEX nuclease (apurinic/apyrimidinic endonuclease) 2
ENSDARG00000005612	422.69	-0.231864	0.150646	-1.53913	0.123772	0.289071	461	402	570	561	317.809	284.633	348.71	358.914	aph1b	APH1B gamma secretase subunit
ENSDARG00000033597	943.728	-0.0638251	0.0954155	-0.668918	0.503548	0.706826	1218	1174	1499	1296	839.678	831.241	917.047	829.149	api5	apoptosis inhibitor 5
ENSDARG00000003132	284.066	-0.334407	0.162811	-2.05396	0.0399793	0.124103	169	185	229	269	116.507	130.988	140.096	172.1	apip	APAF1 interacting protein
ENSDARG00000070485	50.3552	0.245671	0.281765	0.871899	0.383264	0.602412	81	89	74	86	55.8407	63.0157	45.2712	55.0207	apitd1	apoptosis-inducing, TAF9-like domain 1
ENSDARG00000053279	728.435	0.686724	0.114505	5.99732	2.00602e-09	3.53471e-08	1676	1752	1250	1131	1155.42	1240.49	764.716	723.586	apln	apelin
ENSDARG00000004447	39.8804	0.156591	0.323788	0.483623	0.628654	0.799308	75	88	99	65	51.7043	62.3077	60.5655	41.5854	aplnr2	apelin receptor 2
ENSDARG00000002172	2493.31	-1.32098	0.0725208	-18.2151	3.91451e-74	1.16109e-71	2252	2098	6018	6110	1552.51	1485.47	3681.65	3909.03	aplnra	apelin receptor a
ENSDARG00000036670	563.133	-1.2861	0.130065	-9.88817	4.68496e-23	2.55887e-21	600	479	1502	1434	413.635	339.152	918.883	917.438	aplnrb	apelin receptor b
ENSDARG00000098368	5345.29	0.285718	0.0818971	3.48875	0.000485283	0.00308903	13051	12535	12028	11415	8997.24	8875.3	7358.4	7303.04	aplp1	amyloid beta (A4) precursor-like protein 1
ENSDARG00000054864	3147.68	-0.366966	0.0782778	-4.68799	2.75901e-06	2.95642e-05	4416	4432	6606	6145	3044.35	3138.04	4041.37	3931.42	aplp2	amyloid beta (A4) precursor-like protein 2
ENSDARG00000017422	507.471	0.055262	0.114614	0.482159	0.629693	0.799841	638	640	673	700	439.831	453.147	411.723	447.843	apmap	adipocyte plasma membrane associated protein
ENSDARG00000090900	15.0275	1.91042	0.567619	3.36566	0.000763598	0.00462057	56	51	24	8	38.6059	36.1101	14.6825	5.1182	apnl	actinoporin-like protein
ENSDARG00000012076	4.35505	-0.0734231	1.00477	-0.0730742	0.941747	0.972123	7	4	10	3	4.82574	2.83217	6.11773	1.91933	apoa1a	apolipoprotein A-Ia
ENSDARG00000101324	47.3229	0.860544	0.291604	2.95107	0.00316678	0.0156914	168	202	120	108	115.818	143.024	73.4127	69.0957	apoa1b	apolipoprotein A-Ib
ENSDARG00000058806	282.93	0.0699786	0.145088	0.482318	0.62958	0.799745	302	281	310	310	208.196	198.96	189.65	198.33	apoa1bp	apolipoprotein A-I binding protein
ENSDARG00000015866	9.8479	0.183348	0.637607	0.287557	0.773686	0.888468	55	52	48	57	37.9165	36.8182	29.3651	36.4672	apoa2	apolipoprotein A-II
ENSDARG00000101160	0.562601	-2.46159	3.92287	-0.627497	0.530333		1	0	0	6	0.689391	0	0	3.83865	apoa4a	apolipoprotein A-IV a
ENSDARG00000040298	0.789545	-0.531773	6.23916	-0.0852316	0.932077		0	5	0	8	0	3.54021	0	5.1182	apoa4b.1	apolipoprotein A-IV b, tandem duplicate 1
ENSDARG00000020866	0.21344	-3.31482	6.55885	-0.505397	0.61328		0	0	0	4	0	0	0	2.5591	apoa4b.2	apolipoprotein A-IV b, tandem duplicate 2
ENSDARG00000094929	0						0	0	0	0	0	0	0	0	apoa4b.3	apolipoprotein A-IV b, tandem duplicate 3
ENSDARG00000042780	0.853081	-0.844912	2.81617	-0.300022	0.76416		1	0	1	1	0.689391	0	0.611773	0.639775	apoba	apolipoprotein Ba
ENSDARG00000022767	0.65547	-0.45229	2.87051	-0.157564	0.8748		1	1	0	3	0.689391	0.708042	0	1.91933	apobb.1	apolipoprotein Bb, tandem duplicate 1
ENSDARG00000075016	5.01207	0.254153	0.917211	0.277094	0.781708	0.892736	21	9	15	13	14.4772	6.37238	9.17659	8.31708	apobb.2	apolipoprotein Bb, tandem duplicate 2
ENSDARG00000018881	48.3796	-0.481257	0.37168	-1.29482	0.195383	0.392457	62	42	58	103	42.7422	29.7378	35.4828	65.8969	apobec2a	apolipoprotein B mRNA editing enzyme, catalytic polypeptide-like 2a
ENSDARG00000034604	0.828527	0.17161	2.23568	0.0767594	0.938815		1	2	2	1	0.689391	1.41608	1.22355	0.639775	apobec2b	apolipoprotein B mRNA editing enzyme, catalytic polypeptide-like 2b
ENSDARG00000092170	2609.6	-2.10545	0.0976523	-21.5607	4.1999e-103	2.63803e-100	2621	2666	12651	12753	1806.89	1887.64	7739.54	8159.06	apoc1l	apolipoprotein C-I like
ENSDARG00000092155	0.258333	1.69965	6.10071	0.278598	0.780553		3	0	0	1	2.06817	0	0	0.639775	apoc2	apolipoprotein C-II
ENSDARG00000075614	0.176237	2.62028	6.68838	0.391767	0.695231		0	2	0	0	0	1.41608	0	0	apoc4	apolipoprotein C-IV
ENSDARG00000060345	1.17855	0.802394	2.12055	0.378389	0.705142		7	4	3	4	4.82574	2.83217	1.83532	2.5591	apoda.1	apolipoprotein Da, duplicate 1
ENSDARG00000060350	0.673043	-2.8775	3.09314	-0.930285	0.352224		0	0	1	2	0	0	0.611773	1.27955	apoda.2	apolipoprotein Da, duplicate 2
ENSDARG00000057437	3.70746	-0.189042	1.12138	-0.168579	0.866128	0.939269	12	7	9	15	8.27269	4.95629	5.50595	9.59663	apodb	apolipoprotein Db
ENSDARG00000102004	2.16524	-0.39845	1.60706	-0.247937	0.804183		0	4	5	1	0	2.83217	3.05886	0.639775	apoea	apolipoprotein Ea
ENSDARG00000040295	25862.6	-2.28009	0.0584236	-39.027	0	0	18629	17104	98840	94929	12842.7	12110.3	60467.6	60733.2	apoeb	apolipoprotein Eb
ENSDARG00000090980	2020.34	-0.849023	0.089685	-9.46673	2.88755e-21	1.44418e-19	345	382	782	682	237.84	270.472	478.406	436.327	apof	apolipoprotein F
ENSDARG00000007425	139.443	0.679823	0.177807	3.82338	0.000131633	0.000979838	248	218	175	150	170.969	154.353	107.06	95.9663	apol1	apolipoprotein L, 1
ENSDARG00000076838	0.502404	0.159294	6.76668	0.023541	0.981219		0	0	0	0	0	0	0	0	apom	apolipoprotein M
ENSDARG00000104696	171.155	-0.194492	0.180718	-1.07622	0.281828	0.498899	217	203	253	283	149.598	143.732	154.778	181.056	apooa	apolipoprotein O, a
ENSDARG00000026444	397.382	0.142918	0.10721	1.33308	0.182507	0.375385	653	661	665	664	450.172	468.016	406.829	424.811	apoob	apolipoprotein O, b
ENSDARG00000039374	490.112	0.115671	0.113722	1.01714	0.309089	0.527575	557	570	592	570	383.991	403.584	362.169	364.672	apool	apolipoprotein O-like
ENSDARG00000092473	133.492	0.0198942	0.198488	0.100229	0.920163	0.963255	204	183	213	213	140.636	129.572	130.308	136.272	apopt1	apoptogenic 1, mitochondrial
ENSDARG00000104279	4590.26	0.419581	0.0626869	6.69328	2.18228e-11	4.84961e-10	11165	10720	8914	9342	7697.05	7590.21	5453.34	5976.78	appa	amyloid beta (A4) precursor protein a
ENSDARG00000055543	3637.03	-0.037481	0.0610094	-0.614347	0.538986	0.735453	5796	5873	7172	6221	3995.71	4158.33	4387.63	3980.04	appb	amyloid beta (A4) precursor protein b
ENSDARG00000007566	646.941	0.0592592	0.110448	0.536535	0.591589	0.773244	984	1052	1098	1085	678.361	744.86	671.726	694.156	appbp2	amyloid beta precursor protein (cytoplasmic tail) binding protein 2
ENSDARG00000060734	246.12	0.266909	0.197168	1.35372	0.175827	0.366282	280	280	297	224	193.029	198.252	181.696	143.31	appl1	adaptor protein, phosphotyrosine interaction, PH domain and leucine zipper containing 1
ENSDARG00000078139	111.467	0.0186324	0.22263	0.0836924	0.933301	0.969146	123	109	141	115	84.7951	77.1766	86.26	73.5742	appl2	adaptor protein, phosphotyrosine interaction, PH domain and leucine zipper containing 2
ENSDARG00000003519	443.197	-0.316412	0.138459	-2.28525	0.0222984	0.0784391	467	334	615	499	321.946	236.486	376.24	319.248	aprt	adenine phosphoribosyltransferase
ENSDARG00000027143	41.0197	-0.502374	0.38168	-1.31622	0.188101	0.382653	54	32	47	88	37.2271	22.6573	28.7533	56.3002	aptx	aprataxin
ENSDARG00000007086	1.49054	3.32127	2.0795	1.59715	0.110233		5	4	0	1	3.44695	2.83217	0	0.639775	aqp10a	aquaporin 10a
ENSDARG00000058678	2.21116	-0.00845977	1.5019	-0.00563273	0.995506		6	3	3	7	4.13635	2.12413	1.83532	4.47843	aqp10b	aquaporin 10b
ENSDARG00000100555	275.102	-0.182978	0.181555	-1.00783	0.313534	0.532933	215	207	272	263	148.219	146.565	166.402	168.261	aqp11	aquaporin 11
ENSDARG00000043279	2.07773	-0.178727	1.45133	-0.123147	0.901991		2	9	7	7	1.37878	6.37238	4.28241	4.47843	aqp12	aquaporin 12
ENSDARG00000023713	3731.63	0.239103	0.138853	1.72198	0.0850728	0.219528	133	127	119	127	91.689	89.9213	72.801	81.2515	aqp1a.1	aquaporin 1a (Colton blood group), tandem duplicate 1
ENSDARG00000091027	10.7297	0.845967	0.719293	1.17611	0.239551	0.449452	21	16	13	10	14.4772	11.3287	7.95305	6.39775	aqp1a.2	aquaporin 1a (Colton blood group), tandem duplicate 2
ENSDARG00000003808	131.919	1.16059	0.202482	5.73182	9.93579e-09	1.57726e-07	320	314	169	148	220.605	222.325	103.39	94.6868	aqp3a	aquaporin 3a
ENSDARG00000069518	0.36904	4.19318	4.35958	0.961832	0.336134		2	4	0	0	1.37878	2.83217	0	0	aqp3b	aquaporin 3b
ENSDARG00000010565	0.967273	1.97381	2.32122	0.850332	0.39514		2	5	1	1	1.37878	3.54021	0.611773	0.639775	aqp4	aquaporin 4
ENSDARG00000026787	14.9869	-1.42738	0.563432	-2.53338	0.011297	0.0451287	16	13	43	44	11.0303	9.20454	26.3062	28.1501	aqp7	aquaporin 7
ENSDARG00000045141	3.04438	0.397624	1.15243	0.345031	0.730071		7	7	10	2	4.82574	4.95629	6.11773	1.27955	aqp8a.1	aquaporin 8a, tandem duplicate 1
ENSDARG00000071592	0.206313	0.159294	6.76668	0.023541	0.981219		0	0	0	0	0	0	0	0	aqp8a.2	aquaporin 8a, tandem duplicate 2
ENSDARG00000089749	7.54265	-1.34453	0.728192	-1.84639	0.0648355	0.179845	10	9	31	23	6.89391	6.37238	18.965	14.7148	aqp8b	aquaporin 8b
ENSDARG00000053480	21.7433	-0.337997	0.476238	-0.709723	0.477876	0.686185	30	41	68	33	20.6817	29.0297	41.6005	21.1126	aqp9b	aquaporin 9b
ENSDARG00000016775	373.093	-0.149875	0.139842	-1.07175	0.283832	0.501035	436	396	508	522	300.574	280.385	310.781	333.963	aqr	aquarius intron-binding spliceosomal factor
ENSDARG00000067976	368.219	-0.142663	0.153034	-0.932232	0.351217	0.572957	238	287	301	346	164.075	203.208	184.144	221.362	ar	androgen receptor
ENSDARG00000054533	447.923	0.402944	0.118296	3.40623	0.000658663	0.00405489	851	837	786	642	586.672	592.631	480.853	410.736	araf	A-Raf proto-oncogene, serine/threonine kinase
ENSDARG00000076801	112.587	0.138985	0.211168	0.658172	0.510427	0.713077	246	298	297	256	169.59	210.996	181.696	163.782	arap3	ArfGAP with RhoGAP domain, ankyrin repeat and PH domain 3
ENSDARG00000002792	1984.94	-0.542128	0.0777633	-6.97151	3.13553e-12	7.65283e-11	914	752	1426	1283	630.103	532.447	872.388	820.832	arcn1a	archain 1a
ENSDARG00000031214	1053.5	-0.137051	0.0955221	-1.43476	0.151357	0.331458	953	940	1240	1087	656.99	665.559	758.598	695.436	arcn1b	archain 1b
ENSDARG00000076853	2.61527	-0.404149	1.34652	-0.300145	0.764067		2	8	11	4	1.37878	5.66433	6.7295	2.5591	areg	amphiregulin
ENSDARG00000100359	207.894	-0.0196939	0.1555	-0.126649	0.899219	0.954089	316	259	316	334	217.848	183.383	193.32	213.685	arel1	apoptosis resistant E3 ubiquitin protein ligase 1
ENSDARG00000009484	860.968	-0.371074	0.10348	-3.58594	0.000335866	0.00224009	510	460	724	677	351.589	325.699	442.923	433.128	arf1	ADP-ribosylation factor 1
ENSDARG00000014763	2682.76	-0.0863509	0.0669173	-1.29041	0.196908	0.394449	3762	3623	4484	4273	2593.49	2565.24	2743.19	2733.76	arf2a	ADP-ribosylation factor 2a
ENSDARG00000016393	2210.21	-0.376165	0.0650446	-5.78317	7.33041e-09	1.18687e-07	2356	2261	3462	3232	1624.21	1600.88	2117.96	2067.75	arf2b	ADP-ribosylation factor 2b
ENSDARG00000070539	588.483	0.24101	0.108229	2.22686	0.0259568	0.0882417	1466	1426	1471	1265	1010.65	1009.67	899.918	809.316	arf3a	ADP-ribosylation factor 3a
ENSDARG00000036998	82.274	0.2776	0.217363	1.27712	0.201558	0.400812	215	188	186	185	148.219	133.112	113.79	118.358	arf3b	ADP-ribosylation factor 3b
ENSDARG00000045989	166.058	-0.576162	0.203481	-2.83152	0.00463269	0.0216248	94	100	160	163	64.8027	70.8042	97.8836	104.283	arf4a	ADP-ribosylation factor 4a
ENSDARG00000101626	987.413	-0.414446	0.0849105	-4.88098	1.05561e-06	1.21791e-05	1303	1255	1793	2009	898.276	888.592	1096.91	1285.31	arf6a	ADP-ribosylation factor 6a
ENSDARG00000052928	2411.07	-0.40939	0.0533948	-7.66723	1.75756e-14	5.2717e-13	3189	3086	4782	4527	2198.47	2185.02	2925.5	2896.26	arf6b	ADP-ribosylation factor 6b
ENSDARG00000101616	79.5964	-0.0300389	0.237963	-0.126233	0.899547	0.9542	124	123	153	129	85.4845	87.0891	93.6012	82.531	arfgap1	ADP-ribosylation factor GTPase activating protein 1
ENSDARG00000102476	56.4231	-0.201533	0.262005	-0.769195	0.441777	0.655317	110	108	143	137	75.833	76.4685	87.4835	87.6492	arfgap1	ADP-ribosylation factor GTPase activating protein 1
ENSDARG00000067601	495.013	-0.130029	0.114928	-1.13139	0.25789	0.472139	480	490	642	545	330.908	346.94	392.758	348.678	arfgap2	ADP-ribosylation factor GTPase activating protein 2
ENSDARG00000097583	300.348	-0.0723748	0.127612	-0.567148	0.570614	0.758026	497	465	532	596	342.627	329.239	325.463	381.306	arfgap3	ADP-ribosylation factor GTPase activating protein 3
ENSDARG00000063474	432.781	0.253796	0.111872	2.26863	0.0232906	0.0811543	683	628	636	592	470.854	444.65	389.087	378.747	arfgef1	ADP-ribosylation factor guanine nucleotide-exchange factor 1 (brefeldin A-inhibited)
ENSDARG00000074702	370.666	0.2331	0.14201	1.64143	0.100708	0.248895	682	685	684	616	470.165	485.009	418.453	394.102	arfgef2	ADP-ribosylation factor guanine nucleotide-exchange factor 2 (brefeldin A-inhibited)
ENSDARG00000077656	76.1642	0.558558	0.256191	2.18024	0.0292394	0.0969021	242	224	200	154	166.833	158.601	122.355	98.5254	arfgef3	ARFGEF family member 3
ENSDARG00000070055	452.924	-0.585668	0.144851	-4.04323	5.27198e-05	0.000429891	307	324	510	547	211.643	229.406	312.004	349.957	arfip1	ADP-ribosylation factor interacting protein 1 (arfaptin 1)
ENSDARG00000059244	558.592	0.103237	0.115159	0.896477	0.369998	0.590427	833	908	860	949	574.263	642.902	526.125	607.147	arfip2a	ADP-ribosylation factor interacting protein 2a
ENSDARG00000056664	29.4227	-0.0172742	0.429336	-0.0402347	0.967906	0.984684	35	33	44	33	24.1287	23.3654	26.918	21.1126	arfip2b	ADP-ribosylation factor interacting protein 2b
ENSDARG00000057857	326.064	-0.399467	0.147192	-2.71391	0.0066494	0.0291648	274	200	405	294	188.893	141.608	247.768	188.094	arfrp1	ADP-ribosylation factor related protein 1
ENSDARG00000057429	6.84552	-0.345635	0.700655	-0.493302	0.621799	0.793685	15	16	22	22	10.3409	11.3287	13.459	14.0751	arg1	arginase 1
ENSDARG00000039269	8176.21	0.178965	0.0520969	3.43524	0.000592039	0.00369696	12481	11758	12375	11541	8604.29	8325.16	7570.69	7383.65	arg2	arginase 2
ENSDARG00000019223	1506.87	0.258077	0.0695977	3.70812	0.000208802	0.0014785	2801	2732	2540	2624	1930.98	1934.37	1553.9	1678.77	arglu1a	arginine and glutamate rich 1a
ENSDARG00000018319	765.934	0.425633	0.0777957	5.47117	4.47085e-08	6.53075e-07	1355	1283	1142	1052	934.125	908.418	698.644	673.044	arglu1b	arginine and glutamate rich 1b
ENSDARG00000024324	287.208	0.227505	0.136139	1.67112	0.0946989	0.237445	785	720	700	734	541.172	509.79	428.241	469.595	arhgap1	Rho GTPase activating protein 1
ENSDARG00000078326	375.609	0.267986	0.115788	2.31445	0.0206433	0.073513	744	740	713	664	512.907	523.951	436.194	424.811	arhgap10	Rho GTPase activating protein 10
ENSDARG00000100019	56.5416	-0.782791	0.379231	-2.06415	0.0390031	0.121685	23	24	34	56	15.856	16.993	20.8003	35.8274	arhgap11a	Rho GTPase activating protein 11A
ENSDARG00000008548	57.5154	-1.08807	0.309341	-3.51737	0.000435848	0.00280445	54	61	133	140	37.2271	43.1905	81.3658	89.5686	arhgap12a	Rho GTPase activating protein 12a
ENSDARG00000026482	1585.35	0.0733866	0.0687836	1.06692	0.286008	0.503437	3475	3330	3925	3307	2395.63	2357.78	2401.21	2115.74	arhgap12b	Rho GTPase activating protein 12b
ENSDARG00000062349	89.2717	-1.11044	0.212537	-5.22468	1.74459e-07	2.31845e-06	120	127	308	288	82.7269	89.9213	188.426	184.255	arhgap15	Rho GTPase activating protein 15
ENSDARG00000020488	137.64	-0.102957	0.185033	-0.556426	0.57792	0.763127	179	187	219	220	123.401	132.404	133.978	140.751	arhgap17a	Rho GTPase activating protein 17a
ENSDARG00000062263	149.98	-1.36993	0.21043	-6.51017	7.50643e-11	1.56856e-09	144	133	397	402	99.2723	94.1696	242.874	257.19	arhgap17b	Rho GTPase activating protein 17b
ENSDARG00000074740	152.101	0.378766	0.179427	2.11098	0.0347743	0.111274	325	307	283	260	224.052	217.369	173.132	166.342	arhgap18	Rho GTPase activating protein 18
ENSDARG00000083189	25.4589	-0.333375	0.497341	-0.670315	0.502657	0.706221	9	27	31	20	6.20452	19.1171	18.965	12.7955	arhgap19	Rho GTPase activating protein 19
ENSDARG00000089326	13.9211	1.14365	0.588609	1.94297	0.05202	0.151834	39	66	20	33	26.8862	46.7308	12.2355	21.1126	arhgap20	Rho GTPase activating protein 20
ENSDARG00000075673	802.452	0.190409	0.102538	1.85696	0.0633167	0.176572	2019	2034	2054	1915	1391.88	1440.16	1256.58	1225.17	arhgap21b	Rho GTPase activating protein 21b
ENSDARG00000021255	39.3493	-0.25157	0.393362	-0.639538	0.522473	0.722286	73	68	84	103	50.3255	48.1468	51.3889	65.8969	arhgap22	Rho GTPase activating protein 22
ENSDARG00000052950	909.097	0.617558	0.0954353	6.47096	9.73795e-11	1.99773e-09	3226	3267	2469	2261	2223.98	2313.17	1510.47	1446.53	arhgap23a	Rho GTPase activating protein 23a
ENSDARG00000026840	9.57685	-1.9977	0.768249	-2.60033	0.00931335	0.0384784	16	4	27	61	11.0303	2.83217	16.5179	39.0263	arhgap23b	Rho GTPase activating protein 23b
ENSDARG00000100973	149.989	-0.437044	0.187647	-2.32908	0.0198549	0.0711924	257	237	415	333	177.173	167.806	253.886	213.045	arhgap24	Rho GTPase activating protein 24
ENSDARG00000061784	112.024	-0.208136	0.206323	-1.00879	0.313077	0.532481	248	231	346	273	170.969	163.558	211.673	174.659	arhgap25	Rho GTPase activating protein 25
ENSDARG00000104255	823.034	-0.878409	0.1228	-7.15316	8.48011e-13	2.1767e-11	187	171	377	358	128.916	121.075	230.638	229.04	arhgap27	Rho GTPase activating protein 27
ENSDARG00000061798	68.3516	-0.589531	0.251644	-2.34272	0.0191439	0.0692593	104	87	170	151	71.6967	61.5996	104.001	96.6061	arhgap27l	Rho GTPase activating protein 27, like
ENSDARG00000026329	51.0695	-1.24635	0.310065	-4.01962	5.82909e-05	0.000470646	60	89	212	184	41.3635	63.0157	129.696	117.719	arhgap29a	Rho GTPase activating protein 29a
ENSDARG00000017748	179.63	-0.342659	0.156048	-2.19585	0.0281026	0.0938922	255	227	336	346	175.795	160.725	205.556	221.362	arhgap29b	Rho GTPase activating protein 29b
ENSDARG00000059472	171.153	-0.122526	0.202052	-0.606405	0.544246	0.738526	190	184	240	215	130.984	130.28	146.825	137.552	arhgap31	Rho GTPase activating protein 31
ENSDARG00000075334	202.805	0.122609	0.143166	0.856414	0.391769	0.610602	441	421	474	411	304.021	298.086	289.98	262.948	arhgap32a	Rho GTPase activating protein 32a
ENSDARG00000074184	644.714	0.441188	0.108124	4.08037	4.49635e-05	0.000373199	1002	923	835	749	690.77	653.523	510.83	479.192	arhgap32b	Rho GTPase activating protein 32b
ENSDARG00000011333	585.342	0.144934	0.0991654	1.46154	0.143867	0.320277	1063	952	1023	1011	732.823	674.056	625.843	646.813	arhgap33	Rho GTPase activating protein 33
ENSDARG00000060297	518.587	0.340975	0.127746	2.66916	0.00760414	0.0325048	1261	1176	1061	1086	869.322	832.657	649.091	694.796	arhgap35	Rho GTPase activating protein 35b
ENSDARG00000062577	538.083	0.682758	0.149093	4.5794	4.66305e-06	4.75796e-05	1285	1417	1024	860	885.867	1003.3	626.455	550.207	arhgap35	Rho GTPase activating protein 35
ENSDARG00000100007	25.5676	0.742441	0.427609	1.73626	0.0825172	0.21441	98	67	58	52	67.5603	47.4388	35.4828	33.2683	arhgap39	Rho GTPase activating protein 39
ENSDARG00000056619	1033.44	0.204802	0.0943286	2.17116	0.0299192	0.0987007	1188	1197	1189	1123	818.996	847.526	727.398	718.468	arhgap42a	Rho GTPase activating protein 42a
ENSDARG00000104549	27.3398	0.422807	0.38501	1.09817	0.27213	0.489274	55	79	61	51	37.9165	55.9353	37.3181	32.6285	arhgap44	Rho GTPase activating protein 44
ENSDARG00000039265	426.246	-1.64173	0.124956	-13.1384	1.98317e-39	2.16084e-37	397	338	1358	1204	273.688	239.318	830.787	770.29	arhgap4a	Rho GTPase activating protein 4a
ENSDARG00000015003	564.522	0.0869987	0.111904	0.777441	0.436899	0.650928	1257	1247	1362	1272	866.564	882.928	833.234	813.794	arhgap4b	Rho GTPase activating protein 4b
ENSDARG00000061294	944.866	0.299373	0.139424	2.14721	0.0317762	0.103321	1303	1533	1541	1045	898.276	1085.43	942.742	668.565	arhgap5	Rho GTPase activating protein 5
ENSDARG00000059672	148.693	-0.86452	0.17813	-4.85331	1.21417e-06	1.38356e-05	234	245	486	488	161.317	173.47	297.322	312.21	arhgap6	Rho GTPase activating protein 6
ENSDARG00000013390	38.6097	-0.0311319	0.318065	-0.0978791	0.922028	0.963961	91	100	108	110	62.7346	70.8042	66.0715	70.3753	arhgap9	Rho GTPase activating protein 9
ENSDARG00000043795	2459.71	-0.254403	0.0703024	-3.61869	0.000296094	0.00200146	3414	3158	4390	4360	2353.58	2236	2685.68	2789.42	arhgdia	Rho GDP dissociation inhibitor (GDI) alpha
ENSDARG00000004034	1941.88	-0.45662	0.0738904	-6.17969	6.42288e-10	1.20006e-08	2486	2416	3800	3712	1713.83	1710.63	2324.74	2374.85	arhgdig	Rho GDP dissociation inhibitor (GDI) gamma
ENSDARG00000077788	262.82	-0.148018	0.15367	-0.963215	0.33544	0.557266	226	277	346	278	155.802	196.128	211.673	177.858	arhgef10	Rho guanine nucleotide exchange factor (GEF) 10
ENSDARG00000088630	454.865	0.131923	0.128001	1.03064	0.30271	0.52168	452	424	432	460	311.605	300.21	264.286	294.297	arhgef10la	Rho guanine nucleotide exchange factor (GEF) 10-like a
ENSDARG00000074244	539.527	-0.0181787	0.117576	-0.154613	0.877126	0.944054	937	947	1052	1078	645.959	670.516	643.585	689.678	arhgef10lb	Rho guanine nucleotide exchange factor (GEF) 10-like b
ENSDARG00000052482	126.191	0.388673	0.223213	1.74127	0.0816363	0.212587	256	221	217	190	176.484	156.477	132.755	121.557	arhgef11	Rho guanine nucleotide exchange factor (GEF) 11
ENSDARG00000030532	395.43	-0.0346727	0.14758	-0.234942	0.814254	0.911559	592	497	666	580	408.119	351.897	407.441	371.07	arhgef12a	Rho guanine nucleotide exchange factor (GEF) 12a
ENSDARG00000100913	697.016	0.23353	0.112634	2.07335	0.03814	0.119747	785	622	675	660	541.172	440.402	412.947	422.252	arhgef12b	Rho guanine nucleotide exchange factor (GEF) 12b
ENSDARG00000100293	18.0366	-1.46891	0.584526	-2.513	0.0119708	0.0472461	14	11	33	44	9.65147	7.78846	20.1885	28.1501	arhgef15	Rho guanine nucleotide exchange factor (GEF) 15
ENSDARG00000077114	39.1783	-1.61896	0.375647	-4.30977	1.63422e-05	0.000150303	23	29	104	75	15.856	20.5332	63.6244	47.9832	arhgef16	Rho guanine nucleotide exchange factor (GEF) 16
ENSDARG00000011157	184.981	-0.556376	0.251799	-2.20961	0.0271326	0.0913017	46	44	84	64	31.712	31.1538	51.3889	40.9456	arhgef18a	rho/rac guanine nucleotide exchange factor (GEF) 18a
ENSDARG00000042308	359.149	0.194833	0.15455	1.26065	0.207436	0.408604	165	162	158	161	113.75	114.703	96.6601	103.004	arhgef18b	rho/rac guanine nucleotide exchange factor (GEF) 18b
ENSDARG00000078853	46.4471	-0.921262	0.348028	-2.64709	0.00811873	0.034313	44	26	82	66	30.3332	18.4091	50.1654	42.2252	arhgef19	Rho guanine nucleotide exchange factor (GEF) 19
ENSDARG00000040380	459.301	-0.092258	0.109495	-0.84258	0.399463	0.618191	954	990	1224	1093	657.679	700.961	748.81	699.274	arhgef1a	Rho guanine nucleotide exchange factor (GEF) 1a
ENSDARG00000055837	4784.5	0.108709	0.0765795	1.41956	0.155735	0.337393	995	1067	1166	973	685.944	755.481	713.327	622.501	arhgef1b	Rho guanine nucleotide exchange factor (GEF) 1b
ENSDARG00000075819	164.37	-0.195397	0.225291	-0.867311	0.385772	0.605107	131	167	177	204	90.3102	118.243	108.284	130.514	arhgef2	rho/rac guanine nucleotide exchange factor (GEF) 2
ENSDARG00000100606	64.8222	-1.13862	0.285179	-3.99264	6.53409e-05	0.000522825	106	67	255	171	73.0754	47.4388	156.002	109.402	arhgef25a	Rho guanine nucleotide exchange factor (GEF) 25a
ENSDARG00000014465	5.14052	0.158709	0.997239	0.159149	0.873552	0.942534	12	13	12	13	8.27269	9.20454	7.34127	8.31708	arhgef25b	Rho guanine nucleotide exchange factor (GEF) 25b
ENSDARG00000060415	35.0281	-0.624458	0.456815	-1.36698	0.17163	0.360797	29	13	33	39	19.9923	9.20454	20.1885	24.9512	arhgef28	Rho guanine nucleotide exchange factor (GEF) 28
ENSDARG00000013834	28.8021	-1.34912	0.387921	-3.47784	0.000505479	0.00320802	38	39	108	111	26.1969	27.6136	66.0715	71.0151	arhgef3	Rho guanine nucleotide exchange factor (GEF) 3
ENSDARG00000097964	17.7439	0.0170473	0.488497	0.0348975	0.972161	0.986762	31	33	46	25	21.3711	23.3654	28.1415	15.9944	arhgef33	Rho guanine nucleotide exchange factor (GEF) 33
ENSDARG00000002463	57.1383	0.476539	0.24758	1.92479	0.0542559	0.156558	134	163	132	107	92.3784	115.411	80.754	68.456	arhgef37	Rho guanine nucleotide exchange factor (GEF) 37
ENSDARG00000079377	5.91156	-0.0613811	0.911835	-0.0673161	0.94633	0.974759	11	14	10	19	7.5833	9.91259	6.11773	12.1557	arhgef38	Rho guanine nucleotide exchange factor (GEF) 38
ENSDARG00000013476	51.6409	-0.309775	0.387517	-0.799382	0.424069	0.640256	42	75	70	92	28.9544	53.1031	42.8241	58.8593	arhgef39	Rho guanine nucleotide exchange factor (GEF) 39
ENSDARG00000037554	179.115	-0.5716	0.174026	-3.28456	0.00102141	0.00593721	280	237	477	382	193.029	167.806	291.816	244.394	arhgef3l	Rho guanine nucleotide exchange factor (GEF) 3, like
ENSDARG00000012914	1320.02	0.140613	0.111599	1.25998	0.207677	0.408959	2158	1917	1924	2195	1487.71	1357.32	1177.05	1404.31	arhgef4	Rho guanine nucleotide exchange factor (GEF) 4
ENSDARG00000078979	43.9109	1.00541	0.56353	1.78413	0.0744028	0.199116	12	22	12	7	8.27269	15.5769	7.34127	4.47843	arhgef40	Rho guanine nucleotide exchange factor (GEF) 40
ENSDARG00000105491	35.0058	-1.77082	0.350023	-5.05915	4.21128e-07	5.20765e-06	41	37	173	125	28.265	26.1975	105.837	79.9719	arhgef5	Rho guanine nucleotide exchange factor (GEF) 5
ENSDARG00000006683	249.483	-0.173079	0.160062	-1.08132	0.279553	0.496189	358	401	475	481	246.802	283.925	290.592	307.732	arhgef6	Rac/Cdc42 guanine nucleotide exchange factor (GEF) 6
ENSDARG00000006299	416.319	0.181296	0.137686	1.31673	0.187928	0.382446	920	921	986	830	634.24	652.106	603.208	531.014	arhgef7a	Rho guanine nucleotide exchange factor (GEF) 7a
ENSDARG00000073848	402.339	-0.265626	0.128866	-2.06126	0.0392778	0.122287	591	557	865	679	407.43	394.379	529.183	434.407	arhgef7b	Rho guanine nucleotide exchange factor (GEF) 7b
ENSDARG00000061746	399.531	0.128367	0.135052	0.950499	0.341859	0.563851	902	1006	966	984	621.831	712.29	590.972	629.539	arhgef9a	Cdc42 guanine nucleotide exchange factor (GEF) 9a
ENSDARG00000078624	477.859	0.0914103	0.109702	0.833257	0.4047	0.623217	1284	1233	1336	1302	885.178	873.016	817.328	832.988	arhgef9b	Cdc42 guanine nucleotide exchange factor (GEF) 9b
ENSDARG00000101710	670.986	0.409405	0.115555	3.54294	0.000395685	0.0025826	1578	1522	1207	1395	1087.86	1077.64	738.41	892.487	arid1aa	AT rich interactive domain 1Aa (SWI-like)
ENSDARG00000101891	167.932	0.346253	0.16788	2.0625	0.0391601	0.122019	329	365	307	303	226.81	258.435	187.814	193.852	arid1ab	AT rich interactive domain 1Ab (SWI-like)
ENSDARG00000092503	744.324	0.425369	0.119155	3.56987	0.000357163	0.00236514	1865	1830	1613	1462	1285.71	1295.72	986.789	935.352	arid1b	AT rich interactive domain 1B (SWI1-like)
ENSDARG00000007413	307.573	0.335338	0.152696	2.19611	0.0280841	0.0938598	577	672	489	615	397.779	475.804	299.157	393.462	arid2	AT rich interactive domain 2 (ARID, RFX-like)
ENSDARG00000070843	18.832	0.481996	0.444993	1.08315	0.27874	0.495487	48	48	46	31	33.0908	33.986	28.1415	19.833	arid3a	AT rich interactive domain 3A (BRIGHT-like)
ENSDARG00000104034	16.3651	0.398118	0.574311	0.69321	0.488178	0.694571	20	49	37	22	13.7878	34.694	22.6356	14.0751	arid3b	AT rich interactive domain 3B (BRIGHT-like)
ENSDARG00000067729	10.1694	-1.42868	0.716818	-1.99308	0.0462524	0.138635	11	13	31	41	7.5833	9.20454	18.965	26.2308	arid3c	AT rich interactive domain 3C (BRIGHT-like)
ENSDARG00000043873	1509.74	0.181796	0.075758	2.3997	0.0164087	0.0610707	2855	2827	2768	2824	1968.21	2001.63	1693.39	1806.73	arid4a	AT rich interactive domain 4A (RBP1-like)
ENSDARG00000077120	10.9469	0.254431	0.699825	0.363564	0.716184	0.85562	18	40	40	15	12.409	28.3217	24.4709	9.59663	arid5a	AT rich interactive domain 5A (MRF1-like)
ENSDARG00000037196	406.28	0.1994	0.122481	1.628	0.103525	0.253745	675	688	673	653	465.339	487.133	411.723	417.773	arid5b	AT-rich interaction domain 5B
ENSDARG00000069988	2.59299	5.92236	1.84101	3.21691	0.00129581		11	9	0	0	7.5833	6.37238	0	0	arid5b	AT rich interactive domain 5B (MRF1-like)
ENSDARG00000003616	304.462	0.446808	0.146976	3.04	0.0023658	0.01229	684	647	516	573	471.543	458.103	315.675	366.591	arih1	ariadne ubiquitin-conjugating enzyme E2 binding protein homolog 1 (Drosophila)
ENSDARG00000036870	68.0441	0.500152	0.280694	1.78184	0.0747748	0.199801	175	196	144	149	120.643	138.776	88.0953	95.3265	arih1l	ariadne homolog, ubiquitin-conjugating enzyme E2 binding protein, 1 like
ENSDARG00000012848	1876.51	-0.0131184	0.0810492	-0.161857	0.871419	0.941564	2754	2466	2988	2892	1898.58	1746.03	1827.98	1850.23	arih2	ariadne homolog 2 (Drosophila)
ENSDARG00000101680	1031.89	0.0567479	0.092541	0.613219	0.539731	0.735762	1053	968	1062	1106	725.929	685.384	649.703	707.592	arl1	ADP-ribosylation factor-like 1
ENSDARG00000060775	62.554	-0.0308111	0.234827	-0.131207	0.895611	0.952742	159	125	174	150	109.613	88.5052	106.448	95.9663	arl10	ADP-ribosylation factor-like 10
ENSDARG00000036637	3.7449	0.743083	0.928887	0.799972	0.423727	0.64003	16	14	10	10	11.0303	9.91259	6.11773	6.39775	arl11	ADP-ribosylation factor-like 11
ENSDARG00000052575	36.7126	-1.01365	0.396791	-2.55461	0.0106306	0.0429081	35	58	127	84	24.1287	41.0664	77.6951	53.7411	arl13a	ADP-ribosylation factor-like 13A
ENSDARG00000012763	390.377	-0.0123312	0.135797	-0.0908065	0.927646	0.966559	435	456	540	465	299.885	322.867	330.357	297.496	arl13b	ADP-ribosylation factor-like 13b
ENSDARG00000063223	1.76856	1.75471	1.71866	1.02098	0.307266		7	2	3	0	4.82574	1.41608	1.83532	0	arl14	ADP-ribosylation factor-like 14
ENSDARG00000001210	287.988	-0.256041	0.130793	-1.95761	0.0502761	0.148055	287	313	387	413	197.855	221.617	236.756	264.227	arl14ep	ADP-ribosylation factor-like 14 effector protein
ENSDARG00000076040	49.3537	0.0739637	0.430679	0.171737	0.863644	0.938079	17	16	17	18	11.7196	11.3287	10.4001	11.516	arl15a	ADP-ribosylation factor-like 15a
ENSDARG00000057995	255.367	0.00986996	0.162258	0.0608289	0.951495	0.977118	291	208	258	294	200.613	147.273	157.837	188.094	arl15b	ADP-ribosylation factor-like 15b
ENSDARG00000059498	178.674	0.565897	0.179921	3.14525	0.00165944	0.00906193	313	242	205	213	215.779	171.346	125.413	136.272	arl16	ADP-ribosylation factor-like 16
ENSDARG00000069496	452.784	0.111327	0.110778	1.00496	0.314917	0.534353	590	587	587	629	406.741	415.621	359.111	402.419	arl2	ADP-ribosylation factor-like 2
ENSDARG00000025383	296.86	-0.205464	0.144098	-1.42586	0.153908	0.334749	339	379	493	433	233.704	268.348	301.604	277.023	arl2bp	ADP-ribosylation factor-like 2 binding protein
ENSDARG00000071409	912.796	0.129903	0.111059	1.16968	0.242131	0.452401	1569	1622	1707	1553	1081.65	1148.44	1044.3	993.571	arl3	ADP-ribosylation factor-like 3
ENSDARG00000102393	64.0159	-2.1334	0.270097	-7.89865	2.81936e-15	9.02701e-14	101	103	464	534	69.6285	72.9283	283.863	341.64	arl3l1	ADP-ribosylation factor-like 3, like 1
ENSDARG00000015404	105.028	-2.72598	0.211795	-12.8709	6.56526e-38	6.74076e-36	150	124	1053	971	103.409	87.7972	644.197	621.222	arl3l2	ADP-ribosylation factor-like 3, like 2
ENSDARG00000099918	317.884	-0.295778	0.162368	-1.82165	0.068508	0.187547	115	155	166	204	79.28	109.746	101.554	130.514	arl4aa	ADP-ribosylation factor-like 4aa
ENSDARG00000033182	1833.79	0.151188	0.0733651	2.06077	0.0393254	0.122389	2272	2092	2327	2064	1566.3	1481.22	1423.6	1320.5	arl4ab	ADP-ribosylation factor-like 4ab
ENSDARG00000057606	381.716	0.535797	0.118607	4.5174	6.26046e-06	6.25051e-05	1088	958	850	727	750.057	678.304	520.007	465.117	arl4ca	ADP-ribosylation factor-like 4Ca
ENSDARG00000032708	420.591	-0.25948	0.126831	-2.04586	0.0407697	0.126112	420	419	607	516	289.544	296.67	371.346	330.124	arl4cb	ADP-ribosylation factor-like 4Cb
ENSDARG00000045074	636.453	0.0591276	0.0990489	0.596953	0.550539	0.742957	1116	1018	1085	1199	769.36	720.787	663.773	767.091	arl4d	ADP-ribosylation factor-like 4D
ENSDARG00000018627	571.891	-0.115336	0.0999973	-1.15339	0.248751	0.46046	776	823	977	958	534.967	582.718	597.702	612.905	arl5a	ADP-ribosylation factor-like 5A
ENSDARG00000035719	3530.97	-0.482713	0.061699	-7.82368	5.1302e-15	1.60176e-13	2793	2629	4460	4006	1925.47	1861.44	2728.51	2562.94	arl5c	ADP-ribosylation factor-like 5C
ENSDARG00000032056	351.273	0.299009	0.138376	2.16084	0.0307074	0.100658	827	638	645	682	570.126	451.731	394.593	436.327	arl6	ADP-ribosylation factor-like 6
ENSDARG00000054578	2812.02	-0.487627	0.0667104	-7.30961	2.6792e-13	7.17904e-12	2306	2263	3718	3440	1589.74	1602.3	2274.57	2200.83	arl6ip1	ADP-ribosylation factor-like 6 interacting protein 1
ENSDARG00000105036	292.708	0.176334	0.133542	1.32044	0.186689	0.38105	407	377	372	402	280.582	266.932	227.579	257.19	arl6ip4	ADP-ribosylation factor-like 6 interacting protein 4
ENSDARG00000077044	136.291	-0.489765	0.196131	-2.49714	0.0125201	0.0490875	139	134	214	214	95.8253	94.8776	130.919	136.912	arl6ip5a	ADP-ribosylation factor-like 6 interacting protein 5a
ENSDARG00000016238	1658.6	0.132237	0.0753468	1.75505	0.079251	0.208178	2593	2586	2708	2571	1787.59	1831	1656.68	1644.86	arl6ip5b	ADP-ribosylation factor-like 6 interacting protein 5b
ENSDARG00000071013	22.1289	-0.011877	0.444071	-0.0267458	0.978662	0.989739	26	35	42	27	17.9242	24.7815	25.6945	17.2739	arl6ip6	ADP-ribosylation factor-like 6 interacting protein 6
ENSDARG00000094709	268.985	-0.162722	0.153537	-1.05983	0.289224	0.507186	322	300	412	366	221.984	212.413	252.05	234.158	arl8	ADP-ribosylation factor-like 8
ENSDARG00000078686	2089.97	0.26704	0.0775516	3.44338	0.000574494	0.00360109	3634	3378	3488	3025	2505.25	2391.77	2133.86	1935.32	arl8a	ADP-ribosylation factor-like 8A
ENSDARG00000006915	741.664	-0.314671	0.104627	-3.00756	0.00263355	0.0134744	1020	774	1357	1135	703.179	548.024	830.176	726.145	arl8ba	ADP-ribosylation factor-like 8Ba
ENSDARG00000070318	170.926	-0.635086	0.152215	-4.1723	3.01544e-05	0.000260825	297	314	590	472	204.749	222.325	360.946	301.974	arl8bb	ADP-ribosylation factor-like 8Bb
ENSDARG00000071881	185.834	-0.0627728	0.161518	-0.388643	0.69754	0.843431	270	251	290	317	186.136	177.718	177.414	202.809	arl9	ADP-ribosylation factor-like 9
ENSDARG00000013861	269.394	0.183729	0.154697	1.18767	0.234962	0.4439	408	380	463	314	281.272	269.056	283.251	200.889	armc1	armadillo repeat containing 1
ENSDARG00000062960	155.031	-0.039153	0.185789	-0.210739	0.833091	0.922221	166	138	155	193	114.439	97.7098	94.8248	123.477	armc10	armadillo repeat containing 10
ENSDARG00000020887	69.312	-0.0756345	0.295636	-0.255837	0.798077	0.902119	61	60	58	84	42.0528	42.4825	35.4828	53.7411	armc1l	armadillo repeat containing 1, like
ENSDARG00000022660	58.4475	-0.0543056	0.290608	-0.186869	0.851764	0.932462	49	52	53	64	33.7802	36.8182	32.424	40.9456	armc2	armadillo repeat containing 2
ENSDARG00000074708	94.0247	-0.229921	0.272307	-0.844345	0.398477	0.617418	58	54	87	60	39.9847	38.2343	53.2242	38.3865	armc3	armadillo repeat containing 3
ENSDARG00000055128	84.8726	-0.722494	0.393364	-1.83671	0.0662534	0.182871	25	7	38	21	17.2348	4.95629	23.2474	13.4353	armc4	armadillo repeat containing 4
ENSDARG00000078083	135.848	0.257998	0.196073	1.31583	0.188231	0.382844	174	215	194	170	119.954	152.229	118.684	108.762	armc5	armadillo repeat containing 5
ENSDARG00000103770	16.875	0.579592	0.482214	1.20194	0.229388	0.437432	38	25	24	23	26.1969	17.701	14.6825	14.7148	armc6	armadillo repeat containing 6
ENSDARG00000061197	67.9007	-0.326375	0.291601	-1.11925	0.263032	0.477935	67	63	92	90	46.1892	44.6066	56.2831	57.5798	armc7	armadillo repeat containing 7
ENSDARG00000062258	285.718	0.0579076	0.155504	0.372385	0.709606	0.851655	337	308	358	334	232.325	218.077	219.015	213.685	armc8	armadillo repeat containing 8
ENSDARG00000055676	127.208	-0.371369	0.193246	-1.92174	0.0546388	0.157408	125	139	207	175	86.1739	98.4178	126.637	111.961	armt1	acidic residue methyltransferase 1
ENSDARG00000021855	139.348	0.395656	0.174281	2.27022	0.0231942	0.0808841	275	261	232	223	189.583	184.799	141.931	142.67	arnt	aryl hydrocarbon receptor nuclear translocator
ENSDARG00000103697	830.139	0.291337	0.0940492	3.09771	0.0019502	0.0104487	1328	1316	1223	1190	915.511	931.783	748.198	761.333	arnt2	aryl-hydrocarbon receptor nuclear translocator 2
ENSDARG00000006791	440.819	1.15748	0.132458	8.73845	2.36323e-18	9.4335e-17	519	481	272	229	357.794	340.568	166.402	146.509	arntl1a	aryl hydrocarbon receptor nuclear translocator-like 1a
ENSDARG00000035732	210.107	1.1395	0.142784	7.98058	1.45648e-15	4.8075e-14	469	436	245	214	323.324	308.706	149.884	136.912	arntl1b	aryl hydrocarbon receptor nuclear translocator-like 1b
ENSDARG00000041381	47.5626	0.395738	0.344465	1.14885	0.250619	0.462555	72	54	60	47	49.6361	38.2343	36.7064	30.0694	arntl2	aryl hydrocarbon receptor nuclear translocator-like 2
ENSDARG00000008383	1186.23	-0.0769204	0.0857163	-0.897383	0.369515	0.58992	1631	1644	1973	1886	1124.4	1164.02	1207.03	1206.62	arpc1a	actin related protein 2/3 complex, subunit 1A
ENSDARG00000027063	4863.75	-0.986065	0.0549601	-17.9415	5.59444e-72	1.57204e-69	6387	6079	14127	13450	4403.14	4304.19	8642.51	8604.98	arpc1b	actin related protein 2/3 complex, subunit 1B
ENSDARG00000075989	3330.44	-0.438422	0.0617127	-7.10424	1.20985e-12	3.05048e-11	4570	4349	7007	6495	3150.52	3079.27	4286.69	4155.34	arpc2	actin related protein 2/3 complex, subunit 2
ENSDARG00000057882	1788.01	-0.461915	0.0729229	-6.3343	2.38426e-10	4.70159e-09	2397	2361	3761	3560	1652.47	1671.69	2300.88	2277.6	arpc3	actin related protein 2/3 complex, subunit 3
ENSDARG00000054063	1115.89	-0.55335	0.0825849	-6.70039	2.07871e-11	4.63391e-10	1423	1385	2445	2161	981.003	980.638	1495.78	1382.55	arpc4	actin related protein 2/3 complex, subunit 4
ENSDARG00000058225	896.298	-0.344691	0.105441	-3.26905	0.0010791	0.0062167	1352	1200	1907	1713	932.057	849.65	1166.65	1095.94	arpc4l	actin related protein 2/3 complex, subunit 4, like
ENSDARG00000039142	386.857	-0.740963	0.123553	-5.99711	2.00862e-09	3.53637e-08	548	429	909	912	377.786	303.75	556.101	583.475	arpc5a	actin related protein 2/3 complex, subunit 5A
ENSDARG00000019062	844.989	-0.747761	0.10108	-7.39768	1.3858e-13	3.82365e-12	1101	1088	2179	1930	759.019	770.349	1333.05	1234.77	arpc5b	actin related protein 2/3 complex, subunit 5B
ENSDARG00000041720	198.144	-0.0810992	0.150826	-0.5377	0.590784	0.772614	305	284	363	333	210.264	201.084	222.073	213.045	arpc5la	actin related protein 2/3 complex, subunit 5-like, a
ENSDARG00000035433	272.087	0.38638	0.138207	2.79566	0.00517934	0.0237871	575	520	469	466	396.4	368.182	286.921	298.135	arpc5lb	actin related protein 2/3 complex, subunit 5-like, b
ENSDARG00000041085	293.201	-0.16879	0.140652	-1.20006	0.230118	0.43812	212	231	268	288	146.151	163.558	163.955	184.255	arpin	zgc:112432
ENSDARG00000032532	598.84	0.184278	0.130171	1.41566	0.156875	0.339147	817	733	753	769	563.232	518.995	460.665	491.987	arpp19a	cAMP-regulated phosphoprotein 19a
ENSDARG00000039880	190.513	-0.159875	0.172943	-0.924438	0.355258	0.577082	166	143	219	167	114.439	101.25	133.978	106.842	arpp19b	cAMP-regulated phosphoprotein 19b
ENSDARG00000061081	285.875	-0.0197246	0.147897	-0.133367	0.893903	0.952176	535	509	605	577	368.824	360.393	370.122	369.15	arpp21	cAMP-regulated phosphoprotein, 21
ENSDARG00000056511	271.271	-2.67001	0.143259	-18.6376	1.59246e-77	5.1528e-75	284	286	2036	2015	195.787	202.5	1245.57	1289.15	arr3a	arrestin 3a, retinal (X-arrestin)
ENSDARG00000098475	42.9594	0.5991	0.352625	1.69897	0.0893245	0.227585	86	108	66	77	59.2876	76.4685	40.377	49.2627	arr3b	arrestin 3b, retinal (X-arrestin)
ENSDARG00000043241	397.263	-0.114563	0.134266	-0.853258	0.393516	0.612309	754	689	910	835	519.801	487.841	556.713	534.212	arrb1	arrestin, beta 1
ENSDARG00000039215	402.988	0.127916	0.118918	1.07567	0.282077	0.499143	777	652	760	700	535.657	461.643	464.947	447.843	arrb2a	arrestin, beta 2a
ENSDARG00000011545	3013.7	0.240653	0.0575091	4.1846	2.85665e-05	0.000248297	5100	5151	4992	4702	3515.89	3647.12	3053.97	3008.22	arrb2b	arrestin, beta 2b
ENSDARG00000068148	12.7609	-0.392367	0.531062	-0.738836	0.460007	0.670574	41	35	48	63	28.265	24.7815	29.3651	40.3058	arrdc1a	arrestin domain containing 1a
ENSDARG00000079839	437.824	0.162021	0.122115	1.32679	0.18458	0.378263	954	897	1013	837	657.679	635.113	619.726	535.492	arrdc1b	arrestin domain containing 1b
ENSDARG00000020761	1100.04	0.524352	0.0869348	6.03156	1.62386e-09	2.90202e-08	968	1020	776	768	667.33	722.203	474.736	491.347	arrdc2	arrestin domain containing 2
ENSDARG00000052690	1487.64	-0.0216634	0.074636	-0.290255	0.771621	0.887023	1386	1435	1651	1549	955.496	1016.04	1010.04	991.012	arrdc3a	arrestin domain containing 3a
ENSDARG00000036028	4245.63	-0.0927682	0.0579939	-1.59962	0.109683	0.265036	2340	2374	2988	2632	1613.17	1680.89	1827.98	1683.89	arrdc3b	arrestin domain containing 3b
ENSDARG00000042270	172.832	-0.610381	0.210825	-2.89521	0.00378908	0.0182828	61	71	107	118	42.0528	50.271	65.4597	75.4935	arsa	arylsulfatase A
ENSDARG00000101715	9.10145	0.0287521	0.664231	0.0432863	0.965473	0.983734	19	24	20	27	13.0984	16.993	12.2355	17.2739	arsg	arylsulfatase G
ENSDARG00000002299	29.465	-0.126085	0.426819	-0.295407	0.767683	0.885759	22	24	25	31	15.1666	16.993	15.2943	19.833	arsh	arylsulfatase H
ENSDARG00000077606	11.0513	-0.572813	0.740306	-0.773752	0.439078	0.65299	20	20	22	44	13.7878	14.1608	13.459	28.1501	arsia	arylsulfatase family, member Ia
ENSDARG00000059714	101.883	-0.82693	0.313878	-2.63456	0.00842469	0.0353751	28	17	40	49	19.3029	12.0367	24.4709	31.349	arsk	arylsulfatase family, member K
ENSDARG00000078178	0						0	0	0	0	0	0	0	0	art4	ADP-ribosyltransferase 4 (Dombrock blood group)
ENSDARG00000074757	175.207	0.0759899	0.185415	0.409837	0.681926	0.833474	256	330	322	300	176.484	233.654	196.991	191.933	arv1	ARV1 homolog, fatty acid homeostasis modulator
ENSDARG00000074329	173.581	-0.500865	0.181945	-2.75284	0.005908	0.0264843	273	329	446	505	188.204	232.946	272.851	323.087	arvcfa	armadillo repeat gene deleted in velocardiofacial syndrome a
ENSDARG00000061688	1385.58	-0.00512967	0.0929278	-0.0552006	0.955979	0.979602	1705	1479	1886	1683	1175.41	1047.19	1153.8	1076.74	arvcfb	armadillo repeat gene deleted in velocardiofacial syndrome b
ENSDARG00000058011	145.564	0.00342331	0.229021	0.0149476	0.988074	0.99436	123	76	101	120	84.7951	53.8112	61.789	76.773	arxa	aristaless related homeobox a
ENSDARG00000101523	43.3959	-0.156383	0.36976	-0.42293	0.672346	0.827575	66	67	68	97	45.4998	47.4388	41.6005	62.0582	arxb	aristaless related homeobox b
ENSDARG00000027572	551.294	-0.168172	0.117507	-1.43116	0.152384	0.332956	586	531	706	695	403.983	375.97	431.912	444.644	as3mt	arsenite methyltransferase
ENSDARG00000037091	374.65	-0.633466	0.14523	-4.3618	1.28998e-05	0.000121307	274	292	557	426	188.893	206.748	340.757	272.544	asah1a	N-acylsphingosine amidohydrolase (acid ceramidase) 1a
ENSDARG00000034817	1461.35	-0.891418	0.0977738	-9.11715	7.71283e-20	3.46769e-18	948	869	1938	1826	653.543	615.288	1185.62	1168.23	asah1b	N-acylsphingosine amidohydrolase (acid ceramidase) 1b
ENSDARG00000012829	8.34009	0.165332	0.73836	0.223918	0.822821	0.916362	7	12	11	8	4.82574	8.4965	6.7295	5.1182	asah2	N-acylsphingosine amidohydrolase 2
ENSDARG00000029463	407.311	0.377076	0.14978	2.51752	0.0118184	0.0467567	682	787	683	583	470.165	557.229	417.841	372.989	asap1a	ArfGAP with SH3 domain, ankyrin repeat and PH domain 1a
ENSDARG00000039729	1335.12	0.174783	0.0789027	2.21517	0.0267486	0.090258	2268	2412	2445	2191	1563.54	1707.8	1495.78	1401.75	asap1b	ArfGAP with SH3 domain, ankyrin repeat and PH domain 1b
ENSDARG00000010181	103.793	0.315338	0.246772	1.27785	0.201302	0.400579	147	156	136	136	101.34	110.455	83.2011	87.0094	asap2a	ArfGAP with SH3 domain, ankyrin repeat and PH domain 2a
ENSDARG00000019564	67.839	-0.849961	0.286969	-2.96186	0.00305787	0.0152223	47	57	90	119	32.4014	40.3584	55.0595	76.1333	asap2b	ArfGAP with SH3 domain, ankyrin repeat and PH domain 2b
ENSDARG00000026635	50.0443	-0.353817	0.389697	-0.907928	0.363916	0.584099	43	24	35	60	29.6438	16.993	21.412	38.3865	asb1	ankyrin repeat and SOCS box containing 1
ENSDARG00000099461	4.60073	0.956347	1.23119	0.776766	0.437297	0.651203	7	0	2	2	4.82574	0	1.22355	1.27955	asb10	ankyrin repeat and SOCS box containing 10
ENSDARG00000056561	0.866645	3.20088	2.52499	1.26768	0.204913		0	3	0	0	0	2.12413	0	0	asb11	ankyrin repeat and SOCS box containing 11
ENSDARG00000017086	193.372	-0.376799	0.169317	-2.22541	0.0260536	0.0885096	138	165	233	207	95.136	116.827	142.543	132.433	asb12a	ankyrin repeat and SOCS box-containing 12a
ENSDARG00000037558	0						0	0	0	0	0	0	0	0	asb12b	ankyrin repeat and SOCS box-containing 12b
ENSDARG00000079698	230.709	0.390273	0.187241	2.08434	0.0371296	0.117178	339	318	235	323	233.704	225.157	143.767	206.647	asb13a.1	ankyrin repeat and SOCS box containing 13a, tandem duplicate 1
ENSDARG00000045765	31.7854	0.454508	0.399403	1.13797	0.255134	0.468579	72	67	50	63	49.6361	47.4388	30.5886	40.3058	asb13a.2	ankyrin repeat and SOCS box containing 13a, tandem duplicate 2
ENSDARG00000089833	43.2557	-0.114095	0.327211	-0.34869	0.727322	0.862544	61	57	85	58	42.0528	40.3584	52.0007	37.107	asb13b	ankyrin repeat and SOCS box containing 13b
ENSDARG00000008473	0.237856	-3.31475	6.2746	-0.52828	0.597305		0	0	0	4	0	0	0	2.5591	asb14a	ankyrin repeat and SOCS box containing 14a
ENSDARG00000087741	0.407836	-2.89956	6.66227	-0.435221	0.663402		0	0	0	3	0	0	0	1.91933	asb14b	ankyrin repeat and SOCS box containing 14b
ENSDARG00000045633	1.47944	0.172658	1.81989	0.0948728	0.924416		1	4	3	2	0.689391	2.83217	1.83532	1.27955	asb15a	ankyrin repeat and SOCS box containing 15a
ENSDARG00000045863	12.5153	-0.352037	0.770554	-0.456862	0.64777	0.811128	21	32	45	31	14.4772	22.6573	27.5298	19.833	asb15b	ankyrin repeat and SOCS box containing 15b
ENSDARG00000056468	3.89761	1.531	1.2203	1.25461	0.209621	0.411384	5	8	1	4	3.44695	5.66433	0.611773	2.5591	asb16	ankyrin repeat and SOCS box containing 16
ENSDARG00000012948	0.628833	-0.261118	2.67158	-0.0977393	0.922139		2	1	2	2	1.37878	0.708042	1.22355	1.27955	asb18	ankyrin repeat and SOCS box containing 18
ENSDARG00000003797	2.12484	2.15195	1.75021	1.22954	0.21887		6	2	1	1	4.13635	1.41608	0.611773	0.639775	asb2a.1	ankyrin repeat and SOCS box containing 2a, tandem duplicate 1
ENSDARG00000096748	13.0824	-0.311671	0.691482	-0.450729	0.652185	0.814126	13	10	21	11	8.96208	7.08042	12.8472	7.03753	asb2a.2	ankyrin repeat and SOCS box containing 2a, tandem duplicate 2
ENSDARG00000102490	22.0229	0.410017	0.450222	0.910698	0.362455	0.582962	32	37	28	30	22.0605	26.1975	17.1296	19.1933	asb2b	ankyrin repeat and SOCS box containing 2b
ENSDARG00000005246	152.473	0.0332687	0.207104	0.160638	0.872379	0.941934	138	161	147	179	95.136	113.995	89.9306	114.52	asb3	ankyrin repeat and SOCS box containing 3
ENSDARG00000034988	8.75104	0.493929	0.688875	0.717009	0.473369	0.682521	22	25	10	27	15.1666	17.701	6.11773	17.2739	asb4	ankyrin repeat and SOCS box containing 4
ENSDARG00000097938	28.1511	-0.760983	0.485036	-1.56892	0.116666	0.277268	16	11	24	27	11.0303	7.78846	14.6825	17.2739	asb5a	ankyrin repeat and SOCS box containing 5a
ENSDARG00000053222	719.547	-0.064958	0.0918648	-0.707105	0.479501	0.687145	929	807	1001	1025	640.444	571.39	612.384	655.77	asb5b	ankyrin repeat and SOCS box containing 5b
ENSDARG00000007125	18.3686	-0.233417	0.525299	-0.444351	0.656789	0.817722	32	29	39	41	22.0605	20.5332	23.8591	26.2308	asb6	ankyrin repeat and SOCS box containing 6
ENSDARG00000006494	222.11	0.427768	0.148439	2.88177	0.0039545	0.0189738	378	395	294	347	260.59	279.677	179.861	222.002	asb7	ankyrin repeat and SOCS box containing 7
ENSDARG00000003383	651.139	-0.278711	0.122146	-2.28179	0.0225017	0.078939	708	699	1040	869	488.089	494.921	636.244	555.965	asb8	ankyrin repeat and SOCS box containing 8
ENSDARG00000077760	232.814	0.301236	0.162809	1.85024	0.0642784	0.178718	249	263	228	236	171.658	186.215	139.484	150.987	ascc1	activating signal cointegrator 1 complex subunit 1
ENSDARG00000013058	209.06	0.295154	0.194487	1.51761	0.129114	0.297161	291	263	284	221	200.613	186.215	173.743	141.39	ascc2	activating signal cointegrator 1 complex subunit 2
ENSDARG00000086678	194.644	-0.249462	0.179697	-1.38824	0.165064	0.351236	282	266	386	342	194.408	188.339	236.144	218.803	ascc3	activating signal cointegrator 1 complex subunit 3
ENSDARG00000038386	775.738	-0.661988	0.114997	-5.75658	8.58364e-09	1.3721e-07	346	266	564	517	238.529	188.339	345.04	330.764	ascl1a	achaete-scute family bHLH transcription factor 1a
ENSDARG00000101628	70.7211	-1.15152	0.387496	-2.9717	0.00296155	0.0148258	15	20	48	39	10.3409	14.1608	29.3651	24.9512	ascl1b	achaete-scute family bHLH transcription factor 1b
ENSDARG00000101037	52.2305	-0.269747	0.338386	-0.797157	0.42536	0.641203	32	35	36	54	22.0605	24.7815	22.0238	34.5479	asf1ba	anti-silencing function 1Ba histone chaperone
ENSDARG00000043713	403.079	-0.0435753	0.108803	-0.400497	0.688791	0.83771	496	484	538	589	341.938	342.692	329.134	376.828	asf1bb	anti-silencing function 1Bb histone chaperone
ENSDARG00000070981	740.598	0.293429	0.136636	2.14753	0.0317513	0.103303	1382	1421	1271	1283	952.738	1006.13	777.563	820.832	ash1l	ash1 (absent, small, or homeotic)-like (Drosophila)
ENSDARG00000088741	1808.25	0.474158	0.0778648	6.0895	1.13264e-09	2.07628e-08	2587	2547	2211	1921	1783.45	1803.38	1352.63	1229.01	ash1l	ASH1 like histone lysine methyltransferase
ENSDARG00000060392	634.588	0.0985016	0.0975187	1.01008	0.312457	0.531785	837	699	781	819	577.02	494.921	477.794	523.976	ash2l	ash2 (absent, small, or homeotic)-like (Drosophila)
ENSDARG00000008329	273.596	0.268558	0.198906	1.35017	0.17696	0.368016	374	375	339	355	257.832	265.516	207.391	227.12	asic1a	acid-sensing (proton-gated) ion channel 1a
ENSDARG00000101866	117.893	-0.626553	0.21986	-2.84979	0.00437487	0.020652	122	127	234	196	84.1057	89.9213	143.155	125.396	asic1b	acid-sensing (proton-gated) ion channel 1b
ENSDARG00000098428	44.0833	0.293736	0.325932	0.901219	0.367472	0.587977	105	104	113	78	72.3861	73.6363	69.1303	49.9025	asic1c	acid-sensing (proton-gated) ion channel 1c
ENSDARG00000006849	158.287	0.0391183	0.18491	0.211554	0.832455	0.921831	326	309	348	342	224.741	218.785	212.897	218.803	asic2	acid-sensing (proton-gated) ion channel 2
ENSDARG00000025162	87.275	0.256333	0.252184	1.01645	0.309415	0.527827	127	156	137	128	87.5527	110.455	83.8129	81.8912	asic4a	acid-sensing (proton-gated) ion channel family member 4a
ENSDARG00000004243	14.6704	0.090714	0.55741	0.162742	0.870721	0.94124	23	35	32	29	15.856	24.7815	19.5767	18.5535	asic4b	acid-sensing (proton-gated) ion channel family member 4b
ENSDARG00000077858	16.4212	1.60149	2.08702	0.767355	0.442871	0.656027	1	0	0	0	0.689391	0	0	0	asip1	agouti signaling protein 1
ENSDARG00000033361	124.566	-0.466171	0.214776	-2.1705	0.029969	0.0987681	175	128	242	225	120.643	90.6294	148.049	143.949	asl	argininosuccinate lyase
ENSDARG00000098249	411.069	-3.34544	0.133643	-25.0327	2.6931e-138	4.10813e-135	370	375	4290	4168	255.075	265.516	2624.5	2666.58	asmt	acetylserotonin O-methyltransferase
ENSDARG00000070874	84.5943	0.317871	0.239226	1.32874	0.183932	0.377226	107	95	95	86	73.7648	67.264	58.1184	55.0207	asmt2	acetylserotonin O-methyltransferase 2
ENSDARG00000021433	326.047	-0.262853	0.140059	-1.87673	0.0605549	0.170608	525	451	665	642	361.93	319.327	406.829	410.736	asmtl	acetylserotonin O-methyltransferase-like
ENSDARG00000018190	1885.36	0.125275	0.0700339	1.78877	0.0736511	0.197451	2069	1920	2179	1908	1426.35	1359.44	1333.05	1220.69	asna1	arsA arsenite transporter, ATP-binding, homolog 1 (bacterial)
ENSDARG00000016375	53.3994	-0.425441	0.287495	-1.47982	0.138921	0.312368	67	54	81	100	46.1892	38.2343	49.5536	63.9775	asns	asparagine synthetase
ENSDARG00000000540	225.002	-0.123008	0.181881	-0.676309	0.498844	0.703747	202	246	234	310	139.257	174.178	143.155	198.33	asnsd1	asparagine synthetase domain containing 1
ENSDARG00000005154	118.04	0.231966	0.285812	0.811602	0.41702	0.634322	85	69	63	83	58.5982	48.8549	38.5417	53.1014	aspa	aspartoacylase
ENSDARG00000038297	0.955192	0.840462	2.13675	0.393337	0.69407		7	1	4	1	4.82574	0.708042	2.44709	0.639775	aspdh	aspartate dehydrogenase domain containing
ENSDARG00000052942	310.805	0.394734	0.137817	2.86419	0.00418072	0.019885	567	455	462	406	390.885	322.159	282.639	259.749	aspg	asparaginase homolog (S. cerevisiae)
ENSDARG00000055945	1806.49	-0.0888885	0.0866548	-1.02578	0.304997	0.523649	790	896	955	1047	544.619	634.405	584.243	669.845	asph	aspartate beta-hydroxylase
ENSDARG00000075813	234.296	-0.343686	0.174768	-1.96653	0.0492371	0.145497	417	390	570	573	287.476	276.136	348.71	366.591	asphd1	aspartate beta-hydroxylase domain containing 1
ENSDARG00000059629	653.955	-0.0883903	0.0901762	-0.980196	0.32699	0.547873	1009	974	1154	1199	695.595	689.633	705.986	767.091	asphd2	aspartate beta-hydroxylase domain containing 2
ENSDARG00000103754	83.1034	-0.0017444	0.278304	-0.00626797	0.994999	0.997334	79	82	89	91	54.4619	58.0594	54.4478	58.2196	aspm	abnormal spindle microtubule assembly
ENSDARG00000002192	5.21112	0.374239	0.948358	0.394617	0.693125	0.840294	7	22	9	16	4.82574	15.5769	5.50595	10.2364	aspn	asporin (LRR class 1)
ENSDARG00000021681	209.806	-0.279326	0.166112	-1.68155	0.0926559	0.233537	195	193	302	225	134.431	136.652	184.755	143.949	asrgl1	asparaginase like 1
ENSDARG00000062530	46.5459	0.168665	0.360506	0.467855	0.639888	0.80654	56	86	89	53	38.6059	60.8916	54.4478	33.9081	aste1	asteroid homolog 1 (Drosophila)
ENSDARG00000070132	875.584	-2.26912	0.10089	-22.491	5.0785e-112	4.01691e-109	408	456	2551	2110	281.272	322.867	1560.63	1349.93	aste1	asteroid homolog 1 (Drosophila)
ENSDARG00000068323	2014.25	-0.039727	0.070137	-0.56642	0.571108	0.758362	3003	3236	3787	3385	2070.24	2291.22	2316.78	2165.64	astn1	astrotactin 1
ENSDARG00000011764	278.072	0.050186	0.161748	0.310272	0.756354	0.87796	352	324	343	385	242.666	229.406	209.838	246.314	asun	asunder, spermatogenesis regulator homolog (Drosphila)
ENSDARG00000036956	197.742	0.644871	0.183066	3.5226	0.000427329	0.00275461	588	490	384	385	405.362	346.94	234.921	246.314	asxl1	additional sex combs like transcriptional regulator 1
ENSDARG00000076501	151.448	-0.0433745	0.197736	-0.219356	0.826373	0.918334	188	237	285	206	129.605	167.806	174.355	131.794	asxl2	additional sex combs like transcriptional regulator 2
ENSDARG00000004823	4.47098	2.484	1.95191	1.2726	0.20316	0.403069	1	4	0	1	0.689391	2.83217	0	0.639775	asz1	ankyrin repeat, SAM and basic leucine zipper domain containing 1
ENSDARG00000023267	273.322	0.179786	0.139989	1.28429	0.199041	0.397219	447	420	414	440	308.158	297.378	253.274	281.501	atad1a	ATPase family, AAA domain containing 1a
ENSDARG00000056609	449.318	-0.041504	0.125858	-0.329769	0.741575	0.870267	494	598	652	605	340.559	423.409	398.876	387.064	atad1b	ATPase family, AAA domain containing 1b
ENSDARG00000060537	447.717	0.300234	0.107833	2.78426	0.00536494	0.0244606	890	895	845	775	613.558	633.697	516.948	495.826	atad2b	ATPase family, AAA domain containing 2B
ENSDARG00000070568	88.0564	0.289365	0.299667	0.965622	0.334233	0.55604	109	116	113	93	75.1436	82.1328	69.1303	59.4991	atad5a	ATPase family, AAA domain containing 5a
ENSDARG00000101126	73.9382	-0.147057	0.268663	-0.547367	0.584127	0.767527	84	63	106	76	57.9088	44.6066	64.8479	48.6229	atad5b	ATPase family, AAA domain containing 5b
ENSDARG00000004472	160.149	0.46047	0.181246	2.54058	0.0110669	0.0444006	441	368	304	351	304.021	260.559	185.979	224.561	atat1	alpha tubulin acetyltransferase 1
ENSDARG00000071678	2275.76	0.0272351	0.0602322	0.452169	0.651147	0.813543	4135	4144	4650	4426	2850.63	2934.13	2844.74	2831.65	atcaya	ataxia, cerebellar, Cayman type a
ENSDARG00000059781	262.521	0.269264	0.159434	1.68888	0.0912429	0.23108	807	732	737	689	556.338	518.287	450.876	440.805	atcayb	ataxia, cerebellar, Cayman type b
ENSDARG00000044301	545.38	-0.0974594	0.0970192	-1.00454	0.31512	0.534613	662	674	822	775	456.377	477.22	502.877	495.826	atf1	activating transcription factor 1
ENSDARG00000023903	9.41527	1.22294	0.689869	1.77272	0.0762755	0.202857	19	29	11	12	13.0984	20.5332	6.7295	7.6773	atf2	activating transcription factor 2
ENSDARG00000007823	6687.7	0.394095	0.0682329	5.77574	7.66142e-09	1.23392e-07	3151	3044	2660	2604	2172.27	2155.28	1627.32	1665.98	atf3	activating transcription factor 3
ENSDARG00000039515	2264.99	-0.270081	0.0702306	-3.84563	0.000120241	0.000902908	2868	2771	3608	3976	1977.17	1961.98	2207.28	2543.75	atf4a	activating transcription factor 4a
ENSDARG00000038141	17835	0.136451	0.0496938	2.74584	0.00603553	0.0269493	25404	24004	25658	24537	17513.3	16995.8	15696.9	15698.2	atf4b	activating transcription factor 4b
ENSDARG00000068096	1622.76	0.779896	0.0813661	9.58502	9.24385e-22	4.74547e-20	1232	1208	801	786	849.33	855.314	490.03	502.863	atf5a	activating transcription factor 5a
ENSDARG00000077785	3775.36	0.528296	0.0779962	6.77335	1.25834e-11	2.86189e-10	885	1000	758	703	610.111	708.042	463.724	449.762	atf5b	activating transcription factor 5b
ENSDARG00000012656	1985.38	-0.0187615	0.0613657	-0.305732	0.759808	0.879913	2879	2723	3325	3016	1984.76	1928	2034.14	1929.56	atf6	activating transcription factor 6
ENSDARG00000101369	121.479	-0.14836	0.214975	-0.690127	0.490114	0.695983	184	145	183	223	126.848	102.666	111.954	142.67	atf6b	activating transcription factor 6 beta
ENSDARG00000011298	190.865	-0.208657	0.177569	-1.17508	0.239965	0.449928	159	181	220	219	109.613	128.156	134.59	140.111	atf7a	activating transcription factor 7a
ENSDARG00000055481	619.117	0.501052	0.0936527	5.3501	8.79053e-08	1.22941e-06	1152	1090	900	869	794.178	771.766	550.595	555.965	atf7b	activating transcription factor 7b
ENSDARG00000069619	2094.49	0.3592	0.0679672	5.28491	1.2577e-07	1.72175e-06	4099	4008	3730	3334	2825.81	2837.83	2281.91	2133.01	atf7ip	activating transcription factor 7 interacting protein
ENSDARG00000089698	113.394	0.224716	0.222979	1.00779	0.313556	0.532933	144	131	142	121	99.2723	92.7535	86.8717	77.4128	atf7ip2	activating transcription factor 7 interacting protein 2
ENSDARG00000104846	135.46	0.14144	0.229919	0.615175	0.538439	0.735083	154	180	187	152	106.166	127.448	114.401	97.2459	atg10	ATG10 autophagy related 10 homolog (S. cerevisiae)
ENSDARG00000043287	404.101	0.103833	0.121196	0.856739	0.391589	0.6106	585	655	667	623	403.294	463.767	408.052	398.58	atg101	autophagy related 101
ENSDARG00000069545	292.336	0.162952	0.146892	1.10933	0.267287	0.482845	283	284	264	301	195.098	201.084	161.508	192.572	atg12	ATG12 autophagy related 12 homolog (S. cerevisiae)
ENSDARG00000036040	940.157	0.126515	0.0925151	1.36751	0.171467	0.36056	1220	1285	1393	1174	841.057	909.834	852.199	751.096	atg13	ATG13 autophagy related 13 homolog (S. cerevisiae)
ENSDARG00000099430	269.796	0.232207	0.142121	1.63387	0.102286	0.251568	509	494	467	486	350.9	349.773	285.698	310.931	atg16l1	ATG16 autophagy related 16-like 1 (S. cerevisiae)
ENSDARG00000043238	83.9977	0.0220748	0.27793	0.0794257	0.936694	0.970618	187	144	223	142	128.916	101.958	136.425	90.8481	atg16l2	ATG16 autophagy related 16-like 2 (S. cerevisiae)
ENSDARG00000097650	82.9826	0.535315	0.249864	2.14243	0.0321589	0.104296	176	181	164	112	121.333	128.156	100.331	71.6548	atg2b	autophagy related 2B
ENSDARG00000009350	681.506	-0.109198	0.0968473	-1.12752	0.259521	0.47411	791	777	992	898	545.308	550.148	606.879	574.518	atg3	autophagy related 3
ENSDARG00000014531	107.535	0.275279	0.222188	1.23894	0.215366	0.419381	142	155	132	142	97.8935	109.746	80.754	90.8481	atg4a	autophagy related 4A, cysteine peptidase
ENSDARG00000052104	306.238	0.0796019	0.141514	0.562501	0.573775	0.760192	266	307	307	299	183.378	217.369	187.814	191.293	atg4b	autophagy related 4B, cysteine peptidase
ENSDARG00000044373	394.854	0.397322	0.135905	2.92352	0.00346093	0.0169009	508	585	542	388	350.211	414.204	331.581	248.233	atg4c	autophagy related 4C, cysteine peptidase
ENSDARG00000043548	139.323	-0.159136	0.186766	-0.852058	0.394182	0.612719	249	226	297	295	171.658	160.017	181.696	188.734	atg4da	autophagy related 4D, cysteine peptidase a
ENSDARG00000088145	23.3617	-0.237226	0.390573	-0.607378	0.5436	0.738306	45	31	54	46	31.0226	21.9493	33.0357	29.4297	atg4db	autophagy related 4D, cysteine peptidase b
ENSDARG00000023396	717.41	-0.0289044	0.11684	-0.247385	0.80461	0.906233	615	690	756	732	423.975	488.549	462.5	468.316	atg5	ATG5 autophagy related 5 homolog (S. cerevisiae)
ENSDARG00000102893	470.484	-0.319742	0.119583	-2.6738	0.00749969	0.0321613	608	639	915	825	419.15	452.439	559.772	527.815	atg7	ATG7 autophagy related 7 homolog (S. cerevisiae)
ENSDARG00000044551	561.11	0.0075236	0.11398	0.0660082	0.947371	0.975006	777	776	888	838	535.657	549.44	543.254	536.132	atg9a	ATG9 autophagy related 9 homolog A (S. cerevisiae)
ENSDARG00000055292	200.564	0.220289	0.169604	1.29884	0.193997	0.390486	376	427	435	337	259.211	302.334	266.121	215.604	atg9b	autophagy related 9B
ENSDARG00000016706	864.667	-0.0824489	0.118418	-0.696255	0.486269	0.692872	296	279	392	289	204.06	197.544	239.815	184.895	atic	5-aminoimidazole-4-carboxamide ribonucleotide formyltransferase/IMP cyclohydrolase
ENSDARG00000060481	384.04	0.00970925	0.12168	0.079793	0.936402	0.970618	946	727	930	923	652.164	514.746	568.949	590.513	atl1	atlastin GTPase 1
ENSDARG00000057719	259.899	-0.503521	0.157451	-3.19795	0.00138408	0.00773174	142	121	201	215	97.8935	85.6731	122.966	137.552	atl2	atlastin GTPase 2
ENSDARG00000004270	590.182	-0.281426	0.115594	-2.4346	0.0149082	0.0565305	812	676	1078	942	559.785	478.636	659.491	602.668	atl3	atlastin 3
ENSDARG00000002385	110.911	-0.00875577	0.241337	-0.0362803	0.971059	0.986178	131	164	172	160	90.3102	116.119	105.225	102.364	atm	ATM serine/threonine kinase
ENSDARG00000068601	140.084	-0.185729	0.206882	-0.897751	0.369318	0.589826	149	129	181	172	102.719	91.3374	110.731	110.041	atmin	ATM interactor
ENSDARG00000092067	129.948	0.506898	0.183214	2.7667	0.00566268	0.0255508	388	338	254	315	267.484	239.318	155.39	201.529	atn1	atrophin 1
ENSDARG00000055294	2.29616	-2.16017	1.53647	-1.40593	0.159745		4	1	17	8	2.75756	0.708042	10.4001	5.1182	atoh1a	atonal bHLH transcription factor 1a
ENSDARG00000099564	15.0559	0.150162	0.627146	0.239437	0.810767	0.909647	20	6	11	15	13.7878	4.24825	6.7295	9.59663	atoh1b	atonal bHLH transcription factor 1b
ENSDARG00000039602	108.024	0.3881	0.295693	1.31251	0.189347	0.384567	49	78	71	38	33.7802	55.2273	43.4359	24.3115	atoh1c	atonal bHLH transcription factor 1c
ENSDARG00000069552	3.81322	-0.00695175	0.973951	-0.00713768	0.994305	0.997267	8	9	7	12	5.51513	6.37238	4.28241	7.6773	atoh7	atonal bHLH transcription factor 7
ENSDARG00000037555	97.2211	-0.279229	0.314809	-0.886979	0.37509	0.594952	92	64	105	106	63.424	45.3147	64.2361	67.8162	atoh8	atonal bHLH transcription factor 8
ENSDARG00000087693	530.142	-0.175722	0.133204	-1.3192	0.187104	0.381586	467	481	602	594	321.946	340.568	368.287	380.027	atox1	antioxidant 1 copper chaperone
ENSDARG00000061039	78.7603	-1.04374	0.243659	-4.28359	1.83898e-05	0.000166907	87	77	208	170	59.977	54.5192	127.249	108.762	atp10a	ATPase, class V, type 10A
ENSDARG00000076230	10.148	0.98442	0.621414	1.58416	0.113157	0.271008	40	41	31	15	27.5756	29.0297	18.965	9.59663	atp10b	ATPase, class V, type 10B
ENSDARG00000078887	242.692	0.040364	0.143053	0.282161	0.77782	0.890946	377	319	404	352	259.9	225.865	247.156	225.201	atp10d	ATPase, class V, type 10D
ENSDARG00000008413	556.245	0.116011	0.103461	1.12131	0.262157	0.476885	1297	1253	1344	1284	894.14	887.176	822.223	821.472	atp11a	ATPase, class VI, type 11A
ENSDARG00000036442	365.522	-0.145632	0.105783	-1.37671	0.168602	0.356256	718	820	977	925	494.983	580.594	597.702	591.792	atp11c	ATPase, Class VI, type 11C
ENSDARG00000029931	526.25	-0.250448	0.141212	-1.77356	0.0761353	0.20261	573	448	693	662	395.021	317.203	423.958	423.531	atp13a1	ATPase type 13A1
ENSDARG00000061890	160.777	-0.577277	0.198963	-2.90143	0.00371463	0.0179763	189	120	293	222	130.295	84.965	179.249	142.03	atp13a2	ATPase type 13A2
ENSDARG00000002791	4368.91	-0.416117	0.0520225	-7.99879	1.25651e-15	4.17327e-14	7476	7160	11406	10415	5153.89	5069.58	6977.88	6663.26	atp1a1a.1	ATPase, Na+/K+ transporting, alpha 1a polypeptide, tandem duplicate 1
ENSDARG00000007739	2.66768	1.98648	1.37732	1.44228	0.149225		2	12	3	1	1.37878	8.4965	1.83532	0.639775	atp1a1a.2	ATPase, Na+/K+ transporting, alpha 1a polypeptide, tandem duplicate 2
ENSDARG00000039131	32.479	1.29424	0.845372	1.53097	0.125776	0.292247	10	1	3	2	6.89391	0.708042	1.83532	1.27955	atp1a1a.3	ATPase, Na+/K+ transporting, alpha 1a polypeptide, tandem duplicate 3
ENSDARG00000001870	23.6094	-1.44087	0.397622	-3.62372	0.000290391	0.00196688	40	31	108	107	27.5756	21.9493	66.0715	68.456	atp1a1a.4	ATPase, Na+/K+ transporting, alpha 1a polypeptide, tandem duplicate 4
ENSDARG00000040252	34.1075	-0.178895	0.528868	-0.338261	0.735166	0.867293	7	12	9	15	4.82574	8.4965	5.50595	9.59663	atp1a1a.5	ATPase, Na+/K+ transporting, alpha 1a polypeptide, tandem duplicate 5
ENSDARG00000019856	53311.9	-0.836762	0.0443696	-18.8589	2.48313e-79	8.69341e-77	3254	3093	6527	6135	2243.28	2189.97	3993.04	3925.02	atp1a1b	ATPase, Na+/K+ transporting, alpha 1b polypeptide
ENSDARG00000010472	18.6535	-0.652937	0.489106	-1.33496	0.18189	0.374475	32	21	50	43	22.0605	14.8689	30.5886	27.5103	atp1a2a	ATPase, Na+/K+ transporting, alpha 2a polypeptide
ENSDARG00000018259	6100.32	0.116673	0.0748312	1.55914	0.118962	0.280998	16561	16178	17220	16506	11417	11454.7	10534.7	10560.1	atp1a3a	ATPase, Na+/K+ transporting, alpha 3a polypeptide
ENSDARG00000104139	1709.97	-0.60075	0.064862	-9.26198	2.00676e-20	9.46055e-19	2464	2511	4391	4041	1698.66	1777.89	2686.29	2585.33	atp1a3b	ATPase, Na+/K+ transporting, alpha 3b polypeptide
ENSDARG00000013144	9658.12	-0.580091	0.0499864	-11.605	3.88723e-31	3.07466e-29	9116	8918	15637	14486	6284.49	6314.32	9566.29	9267.79	atp1b1a	ATPase, Na+/K+ transporting, beta 1a polypeptide
ENSDARG00000076833	3828.53	0.588402	0.0602381	9.76793	1.54579e-22	8.23239e-21	16071	15593	12531	11011	11079.2	11040.5	7666.12	7044.57	atp1b1b	ATPase, Na+/K+ transporting, beta 1b polypeptide
ENSDARG00000099203	3955.95	0.229468	0.0492243	4.66168	3.13644e-06	3.31899e-05	10612	10437	10521	9544	7315.82	7389.83	6436.46	6106.02	atp1b2a	ATPase, Na+/K+ transporting, beta 2a polypeptide
ENSDARG00000034424	138.287	-2.04767	0.196635	-10.4136	2.15029e-25	1.35863e-23	185	207	891	919	127.537	146.565	545.089	587.954	atp1b2b	ATPase, Na+/K+ transporting, beta 2b polypeptide
ENSDARG00000015790	724.075	0.350067	0.089174	3.92566	8.6492e-05	0.00067266	1654	1538	1475	1323	1140.25	1088.97	902.365	846.423	atp1b3a	ATPase, Na+/K+ transporting, beta 3a polypeptide
ENSDARG00000042837	2528.09	0.0619492	0.0629387	0.98428	0.324978	0.545744	6041	6101	6827	6175	4164.61	4319.76	4176.57	3950.61	atp1b3b	ATPase, Na+/K+ transporting, beta 3b polypeptide
ENSDARG00000053262	13547.4	-0.213015	0.0689132	-3.09107	0.0019944	0.0106561	886	909	1252	1074	610.8	643.61	765.939	687.119	atp1b4	ATPase, Na+/K+ transporting, beta 4 polypeptide
ENSDARG00000020574	5.85659	-0.139626	0.962948	-0.144999	0.884712	0.948251	9	9	7	15	6.20452	6.37238	4.28241	9.59663	atp2a1	ATPase, Ca++ transporting, cardiac muscle, fast twitch 1
ENSDARG00000035458	4.51057	0.748875	1.02109	0.73341	0.463308	0.673548	8	4	6	2	5.51513	2.83217	3.67064	1.27955	atp2a1l	ATPase, Ca++ transporting, cardiac muscle, fast twitch 1 like
ENSDARG00000029439	409.933	-0.128507	0.121	-1.06204	0.288218	0.506016	536	480	693	549	369.514	339.86	423.958	351.237	atp2a2a	ATPase, Ca++ transporting, cardiac muscle, slow twitch 2a
ENSDARG00000005122	1481.44	-0.566355	0.0950297	-5.95977	2.52599e-09	4.38221e-08	1268	1249	2304	1866	874.148	884.344	1409.52	1193.82	atp2a2b	ATPase, Ca++ transporting, cardiac muscle, slow twitch 2b
ENSDARG00000060978	939.698	0.193427	0.0970034	1.99403	0.0461492	0.138402	2134	2096	2087	2044	1471.16	1484.06	1276.77	1307.7	atp2a3	ATPase, Ca++ transporting, ubiquitous
ENSDARG00000012684	4185.1	0.000994879	0.0561102	0.0177308	0.985854	0.993108	9013	8824	10385	9533	6213.48	6247.76	6353.26	6098.98	atp2b1a	ATPase, Ca++ transporting, plasma membrane 1a
ENSDARG00000007788	62.7485	-1.43968	0.307251	-4.68568	2.79028e-06	2.98543e-05	133	80	287	355	91.689	56.6433	175.579	227.12	atp2b1b	ATPase, Ca++ transporting, plasma membrane 1b
ENSDARG00000063433	1571.62	0.593144	0.0778775	7.61637	2.60913e-14	7.675e-13	4699	4641	3485	3429	3239.45	3286.02	2132.03	2193.79	atp2b2	ATPase, Ca++ transporting, plasma membrane 2
ENSDARG00000043474	1880.52	0.508992	0.0867006	5.87069	4.3399e-09	7.22862e-08	5328	5423	4447	3999	3673.08	3839.71	2720.55	2558.46	atp2b3a	ATPase, Ca++ transporting, plasma membrane 3a
ENSDARG00000023445	1584.34	0.418494	0.0824967	5.07286	3.91883e-07	4.87423e-06	4795	4900	3984	4114	3305.63	3469.4	2437.3	2632.04	atp2b3b	ATPase, Ca++ transporting, plasma membrane 3b
ENSDARG00000060197	425.217	-0.433893	0.122826	-3.53257	0.000411535	0.00267135	729	792	1192	1105	502.566	560.769	729.233	706.952	atp2c1	ATPase, Ca++ transporting, type 2C, member 1
ENSDARG00000010149	6888.3	-0.249486	0.0566622	-4.40304	1.06743e-05	0.000102225	8428	7915	10505	11166	5810.19	5604.15	6426.67	7143.73	atp5a1	ATP synthase, H+ transporting, mitochondrial F1 complex, alpha subunit 1, cardiac muscle
ENSDARG00000070083	17921.7	-0.105335	0.0552331	-1.9071	0.0565076	0.161701	25477	23026	29112	29109	17563.6	16303.4	17809.9	18623.2	atp5b	ATP synthase, H+ transporting, mitochondrial F1 complex, beta polypeptide
ENSDARG00000045514	4811.56	-0.0875183	0.064968	-1.3471	0.177948	0.369208	5140	4927	6252	5700	3543.47	3488.52	3824.8	3646.72	atp5c1	ATP synthase, H+ transporting, mitochondrial F1 complex, gamma polypeptide 1
ENSDARG00000019404	1797.51	-0.0755817	0.0721827	-1.04709	0.295059	0.513384	2308	2286	2640	2763	1591.11	1618.58	1615.08	1767.7	atp5d	ATP synthase, H+ transporting, mitochondrial F1 complex, delta subunit
ENSDARG00000095897	974.974	-0.363375	0.109152	-3.32906	0.000871388	0.00518511	1133	1171	1626	1683	781.08	829.117	994.742	1076.74	atp5e	ATP synthase, H+ transporting, mitochondrial F1 complex, epsilon subunit
ENSDARG00000011553	2601.55	-0.171478	0.0741787	-2.31169	0.0207947	0.0740154	2807	2604	3541	3266	1935.12	1843.74	2166.29	2089.51	atp5f1	ATP synthase, H+ transporting, mitochondrial Fo complex, subunit B1
ENSDARG00000056008	3764.1	-0.180539	0.0765887	-2.35725	0.0184108	0.0670615	4388	4442	5597	5578	3025.05	3145.12	3424.09	3568.67	atp5g1	ATP synthase, H+ transporting, mitochondrial Fo complex, subunit C1 (subunit 9)
ENSDARG00000017775	2138.34	-0.100571	0.0784105	-1.28262	0.199626	0.397948	2038	1985	2468	2350	1404.98	1405.46	1509.86	1503.47	atp5g3a	ATP synthase, H+ transporting, mitochondrial Fo complex, subunit C3 (subunit 9), genome duplicate a
ENSDARG00000009447	4158.44	-0.242235	0.0759919	-3.18765	0.00143436	0.00797504	4952	4831	6493	6427	3413.86	3420.55	3972.24	4111.84	atp5g3b	ATP synthase, H+ transporting, mitochondrial F0 complex, subunit c3 (subunit 9) b
ENSDARG00000098355	1821.44	-0.154789	0.0878976	-1.76101	0.0782361	0.206426	2195	2018	2504	2726	1513.21	1428.83	1531.88	1744.03	atp5h	ATP synthase, H+ transporting, mitochondrial Fo complex, subunit d
ENSDARG00000078113	793.728	-0.194957	0.130032	-1.4993	0.133797	0.30404	1023	1077	1319	1365	705.247	762.561	806.928	873.293	atp5ia	ATP synthase, H+ transporting, mitochondrial Fo complex, subunit Ea
ENSDARG00000068940	1476.56	-0.119966	0.107797	-1.11289	0.265757	0.480894	1721	1677	2023	2098	1186.44	1187.39	1237.62	1342.25	atp5ib	ATP synthase, H+ transporting, mitochondrial Fo complex, subunit Eb
ENSDARG00000014313	1534.49	-0.143927	0.088788	-1.62102	0.105013	0.256451	1853	1862	2202	2378	1277.44	1318.37	1347.12	1521.39	atp5j	ATP synthase, H+ transporting, mitochondrial Fo complex, subunit F6
ENSDARG00000037867	1301.21	-0.0579373	0.106641	-0.543291	0.58693	0.769505	1497	1612	1774	1840	1032.02	1141.36	1085.28	1177.19	atp5j2	ATP synthase, H+ transporting, mitochondrial Fo complex, subunit F2
ENSDARG00000011841	3369.38	-0.147286	0.0909078	-1.62017	0.105197	0.256752	3344	3565	4200	4344	2305.32	2524.17	2569.45	2779.18	atp5l	ATP synthase, H+ transporting, mitochondrial F0 complex, subunit g
ENSDARG00000001788	6577.02	0.0150357	0.0759847	0.197878	0.843141	0.927807	7806	7501	8408	8500	5381.39	5311.02	5143.78	5438.09	atp5o	ATP synthase, H+ transporting, mitochondrial F1 complex, O subunit
ENSDARG00000012072	326.98	-0.147227	0.140081	-1.05102	0.293251	0.511573	386	378	482	463	266.105	267.64	294.874	296.216	atp5s	ATP synthase, H+ transporting, mitochondrial F0 complex, subunit s
ENSDARG00000063911	24367.9	-0.0960366	0.077806	-1.23431	0.217088	0.421658	30498	29848	34111	37815	21025	21133.6	20868.2	24193.1	ATP6	ATP synthase 6
ENSDARG00000041417	584.791	0.514915	0.136581	3.77004	0.000163224	0.00118444	1577	1363	1189	1108	1087.17	965.061	727.398	708.871	atp6ap1a	ATPase, H+ transporting, lysosomal accessory protein 1a
ENSDARG00000037153	831.452	-1.09873	0.100114	-10.9748	5.05025e-28	3.64369e-26	606	510	1396	1273	417.771	361.101	854.035	814.434	atp6ap1b	ATPase, H+ transporting, lysosomal accessory protein 1b
ENSDARG00000091509	92.8087	0.622517	0.218633	2.84732	0.00440889	0.0207621	326	347	291	199	224.741	245.691	178.026	127.315	atp6ap1la	ATPase, H+ transporting, lysosomal accessory protein 1-like a
ENSDARG00000090963	601.915	0.137746	0.097121	1.41829	0.156105	0.337906	1151	1091	1113	1161	793.489	772.474	680.903	742.779	atp6ap1lb	ATPase, H+ transporting, lysosomal accessory protein 1-like b
ENSDARG00000008735	3685.09	-0.183207	0.0701243	-2.6126	0.00898559	0.0373921	7240	6684	8952	8697	4991.19	4732.55	5476.59	5564.13	atp6ap2	ATPase, H+ transporting, lysosomal accessory protein 2
ENSDARG00000020847	785.14	-0.564568	0.097761	-5.77498	7.69628e-09	1.2386e-07	627	567	1047	926	432.248	401.46	640.526	592.432	atp6v0a1a	ATPase, H+ transporting, lysosomal V0 subunit a1a
ENSDARG00000015174	1305.04	0.240221	0.101788	2.36001	0.0182744	0.0667012	2915	2893	3036	2466	2009.57	2048.36	1857.34	1577.69	atp6v0a1b	ATPase, H+ transporting, lysosomal V0 subunit a1b
ENSDARG00000035538	409.316	0.186894	0.13478	1.38666	0.165547	0.351993	824	665	679	778	568.058	470.848	415.394	497.745	atp6v0a2a	ATPase, H+ transporting, lysosomal V0 subunit a2a
ENSDARG00000035565	234.793	-0.495701	0.204784	-2.42061	0.0154944	0.0583288	134	147	263	181	92.3784	104.082	160.896	115.799	atp6v0a2b	ATPase, H+ transporting, lysosomal V0 subunit a2b
ENSDARG00000031681	1662.69	-0.0224632	0.0671298	-0.334623	0.737909	0.86854	2526	2537	2972	2774	1741.4	1796.3	1818.19	1774.74	atp6v0b	ATPase, H+ transporting, lysosomal V0 subunit b
ENSDARG00000057853	3444.62	-0.484762	0.0588524	-8.23691	1.76719e-16	6.21747e-15	6197	5954	9728	9263	4272.16	4215.68	5951.32	5926.24	atp6v0ca	ATPase, H+ transporting, lysosomal, V0 subunit ca
ENSDARG00000036577	3870.12	0.213244	0.0712454	2.99309	0.0027617	0.0140159	9374	9177	9217	8660	6462.35	6497.7	5638.71	5540.45	atp6v0cb	ATPase, H+ transporting, lysosomal, V0 subunit cb
ENSDARG00000069090	1929.32	0.0260601	0.0637577	0.408737	0.682733	0.834026	3619	3502	3889	3918	2494.91	2479.56	2379.18	2506.64	atp6v0d1	ATPase, H+ transporting, lysosomal V0 subunit d1
ENSDARG00000101794	168.978	-1.06857	0.176132	-6.06688	1.30422e-09	2.35444e-08	227	188	458	512	156.492	133.112	280.192	327.565	atp6v0e1	ATPase, H+ transporting, lysosomal V0 subunit e1
ENSDARG00000034534	2125.23	-0.15908	0.0728142	-2.18473	0.0289085	0.0960289	4319	3929	5402	4886	2977.48	2781.9	3304.8	3125.94	atp6v1aa	ATPase, H+ transporting, lysosomal, V1 subunit Aa
ENSDARG00000076318	1155.58	-0.169602	0.0781303	-2.17076	0.0299495	0.0987193	2159	2184	2813	2645	1488.4	1546.36	1720.92	1692.21	atp6v1ab	ATPase, H+ transporting, lysosomal, V1 subunit Ab
ENSDARG00000043465	1971.18	0.309512	0.0684668	4.52062	6.16581e-06	6.16465e-05	4948	5058	4619	4402	3411.11	3581.28	2825.78	2816.29	atp6v1b2	ATPase, H+ transporting, lysosomal, V1 subunit B2
ENSDARG00000013443	1500.48	-0.502847	0.0846154	-5.94274	2.80304e-09	4.81978e-08	2310	2526	3863	3794	1592.49	1788.51	2363.28	2427.31	atp6v1ba	ATPase, H+ transporting, lysosomal, V1 subunit B, member a
ENSDARG00000023967	1102.45	-0.143826	0.0823662	-1.74617	0.0807807	0.211105	2089	1886	2582	2324	1440.14	1335.37	1579.6	1486.84	atp6v1c1a	ATPase, H+ transporting, lysosomal, V1 subunit C1a
ENSDARG00000035880	577.672	-0.104983	0.118065	-0.889196	0.373898	0.593809	1102	1102	1227	1416	759.709	780.262	750.645	905.922	atp6v1c1b	ATPase, H+ transporting, lysosomal, V1 subunit C1b
ENSDARG00000070440	1.39182	-4.45045	2.33139	-1.90892	0.0562722		0	0	5	4	0	0	3.05886	2.5591	atp6v1c2	ATPase, H+ transporting, lysosomal, V1 subunit C2
ENSDARG00000011175	1614.52	-0.0315623	0.084497	-0.373532	0.708753	0.850966	3139	2957	3657	3305	2164	2093.68	2237.25	2114.46	atp6v1d	ATPase, H+ transporting, lysosomal V1 subunit D
ENSDARG00000014085	1036.99	-0.715917	0.100434	-7.1282	1.01686e-12	2.58526e-11	509	442	926	819	350.9	312.954	566.502	523.976	atp6v1e1	ATPase H+ transporting V1 subunit E1
ENSDARG00000030694	3063.52	0.0660484	0.064801	1.01925	0.308084	0.526782	6907	6703	7428	7093	4761.62	4746	4544.25	4537.93	atp6v1e1b	ATPase, H+ transporting, lysosomal, V1 subunit E1b
ENSDARG00000045543	494.621	-0.0382849	0.115775	-0.330684	0.740883	0.870122	918	814	1001	984	632.861	576.346	612.384	629.539	atp6v1f	ATPase, H+ transporting, lysosomal, V1 subunit F
ENSDARG00000022315	2570.79	-0.00541855	0.0735378	-0.0736839	0.941262	0.972075	6193	6077	6769	6977	4269.4	4302.77	4141.09	4463.71	atp6v1g1	ATPase, H+ transporting, lysosomal, V1 subunit G1
ENSDARG00000006370	2089.08	0.0430522	0.0633805	0.679266	0.496969	0.702308	4038	3717	4261	4142	2783.76	2631.79	2606.76	2649.95	atp6v1h	ATPase, H+ transporting, lysosomal V1 subunit H
ENSDARG00000003699	203.591	-0.373206	0.20589	-1.81265	0.0698862	0.190102	259	349	446	435	178.552	247.107	272.851	278.302	atp7a	ATPase, Cu++ transporting, alpha polypeptide
ENSDARG00000058145	18.1028	-0.187591	0.585169	-0.320576	0.748531	0.873662	26	20	17	41	17.9242	14.1608	10.4001	26.2308	atp7b	ATPase, Cu++ transporting, beta polypeptide (Wilson disease)
ENSDARG00000063910	1182.77	-0.0466775	0.123213	-0.378838	0.704808	0.848089	1312	1277	1356	1624	904.481	904.169	829.564	1039	ATP8	ATP synthase 8
ENSDARG00000063001	142.233	-0.0770095	0.174257	-0.44193	0.65854	0.818701	258	298	346	310	177.863	210.996	211.673	198.33	atp8a1	ATPase, aminophospholipid transporter (APLT), class I, type 8A, member 1
ENSDARG00000077492	299.171	0.648075	0.14341	4.51903	6.21225e-06	6.20818e-05	823	760	551	576	567.369	538.112	337.087	368.511	atp8a2	ATPase, aminophospholipid transporter, class I, type 8A, member 2
ENSDARG00000060980	4.48945	0.571792	1.25724	0.454798	0.649255	0.812034	2	19	10	6	1.37878	13.4528	6.11773	3.83865	atp8b1	ATPase, aminophospholipid transporter, class I, type 8B, member 1
ENSDARG00000099216	41.3967	-0.200265	0.332713	-0.601915	0.547231	0.740834	81	102	116	119	55.8407	72.2203	70.9656	76.1333	atp8b2	ATPase, aminophospholipid transporter, class I, type 8B, member 2
ENSDARG00000042285	13.2404	0.818964	0.586653	1.396	0.162716	0.347948	30	27	16	20	20.6817	19.1171	9.78836	12.7955	atp8b3	ATPase, aminophospholipid transporter, class I, type 8B, member 3
ENSDARG00000079453	24.2142	0.547071	0.4668	1.17196	0.241213	0.451279	59	51	42	42	40.6741	36.1101	25.6945	26.8706	atp8b4	ATPase, class I, type 8B, member 4
ENSDARG00000062040	75.928	-1.23941	0.299632	-4.13644	3.52728e-05	0.000300833	46	20	100	74	31.712	14.1608	61.1773	47.3434	atp8b5a	ATPase, class I, type 8B, member 5a
ENSDARG00000062521	138.081	0.0689448	0.198106	0.348019	0.727826	0.862901	240	210	277	203	165.454	148.689	169.461	129.874	atp9b	ATPase, class II, type 9B
ENSDARG00000042799	712.065	-0.0176666	0.0992383	-0.178021	0.858706	0.936069	836	747	911	878	576.331	528.907	557.325	561.723	atpaf1	ATP synthase mitochondrial F1 complex assembly factor 1
ENSDARG00000056270	249.881	0.108192	0.146781	0.737097	0.461064	0.671244	253	254	253	272	174.416	179.843	154.778	174.019	atpaf2	ATP synthase mitochondrial F1 complex assembly factor 2
ENSDARG00000067975	792.71	-0.451955	0.112379	-4.0217	5.77807e-05	0.000466881	720	670	1053	1069	496.361	474.388	644.197	683.92	atpif1a	ATPase inhibitory factor 1a
ENSDARG00000044092	3211.97	0.132743	0.0855376	1.55187	0.120694	0.284183	5455	5266	5310	5600	3760.63	3728.55	3248.51	3582.74	atpif1b	ATPase inhibitory factor 1b
ENSDARG00000059057	1779.6	0.041157	0.0952156	0.432251	0.665559	0.822979	3548	3248	3665	3705	2445.96	2299.72	2242.15	2370.37	atpv0e2	ATPase, H+ transporting V0 subunit e2
ENSDARG00000079625	73.5463	0.0525341	0.228233	0.230177	0.817954	0.913753	118	116	128	124	81.3481	82.1328	78.3069	79.3321	atr	ATR serine/threonine kinase
ENSDARG00000043388	452.242	0.287995	0.12232	2.35444	0.0185508	0.0674906	634	648	538	633	437.074	458.811	329.134	404.978	atraid	all-trans retinoic acid-induced differentiation factor
ENSDARG00000063076	194.878	-0.370056	0.207623	-1.78234	0.0746931	0.1997	107	124	148	185	73.7648	87.7972	90.5424	118.358	atrip	ATR interacting protein
ENSDARG00000062164	421.972	-0.150512	0.145377	-1.03533	0.300517	0.519874	514	439	613	568	354.347	310.83	375.017	363.392	atrn	attractin
ENSDARG00000077188	386.677	0.218724	0.120771	1.81107	0.0701306	0.19067	863	918	922	790	594.944	649.982	564.054	505.423	atrnl1a	attractin-like 1a
ENSDARG00000006420	856.088	0.270626	0.0988625	2.73739	0.00619283	0.0275064	1437	1464	1463	1227	990.655	1036.57	895.023	785.004	atrnl1b	attractin-like 1b
ENSDARG00000042236	3572.52	0.183969	0.0528539	3.4807	0.000500107	0.00317677	7068	6868	7087	6618	4872.62	4862.83	4335.63	4234.03	atrx	alpha thalassemia/mental retardation syndrome X-linked homolog (human)
ENSDARG00000008439	171.675	0.123638	0.182305	0.678194	0.497649	0.702943	227	200	238	200	156.492	141.608	145.602	127.955	atxn10	ataxin 10
ENSDARG00000061687	157.32	-0.155521	0.231892	-0.670664	0.502435	0.706217	180	218	234	261	124.09	154.353	143.155	166.981	atxn1a	ataxin 1a
ENSDARG00000060862	366.808	0.46466	0.148006	3.13947	0.00169251	0.0092137	668	669	600	484	460.513	473.68	367.064	309.651	atxn1b	ataxin 1b
ENSDARG00000086977	87.4338	0.2638	0.310224	0.850355	0.395128	0.613564	126	144	145	107	86.8633	101.958	88.707	68.456	atxn1l	ataxin 1-like
ENSDARG00000052897	640.858	0.145191	0.127351	1.14008	0.254253	0.467283	1125	1040	1041	1142	775.565	736.363	636.855	730.623	atxn2	ataxin 2
ENSDARG00000011597	681.837	0.00772196	0.112859	0.0684214	0.94545	0.974189	1176	1032	1186	1263	810.724	730.699	725.562	808.036	atxn2l	ataxin 2-like
ENSDARG00000099274	172.719	-0.0962399	0.180816	-0.532254	0.59455	0.775505	187	186	215	230	128.916	131.696	131.531	147.148	atxn3	ataxin 3
ENSDARG00000074804	286.457	0.320312	0.131255	2.44038	0.0146717	0.0557921	510	539	487	452	351.589	381.635	297.933	289.178	atxn7	ataxin 7
ENSDARG00000089860	64.7664	0.328649	0.312801	1.05066	0.293413	0.511687	93	142	121	89	64.1134	100.542	74.0245	56.94	atxn7l1	ataxin 7-like 1
ENSDARG00000055300	143.24	0.328944	0.253903	1.29555	0.19513	0.392022	245	167	142	222	168.901	118.243	86.8717	142.03	atxn7l2a	ataxin 7-like 2a
ENSDARG00000056268	183.613	-0.175742	0.173662	-1.01198	0.311549	0.530831	281	248	339	328	193.719	175.594	207.391	209.846	atxn7l2b	ataxin 7-like 2b
ENSDARG00000029331	455.203	0.161758	0.100782	1.60503	0.108487	0.2631	857	836	882	809	590.808	591.923	539.584	517.578	atxn7l3	ataxin 7-like 3
ENSDARG00000042975	941.791	-0.120709	0.102991	-1.17203	0.241184	0.451279	663	594	752	773	457.066	420.577	460.053	494.546	auh	AU RNA binding protein/enoyl-CoA hydratase
ENSDARG00000092609	532.751	0.147794	0.103967	1.42156	0.155155	0.336738	672	608	659	631	463.271	430.489	403.158	403.698	aup1	ancient ubiquitous protein 1
ENSDARG00000012485	45.8006	0.444868	0.328179	1.35557	0.175237	0.36568	78	70	82	40	53.7725	49.5629	50.1654	25.591	aurka	aurora kinase A
ENSDARG00000074985	387.704	-0.21403	0.13798	-1.55117	0.120862	0.284422	432	370	578	462	297.817	261.975	353.605	295.576	aurkaip1	aurora kinase A interacting protein 1
ENSDARG00000037640	150.736	-0.0918169	0.193781	-0.473818	0.63563	0.802893	141	154	169	182	97.2041	109.038	103.39	116.439	aurkb	aurora kinase B
ENSDARG00000056427	506.365	0.307963	0.09813	3.13831	0.00169922	0.00924315	805	784	712	721	554.96	555.105	435.582	461.278	auts2a	autism susceptibility candidate 2a
ENSDARG00000020946	864.851	0.228179	0.108946	2.09442	0.0362222	0.114857	484	485	433	490	333.665	343.4	264.898	313.49	auts2b	autism susceptibility candidate 2b
ENSDARG00000087961	0.332869	1.61684	5.67508	0.284902	0.775719		0	1	0	0	0	0.708042	0	0	avd	avidin
ENSDARG00000002894	118.295	0.185532	0.209424	0.885916	0.375663	0.595284	168	141	179	125	115.818	99.8339	109.507	79.9719	aven	apoptosis, caspase activation inhibitor
ENSDARG00000059342	4.24756	0.756312	0.955683	0.791383	0.42872	0.644173	18	14	7	14	12.409	9.91259	4.28241	8.95686	avil	advillin
ENSDARG00000055538	419.884	0.0752345	0.126095	0.596651	0.550741	0.743136	522	542	595	534	359.862	383.759	364.005	341.64	avl9	AVL9 homolog (S. cerevisiase)
ENSDARG00000058567	26.187	-3.29783	0.483803	-6.81648	9.32987e-12	2.15637e-10	16	18	126	245	11.0303	12.7448	77.0834	156.745	avp	arginine vasopressin
ENSDARG00000077083	15.0013	-1.05043	0.627098	-1.67506	0.0939231	0.235813	10	26	52	32	6.89391	18.4091	31.8122	20.4728	avpr1aa	arginine vasopressin receptor 1Aa
ENSDARG00000045788	12.8851	-0.206021	0.593404	-0.347184	0.728453	0.863214	35	18	33	35	24.1287	12.7448	20.1885	22.3921	avpr1ab	arginine vasopressin receptor 1Ab
ENSDARG00000007436	6.4919	-1.13891	0.808376	-1.40889	0.158868	0.342153	6	17	33	24	4.13635	12.0367	20.1885	15.3546	avpr2aa	arginine vasopressin receptor 2a, duplicate a
ENSDARG00000029219	7.49161	-0.334362	0.827795	-0.403919	0.686273	0.836102	11	25	28	23	7.5833	17.701	17.1296	14.7148	avpr2ab	arginine vasopressin receptor 2a, duplicate b
ENSDARG00000076690	4.42365	-0.0652042	0.947426	-0.0688225	0.945131	0.974001	8	10	9	12	5.51513	7.08042	5.50595	7.6773	avpr2l	arginine vasopressin receptor 2, like
ENSDARG00000062355	38.7248	-0.790545	0.427775	-1.84804	0.0645967	0.179369	13	18	33	27	8.96208	12.7448	20.1885	17.2739	axdnd1	axonemal dynein light chain domain containing 1
ENSDARG00000102964	1096.5	0.283154	0.116655	2.42727	0.0152129	0.0574983	1849	1720	1649	1625	1274.68	1217.83	1008.81	1039.63	axin1	axin 1
ENSDARG00000100149	669.47	-0.2434	0.104163	-2.33671	0.0194542	0.0700334	710	705	983	889	489.468	499.169	601.373	568.76	axin2	axin 2 (conductin, axil)
ENSDARG00000102419	54.1672	0.137157	0.330533	0.414957	0.678174	0.831453	63	90	89	67	43.4316	63.7238	54.4478	42.8649	azi2	5-azacytidine induced 2
ENSDARG00000052789	222.226	-0.0373554	0.17032	-0.219324	0.826397	0.918334	389	393	444	452	268.173	278.26	271.627	289.178	azin1a	antizyme inhibitor 1a
ENSDARG00000035869	524.194	0.338036	0.128929	2.62189	0.00874448	0.0365526	1130	1104	1008	966	779.012	781.678	616.667	618.023	azin1b	antizyme inhibitor 1b
ENSDARG00000053136	4434.63	-0.215016	0.0718118	-2.99416	0.00275203	0.0139701	5563	5147	6940	6934	3835.08	3644.29	4245.7	4436.2	b2m	beta-2-microglobulin
ENSDARG00000015887	7035.44	0.0347066	0.0660244	0.525664	0.599122	0.779034	6307	6355	6857	6944	4347.99	4499.61	4194.93	4442.6	b2ml	beta-2-microglobulin, like
ENSDARG00000046133	193.128	-0.443943	0.173517	-2.5585	0.0105126	0.0424962	239	173	345	281	164.764	122.491	211.062	179.777	b3galnt2	beta-1,3-N-acetylgalactosaminyltransferase 2
ENSDARG00000079700	119.931	0.109121	0.214729	0.508183	0.611325	0.786449	150	222	226	161	103.409	157.185	138.261	103.004	b3galt1a	UDP-Gal:betaGlcNAc beta 1,3-galactosyltransferase, polypeptide 1a
ENSDARG00000075154	21.0572	-0.0669958	0.556081	-0.120479	0.904104	0.956689	51	49	60	57	35.1589	34.694	36.7064	36.4672	b3galt1b	UDP-Gal:betaGlcNAc beta 1,3-galactosyltransferase, polypeptide 1b
ENSDARG00000102061	662.581	-0.0326823	0.102933	-0.31751	0.750857	0.874478	1468	1163	1523	1479	1012.03	823.453	931.73	946.228	b3galt2	UDP-Gal:betaGlcNAc beta 1,3-galactosyltransferase, polypeptide 2
ENSDARG00000076218	4.86033	-0.683978	1.01996	-0.670594	0.502479	0.706217	3	7	9	9	2.06817	4.95629	5.50595	5.75798	b3galt4	UDP-Gal:betaGlcNAc beta 1,3-galactosyltransferase, polypeptide 4
ENSDARG00000038414	111.588	-0.0507669	0.218753	-0.232074	0.81648	0.912652	146	124	154	158	100.651	87.7972	94.213	101.085	b3galt6	UDP-Gal:betaGal beta 1,3-galactosyltransferase polypeptide 6
ENSDARG00000040547	586.093	0.0892589	0.122726	0.7273	0.467042	0.676356	913	804	1037	769	629.414	569.266	634.408	491.987	b3gat1a	beta-1,3-glucuronyltransferase 1 (glucuronosyltransferase P) a
ENSDARG00000055279	54.9118	0.437204	0.329053	1.32867	0.183956	0.377238	121	196	127	135	83.4163	138.776	77.6951	86.3697	b3gat1b	beta-1,3-glucuronyltransferase 1 (glucuronosyltransferase P) b
ENSDARG00000030733	1202.04	0.429933	0.0906225	4.74422	2.09308e-06	2.28761e-05	2536	2150	2065	1820	1748.3	1522.29	1263.31	1164.39	b3gat2	beta-1,3-glucuronyltransferase 2 (glucuronosyltransferase S)
ENSDARG00000001939	235.254	0.0434571	0.157152	0.276529	0.782142	0.892992	344	339	341	398	237.15	240.026	208.614	254.631	b3gat3	beta-1,3-glucuronyltransferase 3 (glucuronosyltransferase I)
ENSDARG00000073917	349.808	-0.393491	0.137289	-2.86616	0.00415483	0.019783	246	242	366	350	169.59	171.346	223.909	223.921	b3glcta	beta 3-glucosyltransferase a
ENSDARG00000077740	100.737	0.653141	0.191822	3.40493	0.000661805	0.00406969	183	186	129	133	126.159	131.696	78.9187	85.0901	b3glctb	beta 3-glucosyltransferase b
ENSDARG00000052376	8.18316	-0.118924	0.713531	-0.16667	0.86763	0.940106	15	14	13	22	10.3409	9.91259	7.95305	14.0751	b3gnt2a	UDP-GlcNAc:betaGal beta-1,3-N-acetylglucosaminyltransferase 2a
ENSDARG00000091902	353.162	-0.929444	0.145007	-6.40965	1.4585e-10	2.9357e-09	576	500	1183	1105	397.089	354.021	723.727	706.952	b3gnt2b	UDP-GlcNAc:betaGal beta-1,3-N-acetylglucosaminyltransferase 2b
ENSDARG00000068219	114.4	-0.920513	0.488877	-1.88291	0.059712	0.16879	190	262	520	439	130.984	185.507	318.122	280.861	b3gnt2l	UDP-GlcNAc:betaGal beta-1,3-N-acetylglucosaminyltransferase 2, like
ENSDARG00000058100	208.903	-1.3391	0.163323	-8.19908	2.42239e-16	8.39813e-15	338	339	970	943	233.014	240.026	593.42	603.308	b3gnt3	UDP-GlcNAc:betaGal beta-1,3-N-acetylglucosaminyltransferase 3
ENSDARG00000018971	158.799	-0.0276268	0.168869	-0.163599	0.870047	0.940939	411	350	421	444	283.34	247.815	257.556	284.06	b3gnt5a	UDP-GlcNAc:betaGal beta-1,3-N-acetylglucosaminyltransferase 5a
ENSDARG00000004396	9.11459	-1.02968	0.714661	-1.4408	0.149642	0.32918	22	10	19	53	15.1666	7.08042	11.6237	33.9081	b3gnt5b	UDP-GlcNAc:betaGal beta-1,3-N-acetylglucosaminyltransferase 5b
ENSDARG00000038489	7.52606	-0.964153	0.714047	-1.35027	0.176931	0.367991	8	9	17	20	5.51513	6.37238	10.4001	12.7955	b3gnt7	UDP-GlcNAc:betaGal beta-1,3-N-acetylglucosaminyltransferase 7
ENSDARG00000053133	205.66	0.143973	0.18211	0.790582	0.429188	0.64443	129	133	140	125	88.9314	94.1696	85.6482	79.9719	b3gnt7l	UDP-GlcNAc:betaGal beta-1,3-N-acetylglucosaminyltransferase 7, like
ENSDARG00000041616	5.09952	0.0601143	0.937952	0.064091	0.948898	0.975858	9	8	3	15	6.20452	5.66433	1.83532	9.59663	b3gnt9	UDP-GlcNAc:betaGal beta-1,3-N-acetylglucosaminyltransferase 9
ENSDARG00000043431	10.5736	0.944301	0.701791	1.34556	0.178445	0.369808	24	19	15	10	16.5454	13.4528	9.17659	6.39775	b3gntl1	UDP-GlcNAc:betaGal beta-1,3-N-acetylglucosaminyltransferase-like 1
ENSDARG00000061520	124.002	-0.857803	0.215222	-3.98567	6.72899e-05	0.000536599	140	109	271	233	96.5147	77.1766	165.79	149.068	b4galnt1a	beta-1,4-N-acetyl-galactosaminyl transferase 1a
ENSDARG00000077352	109.891	0.117653	0.241408	0.487362	0.626002	0.796764	232	226	201	269	159.939	160.017	122.966	172.1	b4galnt1b	beta-1,4-N-acetyl-galactosaminyl transferase 1b
ENSDARG00000094579	0.748125	1.27588	2.97625	0.428687	0.668151		3	8	0	5	2.06817	5.66433	0	3.19888	b4galnt2.1	beta-1,4-N-acetyl-galactosaminyl transferase 2, tandem duplicate 1
ENSDARG00000070605	0.788038	-0.0566373	2.19496	-0.0258034	0.979414		4	2	5	2	2.75756	1.41608	3.05886	1.27955	b4galnt2.2	beta-1,4-N-acetyl-galactosaminyl transferase 2, tandem duplicate 2
ENSDARG00000078749	0.517824	-1.40713	3.30644	-0.425573	0.670419		0	1	2	1	0	0.708042	1.22355	0.639775	b4galnt3a	beta-1,4-N-acetyl-galactosaminyl transferase 3a
ENSDARG00000058939	4.64606	-0.737348	1.17422	-0.627949	0.530037	0.728549	1	8	12	5	0.689391	5.66433	7.34127	3.19888	b4galnt3b	beta-1,4-N-acetyl-galactosaminyl transferase 3b
ENSDARG00000046150	312.758	0.20908	0.145436	1.43761	0.150544	0.330524	656	695	694	613	452.24	492.089	424.57	392.182	b4galnt4a	beta-1,4-N-acetyl-galactosaminyl transferase 4a
ENSDARG00000076701	445.94	0.0365428	0.0958357	0.381307	0.702976	0.84746	1310	1240	1406	1370	903.102	877.972	860.152	876.492	b4galnt4b	beta-1,4-N-acetyl-galactosaminyl transferase 4b
ENSDARG00000002634	77.7878	-1.22044	0.252507	-4.83331	1.34283e-06	1.51653e-05	99	96	246	261	68.2497	67.972	150.496	166.981	b4galt1	UDP-Gal:betaGlcNAc beta 1,4- galactosyltransferase, polypeptide 1
ENSDARG00000104404	116.793	-1.02774	0.204531	-5.02489	5.03731e-07	6.16486e-06	110	159	296	317	75.833	112.579	181.085	202.809	b4galt1l	DP-Gal:betaGlcNAc beta 1,4- galactosyltransferase, polypeptide 1, like
ENSDARG00000077994	219.147	-0.218784	0.161996	-1.35055	0.176838	0.367893	360	376	516	442	248.181	266.224	315.675	282.781	b4galt2	UDP-Gal:betaGlcNAc beta 1,4- galactosyltransferase, polypeptide 2
ENSDARG00000062329	177.986	0.0376253	0.192708	0.195245	0.845201	0.928925	248	288	304	280	170.969	203.916	185.979	179.137	b4galt3	UDP-Gal:betaGlcNAc beta 1,4- galactosyltransferase, polypeptide 3
ENSDARG00000104042	83.2996	-0.357793	0.270202	-1.32417	0.185447	0.379504	70	69	103	96	48.2574	48.8549	63.0126	61.4184	b4galt4	UDP-Gal:betaGlcNAc beta 1,4- galactosyltransferase, polypeptide 4
ENSDARG00000037815	78.3606	-0.624309	0.23529	-2.65336	0.00796957	0.0338097	133	131	217	237	91.689	92.7535	132.755	151.627	b4galt5	UDP-Gal:betaGlcNAc beta 1,4- galactosyltransferase, polypeptide 5
ENSDARG00000010301	1414.6	0.236947	0.0719408	3.29364	0.000989006	0.00577398	2914	2878	2944	2551	2008.89	2037.74	1801.06	1632.07	b4galt6	UDP-Gal:betaGlcNAc beta 1,4- galactosyltransferase, polypeptide 6
ENSDARG00000021899	202.98	-0.133439	0.166655	-0.800689	0.423312	0.639666	202	164	261	188	139.257	116.119	159.673	120.278	b4galt7	xylosylprotein beta 1,4-galactosyltransferase, polypeptide 7 (galactosyltransferase I)
ENSDARG00000077583	45.7251	0.54689	0.340978	1.60389	0.108739	0.263531	77	91	48	80	53.0831	64.4318	29.3651	51.182	b4gat1	beta-1,4-glucuronyltransferase 1
ENSDARG00000011727	196.958	0.226314	0.193025	1.17246	0.241013	0.45122	282	226	232	252	194.408	160.017	141.931	161.223	b9d1	B9 protein domain 1
ENSDARG00000017385	70.7637	0.0795762	0.274031	0.290391	0.771517	0.887023	96	79	100	85	66.1815	55.9353	61.1773	54.3809	b9d2	B9 protein domain 2
ENSDARG00000089087	192.422	-1.15898	0.184941	-6.26673	3.68697e-10	7.07449e-09	324	343	744	916	223.363	242.858	455.159	586.034	ba1	ba1 globin
ENSDARG00000097238	28.3455	-1.03612	0.378774	-2.73546	0.00622937	0.0276406	53	63	111	154	36.5377	44.6066	67.9068	98.5254	ba2	ba2 globin
ENSDARG00000077526	270.328	0.236081	0.140011	1.68616	0.0917648	0.231948	402	351	374	340	277.135	248.523	228.803	217.524	babam1	BRISC and BRCA1 A complex member 1
ENSDARG00000062553	200.328	-0.161816	0.182524	-0.886547	0.375323	0.595154	257	260	327	319	177.173	184.091	200.05	204.088	bach1a	BTB and CNC homology 1, basic leucine zipper transcription factor 1 a
ENSDARG00000002196	195.574	-0.65704	0.209625	-3.13436	0.0017223	0.00935678	386	336	680	592	266.105	237.902	416.005	378.747	bach1b	BTB and CNC homology 1, basic leucine zipper transcription factor 1 b
ENSDARG00000036569	144.786	0.941699	0.199542	4.71931	2.36643e-06	2.55756e-05	229	250	153	126	157.871	177.01	93.6012	80.6117	bach2a	BTB and CNC homology 1, basic leucine zipper transcription factor 2a
ENSDARG00000004074	134.994	0.574189	0.184755	3.10784	0.00188463	0.0101355	219	276	196	176	150.977	195.42	119.907	112.6	bach2b	BTB and CNC homology 1, basic leucine zipper transcription factor 2b
ENSDARG00000087993	882.004	0.416839	0.080732	5.16324	2.4271e-07	3.1395e-06	1698	1605	1471	1294	1170.59	1136.41	899.918	827.869	bada	BCL2-associated agonist of cell death a
ENSDARG00000054937	267.299	-0.502046	0.133594	-3.75801	0.000171271	0.0012357	266	251	428	390	183.378	177.718	261.839	249.512	badb	BCL2-associated agonist of cell death b
ENSDARG00000020895	350.456	0.0850511	0.118801	0.715915	0.474044	0.683063	644	660	660	712	443.968	467.308	403.77	455.52	bag1	BCL2-associated athanogene 1
ENSDARG00000035005	235.977	-1.24876	0.322234	-3.87534	0.000106477	0.000809516	15	17	49	36	10.3409	12.0367	29.9769	23.0319	bag2	BCL2-associated athanogene 2
ENSDARG00000039486	2780.93	0.232783	0.0640106	3.63663	0.000276231	0.00188172	1419	1317	1328	1272	978.246	932.491	812.434	813.794	bag3	BCL2-associated athanogene 3
ENSDARG00000043179	195.276	0.202035	0.187531	1.07734	0.281329	0.498345	242	203	228	204	166.833	143.732	139.484	130.514	bag4	BCL2-associated athanogene 4
ENSDARG00000017316	132.821	0.296609	0.202118	1.4675	0.14224	0.317841	188	251	209	191	129.605	177.718	127.86	122.197	bag5	BCL2-associated athanogene 5
ENSDARG00000075892	584.091	-0.23771	0.127337	-1.86678	0.0619316	0.173617	599	575	817	730	412.945	407.124	499.818	467.036	bag6	BCL2-associated athanogene 6
ENSDARG00000077531	213.972	-0.0224535	0.177966	-0.126167	0.8996	0.9542	185	204	208	233	127.537	144.441	127.249	149.068	bag6l	BCL2-associated athanogene 6, like
ENSDARG00000080009	394.46	0.49096	0.152343	3.22272	0.00126979	0.00718538	878	744	737	554	605.285	526.783	450.876	354.436	bahcc1b	BAH domain and coiled-coil containing 1b
ENSDARG00000086789	564.743	0.226272	0.100551	2.25033	0.0244283	0.0841787	1181	1211	1209	1077	814.171	857.439	739.633	689.038	bahd1	bromo adjacent homology domain containing 1
ENSDARG00000062799	482.196	-0.276544	0.100393	-2.75461	0.00587614	0.0263665	826	780	1126	1047	569.437	552.273	688.856	669.845	baiap2a	BAI1-associated protein 2a
ENSDARG00000103333	506.595	0.501897	0.099269	5.05592	4.28312e-07	5.29342e-06	1263	1194	1001	937	870.701	845.402	612.384	599.47	baiap2b	BAI1-associated protein 2b
ENSDARG00000029305	28.4772	-0.139272	0.380571	-0.365955	0.714399	0.854908	84	65	119	65	57.9088	46.0227	72.801	41.5854	baiap2l1a	BAI1-associated protein 2-like 1a
ENSDARG00000031119	116.36	-0.574777	0.284428	-2.02082	0.0432986	0.131909	76	28	73	99	52.3937	19.8252	44.6594	63.3378	baiap2l1b	BAI1-associated protein 2-like 1b
ENSDARG00000016483	19.706	-0.386011	0.495159	-0.77957	0.435644	0.650102	29	34	46	46	19.9923	24.0734	28.1415	29.4297	baiap2l2a	BAI1-associated protein 2-like 2a
ENSDARG00000060933	14.4612	-1.97339	0.684137	-2.88449	0.00392045	0.01884	6	20	68	47	4.13635	14.1608	41.6005	30.0694	baiap2l2b	BAI1-associated protein 2-like 2b
ENSDARG00000079264	106.431	0.353751	0.232648	1.52054	0.128375	0.296259	419	259	301	290	288.855	183.383	184.144	185.535	baiap3	BAI1-associated protein 3
ENSDARG00000055381	207.177	-0.0091836	0.165319	-0.0555507	0.9557	0.979397	583	477	574	615	401.915	337.736	351.158	393.462	bambia	BMP and activin membrane-bound inhibitor (Xenopus laevis) homolog a
ENSDARG00000099677	42.733	0.0455463	0.384968	0.118312	0.905821	0.957649	51	48	51	56	35.1589	33.986	31.2004	35.8274	bambib	BMP and activin membrane-bound inhibitor homolog (Xenopus laevis) b
ENSDARG00000037009	895.076	-0.00229414	0.0906342	-0.0253121	0.979806	0.990043	1293	1205	1432	1362	891.383	853.19	876.059	871.374	banf1	barrier to autointegration factor 1
ENSDARG00000017562	307.64	0.333719	0.138456	2.41028	0.0159401	0.0596907	499	530	455	457	344.006	375.262	278.357	292.377	banp	BTG3 associated nuclear protein
ENSDARG00000063051	305.999	0.0199304	0.126433	0.157636	0.874743	0.943157	416	451	502	454	286.787	319.327	307.11	290.458	bap1	BRCA1 associated protein-1 (ubiquitin carboxy-terminal hydrolase)
ENSDARG00000076733	16.8289	1.45065	0.701281	2.06857	0.0385868	0.120671	12	15	3	8	8.27269	10.6206	1.83532	5.1182	bard1	BRCA1 associated RING domain 1
ENSDARG00000035508	463.43	1.01611	0.118303	8.58905	8.76892e-18	3.38031e-16	1836	1767	973	1015	1265.72	1251.11	595.255	649.372	barhl1a	BarH-like homeobox 1a
ENSDARG00000019013	176.102	0.663365	0.16694	3.97366	7.07757e-05	0.000561265	510	506	378	339	351.589	358.269	231.25	216.884	barhl1b	BarH-like homeobox 1b
ENSDARG00000104361	284.118	0.279841	0.133408	2.09763	0.0359382	0.114078	641	549	587	508	441.9	388.715	359.111	325.006	barhl2	BarH-like homeobox 2
ENSDARG00000007407	1.51846	2.33444	1.76047	1.32603	0.18483		3	6	1	1	2.06817	4.24825	0.611773	0.639775	barx1	BARX homeobox 1
ENSDARG00000041098	0.166104	-1.31034	6.76358	-0.193734	0.846384		0	0	0	1	0	0	0	0.639775	barx2	BARX homeobox 2
ENSDARG00000053358	4005.51	0.467008	0.0565112	8.26398	1.4089e-16	5.00639e-15	12719	11786	10115	9680	8768.36	8344.98	6188.08	6193.03	basp1	brain abundant, membrane attached signal protein 1
ENSDARG00000011818	35.9045	0.314839	0.364202	0.864462	0.387334	0.606623	49	79	52	63	33.7802	55.9353	31.8122	40.3058	batf	basic leucine zipper transcription factor, ATF-like
ENSDARG00000042577	30.3796	0.177999	0.381934	0.466046	0.641183	0.807424	36	42	37	40	24.8181	29.7378	22.6356	25.591	batf3	basic leucine zipper transcription factor, ATF-like 3
ENSDARG00000020623	452.451	0.0918047	0.115101	0.797601	0.425102	0.641086	675	807	769	785	465.339	571.39	470.453	502.224	baxa	bcl2-associated X protein, a
ENSDARG00000030881	196.672	-1.09298	0.170317	-6.41734	1.38675e-10	2.79654e-09	219	248	557	556	150.977	175.594	340.757	355.715	baxb	bcl2-associated X protein, b
ENSDARG00000099745	299.439	-0.383534	0.137246	-2.79451	0.00519787	0.0238619	413	390	574	595	284.718	276.136	351.158	380.666	baz1a	bromodomain adjacent to zinc finger domain, 1A
ENSDARG00000102832	1322.02	0.31156	0.113262	2.7508	0.00594507	0.0266058	2438	2702	2375	2255	1680.74	1913.13	1452.96	1442.69	baz1b	bromodomain adjacent to zinc finger domain, 1B
ENSDARG00000102974	734.638	0.36869	0.112889	3.26595	0.00109099	0.00627671	1534	1535	1351	1304	1057.53	1086.84	826.505	834.267	baz2a	bromodomain adjacent to zinc finger domain, 2A
ENSDARG00000057782	1328.05	0.227769	0.0944781	2.41081	0.015917	0.0596251	2808	2813	2535	2819	1935.81	1991.72	1550.84	1803.53	baz2ba	bromodomain adjacent to zinc finger domain, 2Ba
ENSDARG00000069282	223.601	0.425666	0.147503	2.88582	0.00390396	0.018765	518	442	416	382	357.105	312.954	254.497	244.394	bbc3	BCL2 binding component 3
ENSDARG00000071046	462.812	-0.175711	0.13445	-1.30689	0.19125	0.38681	439	417	529	550	302.643	295.253	323.628	351.876	bbip1	BBSome interacting protein 1
ENSDARG00000036135	789.222	-0.220613	0.093752	-2.35316	0.0186146	0.0676768	531	477	689	623	366.067	337.736	421.511	398.58	bbox1	butyrobetaine (gamma), 2-oxoglutarate dioxygenase (gamma-butyrobetaine hydroxylase) 1
ENSDARG00000075169	82.4724	-0.305847	0.271679	-1.12576	0.260265	0.474899	68	92	106	115	46.8786	65.1398	64.8479	73.5742	bbs1	Bardet-Biedl syndrome 1
ENSDARG00000069515	47.0269	0.0135946	0.32202	0.0422166	0.966326	0.983834	65	51	58	70	44.8104	36.1101	35.4828	44.7843	bbs10	Bardet-Biedl syndrome 10
ENSDARG00000016112	42.4143	0.316738	0.383025	0.826938	0.408272	0.626639	87	58	73	57	59.977	41.0664	44.6594	36.4672	bbs12	Bardet-Biedl syndrome 12
ENSDARG00000041621	249.826	-0.10383	0.139745	-0.742999	0.457482	0.668178	326	309	387	375	224.741	218.785	236.756	239.916	bbs2	Bardet-Biedl syndrome 2
ENSDARG00000063522	80.6527	-0.0914659	0.25428	-0.359706	0.719067	0.857229	104	95	129	108	71.6967	67.264	78.9187	69.0957	bbs4	Bardet-Biedl syndrome 4
ENSDARG00000039827	226.446	0.109313	0.135373	0.807496	0.419381	0.635875	414	431	410	464	285.408	305.166	250.827	296.856	bbs5	Bardet-Biedl syndrome 5
ENSDARG00000059911	233.337	-0.138742	0.165357	-0.839046	0.401444	0.619811	229	197	282	242	157.871	139.484	172.52	154.826	bbs7	Bardet-Biedl syndrome 7
ENSDARG00000079217	145.492	-0.03106	0.205245	-0.151331	0.879715	0.94541	248	218	313	220	170.969	154.353	191.485	140.751	bbs9	Bardet-Biedl syndrome 9
ENSDARG00000012699	235.497	0.0572728	0.13818	0.414479	0.678524	0.831584	474	434	516	459	326.771	307.29	315.675	293.657	bbx	BBX, HMG-box containing
ENSDARG00000053979	2303.73	-0.466034	0.0603824	-7.71804	1.18132e-14	3.59889e-13	3310	3018	5108	4656	2281.88	2136.87	3124.93	2978.79	bc2	putative breast adenocarcinoma marker
ENSDARG00000090190	578.947	0.349221	0.0907432	3.84845	0.000118866	0.00089447	1464	1402	1294	1219	1009.27	992.675	791.634	779.886	bcam	basal cell adhesion molecule (Lutheran blood group)
ENSDARG00000099412	2730.81	-0.586565	0.0763387	-7.68371	1.54548e-14	4.66835e-13	794	853	1428	1336	547.376	603.96	873.611	854.74	bcan	brevican
ENSDARG00000016231	221.09	0.0698356	0.152646	0.4575	0.647312	0.810934	305	359	354	353	210.264	254.187	216.568	225.841	bcap29	B-cell receptor-associated protein 29
ENSDARG00000044972	901.976	-0.139364	0.0881833	-1.58039	0.114019	0.272552	718	733	900	885	494.983	518.995	550.595	566.201	bcap31	B-cell receptor-associated protein 31
ENSDARG00000056525	180.945	-0.0803113	0.16913	-0.47485	0.634894	0.802343	406	448	485	523	279.893	317.203	296.71	334.603	bcar1	breast cancer anti-estrogen resistance 1
ENSDARG00000016981	153.51	0.299138	0.173817	1.721	0.0852513	0.219829	440	379	381	362	303.332	268.348	233.085	231.599	bcar3	breast cancer anti-estrogen resistance 3
ENSDARG00000043631	1330.93	0.0100749	0.0848142	0.118788	0.905443	0.957576	1133	1147	1312	1218	781.08	812.124	802.646	779.246	bcas2	BCAS2, pre-mRNA processing factor
ENSDARG00000090764	351.145	0.262035	0.137381	1.90736	0.0564739	0.161648	511	616	540	511	352.279	436.154	330.357	326.925	bcas3	breast carcinoma amplified sequence 3
ENSDARG00000045568	813.492	0.0643169	0.100495	0.639998	0.522174	0.722204	1895	1684	1976	1846	1306.4	1192.34	1208.86	1181.03	bcat1	branched chain amino-acid transaminase 1, cytosolic
ENSDARG00000054849	1480.98	0.160119	0.0738712	2.16754	0.0301936	0.0993551	1713	1689	1714	1686	1180.93	1195.88	1048.58	1078.66	bcat2	branched chain amino-acid transaminase 2, mitochondrial
ENSDARG00000004948	779.911	0.193477	0.0885172	2.18575	0.0288336	0.0958547	1061	1043	1076	980	731.444	738.488	658.267	626.98	bccip	BRCA2 and CDKN1A interacting protein
ENSDARG00000092996	16.4572	0.337725	0.499488	0.676141	0.498951	0.703798	32	43	22	44	22.0605	30.4458	13.459	28.1501	bcdin3d	BCDIN3 domain containing
ENSDARG00000040555	1216.86	0.00289868	0.100809	0.0287543	0.977061	0.988854	744	701	901	712	512.907	496.337	551.207	455.52	bckdha	branched chain keto acid dehydrogenase E1, alpha polypeptide
ENSDARG00000014676	659.818	-0.198927	0.112519	-1.76794	0.0770716	0.204338	465	427	607	537	320.567	302.334	371.346	343.559	bckdhb	branched chain keto acid dehydrogenase E1, beta polypeptide
ENSDARG00000093569	990.181	-1.65454	0.131515	-12.5806	2.7006e-36	2.68252e-34	147	151	502	545	101.34	106.914	307.11	348.678	bckdhbl	branched chain keto acid dehydrogenase E1, beta polypeptide, like
ENSDARG00000016904	874.764	-0.0835227	0.0916898	-0.910926	0.362334	0.582962	1040	951	1187	1168	716.967	673.348	726.174	747.258	bckdk	branched chain ketoacid dehydrogenase kinase
ENSDARG00000077130	104.208	-1.10171	0.25191	-4.37342	1.22313e-05	0.000115734	210	183	495	447	144.772	129.572	302.827	285.98	bcl10	B-cell CLL/lymphoma 10
ENSDARG00000061352	177.537	0.36982	0.160054	2.31059	0.0208555	0.0742068	488	505	422	436	336.423	357.561	258.168	278.942	bcl11aa	B-cell CLL/lymphoma 11Aa
ENSDARG00000063153	35.9789	-0.297915	0.364415	-0.817516	0.413634	0.631104	36	38	64	38	24.8181	26.9056	39.1535	24.3115	bcl11ab	B-cell CLL/lymphoma 11Ab
ENSDARG00000062510	514.64	0.225021	0.11624	1.93584	0.0528875	0.153627	1415	1430	1407	1313	975.488	1012.5	860.764	840.025	bcl11ba	B-cell CLL/lymphoma 11Ba (zinc finger protein)
ENSDARG00000094704	339.049	0.0749329	0.116101	0.645409	0.518662	0.719817	617	573	688	575	425.354	405.708	420.9	367.871	bcl2a	B-cell CLL/lymphoma 2a
ENSDARG00000089109	770.482	0.348984	0.099251	3.51618	0.000437812	0.00281539	2383	2249	2147	1917	1642.82	1592.39	1313.48	1226.45	bcl2b	B-cell CLL/lymphoma 2b
ENSDARG00000008434	1721.58	-0.18129	0.0685409	-2.64499	0.00816933	0.0344587	1924	1705	2381	2214	1326.39	1207.21	1456.63	1416.46	bcl2l1	bcl2-like 1
ENSDARG00000026766	1918.68	-0.3269	0.0607951	-5.37708	7.57019e-08	1.07027e-06	3164	3094	4521	4248	2181.23	2190.68	2765.82	2717.77	bcl2l10	BCL2-like 10 (apoptosis facilitator)
ENSDARG00000079144	41.0306	-0.0859169	0.319156	-0.269201	0.787775	0.896262	62	57	71	70	42.7422	40.3584	43.4359	44.7843	bcl2l11	BCL2-like 11
ENSDARG00000062370	231.375	-0.425846	0.19337	-2.20224	0.0276483	0.0926134	280	268	469	355	193.029	189.755	286.921	227.12	bcl2l13	BCL2-like 13 (apoptosis facilitator)
ENSDARG00000099128	1.9724	3.27107	1.73987	1.88006	0.0600999		4	13	2	0	2.75756	9.20454	1.22355	0	bcl2l16	BCL2-like 16
ENSDARG00000087832	102.809	-0.301703	0.223086	-1.3524	0.176246	0.366997	161	207	222	284	110.992	146.565	135.814	181.696	bcl3	B-cell CLL/lymphoma 3
ENSDARG00000070864	943.85	-0.0816373	0.0845419	-0.965643	0.334223	0.55604	1484	1409	1805	1616	1023.06	997.631	1104.25	1033.88	bcl6a	B-cell CLL/lymphoma 6a (zinc finger protein 51)
ENSDARG00000069295	740.982	-0.281331	0.0951791	-2.95581	0.00311851	0.0154917	1015	876	1331	1235	699.732	620.245	814.269	790.123	bcl6ab	B-cell CLL/lymphoma 6a, genome duplicate b
ENSDARG00000069335	54.1173	-2.09489	0.301204	-6.95505	3.52443e-12	8.54345e-11	71	36	281	229	48.9468	25.4895	171.908	146.509	bcl6b	B-cell CLL/lymphoma 6, member B
ENSDARG00000052907	895.608	-0.0529364	0.106109	-0.498888	0.617858	0.791089	1278	1089	1493	1251	881.042	771.058	913.377	800.359	bcl7a	B-cell CLL/lymphoma 7A
ENSDARG00000100611	247.679	-0.455325	0.200821	-2.26732	0.0233705	0.0813795	174	100	224	195	119.954	70.8042	137.037	124.756	bcl7ba	B-cell CLL/lymphoma 7B, a
ENSDARG00000040396	320.28	-0.286558	0.157926	-1.81451	0.0695988	0.189562	294	257	346	403	202.681	181.967	211.673	257.829	bcl7bb	B-cell CLL/lymphoma 7B, b
ENSDARG00000036687	201.98	0.424184	0.174726	2.42771	0.0151943	0.0574625	335	368	283	302	230.946	260.559	173.132	193.212	bcl9	B-cell CLL/lymphoma 9
ENSDARG00000055054	295.109	-0.025051	0.158346	-0.158204	0.874296	0.942956	542	602	662	639	373.65	426.241	404.994	408.816	bcl9l	B-cell CLL/lymphoma 9-like
ENSDARG00000104256	19.0132	-1.24795	0.840325	-1.48508	0.137524	0.310105	4	2	13	3	2.75756	1.41608	7.95305	1.91933	bco1	beta-carotene oxygenase 1
ENSDARG00000103659	16.8814	-0.523595	0.709669	-0.737802	0.460635	0.670905	8	2	7	9	5.51513	1.41608	4.28241	5.75798	bco1l	beta-carotene oxygenase 1, like
ENSDARG00000055722	211.913	1.15095	0.174143	6.60922	3.86338e-11	8.38478e-10	389	334	206	158	268.173	236.486	126.025	101.085	bco2a	beta-carotene oxygenase 2a
ENSDARG00000041715	3.35892	0.0375359	1.24131	0.0302389	0.975877		8	2	11	0	5.51513	1.41608	6.7295	0	bco2b	beta-carotene oxygenase 2b
ENSDARG00000027620	18.0951	-0.78778	0.549113	-1.43464	0.15139	0.331462	17	22	30	45	11.7196	15.5769	18.3532	28.7899	bco2l	beta-carotene 15, 15-dioxygenase 2, like
ENSDARG00000017798	349.466	0.120659	0.157934	0.763985	0.444876	0.657266	601	585	639	580	414.324	414.204	390.923	371.07	bcor	BCL6 corepressor
ENSDARG00000077912	598.171	0.209846	0.134585	1.55921	0.118947	0.280998	915	988	1047	796	630.793	699.545	640.526	509.261	bcorl1	BCL6 corepressor-like 1
ENSDARG00000079286	164.278	0.412248	0.169869	2.42686	0.01523	0.0575465	331	329	283	271	228.188	232.946	173.132	173.379	bcr	breakpoint cluster region
ENSDARG00000012295	96.623	0.0852125	0.246065	0.346301	0.729116	0.863709	87	107	123	82	59.977	75.7605	75.248	52.4616	bcs1l	BC1 (ubiquinol-cytochrome c reductase) synthesis-like
ENSDARG00000059388	132.922	-0.213521	0.20623	-1.03535	0.300506	0.519874	92	103	142	111	63.424	72.9283	86.8717	71.0151	bdh1	3-hydroxybutyrate dehydrogenase, type 1
ENSDARG00000052696	264.591	-0.451708	0.184273	-2.45129	0.0142344	0.0544589	179	114	202	244	123.401	80.7168	123.578	156.105	bdh2	3-hydroxybutyrate dehydrogenase, type 2
ENSDARG00000020744	0.138136	-0.815947	6.69033	-0.121959	0.902931		1	0	2	0	0.689391	0	1.22355	0	bdkrb1	bradykinin receptor B1
ENSDARG00000079942	0.652464	-0.399608	2.75146	-0.145235	0.884525		1	1	3	0	0.689391	0.708042	1.83532	0	bdkrb2	bradykinin receptor B2
ENSDARG00000018817	117.097	0.939608	0.178026	5.27791	1.30663e-07	1.7853e-06	590	539	330	327	406.741	381.635	201.885	209.207	bdnf	brain-derived neurotrophic factor
ENSDARG00000087413	273.14	0.467125	0.130257	3.58619	0.000335549	0.00223867	986	979	815	773	679.739	693.173	498.595	494.546	bean1	brain expressed, associated with NEDD4, 1
ENSDARG00000079128	762.223	0.147718	0.0929823	1.58866	0.112136	0.269133	1068	1081	1134	1034	736.27	765.393	693.75	661.528	becn1	beclin 1, autophagy related
ENSDARG00000076903	202.325	-0.0762821	0.195798	-0.389597	0.696835	0.842957	232	291	296	320	159.939	206.04	181.085	204.728	bend3	BEN domain containing 3
ENSDARG00000075624	71.8345	0.0502223	0.247709	0.202748	0.839332	0.926036	121	136	129	148	83.4163	96.2937	78.9187	94.6868	bend5	BEN domain containing 5
ENSDARG00000078331	12.8537	-0.605732	0.705076	-0.859102	0.390284	0.609322	17	17	35	23	11.7196	12.0367	21.412	14.7148	best1	bestrophin 1
ENSDARG00000034885	103.694	0.019281	0.217257	0.0887474	0.929283	0.967601	125	102	128	122	86.1739	72.2203	78.3069	78.0526	bet1	Bet1 golgi vesicular membrane trafficking protein
ENSDARG00000032037	159.987	0.20175	0.228161	0.884245	0.376564	0.596182	133	179	171	133	91.689	126.739	104.613	85.0901	bet1l	Bet1 golgi vesicular membrane trafficking protein-like
ENSDARG00000005616	0.131339	2.60205	6.68935	0.388984	0.697288		1	1	0	0	0.689391	0.708042	0	0	bfb	complement component bfb
ENSDARG00000011998	2.71847	-0.824556	1.21958	-0.676097	0.498979		1	7	10	6	0.689391	4.95629	6.11773	3.83865	bfsp2	beaded filament structural protein 2, phakinin
ENSDARG00000058414	0.320077	-4.11336	5.04654	-0.815085	0.415024		0	0	1	6	0	0	0.611773	3.83865	bglap	bone gamma-carboxyglutamate (gla) protein
ENSDARG00000104467	16.8941	-0.162573	0.449108	-0.361992	0.717358	0.856195	70	48	69	78	48.2574	33.986	42.2123	49.9025	bglapl	bone gamma-carboxyglutamate (gla) protein, like
ENSDARG00000017884	8.04703	-0.985753	0.71536	-1.37798	0.168209	0.355839	17	21	39	45	11.7196	14.8689	23.8591	28.7899	bgna	biglycan a
ENSDARG00000002945	214.026	-0.753636	0.172513	-4.36856	1.25068e-05	0.000118027	131	115	268	196	90.3102	81.4248	163.955	125.396	bgnb	biglycan b
ENSDARG00000045166	0.776221	0.556681	2.57785	0.215947	0.829029		1	3	0	3	0.689391	2.12413	0	1.91933	bhlha15	basic helix-loop-helix family, member a15
ENSDARG00000103981	0						0	0	0	0	0	0	0	0	bhlha9	basic helix-loop-helix family, member a9
ENSDARG00000058039	216.039	0.501788	0.163667	3.06592	0.00217003	0.0114453	480	459	361	379	330.908	324.991	220.85	242.475	bhlhe22	basic helix-loop-helix family, member e22
ENSDARG00000037588	201.097	0.588446	0.16735	3.51626	0.000437679	0.00281538	443	363	331	268	305.4	257.019	202.497	171.46	bhlhe23	basic helix-loop-helix family, member e23
ENSDARG00000004060	10310.5	0.0723593	0.0445367	1.62471	0.104224	0.254959	24253	23294	25958	24552	16719.8	16493.1	15880.4	15707.8	bhlhe40	basic helix-loop-helix family, member e40
ENSDARG00000041691	3742.68	-0.850489	0.0616037	-13.8058	2.35102e-43	2.83663e-41	5935	5910	12499	11372	4091.54	4184.53	7646.55	7275.53	bhlhe41	basic helix-loop-helix family, member e41
ENSDARG00000013430	82.1753	-0.631193	0.247144	-2.55395	0.010651	0.0429742	230	185	312	403	158.56	130.988	190.873	257.829	bhmt	betaine-homocysteine methyltransferase
ENSDARG00000061682	31.0149	-0.255918	0.48089	-0.532175	0.594605	0.775521	27	17	44	15	18.6136	12.0367	26.918	9.59663	bicc1a	BicC family RNA binding protein 1a
ENSDARG00000070497	26.0773	-0.14208	0.422505	-0.33628	0.73666	0.867996	30	54	58	46	20.6817	38.2343	35.4828	29.4297	bicc1b	BicC family RNA binding protein 1b
ENSDARG00000076557	129.062	0.47814	0.383019	1.24835	0.211904	0.41465	29	16	15	21	19.9923	11.3287	9.17659	13.4353	bicc2	bicaudal C homolog 2
ENSDARG00000079496	98.4929	0.507498	0.199416	2.54492	0.0109303	0.0439351	288	309	231	238	198.545	218.785	141.319	152.267	bicd1a	bicaudal D homolog 1a
ENSDARG00000075571	167.154	0.425127	0.248422	1.71131	0.0870235	0.223239	125	104	85	105	86.1739	73.6363	52.0007	67.1764	bicd2	bicaudal D homolog 2 (Drosophila)
ENSDARG00000069290	242.46	-0.281432	0.161392	-1.74377	0.0811984	0.211782	301	326	418	433	207.507	230.822	255.721	277.023	bida	BH3 interacting domain death agonist
ENSDARG00000045549	70.4872	0.229844	0.265819	0.864662	0.387224	0.606584	186	144	135	178	128.227	101.958	82.5893	113.88	bik	BCL2-interacting killer (apoptosis-inducing)
ENSDARG00000058820	58.7182	-1.29207	0.29976	-4.31035	1.62995e-05	0.000150104	115	61	272	209	79.28	43.1905	166.402	133.713	bin1b	bridging integrator 1b
ENSDARG00000003219	4.52199	-5.44824	1.67937	-3.24422	0.00117773	0.00670887	0	0	11	7	0	0	6.7295	4.47843	bin2a	bridging integrator 2a
ENSDARG00000010255	315.707	-0.995444	0.141061	-7.05686	1.70312e-12	4.24904e-11	520	397	1058	982	358.483	281.093	647.256	628.259	bin2b	bridging integrator 2b
ENSDARG00000099651	178.881	0.187237	0.197004	0.950423	0.341897	0.56387	157	213	201	163	108.234	150.813	122.966	104.283	bin3	bridging integrator 3
ENSDARG00000044619	1053.89	-0.0954777	0.0766661	-1.24537	0.212996	0.416322	1346	1162	1584	1409	927.92	822.745	969.048	901.443	birc2	baculoviral IAP repeat containing 2
ENSDARG00000055655	0.405675	-0.856899	3.8151	-0.224607	0.822285		0	1	0	2	0	0.708042	0	1.27955	birc5b	baculoviral IAP repeat containing 5b
ENSDARG00000074166	420.27	0.355355	0.1069	3.32419	0.000886766	0.00525976	915	972	835	813	630.793	688.217	510.83	520.137	birc6	baculoviral IAP repeat containing 6
ENSDARG00000097706	512.457	0.392772	0.122025	3.21879	0.00128733	0.0072654	574	522	474	458	395.71	369.598	289.98	293.017	birc6-as2	birc6 antisense RNA 2
ENSDARG00000058082	25.2134	-0.488896	0.392675	-1.24504	0.213118	0.416409	44	42	75	60	30.3332	29.7378	45.883	38.3865	birc7	baculoviral IAP repeat containing 7
ENSDARG00000052073	697.295	0.0885627	0.0944197	0.937968	0.348261	0.569964	1009	900	984	1019	695.595	637.238	601.984	651.931	blcap	bladder cancer associated protein
ENSDARG00000043126	28.175	-0.0362217	0.415	-0.087281	0.930448	0.968183	88	92	125	82	60.6664	65.1398	76.4716	52.4616	blf	bloody fingers
ENSDARG00000007783	61.8567	0.226031	0.27898	0.810205	0.417822	0.634819	110	131	136	95	75.833	92.7535	83.2011	60.7787	blk	BLK proto-oncogene, Src family tyrosine kinase
ENSDARG00000077089	31.3561	0.743202	0.412089	1.8035	0.0713099	0.193052	44	46	28	32	30.3332	32.5699	17.1296	20.4728	blm	Bloom syndrome, RecQ helicase-like
ENSDARG00000025977	316.102	-0.308851	0.151226	-2.04231	0.0411208	0.126951	318	331	424	473	219.226	234.362	259.392	302.614	blmh	bleomycin hydrolase
ENSDARG00000042722	166.609	-0.63922	0.174298	-3.66739	0.00024504	0.00169345	298	312	528	533	205.439	220.909	323.016	341	blnk	B-cell linker
ENSDARG00000014171	275.122	-0.0122071	0.155336	-0.0785846	0.937363	0.970959	391	448	459	486	269.552	317.203	280.804	310.931	bloc1s1	biogenesis of lysosomal organelles complex-1, subunit 1
ENSDARG00000046081	307.456	-0.0933707	0.132097	-0.706833	0.47967	0.687275	349	336	443	374	240.597	237.902	271.015	239.276	bloc1s2	biogenesis of lysosomal organelles complex-1, subunit 2
ENSDARG00000068828	52.2526	-0.0322006	0.259769	-0.123959	0.901348	0.955249	88	82	95	99	60.6664	58.0594	58.1184	63.3378	bloc1s3	biogenesis of lysosomal organelles complex-1, subunit 3
ENSDARG00000007597	409.041	-0.0342714	0.1431	-0.239492	0.810724	0.909647	409	381	480	424	281.961	269.764	293.651	271.265	bloc1s4	biogenesis of lysosomal organelles complex-1, subunit 4, cappuccino
ENSDARG00000101294	139.427	0.120358	0.186501	0.645349	0.518701	0.719825	264	248	269	257	181.999	175.594	164.567	164.422	bloc1s5	biogenesis of lysosomal organelles complex-1, subunit 5, muted
ENSDARG00000042933	614.715	-0.17892	0.0999559	-1.78999	0.0734554	0.19705	1141	1018	1434	1296	786.595	720.787	877.282	829.149	bloc1s6	biogenesis of lysosomal organelles complex-1, subunit 6, pallidin
ENSDARG00000059857	189.412	0.483732	0.185418	2.60888	0.00908404	0.0377019	180	146	125	135	124.09	103.374	76.4716	86.3697	blvra	biliverdin reductase A
ENSDARG00000096829	293.328	-0.0437907	0.141667	-0.30911	0.757238	0.878536	230	241	261	281	158.56	170.638	159.673	179.777	blvrb	biliverdin reductase B
ENSDARG00000011299	125.075	-0.0276792	0.196526	-0.140843	0.887994	0.949767	211	203	231	240	145.461	143.732	141.319	153.546	blzf1	basic leucine zipper nuclear factor 1
ENSDARG00000096603	115.894	-0.147634	0.463802	-0.318313	0.750247	0.874358	10	11	15	11	6.89391	7.78846	9.17659	7.03753	bmb	brambleberry
ENSDARG00000090234	35.7552	-0.827472	0.381496	-2.16902	0.0300811	0.099089	20	34	47	60	13.7878	24.0734	28.7533	38.3865	bmf1	Bcl2 modifying factor 1
ENSDARG00000041414	246.018	0.184083	0.132181	1.39266	0.163722	0.34954	490	451	477	448	337.802	319.327	291.816	286.619	bmf2	Bcl2 modifying factor 2
ENSDARG00000006010	314.423	0.759801	0.155273	4.89331	9.9153e-07	1.15207e-05	568	454	392	283	391.574	321.451	239.815	181.056	bmi1a	bmi1 polycomb ring finger oncogene 1a
ENSDARG00000013076	639.854	0.424501	0.0910708	4.66122	3.14338e-06	3.32162e-05	1144	1045	927	894	788.663	739.904	567.113	571.959	bmi1b	bmi1 polycomb ring finger oncogene 1b
ENSDARG00000061769	0.956819	3.84327	2.41178	1.59354	0.111039		9	4	0	1	6.20452	2.83217	0	0.639775	bmp10	bone morphogenetic protein 10
ENSDARG00000045632	0.128568	-1.39947	6.66187	-0.210072	0.833612		0	1	2	1	0	0.708042	1.22355	0.639775	bmp10l	bone morphogenetic protein 10, like
ENSDARG00000037491	8.26925	0.792174	0.906292	0.874083	0.382073	0.601427	21	18	9	16	14.4772	12.7448	5.50595	10.2364	bmp15	bone morphogenetic protein 15
ENSDARG00000103679	61.455	-0.0436712	0.701851	-0.0622228	0.950385	0.976562	140	176	177	187	96.5147	124.615	108.284	119.638	bmp16	bone morphogenetic protein 16
ENSDARG00000028071	57.702	-0.0252091	0.317963	-0.079283	0.936808	0.970618	101	99	107	120	69.6285	70.0961	65.4597	76.773	bmp1a	bone morphogenetic protein 1a
ENSDARG00000028053	954.586	-1.21245	0.118236	-10.2545	1.12956e-24	6.87261e-23	314	281	742	796	216.469	198.96	453.935	509.261	bmp1b	bone morphogenetic protein 1b
ENSDARG00000013409	47.7431	-0.551748	0.366524	-1.50535	0.132233	0.301674	59	61	86	110	40.6741	43.1905	52.6125	70.3753	bmp2a	bone morphogenetic protein 2a
ENSDARG00000041430	154.237	-1.15746	0.208788	-5.54371	2.96132e-08	4.42561e-07	205	160	532	379	141.325	113.287	325.463	242.475	bmp2b	bone morphogenetic protein 2b
ENSDARG00000020009	1505.4	-0.38462	0.0829303	-4.63787	3.52016e-06	3.68151e-05	861	886	1362	1188	593.566	627.325	833.234	760.053	bmp2k	BMP2 inducible kinase
ENSDARG00000060526	56.3477	-0.343534	0.311198	-1.10391	0.269633	0.486012	81	103	130	131	55.8407	72.9283	79.5305	83.8106	bmp3	bone morphogenetic protein 3
ENSDARG00000019995	19.675	-0.492863	0.438516	-1.12393	0.261041	0.475606	42	36	76	47	28.9544	25.4895	46.4947	30.0694	bmp4	bone morphogenetic protein 4
ENSDARG00000101701	3.35022	-1.34268	1.07775	-1.24582	0.212831		10	2	23	11	6.89391	1.41608	14.0708	7.03753	bmp5	bone morphogenetic protein 5
ENSDARG00000015686	29.2695	-0.707056	0.53154	-1.3302	0.183452	0.376856	28	8	23	42	19.3029	5.66433	14.0708	26.8706	bmp6	bone morphogenetic protein 6
ENSDARG00000018260	7.7161	0.220521	0.886203	0.248838	0.803486	0.905406	10	8	1	16	6.89391	5.66433	0.611773	10.2364	bmp7a	bone morphogenetic protein 7a
ENSDARG00000063230	62.9685	-0.711402	0.295174	-2.41011	0.0159476	0.0597062	80	85	130	171	55.1513	60.1836	79.5305	109.402	bmp7b	bone morphogenetic protein 7b
ENSDARG00000035677	11.9004	0.0312156	0.627126	0.0497756	0.960301	0.981911	28	15	28	19	19.3029	10.6206	17.1296	12.1557	bmp8a	bone morphogenetic protein 8a
ENSDARG00000101980	46.0537	-1.63764	0.293984	-5.57051	2.53991e-08	3.83608e-07	65	85	266	256	44.8104	60.1836	162.732	163.782	bmper	BMP binding endothelial regulator
ENSDARG00000019728	415.98	-0.446905	0.148876	-3.00185	0.00268345	0.0136903	179	191	270	293	123.401	135.236	165.179	187.454	bmpr1aa	bone morphogenetic protein receptor, type IAa
ENSDARG00000105045	255.808	-0.170447	0.203558	-0.837338	0.402403	0.620669	163	116	204	147	112.371	82.1328	124.802	94.047	bmpr1ab	bone morphogenetic protein receptor, type IAb
ENSDARG00000104100	241.692	-0.431623	0.200696	-2.15064	0.031505	0.102642	151	84	172	181	104.098	59.4755	105.225	115.799	bmpr1ba	bone morphogenetic protein receptor, type IBa
ENSDARG00000011941	291.618	0.352265	0.174509	2.01861	0.0435277	0.132381	614	666	556	564	423.286	471.556	340.146	360.833	bmpr2a	bone morphogenetic protein receptor, type II a (serine/threonine kinase)
ENSDARG00000020057	1023.06	0.232244	0.109489	2.12115	0.0339088	0.10906	1310	1303	1353	1135	903.102	922.578	827.728	726.145	bmpr2b	bone morphogenetic protein receptor, type II b (serine/threonine kinase)
ENSDARG00000054154	350.9	0.0257451	0.140806	0.182841	0.854923	0.934473	369	299	365	367	254.385	211.704	223.297	234.798	bms1	BMS1 ribosome biogenesis factor
ENSDARG00000062181	139.844	-0.637589	0.196798	-3.23981	0.00119609	0.00680438	152	129	220	267	104.787	91.3374	134.59	170.82	bmt2	base methyltransferase of 25S rRNA 2 homolog
ENSDARG00000100757	31.6545	-0.389802	0.377754	-1.03189	0.302122	0.5212	97	91	139	136	66.8709	64.4318	85.0364	87.0094	bnc1	basonuclin 1
ENSDARG00000069989	109.474	0.683329	0.225197	3.03437	0.00241043	0.0124884	275	344	216	215	189.583	243.566	132.143	137.552	bnc2	basonuclin 2
ENSDARG00000078259	147.278	-0.202994	0.225033	-0.902065	0.367022	0.587411	92	106	105	149	63.424	75.0524	64.2361	95.3265	bnip1a	BCL2/adenovirus E1B interacting protein 1a
ENSDARG00000104280	213.555	0.287599	0.156593	1.8366	0.0662689	0.182871	313	323	325	258	215.779	228.698	198.826	165.062	bnip1b	BCL2/adenovirus E1B interacting protein 1b
ENSDARG00000013397	138.028	-0.247352	0.193864	-1.27591	0.201989	0.401309	176	144	250	175	121.333	101.958	152.943	111.961	bnip2	BCL2/adenovirus E1B interacting protein 2
ENSDARG00000099961	1152.88	0.266097	0.0806558	3.29916	0.000969733	0.00567387	2789	2740	2584	2550	1922.71	1940.03	1580.82	1631.43	bnip3	BCL2/adenovirus E1B interacting protein 3
ENSDARG00000025468	359.774	0.445971	0.143701	3.10346	0.00191275	0.0102661	501	522	367	470	345.385	369.598	224.521	300.694	bnip3la	BCL2/adenovirus E1B interacting protein 3-like a
ENSDARG00000028067	2241.57	-0.106683	0.0694728	-1.5356	0.124636	0.290422	2823	2881	3593	3272	1946.15	2039.87	2198.1	2093.34	bnip3lb	BCL2/adenovirus E1B interacting protein 3-like b
ENSDARG00000022832	248.531	-0.0693317	0.166177	-0.417215	0.676521	0.830237	247	201	249	275	170.28	142.316	152.331	175.938	bnip4	BCL2/adenovirus E1B interacting protein 4
ENSDARG00000060435	32.9638	-1.30118	0.446496	-2.91421	0.00356587	0.0173311	38	19	95	62	26.1969	13.4528	58.1184	39.6661	bnipl	BCL2/adenovirus E1B 19kD interacting protein, like
ENSDARG00000074335	1553.07	-0.0787214	0.119202	-0.660406	0.508993	0.711811	218	247	295	254	150.287	174.886	180.473	162.503	boc	BOC cell adhesion associated, oncogene regulated
ENSDARG00000089505	273.723	0.564104	0.185312	3.04407	0.00233399	0.0121513	449	542	367	382	309.537	383.759	224.521	244.394	bod1l1	biorientation of chromosomes in cell division 1-like 1
ENSDARG00000052129	107.587	-0.0991123	0.225159	-0.440188	0.659801	0.81942	211	196	282	206	145.461	138.776	172.52	131.794	boka	BCL2-related ovarian killer a
ENSDARG00000008807	14.4419	-3.70206	0.620318	-5.968	2.40182e-09	4.1872e-08	7	11	156	107	4.82574	7.78846	95.4365	68.456	bokb	BCL2-related ovarian killer b
ENSDARG00000039915	334.69	0.292054	0.131573	2.21971	0.0264385	0.0895086	442	368	365	373	304.711	260.559	223.297	238.636	bola1	bolA family member 1
ENSDARG00000098130	255.207	-0.0117405	0.156389	-0.0750724	0.940157	0.972018	271	268	279	327	186.825	189.755	170.685	209.207	bola3	bolA family member 3
ENSDARG00000063627	174.74	0.304391	0.191267	1.59145	0.111509	0.268054	273	218	268	177	188.204	154.353	163.955	113.24	bop1	block of proliferation 1
ENSDARG00000042688	25.6029	0.343433	0.440326	0.779951	0.43542	0.649859	46	20	33	25	31.712	14.1608	20.1885	15.9944	bora	bora, aurora kinase A activator
ENSDARG00000077830	84.0818	0.43203	0.225278	1.91776	0.0551411	0.15858	132	165	120	126	90.9996	116.827	73.4127	80.6117	borcs5	BLOC-1 related complex subunit 5
ENSDARG00000055070	135.993	0.0344025	0.187742	0.183243	0.854607	0.934332	258	247	290	261	177.863	174.886	177.414	166.981	borcs7	BLOC-1 related complex subunit 7
ENSDARG00000071339	39.755	-0.13467	0.357564	-0.376632	0.706447	0.849295	57	38	50	66	39.2953	26.9056	30.5886	42.2252	borcs8	BLOC-1 related complex subunit 8
ENSDARG00000070826	580.091	-0.171752	0.123681	-1.38867	0.164933	0.351143	958	900	1243	1096	660.437	637.238	760.433	701.194	bpgm	2,3-bisphosphoglycerate mutase
ENSDARG00000102877	308.95	-0.616048	0.153877	-4.0035	6.2412e-05	0.00050158	222	212	383	360	153.045	150.105	234.309	230.319	bphl	biphenyl hydrolase-like (serine hydrolase)
ENSDARG00000099980	41.8982	-1.69946	0.317277	-5.35638	8.49049e-08	1.19056e-06	37	46	144	157	25.5075	32.5699	88.0953	100.445	bpifcl	BPI fold containing family C, like
ENSDARG00000043684	232.679	-0.109908	0.16712	-0.65766	0.510757	0.713205	250	317	399	287	172.348	224.449	244.097	183.616	bpnt1	bisphosphate nucleotidase 1
ENSDARG00000077361	743.103	0.384175	0.115298	3.33201	0.000862213	0.00514054	1597	1636	1372	1394	1100.96	1158.36	839.352	891.847	bptf	bromodomain PHD finger transcription factor
ENSDARG00000017661	153.171	0.259119	0.193815	1.33694	0.181244	0.373758	311	298	253	314	214.401	210.996	154.778	200.889	braf	B-Raf proto-oncogene, serine/threonine kinase
ENSDARG00000008560	106.415	0.67619	0.232834	2.90418	0.00368218	0.0178436	248	187	136	167	170.969	132.404	83.2011	106.842	brap	BRCA1 associated protein
ENSDARG00000062585	151.824	0.245963	0.186888	1.3161	0.188141	0.382698	218	204	223	175	150.287	144.441	136.425	111.961	brat1	BRCA1-associated ATM activator 1
ENSDARG00000079015	69.2099	0.270459	0.299831	0.90204	0.367036	0.587411	108	123	136	79	74.4542	87.0891	83.2011	50.5423	brca2	breast cancer 2, early onset
ENSDARG00000013596	350.325	0.0181982	0.140423	0.129596	0.896886	0.953546	587	513	661	553	404.672	363.225	404.382	353.796	brd1a	bromodomain containing 1a
ENSDARG00000051798	719.791	0.010472	0.117706	0.0889669	0.929108	0.967574	1380	1200	1591	1273	951.36	849.65	973.33	814.434	brd1b	bromodomain containing 1b
ENSDARG00000022280	2122.58	0.157149	0.0601853	2.61108	0.00902577	0.0375081	4143	4213	4203	4166	2856.15	2982.98	2571.28	2665.3	brd2a	bromodomain containing 2a
ENSDARG00000046087	170.312	0.39437	0.258234	1.52718	0.126716	0.293731	355	412	397	258	244.734	291.713	242.874	165.062	brd2b	bromodomain containing 2b
ENSDARG00000006527	1016.99	0.163107	0.07222	2.25847	0.0239163	0.08287	1826	1763	1802	1777	1258.83	1248.28	1102.41	1136.88	brd3a	bromodomain containing 3a
ENSDARG00000100129	1442.62	0.353959	0.0730417	4.84598	1.25987e-06	1.42888e-05	2432	2316	2041	2105	1676.6	1639.82	1248.63	1346.73	brd3b	bromodomain containing 3b
ENSDARG00000078904	1069.02	0.175904	0.0955135	1.84166	0.0655245	0.181403	1996	1967	1834	2078	1376.02	1392.72	1121.99	1329.45	brd4	bromodomain containing 4
ENSDARG00000008380	372.978	-0.106408	0.139035	-0.765335	0.444072	0.656619	413	367	495	443	284.718	259.851	302.827	283.42	brd7	bromodomain containing 7
ENSDARG00000025071	459.975	0.0203238	0.131741	0.154272	0.877396	0.944248	641	629	723	676	441.9	445.358	442.312	432.488	brd8	bromodomain containing 8
ENSDARG00000017143	289.271	0.217115	0.13803	1.57296	0.115729	0.275629	510	502	513	460	351.589	355.437	313.839	294.297	brd9	bromodomain containing 9
ENSDARG00000102802	1175.26	0.554984	0.0763179	7.27201	3.54185e-13	9.36136e-12	2477	2560	1967	1864	1707.62	1812.59	1203.36	1192.54	brdt	bromodomain, testis-specific
ENSDARG00000038863	200.085	-0.423703	0.175271	-2.41742	0.015631	0.0587588	166	235	284	317	114.439	166.39	173.743	202.809	bre	brain and reproductive organ-expressed protein
ENSDARG00000017835	188.478	0.193449	0.181579	1.06537	0.286708	0.504277	221	264	236	238	152.355	186.923	144.378	152.267	brf1a	BRF1, RNA polymerase III transcription initiation factor a
ENSDARG00000005002	101.379	-0.380497	0.218989	-1.73751	0.082297	0.213942	124	124	165	195	85.4845	87.7972	100.942	124.756	brf1b	BRF1, RNA polymerase III transcription initiation factor b
ENSDARG00000002060	24.9238	0.0404787	0.443667	0.0912367	0.927304	0.966559	30	31	25	41	20.6817	21.9493	15.2943	26.2308	brf2	BRF2, RNA polymerase III transcription initiation factor
ENSDARG00000086332	676.401	-1.26225	0.0905414	-13.9412	3.5604e-44	4.4727e-42	879	878	2332	2373	605.975	621.661	1426.65	1518.19	bri3	brain protein I3
ENSDARG00000010108	244.01	0.0948914	0.146411	0.648115	0.51691	0.718226	454	484	574	410	312.983	342.692	351.158	262.308	bri3bp	bri3 binding protein
ENSDARG00000056247	15.0095	-2.13902	0.56663	-3.77499	0.000160016	0.00116711	27	27	119	146	18.6136	19.1171	72.801	93.4072	bricd5	BRICHOS domain containing 5
ENSDARG00000078302	628.006	0.442548	0.106602	4.15142	3.30421e-05	0.000283052	1446	1342	1151	1139	996.859	950.192	704.15	728.704	brinp1	bone morphogenetic protein/retinoic acid inducible neural-specific 1
ENSDARG00000014302	1612.85	0.278856	0.0794996	3.50763	0.000452113	0.00289806	2658	2573	2657	2166	1832.4	1821.79	1625.48	1385.75	brinp2	bone morphogenetic protein/retinoic acid inducible neural-specific 2
ENSDARG00000076351	539.989	-0.18181	0.126817	-1.43364	0.151675	0.331849	770	679	917	917	530.831	480.76	560.996	586.674	brinp3a.1	bone morphogenetic protein/retinoic acid inducible neural-specific 3a, tandem duplicate 1
ENSDARG00000061051	306.601	-0.395982	0.131187	-3.01845	0.00254073	0.0130684	486	455	715	668	335.044	322.159	437.417	427.37	brinp3a.2	bone morphogenetic protein/retinoic acid inducible neural-specific 3a, tandem duplicate 2
ENSDARG00000075352	63.4967	-0.25664	0.264534	-0.970157	0.331968	0.553638	117	127	173	153	80.6587	89.9213	105.837	97.8856	brinp3b	bone morphogenetic protein/retinoic acid inducible neural-specific 3b
ENSDARG00000074410	76.1864	0.105619	0.263164	0.401342	0.688169	0.837299	96	98	89	112	66.1815	69.3881	54.4478	71.6548	brip1	BRCA1 interacting protein C-terminal helicase 1
ENSDARG00000041974	1625.83	0.0862165	0.084973	1.01463	0.31028	0.529008	2697	2732	2962	2753	1859.29	1934.37	1812.07	1761.3	brk1	BRICK1, SCAR/WAVE actin-nucleating complex subunit
ENSDARG00000051955	390.686	0.392431	0.111239	3.52782	0.000418994	0.00270973	681	710	604	580	469.475	502.71	369.511	371.07	brms1	breast cancer metastasis suppressor 1
ENSDARG00000006235	413.171	0.404571	0.109987	3.67835	0.000234746	0.00163777	638	689	596	525	439.831	487.841	364.617	335.882	brms1la	breast cancer metastasis-suppressor 1-like a
ENSDARG00000018047	174.125	0.0216537	0.21303	0.101646	0.919037	0.96272	323	366	420	340	222.673	259.143	256.945	217.524	brms1lb	breast cancer metastasis-suppressor 1-like b
ENSDARG00000013659	136.03	0.22363	0.193652	1.1548	0.248171	0.459825	208	178	221	149	143.393	126.031	135.202	95.3265	brox	BRO1 domain and CAAX motif containing
ENSDARG00000070513	194.603	0.267274	0.148385	1.80122	0.0716687	0.193726	334	353	332	306	230.257	249.939	203.109	195.771	brpf3a	bromodomain and PHD finger containing, 3a
ENSDARG00000074238	130.908	-0.116627	0.223392	-0.522075	0.601618	0.780407	169	171	216	196	116.507	121.075	132.143	125.396	brpf3b	bromodomain and PHD finger containing, 3b
ENSDARG00000061421	112.505	0.0772379	0.191667	0.40298	0.686963	0.83661	237	292	294	267	163.386	206.748	179.861	170.82	brsk2a	BR serine/threonine kinase 2a
ENSDARG00000077791	147.744	0.398835	0.179097	2.22693	0.0259521	0.0882395	404	379	362	302	278.514	268.348	221.462	193.212	brsk2b	BR serine/threonine kinase 2b
ENSDARG00000074747	392.977	0.415119	0.139491	2.97596	0.00292074	0.0146628	832	990	755	772	573.573	700.961	461.888	493.907	brwd1	bromodomain and WD repeat domain containing 1
ENSDARG00000035540	239.266	0.599713	0.172602	3.47455	0.000511708	0.0032437	389	476	374	266	268.173	337.028	228.803	170.18	brwd3	bromodomain and WD repeat domain containing 3
ENSDARG00000037008	200.89	0.148392	0.15891	0.933813	0.3504	0.572083	280	288	307	266	193.029	203.916	187.814	170.18	bscl2	Berardinelli-Seip congenital lipodystrophy 2 (seipin)
ENSDARG00000025912	7.50558	0.0102087	0.90705	0.0112549	0.99102	0.995776	3	6	5	5	2.06817	4.24825	3.05886	3.19888	bscl2l	Bernardinelli-Seip congenital lipodystrophy 2, like
ENSDARG00000052623	2144.8	0.0341331	0.0650434	0.524774	0.59974	0.77941	3022	2838	3217	3172	2083.34	2009.42	1968.07	2029.37	bsdc1	BSD domain containing 1
ENSDARG00000019881	2291.86	-0.236959	0.0747554	-3.16978	0.00152553	0.00840102	3583	3256	4787	4219	2470.09	2305.38	2928.56	2699.21	bsg	basigin
ENSDARG00000099069	57.1715	0.0478321	0.277363	0.172453	0.863081	0.937762	121	139	167	115	83.4163	98.4178	102.166	73.5742	bsk146	brain specific kinase 146
ENSDARG00000079161	1236.69	0.823265	0.0802151	10.2632	1.03199e-24	6.29693e-23	4249	4168	2628	2682	2929.22	2951.12	1607.74	1715.88	bsnb	bassoon (presynaptic cytomatrix protein) b
ENSDARG00000086265	1.87975	-0.145534	1.80999	-0.080406	0.935914		3	1	5	0	2.06817	0.708042	3.05886	0	bsnd	barttin CLCNK-type chloride channel accessory beta subunit
ENSDARG00000104875	3.73187	0.0193098	1.11433	0.0173286	0.986174	0.993158	2	8	3	8	1.37878	5.66433	1.83532	5.1182	bspry	B-box and SPRY domain containing
ENSDARG00000068976	84.1296	-1.06937	0.204889	-5.21925	1.79644e-07	2.38291e-06	192	162	420	409	132.363	114.703	256.945	261.668	bsx	brain-specific homeobox
ENSDARG00000060089	306.676	0.242765	0.151705	1.60025	0.109543	0.264848	514	469	430	496	354.347	332.072	263.062	317.329	btaf1	BTAF1 RNA polymerase II, B-TFIID transcription factor-associated
ENSDARG00000062674	364.51	0.405587	0.134407	3.0176	0.00254781	0.0130985	666	689	615	529	459.134	487.841	376.24	338.441	btbd10a	BTB (POZ) domain containing 10a
ENSDARG00000020252	304.253	0.116042	0.147933	0.784419	0.432794	0.647569	470	406	483	420	324.014	287.465	295.486	268.706	btbd10b	BTB (POZ) domain containing 10b
ENSDARG00000063255	335.457	0.630192	0.120372	5.23538	1.64642e-07	2.20434e-06	1008	1034	725	748	694.906	732.115	443.535	478.552	btbd11a	BTB (POZ) domain containing 11a
ENSDARG00000063040	66.52	0.278734	0.254877	1.0936	0.274129	0.491174	134	117	119	112	92.3784	82.8409	72.801	71.6548	btbd11b	BTB (POZ) domain containing 11b
ENSDARG00000027710	8.43878	-0.387487	0.674754	-0.574264	0.565789	0.753962	16	10	22	16	11.0303	7.08042	13.459	10.2364	btbd16	BTB (POZ) domain containing 16
ENSDARG00000099321	1.70735	-1.15653	1.64297	-0.703923	0.481481		1	3	5	5	0.689391	2.12413	3.05886	3.19888	btbd17a	BTB (POZ) domain containing 17a
ENSDARG00000102472	243.654	-0.475148	0.164842	-2.88244	0.00394612	0.0189464	308	283	543	377	212.332	200.376	332.193	241.195	btbd17b	BTB (POZ) domain containing 17b
ENSDARG00000104653	14.3539	-0.0770294	0.56788	-0.135644	0.892103	0.951468	36	22	30	38	24.8181	15.5769	18.3532	24.3115	btbd2	BTB domain containing 2
ENSDARG00000042091	471.928	0.448291	0.128475	3.48932	0.00048425	0.00308338	1349	1143	983	1053	929.988	809.292	601.373	673.683	btbd2a	BTB (POZ) domain containing 2a
ENSDARG00000005544	56.2358	0.231354	0.285921	0.809156	0.418426	0.635208	87	76	79	76	59.977	53.8112	48.33	48.6229	btbd3a	BTB (POZ) domain containing 3a
ENSDARG00000087517	385.006	-0.566343	0.14397	-3.93377	8.36235e-05	0.000653444	252	330	497	467	173.727	233.654	304.051	298.775	btbd3b	BTB (POZ) domain containing 3b
ENSDARG00000076440	3177.95	0.587006	0.0573989	10.2268	1.50436e-24	8.94906e-23	4508	4508	3484	3223	3107.77	3191.85	2131.42	2062	btbd6a	BTB (POZ) domain containing 6a
ENSDARG00000032369	2170.56	0.0983444	0.0595485	1.6515	0.0986366	0.245254	3490	3296	3706	3376	2405.97	2333.71	2267.23	2159.88	btbd6b	BTB (POZ) domain containing 6b
ENSDARG00000003069	45.109	0.534531	0.315085	1.69646	0.0897984	0.228383	112	87	70	83	77.2118	61.5996	42.8241	53.1014	btbd7	BTB (POZ) domain containing 7
ENSDARG00000068983	586.641	0.122249	0.1302	0.938933	0.347765	0.569458	501	684	589	628	345.385	484.301	360.334	401.779	btbd9	BTB (POZ) domain containing 9
ENSDARG00000098112	30.4264	-1.70931	0.423583	-4.03536	5.45192e-05	0.000443378	13	22	64	64	8.96208	15.5769	39.1535	40.9456	btc	betacellulin, epidermal growth factor family member
ENSDARG00000099596	152.193	0.422612	0.231656	1.8243	0.068106	0.186734	138	119	108	106	95.136	84.257	66.0715	67.8162	btd	biotinidase
ENSDARG00000035400	5437.81	-0.105608	0.0728367	-1.44992	0.14708	0.325399	7460	7479	8862	9081	5142.86	5295.44	5421.53	5809.8	btf3	basic transcription factor 3
ENSDARG00000089681	769.554	0.158491	0.0953765	1.66174	0.0965644	0.241084	1084	1041	1105	1022	747.3	737.072	676.009	653.85	btf3l4	basic transcription factor 3-like 4
ENSDARG00000027249	22980.4	-0.0605009	0.0464519	-1.30244	0.192765	0.38888	44128	41628	50759	49093	30421.4	29474.4	31053	31408.5	btg1	B-cell translocation gene 1, anti-proliferative
ENSDARG00000020298	27292.6	-0.329667	0.0448565	-7.34937	1.99146e-13	5.41088e-12	10345	9875	14317	14054	7131.75	6991.91	8758.75	8991.4	btg2	B-cell translocation gene 2
ENSDARG00000069065	1536.39	0.191921	0.0715976	2.68055	0.0073501	0.0316214	1912	1822	1846	1804	1318.12	1290.05	1129.33	1154.15	btg3	B-cell translocation gene 3
ENSDARG00000035171	0.519898	-0.856943	3.35806	-0.25519	0.798576		0	1	0	2	0	0.708042	0	1.27955	btg4	B-cell translocation gene 4
ENSDARG00000004433	109.828	-1.00866	0.23107	-4.36518	1.2702e-05	0.000119658	144	146	311	340	99.2723	103.374	190.261	217.524	btk	Bruton agammaglobulinemia tyrosine kinase
ENSDARG00000051965	1.1868	-0.85244	2.16914	-0.392984	0.694331		2	0	2	2	1.37878	0	1.22355	1.27955	btr01	bloodthirsty-related gene family, member 1
ENSDARG00000052215	4.64036	-1.18109	1.09299	-1.0806	0.279874	0.496456	8	3	21	7	5.51513	2.12413	12.8472	4.47843	btr02	bloodthirsty-related gene family, member 2
ENSDARG00000060962	38.6644	-0.550111	0.425418	-1.29311	0.195974	0.393385	14	22	32	27	9.65147	15.5769	19.5767	17.2739	btr04	bloodthirsty-related gene family, member 4
ENSDARG00000074813	0.173864	1.11398	6.68722	0.166583	0.867698		2	0	0	1	1.37878	0	0	0.639775	btr05	bloodthirsty-related gene family, member 5
ENSDARG00000054184	0.0958422	1.61801	6.76482	0.239181	0.810966		0	1	0	0	0	0.708042	0	0	btr06	bloodthirsty-related gene family, member 6
ENSDARG00000105558	31.1842	-0.809983	0.372824	-2.17256	0.0298131	0.0984304	115	105	229	202	79.28	74.3444	140.096	129.235	btr07	bloodthirsty-related gene family, member 7
ENSDARG00000054805	17.9658	-0.630194	0.668625	-0.942521	0.345926	0.567665	13	41	25	68	8.96208	29.0297	15.2943	43.5047	btr09	bloodthirsty-related gene family, member 9
ENSDARG00000051809	2.72103	-0.129655	1.22418	-0.105912	0.915652		5	4	6	5	3.44695	2.83217	3.67064	3.19888	btr12	bloodthirsty-related gene family, member 12
ENSDARG00000028850	1.88137	-0.431756	1.60216	-0.269484	0.787558		3	1	3	3	2.06817	0.708042	1.83532	1.91933	btr16	bloodthirsty-related gene family, member 16
ENSDARG00000095113	1.7994	0.14988	2.50671	0.0597912	0.952322		1	0	0	1	0.689391	0	0	0.639775	btr16	bloodthirsty-related gene family, member 16
ENSDARG00000103618	14.5685	0.198809	0.587734	0.338264	0.735164	0.867293	15	22	16	20	10.3409	15.5769	9.78836	12.7955	btr18	bloodthirsty-related gene family, member 18
ENSDARG00000102992	4.52141	-0.258593	1.0746	-0.240641	0.809833	0.909391	4	2	4	4	2.75756	1.41608	2.44709	2.5591	btr20	bloodthirsty-related gene family, member 20
ENSDARG00000100450	2.35587	0.48353	1.47872	0.326993	0.743673		2	3	2	2	1.37878	2.12413	1.22355	1.27955	btr21	bloodthirsty-related gene family, member 21
ENSDARG00000100539	0.929006	0.581558	2.03064	0.286392	0.774578		2	2	2	1	1.37878	1.41608	1.22355	0.639775	btr22	bloodthirsty-related gene family, member 22
ENSDARG00000099509	10.8169	0.34886	0.566267	0.61607	0.537848	0.734766	24	35	31	21	16.5454	24.7815	18.965	13.4353	btr23	bloodthirsty-related gene family, member 23
ENSDARG00000102143	7.15868	1.27423	0.75632	1.68477	0.0920325	0.232374	11	15	5	7	7.5833	10.6206	3.05886	4.47843	btr24	bloodthirsty-related gene family, member 24
ENSDARG00000102018	3.94996	-0.680928	1.05984	-0.642481	0.520561	0.721089	6	3	6	10	4.13635	2.12413	3.67064	6.39775	btr25	bloodthirsty-related gene family, member 25
ENSDARG00000105241	13.7672	0.514925	0.615318	0.836844	0.40268	0.620913	11	12	10	8	7.5833	8.4965	6.11773	5.1182	btr26	bloodthirsty-related gene family, member 26
ENSDARG00000099138	14.6417	-0.218769	0.572368	-0.382218	0.702299	0.847027	22	15	24	24	15.1666	10.6206	14.6825	15.3546	btr29	bloodthirsty-related gene family, member 29
ENSDARG00000102591	0.330889	0.15019	4.79212	0.0313411	0.974997		0	1	0	1	0	0.708042	0	0.639775	btr30	bloodthirsty-related gene family, member 30
ENSDARG00000104912	0.316805	-2.28365	4.38961	-0.52024	0.602896		0	0	1	1	0	0	0.611773	0.639775	btr30	bloodthirsty-related gene family, member 30
ENSDARG00000096304	58.2147	-0.566049	0.292022	-1.93838	0.0525775	0.152976	87	78	147	126	59.977	55.2273	89.9306	80.6117	btr31	bloodthirsty-related gene family, member 31
ENSDARG00000053940	8.60611	-0.58355	0.775122	-0.752849	0.451541	0.662922	12	6	14	16	8.27269	4.24825	8.56482	10.2364	btr32	bloodthirsty-related gene family, member 32
ENSDARG00000008164	2.51008	-0.432738	1.15739	-0.373891	0.708485		5	3	5	7	3.44695	2.12413	3.05886	4.47843	btr33	bloodthirsty-related gene family, member 33
ENSDARG00000077029	37.4741	0.204368	0.425212	0.480626	0.630783	0.800283	24	34	17	39	16.5454	24.0734	10.4001	24.9512	bub1	BUB1 mitotic checkpoint serine/threonine kinase
ENSDARG00000078825	34.7425	-0.356276	0.36546	-0.974871	0.329624	0.550947	59	30	68	59	40.6741	21.2413	41.6005	37.7467	bub1ba	BUB1 mitotic checkpoint serine/threonine kinase Ba
ENSDARG00000074927	12.1478	-0.442007	0.738885	-0.598208	0.549701	0.742094	6	11	18	8	4.13635	7.78846	11.0119	5.1182	bub1bb	BUB1 mitotic checkpoint serine/threonine kinase Bb
ENSDARG00000075883	264.803	-0.102146	0.154017	-0.663209	0.507196	0.710182	376	350	411	458	259.211	247.815	251.439	293.017	bub3	BUB3 mitotic checkpoint protein
ENSDARG00000096095	9.51931	0.104814	0.876104	0.119636	0.904772	0.957166	7	11	18	1	4.82574	7.78846	11.0119	0.639775	buc	bucky ball
ENSDARG00000096628	1.54028	-0.600062	1.60591	-0.373659	0.708658		7	2	4	11	4.82574	1.41608	2.44709	7.03753	buc2l	bucky ball 2-like
ENSDARG00000017084	979.286	0.0360224	0.0954575	0.377366	0.705902	0.848839	1312	1376	1458	1470	904.481	974.266	891.965	940.47	bud31	BUD31 homolog (S. cerevisiae)
ENSDARG00000058548	21.6666	0.197758	0.488867	0.404523	0.685828	0.835727	80	51	58	69	55.1513	36.1101	35.4828	44.1445	bves	blood vessel epicardial substance
ENSDARG00000098935	495.433	0.175744	0.126407	1.3903	0.164437	0.350465	632	516	546	587	435.695	365.35	334.028	375.548	bxdc2	brix domain containing 2
ENSDARG00000001057	211.091	0.305329	0.21656	1.4099	0.158568	0.341645	332	284	193	360	228.878	201.084	118.072	230.319	bysl	bystin-like
ENSDARG00000010481	4659.64	0.204666	0.0598541	3.41941	0.000627568	0.00388514	6359	5994	5837	6122	4383.84	4244	3570.92	3916.7	bzw1a	basic leucine zipper and W2 domains 1a
ENSDARG00000099148	4451.52	-1.52993	0.0610419	-25.0637	1.23901e-138	2.03541e-135	2967	3078	9990	9515	2045.42	2179.35	6111.61	6087.46	bzw1b	basic leucine zipper and W2 domains 1b
ENSDARG00000035918	125.796	-0.964783	0.232246	-4.15414	3.26508e-05	0.000279924	173	122	379	265	119.265	86.3811	231.862	169.54	bzw2	basic leucine zipper and W2 domains 2
ENSDARG00000035332	609.455	-0.3049	0.10609	-2.87398	0.00405335	0.0193648	603	590	868	779	415.703	417.745	531.019	498.385	c10h21orf59	c10h21orf59 homolog (H. sapiens)
ENSDARG00000053520	115.175	-0.228176	0.268595	-0.849516	0.395594	0.614177	36	42	47	55	24.8181	29.7378	28.7533	35.1876	c12h7orf62	chromosome 12 open reading frame, human C7orf62
ENSDARG00000057166	68.9697	-0.88656	0.275172	-3.22184	0.00127369	0.00720361	47	49	92	106	32.4014	34.694	56.2831	67.8162	c13h10orf11	c13h10orf11 homolog (H. sapiens)
ENSDARG00000100901	4.03439	-1.02718	0.946732	-1.08498	0.277932	0.494832	12	6	25	16	8.27269	4.24825	15.2943	10.2364	c13h7orf72	chromosome 13 open reading frame, human C7orf72
ENSDARG00000086059	1.82778	-0.832772	1.60992	-0.517277	0.604963		1	4	5	5	0.689391	2.83217	3.05886	3.19888	c14h4orf45	chromosome 14 open reading frame, human C4orf45
ENSDARG00000005179	293.713	-0.17699	0.147147	-1.20281	0.229049	0.43706	303	289	430	319	208.885	204.624	263.062	204.088	c17h14orf159	c17h14orf159 homolog (H. sapiens)
ENSDARG00000040582	63.2311	0.0330484	0.270121	0.122346	0.902625	0.955795	105	74	96	99	72.3861	52.3951	58.7302	63.3378	c18h3orf33	c18h3orf33 homolog (H. sapiens)
ENSDARG00000012113	84.202	0.00925503	0.275544	0.0335881	0.973206	0.98688	77	87	89	93	53.0831	61.5996	54.4478	59.4991	c19h1orf109	c19h1orf109 homolog (H. sapiens)
ENSDARG00000021112	192.537	0.00725387	0.155266	0.046719	0.962737	0.982826	233	221	241	263	160.628	156.477	147.437	168.261	c1d	C1D nuclear receptor corepressor
ENSDARG00000055585	248.777	-0.639838	0.139016	-4.60263	4.17198e-06	4.29797e-05	254	264	469	433	175.105	186.923	286.921	277.023	c1galt1a	core 1 synthase, glycoprotein-N-acetylgalactosamine 3-beta-galactosyltransferase, 1a
ENSDARG00000055561	321.558	-1.08074	0.165774	-6.51937	7.06033e-11	1.48114e-09	297	198	615	553	204.749	140.192	376.24	353.796	c1galt1b	core 1 synthase, glycoprotein-N-acetylgalactosamine 3-beta-galactosyltransferase, 1b
ENSDARG00000036335	353.602	-0.15109	0.140379	-1.07629	0.281795	0.498899	276	267	397	278	190.272	189.047	242.874	177.858	c1galt1c1	C1GALT1-specific chaperone 1
ENSDARG00000044613	278.243	-2.16483	0.134564	-16.0878	3.10928e-58	6.03653e-56	214	208	1066	1047	147.53	147.273	652.15	669.845	c1qa	complement component 1, q subcomponent, A chain
ENSDARG00000044612	693.984	-2.02963	0.103676	-19.5767	2.44156e-85	9.48036e-83	510	555	2326	2527	351.589	392.963	1422.98	1616.71	c1qb	complement component 1, q subcomponent, B chain
ENSDARG00000039887	700.846	-0.212959	0.121315	-1.75543	0.0791862	0.208051	597	586	683	845	411.566	414.912	417.841	540.61	c1qbp	complement component 1, q subcomponent binding protein
ENSDARG00000095627	775.681	-2.22236	0.0968574	-22.9447	1.66583e-116	1.54676e-113	529	516	2714	2730	364.688	365.35	1660.35	1746.59	c1qc	complement component 1, q subcomponent, C chain
ENSDARG00000028521	3.7254	-0.0588825	1.05631	-0.0557436	0.955546	0.979312	12	7	10	12	8.27269	4.95629	6.11773	7.6773	c1ql1	complement component 1, q subcomponent-like 1
ENSDARG00000015592	3.36602	-1.32535	1.03036	-1.2863	0.19834		11	7	19	31	7.5833	4.95629	11.6237	19.833	c1ql2	complement component 1, q subcomponent-like 2
ENSDARG00000010350	50.5627	0.304561	0.323531	0.941365	0.346518	0.5682	149	90	94	121	102.719	63.7238	57.5066	77.4128	c1ql3a	complement component 1, q subcomponent-like 3a
ENSDARG00000036483	68.9699	0.268819	0.269807	0.996339	0.319085	0.539369	106	101	102	90	73.0754	71.5122	62.4008	57.5798	c1ql3b	complement component 1, q subcomponent-like 3b
ENSDARG00000011549	99.7995	-0.791595	0.244894	-3.2324	0.00122757	0.00696492	134	103	188	268	92.3784	72.9283	115.013	171.46	c1ql4a	complement component 1, q subcomponent-like 4
ENSDARG00000055317	22.3576	0.716866	0.412999	1.73576	0.082607	0.214617	63	46	39	35	43.4316	32.5699	23.8591	22.3921	c1ql4b	complement component 1, q subcomponent-like 4b
ENSDARG00000053802	1.25471	0.740483	1.99991	0.370259	0.71119		6	0	3	1	4.13635	0	1.83532	0.639775	c1ql4l	complement component 1, q subcomponent-like 4 like
ENSDARG00000088878	52.0108	0.646685	0.338069	1.91288	0.0557636	0.159958	45	60	38	37	31.0226	42.4825	23.2474	23.6717	c1qtnf1	C1q and tumor necrosis factor related protein 1
ENSDARG00000059944	4.38295	0.169972	1.24126	0.136935	0.891082	0.950879	2	3	4	1	1.37878	2.12413	2.44709	0.639775	c1qtnf2	C1q and tumor necrosis factor related protein 2
ENSDARG00000024299	5252.92	0.580969	0.0526271	11.0394	2.46783e-28	1.8049e-26	13352	13143	10542	9260	9204.75	9305.79	6449.31	5924.32	c1qtnf4	C1q and tumor necrosis factor related protein 4
ENSDARG00000056134	48.8525	-0.563185	0.301157	-1.87007	0.0614744	0.17272	72	68	89	141	49.6361	48.1468	54.4478	90.2083	c1qtnf5	C1q and tumor necrosis factor related protein 5
ENSDARG00000055175	2.20571	1.70914	2.11931	0.806457	0.419979		6	0	0	2	4.13635	0	0	1.27955	c1qtnf6a	C1q and tumor necrosis factor related protein 6a
ENSDARG00000006544	6.37664	-0.32573	0.841392	-0.387132	0.698659	0.844448	7	13	12	16	4.82574	9.20454	7.34127	10.2364	c1qtnf6b	C1q and tumor necrosis factor related protein 6b
ENSDARG00000074949	0.608904	0.153003	3.43394	0.0445561	0.964461		0	1	0	1	0	0.708042	0	0.639775	c1qtnf7	C1q and tumor necrosis factor related protein 7
ENSDARG00000058318	0.379632	2.15932	4.06251	0.531523	0.595056		3	1	1	0	2.06817	0.708042	0.611773	0	c1qtnf9	C1q and tumor necrosis factor related protein 9
ENSDARG00000100248	0.0429956	0.159294	6.76668	0.023541	0.981219		0	0	0	0	0	0	0	0	c1r	complement component 1, r subcomponent
ENSDARG00000100599	105.093	-0.557169	0.2553	-2.1824	0.0290797	0.0964775	84	90	144	142	57.9088	63.7238	88.0953	90.8481	c1s	complement component 1, s subcomponent
ENSDARG00000074790	501.678	-0.233295	0.108769	-2.14486	0.0319639	0.103812	575	565	800	698	396.4	400.044	489.418	446.563	c23h20orf24	c23h20orf24 homolog (H. sapiens)
ENSDARG00000045254	87.7098	0.0233895	0.229773	0.101794	0.91892	0.96272	123	137	149	137	84.7951	97.0017	91.1541	87.6492	c24h7orf50	chromosome 24 open reading frame, human C7orf50
ENSDARG00000100152	58.1742	0.198396	0.254711	0.778905	0.436036	0.650414	144	135	123	148	99.2723	95.5856	75.248	94.6868	c25h12orf75	chromosome 25 open reading frame, human C12orf75
ENSDARG00000105000	120.435	-0.431398	0.217015	-1.98788	0.0468254	0.13988	116	150	200	201	79.9694	106.206	122.355	128.595	c2cd2	C2 calcium dependent domain containing 2
ENSDARG00000061066	430.963	0.294812	0.105511	2.79414	0.00520382	0.0238739	1108	1130	1064	975	763.845	800.087	650.926	623.781	c2cd2l	c2cd2-like
ENSDARG00000074137	59.2389	0.35863	0.358601	1.00008	0.317272	0.537283	110	88	80	92	75.833	62.3077	48.9418	58.8593	c2cd3	C2 calcium-dependent domain containing 3
ENSDARG00000061416	130.559	0.385069	0.240482	1.60124	0.109324	0.26451	203	225	150	215	139.946	159.309	91.7659	137.552	c2cd4a	C2 calcium dependent domain containing 4A
ENSDARG00000094590	484.705	0.250829	0.100912	2.48562	0.0129327	0.0503405	1090	1029	1053	937	751.436	728.575	644.197	599.47	c2cd5	C2 calcium-dependent domain containing 5
ENSDARG00000042671	205.003	-0.301582	0.205593	-1.46689	0.142406	0.317998	145	202	230	248	99.9617	143.024	140.708	158.664	c2h1orf27	c2h1orf27 homolog (H. sapiens)
ENSDARG00000012694	10.9686	0.98877	0.808844	1.22245	0.221538	0.427113	12	11	9	4	8.27269	7.78846	5.50595	2.5591	c3a.1	complement component c3a, duplicate 1
ENSDARG00000087359	0.430526	-0.419058	3.79632	-0.110386	0.912104		0	2	1	2	0	1.41608	0.611773	1.27955	c3a.2	complement component c3a, duplicate 2
ENSDARG00000052207	1.02131	-1.16786	2.10934	-0.553661	0.579811		1	1	2	3	0.689391	0.708042	1.22355	1.91933	c3a.3	complement component c3a, duplicate 3
ENSDARG00000093198	40.8341	-3.35203	0.374786	-8.94386	3.75803e-19	1.61158e-17	16	20	214	197	11.0303	14.1608	130.919	126.036	c3a.4	complement component c3a, duplicate 4
ENSDARG00000043719	2.45181	-0.851606	1.33317	-0.638783	0.522964		2	8	3	17	1.37878	5.66433	1.83532	10.8762	c3a.6	complement component c3a, duplicate 6
ENSDARG00000031749	5.22253	-1.41216	1.88774	-0.748068	0.454419	0.665627	0	1	3	0	0	0.708042	1.83532	0	c3ar1	C3a anaphylatoxin chemotactic receptor
ENSDARG00000093068	43.4113	-0.258389	0.398249	-0.648813	0.51646	0.717833	20	27	38	25	13.7878	19.1171	23.2474	15.9944	c3b.1	complement component c3b, tandem duplicate 1
ENSDARG00000001818	15.1616	-0.188402	0.555101	-0.3394	0.734308	0.866923	20	17	22	25	13.7878	12.0367	13.459	15.9944	c3b.2	complement component c3b, tandem duplicate 2
ENSDARG00000015065	640.815	-0.246817	0.200903	-1.22854	0.219245	0.424612	85	71	122	85	58.5982	50.271	74.6363	54.3809	c4	complement component 4
ENSDARG00000021004	1.84537	1.17117	1.55928	0.7511	0.452593		4	2	3	0	2.75756	1.41608	1.83532	0	c5	complement component 5
ENSDARG00000040319	84.8743	-2.054	0.256677	-8.00227	1.22143e-15	4.06939e-14	76	64	359	291	52.3937	45.3147	219.626	186.175	c5ar1	C5a anaphylatoxin chemotactic receptor
ENSDARG00000101743	5.70137	-1.07855	0.818232	-1.31815	0.187454	0.381882	6	8	15	18	4.13635	5.66433	9.17659	11.516	c5h11orf1	chromosome 5 open reading frame, human C11orf1
ENSDARG00000103142	26.8129	-0.00199078	0.452398	-0.00440049	0.996489	0.998172	26	16	28	19	17.9242	11.3287	17.1296	12.1557	c5h9orf69	chromosome 5 open reading frame, human C9orf69
ENSDARG00000057113	64.1542	-0.000376021	0.28302	-0.0013286	0.99894	0.999736	72	76	71	94	49.6361	53.8112	43.4359	60.1389	c6	complement component 6
ENSDARG00000069216	3.08808	-0.857997	1.17602	-0.729575	0.46565		12	2	11	17	8.27269	1.41608	6.7295	10.8762	c6ast1	six-cysteine containing astacin protease 1
ENSDARG00000024503	0.683328	1.15113	2.91808	0.394481	0.693226		0	4	0	2	0	2.83217	0	1.27955	c6ast3	six-cysteine containing astacin protease 3
ENSDARG00000052578	0.914308	-2.33747	2.3504	-0.994501	0.319979		2	0	1	10	1.37878	0	0.611773	6.39775	c6ast4	six-cysteine containing astacin protease 4
ENSDARG00000042172	112.654	0.00781532	0.206737	0.0378031	0.969845	0.985718	201	204	259	192	138.568	144.441	158.449	122.837	c7a	complement component 7a
ENSDARG00000057121	1408.22	-0.794348	0.0752519	-10.5559	4.77269e-26	3.11699e-24	1673	1540	3311	2916	1153.35	1090.38	2025.58	1865.58	c7b	complement component 7b
ENSDARG00000039516	2.74107	-0.40184	1.19785	-0.335467	0.737273		8	5	6	13	5.51513	3.54021	3.67064	8.31708	c8a	complement component 8, alpha polypeptide
ENSDARG00000039517	8.75226	1.12646	0.789984	1.42592	0.15389	0.334749	21	34	8	20	14.4772	24.0734	4.89418	12.7955	c8b	complement component 8, beta polypeptide
ENSDARG00000032098	23.4491	2.15769	1.6488	1.30865	0.190654	0.386081	3	1	0	1	2.06817	0.708042	0	0.639775	c8g	complement component 8, gamma polypeptide
ENSDARG00000016319	0.367144	0.159296	4.25116	0.0374713	0.970109		0	0	0	0	0	0	0	0	c9	complement component 9
ENSDARG00000052644	457.748	0.129043	0.104328	1.23689	0.216129	0.420369	1129	1145	1185	1138	778.322	810.708	724.951	728.064	ca10a	carbonic anhydrase Xa
ENSDARG00000009568	178.379	-0.021057	0.182286	-0.115516	0.908036	0.958577	196	211	252	210	135.121	149.397	154.167	134.353	ca10b	carbonic anhydrase Xb
ENSDARG00000045644	33.1352	0.35266	0.463112	0.7615	0.446358	0.658635	22	17	13	21	15.1666	12.0367	7.95305	13.4353	ca12	carbonic anhydrase XII
ENSDARG00000061697	9.73354	-2.00664	1.25996	-1.59262	0.111245	0.267721	0	2	5	4	0	1.41608	3.05886	2.5591	ca14	carbonic anhydrase XIV
ENSDARG00000015654	0.496218	-0.854016	3.68258	-0.231907	0.81661		0	2	0	4	0	1.41608	0	2.5591	ca15a	carbonic anhydrase XVa
ENSDARG00000040510	0.506566	0.441406	6.51162	0.0677874	0.945955		5	1	5	0	3.44695	0.708042	3.05886	0	ca15b	carbonic anhydrase XVb
ENSDARG00000002259	0.413556	3.91311	3.93013	0.99567	0.31941		4	1	0	0	2.75756	0.708042	0	0	ca15c	carbonic anhydrase XV c
ENSDARG00000060123	428.026	-0.625713	0.12347	-5.06774	4.02573e-07	4.99266e-06	698	718	1221	1219	481.195	508.374	746.974	779.886	ca16b	carbonic anhydrase XVI b
ENSDARG00000051814	1604.87	-0.246977	0.141892	-1.7406	0.0817535	0.21284	160	125	217	161	110.303	88.5052	132.755	103.004	ca16c	carbonic anhydrase XVI c
ENSDARG00000014488	419.325	-0.44336	0.109455	-4.05063	5.10807e-05	0.000417162	730	764	1218	1054	503.255	540.944	745.139	674.323	ca2	carbonic anhydrase II
ENSDARG00000043589	1174.54	-0.0061973	0.127989	-0.0484208	0.961381	0.982182	585	502	694	527	403.294	355.437	424.57	337.162	ca4a	carbonic anhydrase IV a
ENSDARG00000042293	0.726534	0.175437	3.2845	0.0534136	0.957402		0	1	1	0	0	0.708042	0.611773	0	ca4b	carbonic anhydrase IV b
ENSDARG00000044512	0.437863	1.17759	3.5193	0.334609	0.73792		3	1	2	0	2.06817	0.708042	1.22355	0	ca4c	carbonic anhydrase IV c
ENSDARG00000101778	271.803	0.0307087	0.186281	0.164852	0.869061	0.940539	267	227	312	229	184.067	160.725	190.873	146.509	ca5a	carbonic anhydrase Va
ENSDARG00000056499	293.517	-0.897563	0.205403	-4.36976	1.24384e-05	0.000117537	84	57	146	147	57.9088	40.3584	89.3188	94.047	ca6	carbonic anhydrase VI
ENSDARG00000045139	5.93856	0.826889	1.073	0.770633	0.440925	0.654552	4	7	6	1	2.75756	4.95629	3.67064	0.639775	ca7	carbonic anhydrase VII
ENSDARG00000039098	1131.84	-0.559415	0.111439	-5.01994	5.16881e-07	6.30398e-06	248	262	486	355	170.969	185.507	297.322	227.12	ca8	carbonic anhydrase VIII
ENSDARG00000102300	176.927	-1.40601	0.212772	-6.60806	3.89379e-11	8.4422e-10	96	69	283	206	66.1815	48.8549	173.132	131.794	ca9	carbonic anhydrase IX
ENSDARG00000043451	102.272	0.329337	0.217843	1.51181	0.130582	0.299379	237	241	188	236	163.386	170.638	115.013	150.987	cab39	calcium binding protein 39
ENSDARG00000036658	2592.07	0.0779597	0.0580829	1.34221	0.179527	0.371257	3846	3695	4158	3824	2651.4	2616.21	2543.75	2446.5	cab39l	calcium binding protein 39-like
ENSDARG00000021374	647.403	-0.210327	0.0902174	-2.33133	0.0197358	0.0708486	1290	1213	1739	1498	889.314	858.855	1063.87	958.383	cab39l1	calcium binding protein 39, like 1
ENSDARG00000079326	206.172	0.351627	0.201249	1.74722	0.0805986	0.21081	415	391	377	329	286.097	276.844	230.638	210.486	cabin1	calcineurin binding protein 1
ENSDARG00000099395	63.0724	0.129708	0.253326	0.51202	0.608637	0.785001	132	152	143	147	90.9996	107.622	87.4835	94.047	cables1	Cdk5 and Abl enzyme substrate 1
ENSDARG00000076964	266.435	-0.242226	0.136491	-1.77466	0.0759536	0.202278	419	463	597	569	288.855	327.823	365.228	364.032	cables2a	Cdk5 and Abl enzyme substrate 2a
ENSDARG00000017154	211.108	0.360874	0.183571	1.96585	0.0493162	0.14565	469	564	498	403	323.324	399.336	304.663	257.829	cables2b	Cdk5 and Abl enzyme substrate 2b
ENSDARG00000019990	22.6167	0.545592	0.398328	1.3697	0.170779	0.359609	111	100	72	89	76.5224	70.8042	44.0476	56.94	cabp1a	calcium binding protein 1a
ENSDARG00000033411	121.618	0.569725	0.194958	2.9223	0.0034746	0.0169415	398	338	299	255	274.378	239.318	182.92	163.143	cabp1b	calcium binding protein 1b
ENSDARG00000052016	8.35076	-1.32098	0.891072	-1.48247	0.138216	0.311305	8	4	6	27	5.51513	2.83217	3.67064	17.2739	cabp2a	calcium binding protein 2a
ENSDARG00000052277	32.4061	-2.45031	0.383335	-6.39208	1.63647e-10	3.27539e-09	28	33	174	198	19.3029	23.3654	106.448	126.676	cabp2b	calcium binding protein 2b
ENSDARG00000008866	0.0894273	1.59598	6.76598	0.235883	0.813524		1	0	0	0	0.689391	0	0	0	cabp4	calcium binding protein 4
ENSDARG00000002576	146.555	0.637185	0.205924	3.09426	0.00197301	0.0105524	458	510	363	333	315.741	361.101	222.073	213.045	cabp5a	calcium binding protein 5a
ENSDARG00000028485	27.296	-2.2835	0.408854	-5.58512	2.33536e-08	3.5447e-07	33	33	185	174	22.7499	23.3654	113.178	111.321	cabp5b	calcium binding protein 5b
ENSDARG00000060846	41.8019	0.117379	0.34904	0.336292	0.736651	0.867996	104	111	127	95	71.6967	78.5926	77.6951	60.7787	cabp7b	calcium binding protein 7b
ENSDARG00000067794	63.0662	0.106634	0.297496	0.358437	0.720016	0.857604	79	92	105	73	54.4619	65.1398	64.2361	46.7036	cabz01076234.2	cabz01076234.2
ENSDARG00000086616	74.7875	0.189735	0.261945	0.724331	0.468863	0.677888	197	156	196	150	135.81	110.455	119.907	95.9663	cabz01093075.1	cabz01093075.1
ENSDARG00000061590	1095.99	-0.129427	0.112568	-1.14976	0.250241	0.462176	1100	1042	1322	1294	758.33	737.78	808.764	827.869	cachd1	cache domain containing 1
ENSDARG00000037905	634.415	0.637589	0.100824	6.32376	2.55271e-10	5.01524e-09	2319	2084	1574	1584	1598.7	1475.56	962.93	1013.4	cacna1aa	calcium channel, voltage-dependent, P/Q type, alpha 1A subunit, a
ENSDARG00000006923	331.707	1.29884	0.169287	7.6724	1.68807e-14	5.07753e-13	1977	1662	732	914	1362.93	1176.77	447.818	584.755	cacna1ab	calcium channel, voltage-dependent, P/Q type, alpha 1A subunit, b
ENSDARG00000021735	217.708	0.0785746	0.13914	0.564715	0.572267	0.75909	744	813	791	855	512.907	575.638	483.912	547.008	cacna1ba	calcium channel, voltage-dependent, N type, alpha 1B subunit, a
ENSDARG00000079295	55.0162	0.336333	0.277216	1.21325	0.225034	0.431707	220	221	194	196	151.666	156.477	118.684	125.396	cacna1bb	calcium channel, voltage-dependent, N type, alpha 1B subunit, b
ENSDARG00000008398	118.593	0.426006	0.228817	1.86177	0.0626351	0.17511	391	386	304	341	269.552	273.304	185.979	218.163	cacna1c	calcium channel, voltage-dependent, L type, alpha 1C subunit
ENSDARG00000102773	59.6772	0.430753	0.331986	1.29751	0.194457	0.391112	200	210	151	188	137.878	148.689	92.3777	120.278	cacna1da	calcium channel, voltage-dependent, L type, alpha 1D subunit, a
ENSDARG00000062346	274.654	0.492553	0.161152	3.05645	0.00223976	0.0117293	1057	1124	851	880	728.686	795.839	520.619	563.002	cacna1e	calcium voltage-gated channel subunit alpha1 E
ENSDARG00000095614	81.6616	0.170664	0.24593	0.693956	0.48771	0.694138	191	215	228	176	131.674	152.229	139.484	112.6	cacna1eb	calcium channel, voltage-dependent, R type, alpha 1E subunit b
ENSDARG00000010933	4.0605	2.49894	1.17688	2.12336	0.0337241	0.108531	16	14	6	0	11.0303	9.91259	3.67064	0	cacna1fa	calcium channel, voltage-dependent, L type, alpha 1F subunit a
ENSDARG00000089913	185.467	0.341455	0.15491	2.20421	0.0275095	0.0922716	467	518	418	450	321.946	366.766	255.721	287.899	cacna1g	calcium channel, voltage-dependent, T type, alpha 1G subunit
ENSDARG00000060496	281.49	0.514792	0.171695	2.99829	0.00271497	0.0138214	800	886	699	621	551.513	627.325	427.629	397.3	cacna1ha	calcium channel, voltage-dependent, T type, alpha 1H subunit a
ENSDARG00000099708	13.4137	0.472605	0.517845	0.912639	0.361432	0.582371	26	42	32	23	17.9242	29.7378	19.5767	14.7148	cacna1hb	calcium channel, voltage-dependent, T type, alpha 1H subunit b
ENSDARG00000070522	193.695	0.907397	0.148426	6.11348	9.7484e-10	1.80405e-08	713	737	420	443	491.536	521.827	256.945	283.42	cacna1i	calcium channel, voltage-dependent, T type, alpha 1I subunit
ENSDARG00000029457	1.6184	-0.277387	1.7656	-0.157106	0.875161		3	0	1	3	2.06817	0	0.611773	1.91933	cacna1sa	calcium channel, voltage-dependent, L type, alpha 1S subunit, a
ENSDARG00000042552	1.48548	0.483688	1.74735	0.276812	0.781924		4	1	3	1	2.75756	0.708042	1.83532	0.639775	cacna1sb	calcium channel, voltage-dependent, L type, alpha 1S subunit, b
ENSDARG00000014804	118.872	-0.259372	0.23945	-1.0832	0.27872	0.495487	279	227	351	325	192.34	160.725	214.732	207.927	cacna2d1a	calcium channel, voltage-dependent, alpha 2/delta subunit 1a
ENSDARG00000103390	731.876	0.312871	0.0915219	3.41854	0.000629583	0.00389495	2201	2268	2088	1933	1517.35	1605.84	1277.38	1236.69	cacna2d2a	calcium channel, voltage-dependent, alpha 2/delta subunit 2a
ENSDARG00000078169	414.581	0.177847	0.123986	1.43441	0.151454	0.331501	1004	991	1113	861	692.149	701.669	680.903	550.847	cacna2d2b	calcium channel, voltage-dependent, alpha 2/delta subunit 2b
ENSDARG00000078760	18.0118	-0.182505	0.588884	-0.309917	0.756624	0.878082	20	34	45	24	13.7878	24.0734	27.5298	15.3546	cacna2d3	calcium channel, voltage dependent, alpha2/delta subunit 3
ENSDARG00000023886	133.346	1.07956	0.555056	1.94495	0.0517805	0.1514	376	316	178	187	259.211	223.741	108.896	119.638	cacna2d4b	calcium channel, voltage-dependent, alpha 2/delta subunit 4b
ENSDARG00000002167	294.576	0.166865	0.127015	1.31374	0.188933	0.384008	703	732	751	678	484.642	518.287	459.441	433.768	cacnb1	calcium channel, voltage-dependent, beta 1 subunit
ENSDARG00000099045	123.371	0.0292921	0.188793	0.155155	0.876699	0.943832	330	333	377	349	227.499	235.778	230.638	223.282	cacnb2a	calcium channel, voltage-dependent, beta 2a
ENSDARG00000055565	73.5019	0.770347	0.251622	3.06153	0.00220211	0.0115811	264	198	152	150	181.999	140.192	92.9895	95.9663	cacnb2b	calcium channel, voltage-dependent, beta 2b
ENSDARG00000001881	70.2715	0.621065	0.249928	2.48497	0.0129561	0.0503898	176	177	119	137	121.333	125.323	72.801	87.6492	cacnb3a	calcium channel, voltage-dependent, beta 3a
ENSDARG00000076030	36.5415	0.0634154	0.362344	0.175014	0.861068	0.936991	70	69	59	89	48.2574	48.8549	36.0946	56.94	cacnb3b	calcium channel, voltage-dependent, beta 3b
ENSDARG00000009738	91.9892	0.668772	0.225192	2.96978	0.00298013	0.0149049	266	191	147	173	183.378	135.236	89.9306	110.681	cacnb4a	calcium channel, voltage-dependent, beta 4a subunit
ENSDARG00000062174	715.944	0.64088	0.113509	5.64606	1.64168e-08	2.54609e-07	1998	1803	1277	1440	1377.4	1276.6	781.234	921.277	cacnb4b	calcium channel, voltage-dependent, beta 4b subunit
ENSDARG00000008772	22.8403	-0.746172	0.44992	-1.65845	0.0972258	0.242367	26	31	58	49	17.9242	21.9493	35.4828	31.349	cacng1a	calcium channel, voltage-dependent, gamma subunit 1a
ENSDARG00000052360	17.4855	-1.03453	0.532199	-1.94389	0.0519091	0.15163	9	15	28	27	6.20452	10.6206	17.1296	17.2739	cacng1b	calcium channel, voltage-dependent, gamma subunit 1b
ENSDARG00000032565	351.649	-0.131356	0.112885	-1.16363	0.244573	0.455205	672	682	795	860	463.271	482.885	486.359	550.207	cacng2a	calcium channel, voltage-dependent, gamma subunit 2a
ENSDARG00000102376	319.32	-0.0583752	0.129064	-0.452296	0.651056	0.81351	879	824	980	999	605.975	583.426	599.537	639.136	cacng2b	calcium channel, voltage-dependent, gamma subunit 2b
ENSDARG00000058460	1.51086	-3.30754	2.37564	-1.39227	0.16384		0	0	0	4	0	0	0	2.5591	cacng3a	calcium channel, voltage-dependent, gamma subunit 3a
ENSDARG00000076401	316.153	-0.250235	0.145618	-1.71843	0.0857179	0.220713	272	333	394	410	187.514	235.778	241.038	262.308	cacng3b	calcium channel, voltage-dependent, gamma subunit 3b
ENSDARG00000039238	82.6379	-1.34619	0.241682	-5.57006	2.54646e-08	3.84326e-07	71	86	222	224	48.9468	60.8916	135.814	143.31	cacng4a	calcium channel, voltage-dependent, gamma subunit 4a
ENSDARG00000074669	28.2817	-0.518111	0.406557	-1.27439	0.202526	0.402109	54	36	82	62	37.2271	25.4895	50.1654	39.6661	cacng4b	calcium channel, voltage-dependent, gamma subunit 4b
ENSDARG00000003326	85.3305	-1.01545	0.276636	-3.67072	0.000241869	0.00167543	83	74	199	156	57.2194	52.3951	121.743	99.805	cacng5a	calcium channel, voltage-dependent, gamma subunit 5a
ENSDARG00000039240	223.473	-0.474345	0.149514	-3.17258	0.00151093	0.00832922	466	507	779	732	321.256	358.977	476.571	468.316	cacng5b	calcium channel, voltage-dependent, gamma subunit 5b
ENSDARG00000036457	2.76831	2.004	1.41583	1.41543	0.156944		13	5	3	2	8.96208	3.54021	1.83532	1.27955	cacng6a	calcium channel, voltage-dependent, gamma subunit 6a
ENSDARG00000046079	7.64291	0.843198	0.75155	1.12194	0.261886	0.476635	31	27	16	20	21.3711	19.1171	9.78836	12.7955	cacng6b	calcium channel, voltage-dependent, gamma subunit 6b
ENSDARG00000063006	54.8034	0.925882	0.329437	2.8105	0.00494645	0.022865	245	197	118	141	168.901	139.484	72.1892	90.2083	cacng7a	calcium channel, voltage-dependent, gamma subunit 7a
ENSDARG00000070624	248.317	0.204859	0.142863	1.43395	0.151586	0.331687	764	758	699	774	526.695	536.696	427.629	495.186	cacng7b	calcium channel, voltage-dependent, gamma subunit 7b
ENSDARG00000020450	317.995	-0.306828	0.142882	-2.14742	0.03176	0.103303	614	628	840	875	423.286	444.65	513.889	559.803	cacng8a	calcium channel, voltage-dependent, gamma subunit 8a
ENSDARG00000070626	307.426	0.457075	0.170111	2.68692	0.00721138	0.0311501	855	676	530	710	589.429	478.636	324.24	454.241	cacng8b	calcium channel, voltage-dependent, gamma subunit 8b
ENSDARG00000059866	116.895	0.164944	0.21396	0.77091	0.44076	0.654399	172	190	158	202	118.575	134.528	96.6601	129.235	cactin	cactin
ENSDARG00000021885	134.663	0.474287	0.203235	2.33369	0.019612	0.0704989	174	177	170	113	119.954	125.323	104.001	72.2946	cacul1	CDK2 associated cullin domain 1
ENSDARG00000014731	984.12	0.14871	0.101462	1.46567	0.142739	0.318631	1989	1891	1956	1951	1371.2	1338.91	1196.63	1248.2	cacybp	calcyclin binding protein
ENSDARG00000041895	460.797	0.167846	0.123147	1.36297	0.172893	0.362275	592	580	557	607	408.119	410.664	340.757	388.344	cad	carbamoyl-phosphate synthetase 2, aspartate transcarbamylase, and dihydroorotase
ENSDARG00000031075	213.669	0.0931098	0.229533	0.405648	0.685001	0.835554	334	338	313	389	230.257	239.318	191.485	248.873	cadm1a	cell adhesion molecule 1a
ENSDARG00000042677	179.007	0.0131098	0.167795	0.0781299	0.937725	0.971101	396	379	419	438	272.999	268.348	256.333	280.222	cadm1b	cell adhesion molecule 1b
ENSDARG00000009930	1683.55	0.222422	0.0833507	2.66851	0.00761895	0.032557	1904	1923	1941	1726	1312.6	1361.56	1187.45	1104.25	cadm2a	cell adhesion molecule 2a
ENSDARG00000062633	269.856	0.0718573	0.137316	0.5233	0.600766	0.780079	700	632	754	662	482.574	447.482	461.277	423.531	cadm2b	cell adhesion molecule 2b
ENSDARG00000057013	2384.6	0.190664	0.0617094	3.0897	0.00200356	0.010697	3943	3624	3677	3722	2718.27	2565.94	2249.49	2381.24	cadm3	cell adhesion molecule 3
ENSDARG00000040291	4847.3	-0.180926	0.0594324	-3.04423	0.00233275	0.0121478	3817	3426	4775	4395	2631.41	2425.75	2921.21	2811.81	cadm4	cell adhesion molecule 4
ENSDARG00000013312	370.61	-0.42485	0.116729	-3.63962	0.000273042	0.00186416	745	716	1134	1057	513.596	506.958	693.75	676.243	cadps2	Ca++-dependent secretion activator 2
ENSDARG00000043661	171.208	0.217718	0.146539	1.48574	0.137348	0.309867	581	563	541	557	400.536	398.628	330.969	356.355	cadpsa	Ca2+-dependent activator protein for secretion a
ENSDARG00000070567	893.548	0.27548	0.101883	2.70388	0.00685344	0.0298637	2501	2591	2339	2359	1724.17	1834.54	1430.94	1509.23	cadpsb	Ca2+-dependent activator protein for secretion b
ENSDARG00000011166	3874.87	0.432119	0.0709597	6.08964	1.13168e-09	2.07628e-08	3705	3419	2918	2974	2554.19	2420.79	1785.15	1902.69	cahz	carbonic anhydrase
ENSDARG00000031598	188.937	0.487405	0.145313	3.35417	0.000796022	0.00479409	652	585	473	511	449.483	414.204	289.368	326.925	calb1	calbindin 1
ENSDARG00000041062	425.824	0.529247	0.128368	4.12288	3.7416e-05	0.000317086	788	763	604	596	543.24	540.236	369.511	381.306	calb2a	calbindin 2a
ENSDARG00000036344	62.3498	0.267465	0.243599	1.09797	0.272217	0.489358	167	169	164	148	115.128	119.659	100.331	94.6868	calb2b	calbindin 2b
ENSDARG00000056590	19.9836	-0.56141	0.47652	-1.17815	0.238739	0.448487	68	64	123	95	46.8786	45.3147	75.248	60.7787	calca	calcitonin/calcitonin-related polypeptide, alpha
ENSDARG00000036695	1928.82	0.344238	0.066597	5.16896	2.35395e-07	3.05228e-06	3450	3297	3127	2812	2378.4	2334.41	1913.01	1799.05	calcoco1a	calcium binding and coiled-coil domain 1a
ENSDARG00000016391	20.6447	0.995443	0.451574	2.20439	0.0274972	0.0922715	66	66	39	35	45.4998	46.7308	23.8591	22.3921	calcoco1b	calcium binding and coiled-coil domain 1b
ENSDARG00000052515	355.294	0.0956913	0.140681	0.680199	0.496378	0.701844	417	382	369	464	287.476	270.472	225.744	296.856	calcoco2	calcium binding and coiled-coil domain 2
ENSDARG00000028845	74.4997	0.49516	0.26963	1.83644	0.0662927	0.182913	174	182	138	144	119.954	128.864	84.4246	92.1277	calcr	calcitonin receptor
ENSDARG00000011473	194.606	-0.080763	0.176392	-0.45786	0.647053	0.810717	419	409	498	480	288.855	289.589	304.663	307.092	calcrla	calcitonin receptor-like a
ENSDARG00000011571	9.75205	-2.02972	0.681179	-2.97972	0.00288508	0.0145144	9	13	64	37	6.20452	9.20454	39.1535	23.6717	calcrlb	calcitonin receptor-like b
ENSDARG00000086391	8.78172	0.584949	0.72065	0.811696	0.416966	0.634285	26	28	14	26	17.9242	19.8252	8.56482	16.6342	cald1b	caldesmon 1b
ENSDARG00000077021	0.328002	0.159295	6.20862	0.0256571	0.979531		0	0	0	0	0	0	0	0	calhm1	calcium homeostasis modulator 1
ENSDARG00000039482	10.2562	0.0580703	0.888688	0.0653439	0.9479	0.975301	15	14	13	18	10.3409	9.91259	7.95305	11.516	calhm2	calcium homeostasis modulator 2
ENSDARG00000079602	0.158055	-1.27338	6.76551	-0.188216	0.850707		0	0	1	0	0	0	0.611773	0	calhm3	calcium homeostasis modulator 3
ENSDARG00000021811	7238.13	0.433148	0.0689506	6.28201	3.34232e-10	6.45377e-09	22571	21897	18314	18450	15560.2	15504	11204	11803.9	calm1a	calmodulin 1a
ENSDARG00000034187	2778.25	0.246725	0.057333	4.30336	1.68224e-05	0.000154454	8080	7913	7657	7397	5570.28	5602.73	4684.34	4732.42	calm1b	calmodulin 1b
ENSDARG00000031427	5865.37	0.0482572	0.0691283	0.698083	0.485126	0.691796	14828	13960	15881	15208	10222.3	9884.26	9715.56	9729.7	calm2a	calmodulin 2a (phosphorylase kinase, delta)
ENSDARG00000015050	11316.8	0.334318	0.0600095	5.57109	2.53156e-08	3.82889e-07	20104	19105	17406	17309	13859.5	13527.1	10648.5	11073.9	calm2b	calmodulin 2b, (phosphorylase kinase, delta)
ENSDARG00000100825	2612.63	0.335872	0.0604805	5.5534	2.80171e-08	4.19883e-07	6034	6018	5277	5383	4159.79	4261	3228.32	3443.91	calm3a	calmodulin 3a (phosphorylase kinase, delta)
ENSDARG00000074057	14943.8	0.214955	0.0507805	4.23301	2.30582e-05	0.000205265	32194	30570	31675	28748	22194.3	21644.8	19377.9	18392.3	calm3b	calmodulin 3b (phosphorylase kinase, delta)
ENSDARG00000075800	9.07594	-2.23326	0.683981	-3.26509	0.00109428	0.00628719	7	11	56	39	4.82574	7.78846	34.2593	24.9512	calml4a	calmodulin-like 4a
ENSDARG00000059347	1.73323	0.171495	1.56175	0.10981	0.91256		2	4	4	2	1.37878	2.83217	2.44709	1.27955	calml4b	calmodulin-like 4b
ENSDARG00000088898	74.4073	0.216646	0.351782	0.615851	0.537993	0.734808	155	142	188	99	106.856	100.542	115.013	63.3378	caln1	calneuron 1
ENSDARG00000069766	114.014	0.0787192	0.193172	0.407509	0.683634	0.834574	177	184	198	184	122.022	130.28	121.131	117.719	caln2	calneuron 2
ENSDARG00000076290	3317.96	0.0170895	0.0557194	0.306706	0.759067	0.879388	3479	3284	3744	3717	2398.39	2325.21	2290.48	2378.05	calr	calreticulin
ENSDARG00000103979	2471.76	-0.469191	0.0740806	-6.33353	2.39617e-10	4.72072e-09	1700	1734	2690	2620	1171.96	1227.74	1645.67	1676.21	calr3a	calreticulin 3a
ENSDARG00000102808	795.033	-0.605067	0.0860905	-7.02827	2.09114e-12	5.17479e-11	634	649	1079	1100	437.074	459.519	660.103	703.753	calr3b	calreticulin 3b
ENSDARG00000045676	1682.17	0.0547121	0.094159	0.581061	0.561199	0.751067	763	785	912	755	526.005	555.813	557.937	483.03	calua	calumenin a
ENSDARG00000005115	270.464	-0.11896	0.217167	-0.547783	0.583841	0.767293	108	170	206	133	74.4542	120.367	126.025	85.0901	calub	calumenin b
ENSDARG00000036008	363.13	0.44366	0.114967	3.85903	0.000113839	0.000862111	679	752	602	574	468.096	532.447	368.287	367.231	caly	calcyon neuron-specific vesicular protein
ENSDARG00000060116	92.1961	0.561254	0.258087	2.17467	0.0296552	0.0980517	326	265	258	190	224.741	187.631	157.837	121.557	camk1a	calcium/calmodulin-dependent protein kinase Ia
ENSDARG00000029474	201.164	0.091439	0.152855	0.598208	0.549701	0.742094	562	526	574	566	387.438	372.43	351.158	362.113	camk1b	calcium/calmodulin-dependent protein kinase Ib
ENSDARG00000074905	76.2422	0.749383	0.237347	3.15733	0.0015922	0.00873662	199	198	141	123	137.189	140.192	86.26	78.6924	camk1da	calcium/calmodulin-dependent protein kinase 1Da
ENSDARG00000017446	255.884	0.0609131	0.163893	0.371665	0.710143	0.851964	572	481	614	514	394.332	340.568	375.628	328.845	camk1db	calcium/calmodulin-dependent protein kinase 1Db
ENSDARG00000044526	62.7252	-1.1549	0.286698	-4.02829	5.61835e-05	0.000455353	211	137	429	434	145.461	97.0017	262.45	277.663	camk1ga	calcium/calmodulin-dependent protein kinase IGa
ENSDARG00000008788	190.672	-0.426274	0.15501	-2.74999	0.00595979	0.0266661	386	379	554	593	266.105	268.348	338.922	379.387	camk1gb	calcium/calmodulin-dependent protein kinase IGb
ENSDARG00000053617	743.992	-0.0535832	0.104425	-0.513128	0.607862	0.784291	1348	1349	1733	1399	929.299	955.148	1060.2	895.046	camk2a	calcium/calmodulin-dependent protein kinase II alpha
ENSDARG00000011065	1718.25	0.285894	0.0918405	3.11294	0.00185235	0.00998205	4820	4584	4232	4375	3322.86	3245.66	2589.02	2799.02	camk2b1	calcium/calmodulin-dependent protein kinase (CaM kinase) II beta 1
ENSDARG00000100089	173.969	-0.375741	0.201667	-1.86318	0.0624371	0.174667	327	374	524	493	225.431	264.808	320.569	315.409	camk2b1	calcium/calmodulin-dependent protein kinase (CaM kinase) II beta 1
ENSDARG00000043010	216.964	-0.0567634	0.141731	-0.400501	0.688788	0.83771	332	300	376	358	228.878	212.413	230.027	229.04	camk2d1	calcium/calmodulin-dependent protein kinase (CaM kinase) II delta 1
ENSDARG00000014273	2461.27	0.308025	0.080707	3.81658	0.000135313	0.00100408	6209	6027	5764	5280	4280.43	4267.37	3526.26	3378.01	camk2d2	calcium/calmodulin-dependent protein kinase (CaM kinase) II delta 2
ENSDARG00000071395	1177.91	0.0752484	0.0898364	0.837615	0.402247	0.620558	2248	2391	2524	2397	1549.75	1692.93	1544.11	1533.54	camk2g1	calcium/calmodulin-dependent protein kinase (CaM kinase) II gamma 1
ENSDARG00000056206	2308.98	0.395211	0.0671662	5.88408	4.00269e-09	6.7466e-08	2821	2815	2441	2346	1944.77	1993.14	1493.34	1500.91	camk2g2	calcium/calmodulin-dependent protein kinase (CaM kinase) II gamma 2
ENSDARG00000025855	3804.93	0.0757751	0.0650106	1.16558	0.243784	0.454656	7586	7292	8107	7661	5229.72	5163.04	4959.64	4901.32	camk2n1a	calcium/calmodulin-dependent protein kinase II inhibitor 1a
ENSDARG00000090424	530.385	0.100843	0.114687	0.879288	0.379245	0.599045	1066	945	1006	1085	734.891	669.1	615.443	694.156	camk2n2	calcium/calmodulin-dependent protein kinase II inhibitor 2
ENSDARG00000005372	1502.82	0.606732	0.0739087	8.2092	2.22662e-16	7.74458e-15	4393	4110	3106	3126	3028.49	2910.05	1900.17	1999.94	camk4	calcium/calmodulin-dependent protein kinase IV
ENSDARG00000035452	114.502	-0.0941221	0.186776	-0.50393	0.61431	0.788467	183	201	232	226	126.159	142.316	141.931	144.589	camkk1a	calcium/calmodulin-dependent protein kinase kinase 1, alpha a
ENSDARG00000015134	16.5484	-2.5413	0.586999	-4.32932	1.49574e-05	0.000138882	8	33	132	136	5.51513	23.3654	80.754	87.0094	camkk1b	calcium/calmodulin-dependent protein kinase kinase 1, alpha b
ENSDARG00000027963	183.081	-0.283033	0.159515	-1.77434	0.0760077	0.202397	367	332	469	480	253.006	235.07	286.921	307.092	camkva	CaM kinase-like vesicle-associated a
ENSDARG00000005141	780.536	0.209414	0.0913174	2.29325	0.0218337	0.0770897	2023	2185	2119	1950	1394.64	1547.07	1296.35	1247.56	camkvb	CaM kinase-like vesicle-associated b
ENSDARG00000057000	314.254	0.602451	0.149355	4.03369	5.49077e-05	0.000445689	797	805	690	492	549.445	569.974	422.123	314.769	camkvl	CaM kinase-like vesicle-associated, like
ENSDARG00000100409	153.891	0.20833	0.206883	1.007	0.313937	0.533411	313	262	245	309	215.779	185.507	149.884	197.691	camlg	calcium modulating ligand
ENSDARG00000019208	215.319	0.560974	0.139541	4.02014	5.81628e-05	0.00046979	617	617	466	468	425.354	436.862	285.086	299.415	camsap1a	calmodulin regulated spectrin-associated protein 1a
ENSDARG00000035122	333.339	0.32462	0.119945	2.70642	0.00680136	0.0296913	601	565	477	561	414.324	400.044	291.816	358.914	camsap1b	calmodulin regulated spectrin-associated protein 1b
ENSDARG00000062173	710.555	0.521858	0.121075	4.31019	1.63111e-05	0.000150146	1805	1864	1455	1400	1244.35	1319.79	890.129	895.686	camsap2a	calmodulin regulated spectrin-associated protein family, member 2a
ENSDARG00000059965	348.203	0.42917	0.146317	2.93316	0.00335533	0.0164803	978	864	804	724	674.224	611.748	491.865	463.197	camsap2b	calmodulin regulated spectrin-associated protein family, member 2b
ENSDARG00000059475	275.868	0.0516161	0.167494	0.308168	0.757955	0.878729	291	381	362	363	200.613	269.764	221.462	232.238	camsap3	calmodulin regulated spectrin-associated protein family, member 3
ENSDARG00000105435	26.4012	0.421628	0.39749	1.06072	0.288816	0.506743	57	83	60	57	39.2953	58.7675	36.7064	36.4672	camta1	calmodulin binding transcription activator 1
ENSDARG00000077428	437.151	0.647842	0.105882	6.11854	9.44357e-10	1.74915e-08	1396	1382	1026	955	962.39	978.514	627.679	610.985	camta1a	calmodulin binding transcription activator 1a
ENSDARG00000007824	2191.53	0.842989	0.070951	11.8813	1.4808e-32	1.27004e-30	4222	3977	2575	2528	2910.61	2815.88	1575.31	1617.35	camta1b	calmodulin binding transcription activator 1b
ENSDARG00000017841	871.374	0.214886	0.0822406	2.61289	0.00897791	0.0373674	1401	1280	1371	1210	965.837	906.294	838.74	774.128	cand1	cullin-associated and neddylation-dissociated 1
ENSDARG00000005749	0.466115	1.15916	3.42783	0.338161	0.735242		2	2	1	1	1.37878	1.41608	0.611773	0.639775	cand2	cullin-associated and neddylation-dissociated 2 (putative)
ENSDARG00000012192	482.281	-0.341939	0.115071	-2.97155	0.00296302	0.0148286	470	433	622	655	324.014	306.582	380.523	419.053	cant1a	calcium activated nucleotidase 1a
ENSDARG00000102977	248.716	0.122914	0.169201	0.726436	0.467572	0.676797	349	339	370	336	240.597	240.026	226.356	214.965	cant1b	calcium activated nucleotidase 1b
ENSDARG00000037488	9613.63	-0.365615	0.066051	-5.53535	3.10608e-08	4.63222e-07	6679	6667	10374	8858	4604.44	4720.51	6346.53	5667.13	canx	calnexin
ENSDARG00000016350	628.034	-0.527019	0.088426	-5.96	2.52237e-09	4.37949e-08	1124	1063	1818	1702	774.875	752.648	1112.2	1088.9	cap1	CAP, adenylate cyclase-associated protein 1 (yeast)
ENSDARG00000104478	109.485	-0.557039	0.230997	-2.41146	0.0158889	0.0595476	114	87	170	160	78.5906	61.5996	104.001	102.364	cap2	CAP, adenylate cyclase-associated protein, 2 (yeast)
ENSDARG00000035560	4.11277	-6.53158	1.70244	-3.83661	0.000124746	0.000932148	0	0	19	19	0	0	11.6237	12.1557	capga	capping protein (actin filament), gelsolin-like a
ENSDARG00000099672	160.416	-0.908376	0.580578	-1.5646	0.117676	0.278829	251	307	633	540	173.037	217.369	387.252	345.479	capgb	capping protein (actin filament), gelsolin-like b
ENSDARG00000076634	85.5991	0.918149	0.338058	2.71595	0.00660862	0.029016	45	43	26	26	31.0226	30.4458	15.9061	16.6342	capn10	calpain 10
ENSDARG00000010758	4.4807	0.40299	1.08474	0.371508	0.710259	0.852008	12	7	8	8	8.27269	4.95629	4.89418	5.1182	capn12	calpain 12
ENSDARG00000060600	56.6705	0.519463	0.306171	1.69665	0.0897634	0.228349	126	103	113	66	86.8633	72.9283	69.1303	42.2252	capn15	calpain 15
ENSDARG00000052702	1690.8	0.001974	0.0835488	0.0236269	0.98115	0.990379	732	711	768	840	504.634	503.418	469.841	537.411	capn1a	calpain 1, (mu/I) large subunit a
ENSDARG00000052748	280.172	0.24809	0.141584	1.75225	0.0797317	0.209096	435	447	463	368	299.885	316.495	283.251	235.437	capn1b	calpain 1, (mu/I) large subunit b
ENSDARG00000091699	261.635	-1.01338	0.22191	-4.56661	4.95668e-06	5.04071e-05	82	56	132	178	56.5301	39.6503	80.754	113.88	capn2a	calpain 2, (m/II) large subunit a
ENSDARG00000055592	94.5328	0.12605	0.261614	0.481818	0.629935	0.800042	121	87	122	91	83.4163	61.5996	74.6363	58.2196	capn2b	calpain 2, (m/II) large subunit b
ENSDARG00000041864	3.46858	0.155015	1.67461	0.0925682	0.926247		3	0	2	1	2.06817	0	1.22355	0.639775	capn3a	calpain 3a, (p94)
ENSDARG00000043035	2.4725	2.34675	1.8046	1.30043	0.193454		4	5	2	0	2.75756	3.54021	1.22355	0	capn3b	calpain 3b
ENSDARG00000103317	29.4553	0.00714261	0.41391	0.0172564	0.986232	0.993161	27	36	32	38	18.6136	25.4895	19.5767	24.3115	capn5a	calpain 5a
ENSDARG00000069748	97.4254	0.748513	0.245482	3.04915	0.00229486	0.0119827	309	226	207	149	213.022	160.017	126.637	95.3265	capn5b	calpain 5b
ENSDARG00000102987	249.861	-0.0492923	0.143838	-0.342694	0.731829	0.864966	320	345	364	404	220.605	244.274	222.685	258.469	capn7	calpain 7
ENSDARG00000055715	9.37985	-0.666193	0.695861	-0.957365	0.338383	0.560333	20	21	45	28	13.7878	14.8689	27.5298	17.9137	capn8	calpain 8
ENSDARG00000012341	10.5867	0.54704	0.786643	0.69541	0.486798	0.693302	15	29	24	10	10.3409	20.5332	14.6825	6.39775	capn9	calpain 9
ENSDARG00000035329	1741.06	-0.0475904	0.0800717	-0.594347	0.55228	0.744132	1691	1665	2026	1850	1165.76	1178.89	1239.45	1183.58	capns1a	calpain, small subunit 1 a
ENSDARG00000013804	1984.96	0.146615	0.0740391	1.98024	0.0476764	0.141767	4132	3950	4023	4125	2848.56	2796.77	2461.16	2639.07	capns1b	calpain, small subunit 1 b
ENSDARG00000009346	871.692	-0.0775033	0.0979691	-0.7911	0.428886	0.644294	911	921	1031	1126	628.035	652.106	630.738	720.387	caprin1a	cell cycle associated protein 1a
ENSDARG00000054272	1998.02	-0.152611	0.0606283	-2.51715	0.0118308	0.0467974	2501	2459	3081	3075	1724.17	1741.07	1884.87	1967.31	caprin1b	cell cycle associated protein 1b
ENSDARG00000020749	30.3758	0.81146	0.437081	1.85654	0.0633765	0.176647	56	34	24	33	38.6059	24.0734	14.6825	21.1126	caprin2	caprin family member 2
ENSDARG00000058486	33.7996	0.303834	0.425603	0.713892	0.475294	0.684172	26	16	22	16	17.9242	11.3287	13.459	10.2364	caps2	calcyphosine 2
ENSDARG00000103521	26.4523	-2.30428	0.51128	-4.50689	6.57835e-06	6.54952e-05	10	6	39	49	6.89391	4.24825	23.8591	31.349	capsla	calcyphosine-like a
ENSDARG00000003414	18.3919	-0.782545	0.512608	-1.52659	0.126862	0.293787	16	22	34	39	11.0303	15.5769	20.8003	24.9512	capslb	calcyphosine-like b
ENSDARG00000034240	1793.21	-0.200288	0.0667906	-2.99875	0.00271091	0.013807	2641	2553	3327	3335	1820.68	1807.63	2035.37	2133.65	capza1a	capping protein (actin filament) muscle Z-line, alpha 1a
ENSDARG00000056090	4551.16	-0.0445615	0.0691674	-0.644255	0.51941	0.720178	7528	6955	8517	8161	5189.74	4924.43	5210.47	5221.21	capza1b	capping protein (actin filament) muscle Z-line, alpha 1b
ENSDARG00000100252	3728.88	-0.313956	0.0636151	-4.93524	8.00539e-07	9.46639e-06	4282	3929	5708	5684	2951.97	2781.9	3492	3636.48	capzb	capping protein (actin filament) muscle Z-line, beta
ENSDARG00000060829	147.376	0.223376	0.176668	1.26439	0.206091	0.406736	318	314	260	343	219.226	222.325	159.061	219.443	car15	carbonic anhydrase 15
ENSDARG00000052741	26.6592	-0.135207	0.423101	-0.319561	0.749301	0.873744	58	54	88	50	39.9847	38.2343	53.836	31.9888	card11	caspase recruitment domain family, member 11
ENSDARG00000103485	11.1342	3.16293	0.944744	3.34792	0.000814214	0.00488574	12	20	2	2	8.27269	14.1608	1.22355	1.27955	card14	caspase recruitment domain family, member 14
ENSDARG00000091304	561.554	-0.290778	0.161624	-1.7991	0.0720036	0.194376	133	177	254	171	91.689	125.323	155.39	109.402	card19	caspase recruitment domain family, member 19
ENSDARG00000067672	98.2229	-1.20802	0.249912	-4.83379	1.33956e-06	1.51363e-05	99	132	280	316	68.2497	93.4615	171.296	202.169	card9	caspase recruitment domain family, member 9
ENSDARG00000019950	219.698	0.47354	0.17732	2.67054	0.00757286	0.032397	278	294	257	204	191.651	208.164	157.226	130.514	carf	calcium responsive transcription factor
ENSDARG00000053129	912.267	-0.166685	0.093744	-1.77809	0.0753897	0.201052	549	520	646	693	378.476	368.182	395.205	443.364	carhsp1	calcium regulated heat stable protein 1
ENSDARG00000077119	992.194	0.0181218	0.090352	0.200568	0.841036	0.92655	1308	1216	1444	1340	901.723	860.979	883.4	857.299	carkd	carbohydrate kinase domain containing
ENSDARG00000018698	1033.73	0.0355596	0.0809282	0.439396	0.660374	0.819749	1378	1402	1545	1485	949.981	992.675	945.189	950.066	carm1	coactivator-associated arginine methyltransferase 1
ENSDARG00000091531	5.4463	-0.734444	0.991646	-0.740631	0.458917	0.669534	10	5	20	8	6.89391	3.54021	12.2355	5.1182	carm1l	coactivator-associated arginine methyltransferase 1, like
ENSDARG00000102865	88.768	0.542679	0.24802	2.18804	0.0286665	0.0954179	132	110	115	71	90.9996	77.8846	70.3539	45.4241	carnmt1	carnosine N-methyltransferase 1
ENSDARG00000036164	635.785	0.00938955	0.115767	0.0811073	0.935357	0.970162	748	623	859	664	515.664	441.11	525.513	424.811	cars	cysteinyl-tRNA synthetase
ENSDARG00000078546	289.829	0.255816	0.137044	1.86667	0.0619475	0.173634	643	577	619	523	443.278	408.54	378.687	334.603	cars2	cysteinyl-tRNA synthetase 2, mitochondrial
ENSDARG00000045832	293.805	0.167188	0.142705	1.17156	0.241374	0.451461	875	834	772	924	603.217	590.507	472.289	591.152	cart2	cocaine- and amphetamine-regulated transcript 2
ENSDARG00000070142	64.8948	-0.702551	0.284741	-2.46733	0.0136125	0.0525027	107	75	161	169	73.7648	53.1031	98.4954	108.122	cart4	cocaine- and amphetamine-regulated transcript 4
ENSDARG00000016815	28.5066	-1.12319	0.612693	-1.83321	0.0667719	0.183855	6	8	14	20	4.13635	5.66433	8.56482	12.7955	casc1	cancer susceptibility candidate 1
ENSDARG00000029911	499.635	0.0744132	0.117679	0.63234	0.527165	0.726003	855	854	869	942	589.429	604.668	531.63	602.668	casc3	cancer susceptibility candidate 3
ENSDARG00000074490	961.977	0.145263	0.08205	1.77042	0.0766578	0.203468	1453	1302	1387	1393	1001.69	921.87	848.529	891.207	casc4	cancer susceptibility candidate 4
ENSDARG00000070239	24.457	0.42623	0.476775	0.893986	0.371329	0.591184	26	27	20	24	17.9242	19.1171	12.2355	15.3546	casc5	cancer susceptibility candidate 5
ENSDARG00000023900	320.538	0.0307088	0.129868	0.236461	0.813075	0.910924	490	484	543	522	337.802	342.692	332.193	333.963	casd1	CAS1 domain containing 1
ENSDARG00000059809	863.048	0.404111	0.0963536	4.19404	2.74028e-05	0.000239156	1307	1248	1121	1036	901.034	883.636	685.797	662.807	caska	calcium/calmodulin-dependent serine protein kinase a
ENSDARG00000046107	1066.31	0.286894	0.086781	3.30596	0.000946522	0.00555818	2213	2180	2054	1968	1525.62	1543.53	1256.58	1259.08	caskin1	CASK interacting protein 1
ENSDARG00000062052	168.393	0.0764751	0.169627	0.450844	0.652102	0.814117	310	279	329	295	213.711	197.544	201.273	188.734	casp2	caspase 2, apoptosis-related cysteine peptidase
ENSDARG00000017905	328.313	0.301263	0.147708	2.03958	0.0413919	0.127612	526	484	519	398	362.62	342.692	317.51	254.631	casp3a	caspase 3, apoptosis-related cysteine peptidase a
ENSDARG00000055045	21.9843	0.387137	0.601507	0.643612	0.519827	0.720451	25	53	37	30	17.2348	37.5262	22.6356	19.1933	casp3b	caspase 3, apoptosis-related cysteine peptidase b
ENSDARG00000093405	7.8949	1.82601	1.00173	1.82285	0.0683265	0.187189	14	2	2	3	9.65147	1.41608	1.22355	1.91933	casp6	caspase 6, apoptosis-related cysteine peptidase
ENSDARG00000025608	3.76623	2.67621	1.22474	2.18512	0.02888	0.0959642	11	12	1	3	7.5833	8.4965	0.611773	1.91933	casp6l1	caspase 6, apoptosis-related cysteine peptidase, like 1
ENSDARG00000070368	11.4625	-2.1598	1.27115	-1.69908	0.0893032	0.227584	0	2	5	5	0	1.41608	3.05886	3.19888	casp6l2	caspase 6, apoptosis-related cysteine peptidase, like 2
ENSDARG00000091836	199.457	-0.831244	0.198202	-4.19392	2.74171e-05	0.000239183	93	138	241	219	64.1134	97.7098	147.437	140.111	casp7	caspase 7, apoptosis-related cysteine peptidase
ENSDARG00000058325	218.91	-0.0319245	0.164612	-0.193938	0.846225	0.929533	226	264	286	274	155.802	186.923	174.967	175.298	casp8	caspase 8, apoptosis-related cysteine peptidase
ENSDARG00000022718	201.09	0.00550631	0.238329	0.0231038	0.981567	0.990706	309	236	321	285	213.022	167.098	196.379	182.336	casp8ap2	caspase 8 associated protein 2
ENSDARG00000058341	6.74501	0.33584	0.782542	0.429165	0.667803	0.824342	9	18	13	11	6.20452	12.7448	7.95305	7.03753	casp8l1	caspase 8, apoptosis-related cysteine peptidase, like 1
ENSDARG00000070272	10.4595	-0.652378	0.660261	-0.988061	0.323123	0.543526	15	19	37	23	10.3409	13.4528	22.6356	14.7148	casp8l2	caspase 8, apoptosis-related cysteine peptidase, like 2
ENSDARG00000004325	291.478	0.122884	0.147364	0.833882	0.404347	0.622809	502	467	545	450	346.074	330.656	333.416	287.899	casp9	caspase 9, apoptosis-related cysteine peptidase
ENSDARG00000008165	123.101	-1.03161	0.211116	-4.88645	1.02672e-06	1.1865e-05	246	254	608	535	169.59	179.843	371.958	342.28	caspa	caspase a
ENSDARG00000052039	322.404	-1.29069	0.150529	-8.57436	9.96387e-18	3.82026e-16	281	224	767	614	193.719	158.601	469.23	392.822	caspb	caspase b
ENSDARG00000094433	17.9738	2.66549	0.761836	3.49878	0.000467399	0.00298766	15	19	4	2	10.3409	13.4528	2.44709	1.27955	caspbl	caspase b, like
ENSDARG00000104367	46.3173	-0.64156	0.367375	-1.74633	0.0807531	0.211085	30	23	37	55	20.6817	16.285	22.6356	35.1876	caspxa	caspase Xa
ENSDARG00000038716	1.71888	1.1449	1.59829	0.716329	0.473788		5	1	1	2	3.44695	0.708042	0.611773	1.27955	casq1a	calsequestrin 1a
ENSDARG00000018105	2.78823	-1.32206	1.34927	-0.979832	0.327169		4	1	10	4	2.75756	0.708042	6.11773	2.5591	casq1b	calsequestrin 1b
ENSDARG00000008982	108.889	-0.612658	0.209453	-2.92503	0.00344419	0.0168355	124	126	217	210	85.4845	89.2133	132.755	134.353	casq2	calsequestrin 2
ENSDARG00000013649	0.236887	1.59612	5.84092	0.273265	0.784649		1	0	0	0	0.689391	0	0	0	casr	calcium sensing receptor
ENSDARG00000006775	107.592	-1.02047	0.24773	-4.11926	3.80092e-05	0.00032173	158	163	409	320	108.924	115.411	250.215	204.728	cass4	Cas scaffolding protein family member 4
ENSDARG00000058693	534.653	-0.180208	0.11872	-1.51792	0.129033	0.29704	597	514	685	719	411.566	363.933	419.064	459.998	cast	calpastatin
ENSDARG00000037030	350.383	-0.343549	0.130707	-2.62839	0.00857898	0.0359523	1068	1050	1463	1536	736.27	743.444	895.023	982.695	casz1	castor zinc finger 1
ENSDARG00000104702	2820.22	0.398861	0.0640679	6.2256	4.7973e-10	9.08254e-09	2269	2264	1946	1894	1564.23	1603.01	1190.51	1211.73	cat	catalase
ENSDARG00000063009	55.1876	-0.870426	0.400474	-2.17349	0.0297434	0.0982369	16	23	51	29	11.0303	16.285	31.2004	18.5535	catip	ciliogenesis associated TTC17 interacting protein
ENSDARG00000103747	274.558	-0.259418	0.129862	-1.99765	0.0457551	0.137572	853	817	1154	1079	588.05	578.47	705.986	690.318	cav1	caveolin 1
ENSDARG00000052000	73.9387	-1.48418	0.300219	-4.94366	7.6671e-07	9.08146e-06	44	62	150	181	30.3332	43.8986	91.7659	115.799	cav2	caveolin 2
ENSDARG00000024141	0.574368	2.61768	3.49851	0.748228	0.454322		0	2	0	0	0	1.41608	0	0	cav3	caveolin 3
ENSDARG00000045601	3.50345	0.700021	1.07466	0.651386	0.514797	0.716689	8	11	4	9	5.51513	7.78846	2.44709	5.75798	cax1	cation/H+ exchanger protein 1
ENSDARG00000015732	184.578	-0.0199601	0.174628	-0.114301	0.909	0.958907	160	171	192	183	110.303	121.075	117.46	117.079	cax2	cation/H+ exchanger protein 2
ENSDARG00000071325	275.199	0.188685	0.133982	1.40829	0.159044	0.342428	746	783	765	734	514.286	554.397	468.006	469.595	cbarpb	calcium channel, voltage-dependent, beta subunit associated regulatory protein b
ENSDARG00000079012	564.122	0.412475	0.107336	3.84283	0.000121625	0.000911567	1762	1701	1565	1344	1214.71	1204.38	957.424	859.858	cbfa2t3	core-binding factor, runt domain, alpha subunit 2; translocated to, 3
ENSDARG00000040917	88.1119	-0.672139	0.22235	-3.02288	0.00250378	0.0128969	160	178	282	319	110.303	126.031	172.52	204.088	cbfb	core-binding factor, beta subunit
ENSDARG00000009958	1060.45	-0.272194	0.127011	-2.14308	0.0321071	0.104191	1979	2099	3112	2404	1364.3	1486.18	1903.84	1538.02	cbl	Cbl proto-oncogene, E3 ubiquitin protein ligase
ENSDARG00000015199	367.456	-0.556549	0.160378	-3.47022	0.000520026	0.00328765	541	535	936	833	372.961	378.802	572.619	532.933	cblb	Cbl proto-oncogene B, E3 ubiquitin protein ligase
ENSDARG00000078217	558.405	0.321391	0.158179	2.03181	0.0421725	0.129235	161	109	114	127	110.992	77.1766	69.7421	81.2515	cblc	Cbl proto-oncogene C, E3 ubiquitin protein ligase
ENSDARG00000015222	163.664	0.341581	0.194362	1.75745	0.0788417	0.207427	278	237	213	240	191.651	167.806	130.308	153.546	cbll1	Cbl proto-oncogene-like 1, E3 ubiquitin protein ligase
ENSDARG00000057296	442.362	-0.0725022	0.136305	-0.53191	0.594788	0.77557	1212	1180	1402	1406	835.542	835.489	857.705	899.524	cbln1	cerebellin 1 precursor
ENSDARG00000023157	0.0993796	-0.855403	6.68585	-0.127942	0.898195		0	1	0	2	0	0.708042	0	1.27955	cbln10	cerebellin 10
ENSDARG00000086654	0.0319888	-1.31034	6.76358	-0.193734	0.846384		0	0	0	1	0	0	0	0.639775	cbln11	cerebellin 11
ENSDARG00000068232	826.614	1.04729	0.0863434	12.1293	7.38587e-34	6.65539e-32	2322	2023	1177	1169	1600.77	1432.37	720.056	747.897	cbln12	cerebellin 12
ENSDARG00000026904	15.1618	-0.344485	0.551305	-0.624853	0.532068	0.729978	31	50	54	61	21.3711	35.4021	33.0357	39.0263	cbln13	cerebellin 13
ENSDARG00000053845	0.0319888	-1.31034	6.76358	-0.193734	0.846384		0	0	0	1	0	0	0	0.639775	cbln14	cerebellin 14
ENSDARG00000088911	0.414079	2.60206	3.75279	0.693368	0.488078		1	1	0	0	0.689391	0.708042	0	0	cbln17	cerebellin 17
ENSDARG00000090969	2.24246	1.38413	1.31938	1.04908	0.294142		9	5	4	2	6.20452	3.54021	2.44709	1.27955	cbln18	cerebellin 18
ENSDARG00000087476	2.49785	-1.91733	1.35694	-1.41298	0.15766		2	2	12	5	1.37878	1.41608	7.34127	3.19888	cbln20	cerebellin 20
ENSDARG00000074601	71.6968	-0.142987	0.244436	-0.584966	0.55857	0.748687	202	230	266	267	139.257	162.85	162.732	170.82	cbln2a	cerebellin 2a precursor
ENSDARG00000077151	369.185	0.464208	0.106046	4.37741	1.20096e-05	0.000113737	1326	1277	1096	1012	914.132	904.169	670.503	647.453	cbln2b	cerebellin 2b precursor
ENSDARG00000061240	263.268	-0.019184	0.137214	-0.13981	0.88881	0.950259	451	441	497	512	310.915	312.246	304.051	327.565	cbln4	cerebellin 4 precursor
ENSDARG00000035718	0.095184	-1.27338	6.76551	-0.188216	0.850707		0	0	1	0	0	0	0.611773	0	cbln6	cerebellin 6
ENSDARG00000019294	0.696607	-0.627947	6.53726	-0.0960566	0.923476		3	0	0	5	2.06817	0	0	3.19888	cbln8	cerebellin 8
[truncated: 30,191 more rows]

## Sheet: sigDEGs
	baseMean	log2FoldChange	lfcSE	stat	pvalue	padj	IL4_N_R1.x	IL4_N_R2.x	PBS_N_R1.x	PBS_N_R2.x	IL4_N_R1.y	IL4_N_R2.y	PBS_N_R1.y	PBS_N_R2.y	SYMBOL	GENENAME
ENSDARG00000000068	793.6	-1.00984	0.114173	-8.84489	9.16185e-19	3.80662e-17	340	287	706	703	234.393	203.208	431.912	449.762	slc9a3r1	solute carrier family 9, subfamily A (NHE3, cation proton antiporter 3), member 3 regulator 1
ENSDARG00000000212	118.811	1.41278	0.203505	6.94226	3.85877e-12	9.32216e-11	301	357	130	146	207.507	252.771	79.5305	93.4072	krt97	keratin 97
ENSDARG00000000349	25.6478	-2.17991	0.522538	-4.17178	3.02236e-05	0.000261317	8	8	42	39	5.51513	5.66433	25.6945	24.9512	si:rp71-1p14.7	si:rp71-1p14.7
ENSDARG00000000380	55.0196	-2.42163	0.2749	-8.80912	1.26129e-18	5.17007e-17	72	70	490	362	49.6361	49.5629	299.769	231.599	pde6a	phosphodiesterase 6A, cGMP-specific, rod, alpha
ENSDARG00000000563	29.717	1.21175	0.423155	2.8636	0.00418852	0.0199088	125	186	94	57	86.1739	131.696	57.5066	36.4672	ttnb	titin b
ENSDARG00000000767	1090.6	-1.33875	0.0861201	-15.5452	1.71557e-54	3.00309e-52	1529	1514	4310	4284	1054.08	1071.98	2636.74	2740.8	spi1b	Spi-1 proto-oncogene b
ENSDARG00000000906	111.546	-1.23457	0.195158	-6.32597	2.51647e-10	4.94859e-09	129	141	336	373	88.9314	99.8339	205.556	238.636	skap2	src kinase associated phosphoprotein 2
ENSDARG00000001234	117.864	-1.12603	0.1995	-5.64427	1.65888e-08	2.57091e-07	198	190	489	457	136.499	134.528	299.157	292.377	map4k2	mitogen-activated protein kinase kinase kinase kinase 2
ENSDARG00000001437	120.221	-2.51743	0.223147	-11.2815	1.61962e-29	1.21791e-27	100	129	790	678	68.9391	91.3374	483.3	433.768	slc2a1a	solute carrier family 2 (facilitated glucose transporter), member 1a
ENSDARG00000001686	24.7119	-1.80069	0.417947	-4.30842	1.64422e-05	0.000151158	41	32	151	133	28.265	22.6573	92.3777	85.0901	uckl1a	uridine-cytidine kinase 1-like 1a
ENSDARG00000001817	17.0866	1.11751	0.495938	2.25332	0.0242388	0.083707	50	30	18	23	34.4695	21.2413	11.0119	14.7148	zmp:0000000521	zmp:0000000521
ENSDARG00000001825	47.1413	-1.10882	0.368193	-3.01153	0.00259939	0.0133251	27	17	59	47	18.6136	12.0367	36.0946	30.0694	cfap43	cilia and flagella associated protein 43
ENSDARG00000001870	23.6094	-1.44087	0.397622	-3.62372	0.000290391	0.00196688	40	31	108	107	27.5756	21.9493	66.0715	68.456	atp1a1a.4	ATPase, Na+/K+ transporting, alpha 1a polypeptide, tandem duplicate 4
ENSDARG00000001906	19.4918	-1.59347	0.519188	-3.06916	0.00214661	0.0113434	16	34	83	86	11.0303	24.0734	50.7771	55.0207	si:dkey-247m21.3	si:dkey-247m21.3
ENSDARG00000001975	122.279	-2.37898	0.217353	-10.9453	7.002e-28	4.96793e-26	58	56	358	305	39.9847	39.6503	219.015	195.131	hsd11b2	hydroxysteroid (11-beta) dehydrogenase 2
ENSDARG00000001976	21.3474	-2.24063	0.521387	-4.29744	1.72786e-05	0.000157895	44	18	169	157	30.3332	12.7448	103.39	100.445	fkbp16	FK506 binding protein 16
ENSDARG00000002002	340.497	-1.06434	0.153602	-6.92917	4.23302e-12	1.01688e-10	171	178	436	380	117.886	126.031	266.733	243.115	lmcd1	LIM and cysteine-rich domains 1
ENSDARG00000002172	2493.31	-1.32098	0.0725208	-18.2151	3.91451e-74	1.16109e-71	2252	2098	6018	6110	1552.51	1485.47	3681.65	3909.03	aplnra	apelin receptor a
ENSDARG00000002193	26.7105	-3.92965	0.435945	-9.01411	1.98474e-19	8.68569e-18	23	15	310	335	15.856	10.6206	189.65	214.325	rho	rhodopsin
ENSDARG00000002197	185.004	1.04035	0.191372	5.43624	5.4416e-08	7.83092e-07	160	171	101	79	110.303	121.075	61.789	50.5423
ENSDARG00000002235	276.928	-1.13937	0.167303	-6.81022	9.74503e-12	2.24504e-10	110	88	252	235	75.833	62.3077	154.167	150.347	mmp14a	matrix metallopeptidase 14a (membrane-inserted)
ENSDARG00000002445	59.4341	-1.59446	0.360111	-4.4277	9.52426e-06	9.19946e-05	72	63	181	272	49.6361	44.6066	110.731	174.019	prdm1a	PR domain containing 1a, with ZNF domain
ENSDARG00000002508	23.3102	-2.60616	0.447678	-5.8215	5.83235e-09	9.53719e-08	29	33	241	182	19.9923	23.3654	147.437	116.439	ankrd33ab	ankyrin repeat domain 33Ab
ENSDARG00000002509	1362.42	-1.06286	0.0861835	-12.3325	6.05503e-35	5.64678e-33	2123	2089	5156	4678	1463.58	1479.1	3154.3	2992.87	zgc:153911	zgc:153911
ENSDARG00000002589	21.9165	1.36188	0.480278	2.83562	0.00457374	0.0214016	29	49	18	16	19.9923	34.694	11.0119	10.2364	mylpfb	myosin light chain, phosphorylatable, fast skeletal muscle b
ENSDARG00000002634	77.7878	-1.22044	0.252507	-4.83331	1.34283e-06	1.51653e-05	99	96	246	261	68.2497	67.972	150.496	166.981	b4galt1	UDP-Gal:betaGlcNAc beta 1,4- galactosyltransferase, polypeptide 1
ENSDARG00000002696	15.9876	-2.32788	0.628413	-3.70438	0.000211909	0.00149555	16	28	163	86	11.0303	19.8252	99.719	55.0207	gnb3b	guanine nucleotide binding protein (G protein), beta polypeptide 3b
ENSDARG00000002847	12.9033	1.58878	0.573773	2.76901	0.00562269	0.0253919	39	58	15	21	26.8862	41.0664	9.17659	13.4353	fndc1	fibronectin type III domain containing 1
ENSDARG00000002956	111.59	-1.51476	0.257799	-5.87575	4.20924e-09	7.05683e-08	86	116	363	284	59.2876	82.1328	222.073	181.696	si:dkey-32n7.4	si:dkey-32n7.4
ENSDARG00000003216	1747.11	-1.80903	0.0888195	-20.3675	3.24882e-92	1.5083e-89	790	700	2954	2874	544.619	495.629	1807.18	1838.71	anxa2a	annexin A2a
ENSDARG00000003219	4.52199	-5.44824	1.67937	-3.24422	0.00117773	0.00670887	0	0	11	7	0	0	6.7295	4.47843	bin2a	bridging integrator 2a
ENSDARG00000003326	85.3305	-1.01545	0.276636	-3.67072	0.000241869	0.00167543	83	74	199	156	57.2194	52.3951	121.743	99.805	cacng5a	calcium channel, voltage-dependent, gamma subunit 5a
ENSDARG00000003462	52.6187	1.43064	0.275167	5.19915	2.00201e-07	2.623e-06	156	167	72	62	107.545	118.243	44.0476	39.6661	fech	ferrochelatase
ENSDARG00000003533	13.4913	-2.19427	0.658651	-3.33146	0.000863913	0.00514781	7	8	47	30	4.82574	5.66433	28.7533	19.1933	col8a1b	collagen, type VIII, alpha 1b
ENSDARG00000003635	36.6794	-1.2058	0.418056	-2.8843	0.00392284	0.0188431	27	49	117	80	18.6136	34.694	71.5774	51.182	mogat3b	monoacylglycerol O-acyltransferase 3b
ENSDARG00000003750	80.0092	-1.23404	0.31205	-3.95464	7.66504e-05	0.000603569	29	30	78	77	19.9923	21.2413	47.7183	49.2627	pfas	phosphoribosylformylglycinamidine synthase
ENSDARG00000003808	131.919	1.16059	0.202482	5.73182	9.93579e-09	1.57726e-07	320	314	169	148	220.605	222.325	103.39	94.6868	aqp3a	aquaporin 3a
ENSDARG00000003902	38.0108	1.39277	0.525973	2.64798	0.00809739	0.0342363	32	22	15	8	22.0605	15.5769	9.17659	5.1182	ctsl.1	cathepsin L.1
ENSDARG00000003931	784.164	-1.12555	0.10659	-10.5596	4.58685e-26	3.01405e-24	563	570	1423	1339	388.127	403.584	870.553	856.659	cndp2	CNDP dipeptidase 2 (metallopeptidase M20 family)
ENSDARG00000003971	6.31524	1.8223	0.815144	2.23555	0.0253811	0.0866984	19	19	6	6	13.0984	13.4528	3.67064	3.83865	isl2a	ISL LIM homeobox 2a
ENSDARG00000004018	269.903	-1.00158	0.135836	-7.37346	1.6625e-13	4.56355e-12	226	214	538	447	155.802	151.521	329.134	285.98	si:ch211-236h17.3	si:ch211-236h17.3
ENSDARG00000004059	79.3801	-1.09386	0.294487	-3.71445	0.000203646	0.00144872	37	29	71	86	25.5075	20.5332	43.4359	55.0207	galk2	galactokinase 2
ENSDARG00000004105	98.4468	-1.6703	0.266609	-6.26499	3.72839e-10	7.14753e-09	137	105	458	402	94.4466	74.3444	280.192	257.19	tie1	endothelium-specific receptor tyrosine kinase 1
ENSDARG00000004392	23.6569	1.3419	0.532875	2.51822	0.011795	0.0466815	21	31	14	9	14.4772	21.9493	8.56482	5.75798	hdr	hematopoietic death receptor
ENSDARG00000004433	109.828	-1.00866	0.23107	-4.36518	1.2702e-05	0.000119658	144	146	311	340	99.2723	103.374	190.261	217.524	btk	Bruton agammaglobulinemia tyrosine kinase
ENSDARG00000004451	1128.18	-1.91578	0.0926762	-20.6718	6.21585e-95	3.08711e-92	506	530	2302	2068	348.832	375.262	1408.3	1323.06	tnfrsfa	tumor necrosis factor receptor superfamily, member a
ENSDARG00000004459	136.782	-2.92849	0.187266	-15.6381	4.00298e-55	7.18384e-53	134	147	1182	1207	92.3784	104.082	723.115	772.209	unc119.2	unc-119 lipid binding chaperone B homolog 2
ENSDARG00000004517	182.406	-1.65173	0.240531	-6.86703	6.55533e-12	1.54011e-10	44	36	156	125	30.3332	25.4895	95.4365	79.9719	ppat	phosphoribosyl pyrophosphate amidotransferase
ENSDARG00000004529	53.7296	-1.01706	0.278114	-3.657	0.000255184	0.00175401	48	44	109	99	33.0908	31.1538	66.6832	63.3378	zgc:173742	zgc:173742
ENSDARG00000004539	615.308	-1.30323	0.101486	-12.8415	9.60465e-38	9.81421e-36	557	465	1490	1327	383.991	329.239	911.541	848.982	ptgs2a	prostaglandin-endoperoxide synthase 2a
ENSDARG00000004643	44.9384	-2.23467	0.383694	-5.8241	5.74211e-09	9.39681e-08	60	32	240	242	41.3635	22.6573	146.825	154.826	cdhr1a	cadherin-related family member 1a
ENSDARG00000004794	96.2839	-1.04347	0.29546	-3.53167	0.000412943	0.00267967	57	28	92	103	39.2953	19.8252	56.2831	65.8969	ccdc146	coiled-coil domain containing 146
ENSDARG00000004952	524.5	1.16267	0.107883	10.7772	4.41225e-27	2.97249e-25	931	911	469	450	641.823	645.026	286.921	287.899	rsad2	radical S-adenosyl methionine domain containing 2
ENSDARG00000004953	61.4277	2.82295	0.596729	4.7307	2.23748e-06	2.4268e-05	32	25	6	3	22.0605	17.701	3.67064	1.91933	mxb	myxovirus (influenza) resistance B
ENSDARG00000004954	2453.24	-2.04355	0.0685614	-29.8061	3.25477e-195	1.39018e-191	1312	1286	6386	5588	904.481	910.542	3906.78	3575.06	grna	granulin a
ENSDARG00000005004	32.3774	-1.06019	0.355626	-2.98119	0.00287128	0.0144552	84	79	180	199	57.9088	55.9353	110.119	127.315	slc5a12	solute carrier family 5 (sodium/monocarboxylate cotransporter), member 12
ENSDARG00000005191	668.652	-1.31363	0.12056	-10.8961	1.20265e-27	8.3389e-26	734	712	2041	1973	506.013	504.126	1248.63	1262.28	ahcy	adenosylhomocysteinase
ENSDARG00000005364	51.527	-1.05081	0.305013	-3.44513	0.000570786	0.003581	38	80	142	132	26.1969	56.6433	86.8717	84.4503	grin3ba	glutamate receptor, ionotropic, N-methyl-D-aspartate 3Ba
ENSDARG00000005368	270.86	-1.00633	0.164124	-6.13151	8.70492e-10	1.61795e-08	510	526	1110	1212	351.589	372.43	679.068	775.408	mcamb	melanoma cell adhesion molecule b
ENSDARG00000005392	11.3322	-2.47861	0.645365	-3.84062	0.000122722	0.000918306	8	19	93	76	5.51513	13.4528	56.8949	48.6229	slc5a5	solute carrier family 5 (sodium/iodide cotransporter), member 5
ENSDARG00000005414	292.281	-1.49072	0.131486	-11.3374	8.56339e-30	6.50817e-28	355	340	1158	1025	244.734	240.734	708.433	655.77	grapa	GRB2-related adaptor protein a
ENSDARG00000005463	716.916	-1.29568	0.0947526	-13.6744	1.44458e-42	1.69508e-40	737	815	2043	2210	508.081	577.054	1249.85	1413.9	slc30a1a	solute carrier family 30 (zinc transporter), member 1a
ENSDARG00000005464	230.221	-1.86881	0.188979	-9.88898	4.64759e-23	2.54497e-21	142	160	585	646	97.8935	113.287	357.887	413.295	dnase1l1	deoxyribonuclease I-like 1
ENSDARG00000005593	272.976	-1.39267	0.135959	-10.2433	1.26866e-24	7.65352e-23	313	344	964	963	215.779	243.566	589.749	616.104
ENSDARG00000005679	248.485	-1.2916	0.166438	-7.76025	8.47647e-15	2.61973e-13	174	168	476	459	119.954	118.951	291.204	293.657	trip10a	thyroid hormone receptor interactor 10a
ENSDARG00000005776	56.8549	-3.05025	0.278024	-10.9712	5.2599e-28	3.75687e-26	62	68	654	551	42.7422	48.1468	400.099	352.516	guk1b	guanylate kinase 1b
ENSDARG00000005800	10.0584	-2.39915	0.734	-3.2686	0.00108081	0.00622486	21	7	80	84	14.4772	4.95629	48.9418	53.7411	ampd3a	adenosine monophosphate deaminase 3a
ENSDARG00000005821	594.971	-1.08357	0.0930271	-11.6479	2.35135e-31	1.8878e-29	1034	1004	2491	2334	712.83	710.874	1523.93	1493.24	ncf2	neutrophil cytosolic factor 2
ENSDARG00000006029	917.21	-1.99129	0.100989	-19.7178	1.51566e-86	6.10725e-84	801	664	3505	3003	552.202	470.14	2144.26	1921.25	lta4h	leukotriene A4 hydrolase
ENSDARG00000006044	188.686	-1.2096	0.226784	-5.33369	9.62365e-08	1.33456e-06	151	97	396	246	104.098	68.6801	242.262	157.385	ust	uronyl-2-sulfotransferase
ENSDARG00000006052	85.9601	-1.14613	0.282872	-4.05175	5.0836e-05	0.000415322	87	73	249	148	59.977	51.6871	152.331	94.6868	malt2	MALT paracaspase 2
ENSDARG00000006206	8.70826	-2.38139	0.745334	-3.19507	0.00139797	0.00780322	8	3	37	27	5.51513	2.12413	22.6356	17.2739	pou4f3	POU class 4 homeobox 3
ENSDARG00000006220	39.3391	-1.54324	0.406354	-3.79776	0.000146008	0.0010756	33	25	134	56	22.7499	17.701	81.9775	35.8274	ugt1ab	UDP glucuronosyltransferase 1 family a, b
ENSDARG00000006292	42.8484	-2.22218	0.524315	-4.23825	2.25273e-05	0.000201198	9	5	41	32	6.20452	3.54021	25.0827	20.4728	maats1	MYCBP-associated, testis expressed 1
ENSDARG00000006353	174.479	-1.32283	0.198944	-6.64925	2.94585e-11	6.43926e-10	223	192	572	586	153.734	135.944	349.934	374.908	itga5	integrin, alpha 5 (fibronectin receptor, alpha polypeptide)
ENSDARG00000006456	117.627	-1.43796	0.239436	-6.00562	1.90603e-09	3.36685e-08	54	56	172	161	37.2271	39.6503	105.225	103.004	pdgfrl	platelet-derived growth factor receptor-like
ENSDARG00000006491	74.5263	-1.21982	0.314925	-3.87339	0.000107334	0.000815737	27	25	59	76	18.6136	17.701	36.0946	48.6229	agpat9l	1-acylglycerol-3-phosphate O-acyltransferase 9, like
ENSDARG00000006598	89.743	-1.4131	0.271219	-5.21019	1.8865e-07	2.49307e-06	45	54	160	135	31.0226	38.2343	97.8836	86.3697	sgk2b	serum/glucocorticoid regulated kinase 2b
ENSDARG00000006677	23.0506	-1.01991	0.440477	-2.31546	0.0205877	0.0733763	15	26	46	47	10.3409	18.4091	28.1415	30.0694	ripk1l	receptor (TNFRSF)-interacting serine-threonine kinase 1, like
ENSDARG00000006775	107.592	-1.02047	0.24773	-4.11926	3.80092e-05	0.00032173	158	163	409	320	108.924	115.411	250.215	204.728	cass4	Cas scaffolding protein family member 4
ENSDARG00000006791	440.819	1.15748	0.132458	8.73845	2.36323e-18	9.4335e-17	519	481	272	229	357.794	340.568	166.402	146.509	arntl1a	aryl hydrocarbon receptor nuclear translocator-like 1a
ENSDARG00000006863	59.0955	-1.34828	0.458819	-2.9386	0.00329703	0.0162388	12	7	28	26	8.27269	4.95629	17.1296	16.6342	si:ch1073-349o24.2	si:ch1073-349o24.2
ENSDARG00000006892	132.064	-1.45107	0.240983	-6.02148	1.72825e-09	3.06891e-08	54	48	146	165	37.2271	33.986	89.3188	105.563	myo3b	myosin IIIB
ENSDARG00000006923	331.707	1.29884	0.169287	7.6724	1.68807e-14	5.07753e-13	1977	1662	732	914	1362.93	1176.77	447.818	584.755	cacna1ab	calcium channel, voltage-dependent, P/Q type, alpha 1A subunit, b
ENSDARG00000007018	160.118	-1.59146	0.202764	-7.84883	4.19929e-15	1.33056e-13	151	179	548	563	104.098	126.739	335.251	360.194	ms4a17a.6	membrane-spanning 4-domains, subfamily A, member 17A.6
ENSDARG00000007097	34.9898	-2.34442	0.705668	-3.32227	0.000892873	0.00528644	3	4	31	9	2.06817	2.83217	18.965	5.75798	her13	hairy-related 13
ENSDARG00000007108	63.6324	1.29939	0.305998	4.24642	2.17213e-05	0.000194499	255	166	109	82	175.795	117.535	66.6832	52.4616	lipia	lipase, member Ia
ENSDARG00000007302	107.962	-1.43585	0.222066	-6.46589	1.00702e-10	2.05602e-09	77	79	227	244	53.0831	55.9353	138.872	156.105	sh3gl3b	SH3-domain GRB2-like 3b
ENSDARG00000007382	51.5498	-3.23546	0.345539	-9.36351	7.71281e-21	3.74352e-19	64	33	508	509	44.121	23.3654	310.781	325.646	ubtd1a	ubiquitin domain containing 1a
ENSDARG00000007467	34.2543	7.13105	1.50328	4.74368	2.09872e-06	2.29143e-05	12	34	0	0	8.27269	24.0734	0	0	ifit10	interferon-induced protein with tetratricopeptide repeats 10
ENSDARG00000007480	303.908	-1.57514	0.175181	-8.99153	2.43822e-19	1.06267e-17	78	70	272	221	53.7725	49.5629	166.402	141.39	rpe65a	retinal pigment epithelium-specific protein 65a
ENSDARG00000007534	47.7925	-3.15593	0.308226	-10.239	1.32599e-24	7.95444e-23	42	29	361	345	28.9544	20.5332	220.85	220.722	itln1	intelectin 1
ENSDARG00000007553	39.7814	-2.33087	0.500005	-4.66169	3.13628e-06	3.31899e-05	11	4	37	47	7.5833	2.83217	22.6356	30.0694	opn4.1	opsin 4.1
ENSDARG00000007682	840.085	-2.74765	0.0934601	-29.3991	5.63092e-190	2.00423e-186	773	768	5624	5925	532.899	543.776	3440.61	3790.67	ppdpfa	pancreatic progenitor cell differentiation and proliferation factor a
ENSDARG00000007709	254.975	-1.50596	0.425934	-3.53565	0.000406766	0.00264522	1	16	30	24	0.689391	11.3287	18.3532	15.3546	adamts8a	ADAM metallopeptidase with thrombospondin type 1 motif, 8a
ENSDARG00000007711	112.752	-1.47401	0.201737	-7.30656	2.7407e-13	7.32545e-12	82	85	257	261	56.5301	60.1836	157.226	166.981	rab3il1	RAB3A interacting protein (rabin3)-like 1
ENSDARG00000007769	23.2902	1.06191	0.40561	2.61804	0.00884352	0.0369016	113	101	46	68	77.9012	71.5122	28.1415	43.5047	sult5a1	sulfotransferase family 5A, member 1
ENSDARG00000007788	62.7485	-1.43968	0.307251	-4.68568	2.79028e-06	2.98543e-05	133	80	287	355	91.689	56.6433	175.579	227.12	atp2b1b	ATPase, Ca++ transporting, plasma membrane 1b
ENSDARG00000007990	23.1873	-1.77299	0.507282	-3.49508	0.000473919	0.00302301	20	17	68	73	13.7878	12.0367	41.6005	46.7036	wt1b	wilms tumor 1b
ENSDARG00000008165	123.101	-1.03161	0.211116	-4.88645	1.02672e-06	1.1865e-05	246	254	608	535	169.59	179.843	371.958	342.28	caspa	caspase a
ENSDARG00000008182	10.547	-1.77692	0.713906	-2.48902	0.0128097	0.0499843	3	11	33	21	2.06817	7.78846	20.1885	13.4353	si:ch73-111e15.1	si:ch73-111e15.1
ENSDARG00000008306	470.049	-3.05112	0.185847	-16.4174	1.43674e-60	3.00814e-58	40	47	428	378	27.5756	33.278	261.839	241.835	rdh5	retinol dehydrogenase 5 (11-cis/9-cis)
ENSDARG00000008403	21.3263	-1.25639	0.495242	-2.53692	0.0111834	0.0447839	25	38	74	94	17.2348	26.9056	45.2712	60.1389	phospho1	phosphatase, orphan 1
ENSDARG00000008548	57.5154	-1.08807	0.309341	-3.51737	0.000435848	0.00280445	54	61	133	140	37.2271	43.1905	81.3658	89.5686	arhgap12a	Rho GTPase activating protein 12a
ENSDARG00000008697	107.633	-1.44761	0.221547	-6.53411	6.39876e-11	1.34898e-09	160	167	571	428	110.303	118.243	349.322	273.824	epas1a	endothelial PAS domain protein 1a
ENSDARG00000008807	14.4419	-3.70206	0.620318	-5.968	2.40182e-09	4.1872e-08	7	11	156	107	4.82574	7.78846	95.4365	68.456	bokb	BCL2-related ovarian killer b
ENSDARG00000008816	622.854	-1.50295	0.115096	-13.0582	5.70409e-39	6.09083e-37	339	393	1188	1131	233.704	278.26	726.786	723.586	glud1a	glutamate dehydrogenase 1a
ENSDARG00000008840	247.269	-1.12033	0.204697	-5.47314	4.42141e-08	6.46737e-07	51	63	144	133	35.1589	44.6066	88.0953	85.0901	hmbsa	hydroxymethylbilane synthase a
ENSDARG00000009021	12.9047	-1.66104	0.654636	-2.53735	0.0111695	0.0447365	9	4	29	17	6.20452	2.83217	17.7414	10.8762	chrna1	cholinergic receptor, nicotinic, alpha 1 (muscle)
ENSDARG00000009040	170.967	-1.03495	0.218687	-4.73257	2.2169e-06	2.40692e-05	89	112	221	239	61.3558	79.3007	135.202	152.906	si:ch73-141c7.1	si:ch73-141c7.1
ENSDARG00000009087	17554.3	-1.31569	0.0629461	-20.9018	5.15269e-97	2.62002e-94	25810	24650	69515	70664	17793.2	17453.2	42527.4	45209.1	cd74a	CD74 molecule, major histocompatibility complex, class II invariant chain a
ENSDARG00000009123	112.384	-1.10608	0.21235	-5.20874	1.90128e-07	2.50796e-06	157	179	427	382	108.234	126.739	261.227	244.394	sele	selectin E
ENSDARG00000009160	47.6882	-1.14505	0.338162	-3.38611	0.000708908	0.0043253	37	35	96	82	25.5075	24.7815	58.7302	52.4616	kmo	kynurenine 3-monooxygenase
ENSDARG00000009196	4.7307	4.54895	1.65999	2.74036	0.00613727	0.027309	11	10	0	1	7.5833	7.08042	0	0.639775	anxa3a	annexin A3a
ENSDARG00000009266	152.21	-1.26686	0.183164	-6.91653	4.62825e-12	1.10684e-10	113	139	349	329	77.9012	98.4178	213.509	210.486	uevld	UEV and lactate/malate dehyrogenase domains
ENSDARG00000009387	859.843	-1.62143	0.196602	-8.24726	1.62073e-16	5.73052e-15	41	58	202	139	28.265	41.0664	123.578	88.9288	robo4	roundabout, axon guidance receptor, homolog 4 (Drosophila)
ENSDARG00000009390	475.784	-1.28123	0.114443	-11.1954	4.29447e-29	3.19556e-27	485	519	1401	1326	334.355	367.474	857.094	848.342	npl	N-acetylneuraminate pyruvate lyase (dihydrodipicolinate synthase)
ENSDARG00000009466	6.87793	-3.05575	1.04456	-2.9254	0.00344009	0.0168193	10	5	98	42	6.89391	3.54021	59.9537	26.8706	rgs9bp	regulator of G protein signaling 9 binding protein
ENSDARG00000009637	190.875	-2.55922	0.187527	-13.6472	2.0966e-42	2.44672e-40	272	273	1921	1671	187.514	193.295	1175.22	1069.06	rcvrn3	recoverin 3
ENSDARG00000009677	1811.31	1.08423	0.0769773	14.085	4.69445e-45	6.1506e-43	5704	5255	2973	2799	3932.29	3720.76	1818.8	1790.73	dlg1	discs, large homolog 1 (Drosophila)
ENSDARG00000009727	38.2779	-1.47262	0.346898	-4.2451	2.18499e-05	0.000195405	51	55	175	154	35.1589	38.9423	107.06	98.5254	twf2b	twinfilin actin-binding protein 2b
ENSDARG00000010083	1140.16	1.25514	0.086005	14.5938	3.07397e-48	4.49642e-46	3911	4105	1899	1853	2696.21	2906.51	1161.76	1185.5	rbfox3a	RNA binding protein, fox-1 homolog (C. elegans) 3a
ENSDARG00000010154	302.27	-1.32113	0.274823	-4.80721	1.53047e-06	1.71214e-05	24	24	71	63	16.5454	16.993	43.4359	40.3058	vstm4a	V-set and transmembrane domain containing 4a
ENSDARG00000010169	689.326	-1.32018	0.114572	-11.5227	1.01341e-30	7.92759e-29	305	277	807	815	210.264	196.128	493.701	521.417	myd88	myeloid differentiation primary response 88
ENSDARG00000010231	8.55923	-3.54907	0.75486	-4.70163	2.58088e-06	2.78228e-05	8	6	73	109	5.51513	4.24825	44.6594	69.7355	ppm1na	protein phosphatase, Mg2+/Mn2+ dependent, 1Na (putative)
ENSDARG00000010312	159.95	-1.83577	0.166814	-11.0049	3.6204e-28	2.62984e-26	262	267	1039	1069	180.62	189.047	635.632	683.92	cp	ceruloplasmin
ENSDARG00000010317	213.619	-1.70276	0.147138	-11.5726	5.67649e-31	4.47333e-29	261	279	999	965	179.931	197.544	611.161	617.383	gpr183a	G protein-coupled receptor 183a
ENSDARG00000010385	26.8668	-3.22859	0.540143	-5.97729	2.26882e-09	3.96831e-08	8	12	141	70	5.51513	8.4965	86.26	44.7843	sept4a	septin 4a
ENSDARG00000010454	58.6644	-4.51105	0.34195	-13.1921	9.73797e-40	1.07198e-37	20	39	766	740	13.7878	27.6136	468.618	473.434	guca1a	guanylate cyclase activator 1A
ENSDARG00000010482	36.6705	-1.59145	0.421928	-3.77186	0.000162033	0.0011774	48	52	153	183	33.0908	36.8182	93.6012	117.079	prg4a	proteoglycan 4a
ENSDARG00000010555	45.5286	-1.00193	0.386553	-2.59197	0.00954272	0.039297	61	57	112	151	42.0528	40.3584	68.5185	96.6061	pdha1b	pyruvate dehydrogenase (lipoamide) alpha 1b
ENSDARG00000010680	106.423	-3.22291	0.229818	-14.0237	1.11567e-44	1.43532e-42	90	88	918	937	62.0452	62.3077	561.607	599.47	gngt2a	guanine nucleotide binding protein (G protein), gamma transducing activity polypeptide 2a
ENSDARG00000010729	1775.79	1.27571	0.106402	11.9896	4.03037e-33	3.51317e-31	1063	933	496	425	732.823	660.603	303.439	271.905	LOC795887	interferon-induced protein 44
ENSDARG00000010752	1116.12	-1.88673	0.0890092	-21.197	1.01743e-99	6.03559e-97	938	906	3917	3700	646.649	641.486	2396.31	2367.17	acsl4b	acyl-CoA synthetase long-chain family member 4b
ENSDARG00000010936	94.2561	-1.53339	0.232492	-6.59545	4.23966e-11	9.12723e-10	136	107	405	380	93.7572	75.7605	247.768	243.115	abcb4	ATP-binding cassette, sub-family B (MDR/TAP), member 4
ENSDARG00000010958	43.2451	-2.66459	0.332994	-8.00193	1.22482e-15	4.07434e-14	69	42	440	346	47.568	29.7378	269.18	221.362	glmnb	glomulin, FKBP associated protein b
ENSDARG00000011571	9.75205	-2.02972	0.681179	-2.97972	0.00288508	0.0145144	9	13	64	37	6.20452	9.20454	39.1535	23.6717	calcrlb	calcitonin receptor-like b
ENSDARG00000011573	14.3781	-1.28244	0.572526	-2.23997	0.025093	0.0858416	12	24	47	51	8.27269	16.993	28.7533	32.6285	abcb11a	ATP-binding cassette, sub-family B (MDR/TAP), member 11a
ENSDARG00000011618	15.1414	-1.75311	0.652909	-2.68507	0.00725142	0.0312978	13	4	39	25	8.96208	2.83217	23.8591	15.9944	slc26a2	solute carrier family 26 (anion exchanger), member 2
ENSDARG00000011671	18.5897	-2.23153	0.521531	-4.27881	1.87892e-05	0.000170099	13	12	64	67	8.96208	8.4965	39.1535	42.8649	pde6b	phosphodiesterase 6B, cGMP-specific, rod, beta
ENSDARG00000011862	502.593	-1.61856	0.134754	-12.0112	3.10123e-33	2.71434e-31	854	815	3056	2673	588.74	577.054	1869.58	1710.12	inaa	internexin neuronal intermediate filament protein, alpha a
ENSDARG00000011884	22.7057	-1.19155	0.488559	-2.43892	0.0147314	0.0559993	30	51	75	131	20.6817	36.1101	45.883	83.8106	mfn1a	mitofusin 1a
ENSDARG00000011989	36.0588	-2.44101	0.404794	-6.03025	1.63707e-09	2.92319e-08	55	53	311	343	37.9165	37.5262	190.261	219.443	crx	cone-rod homeobox
ENSDARG00000012060	11.6867	-1.57635	0.606817	-2.59773	0.00938412	0.0387335	20	26	117	38	13.7878	18.4091	71.5774	24.3115	thbs3b	thrombospondin 3b
ENSDARG00000012071	113.589	-1.33001	0.251706	-5.28398	1.2641e-07	1.72941e-06	80	56	212	170	55.1513	39.6503	129.696	108.762	angptl1a	angiopoietin-like 1a
ENSDARG00000012125	8.65016	-3.15337	0.713246	-4.42116	9.81744e-06	9.45272e-05	10	10	107	92	6.89391	7.08042	65.4597	58.8593	cnga1	cyclic nucleotide gated channel alpha 1
ENSDARG00000012126	23.1812	-2.23333	0.512817	-4.35503	1.33052e-05	0.000124899	22	46	219	141	15.1666	32.5699	133.978	90.2083	zgc:109965	zgc:109965
ENSDARG00000012405	85.4953	-3.06826	0.350545	-8.75282	2.08087e-18	8.32194e-17	48	40	329	491	33.0908	28.3217	201.273	314.13	col1a1a	collagen, type I, alpha 1a
ENSDARG00000012422	13.7274	-1.25773	0.542963	-2.31642	0.0205355	0.0732269	30	15	66	54	20.6817	10.6206	40.377	34.5479	col11a2	collagen, type XI, alpha 2
ENSDARG00000012450	3698.05	-1.48182	0.0775634	-19.1047	2.30799e-81	8.35414e-79	5106	5047	16236	15442	3520.03	3573.49	9932.74	9879.41	vmp1	vacuole membrane protein 1
ENSDARG00000012504	67.482	-3.0014	0.316189	-9.49242	2.25732e-21	1.13429e-19	69	51	502	568	47.568	36.1101	307.11	363.392	rlbp1a	retinaldehyde binding protein 1a
ENSDARG00000012506	136.381	-1.13552	0.247093	-4.5955	4.31708e-06	4.44102e-05	49	55	120	135	33.7802	38.9423	73.4127	86.3697	rnpep	arginyl aminopeptidase (aminopeptidase B)
ENSDARG00000012581	8.7098	-2.71063	0.849635	-3.19035	0.00142101	0.00791113	4	2	28	16	2.75756	1.41608	17.1296	10.2364
ENSDARG00000012610	302.689	-3.37027	0.139569	-24.1477	7.88715e-129	9.90812e-126	319	309	3729	3525	219.916	218.785	2281.3	2255.21	saga	S-antigen; retina and pineal gland (arrestin) a
ENSDARG00000012789	33.383	-1.23033	0.463532	-2.65424	0.00794868	0.0337479	38	45	93	124	26.1969	31.8619	56.8949	79.3321	plek2	pleckstrin 2
ENSDARG00000012945	37.9914	-1.40168	0.416501	-3.36538	0.000764395	0.00462317	36	52	128	132	24.8181	36.8182	78.3069	84.4503	tnfsf13b	tumor necrosis factor (ligand) superfamily, member 13b
ENSDARG00000012968	126.403	-1.88341	0.240125	-7.84345	4.3835e-15	1.38278e-13	65	67	249	294	44.8104	47.4388	152.331	188.094	rhoub	ras homolog family member Ub
ENSDARG00000012981	26.0774	-1.87668	0.475055	-3.95045	7.80053e-05	0.000613358	21	39	130	117	14.4772	27.6136	79.5305	74.8537	osbpl7	oxysterol binding protein-like 7
ENSDARG00000013050	22.9167	-1.71321	0.454266	-3.77139	0.00016234	0.00117923	31	24	123	79	21.3711	16.993	75.248	50.5423	abcc12	ATP-binding cassette, sub-family C (CFTR/MRP), member 12
ENSDARG00000013082	330.686	-1.29288	0.158343	-8.16504	3.21325e-16	1.10325e-14	197	268	666	609	135.81	189.755	407.441	389.623	uap1l1	UDP-N-acetylglucosamine pyrophosphorylase 1, like 1
ENSDARG00000013134	9.17238	-2.61281	0.692711	-3.77186	0.000162033	0.0011774	8	21	101	98	5.51513	14.8689	61.789	62.698	zmp:0000000545	zmp:0000000545
ENSDARG00000013174	41.543	-1.12588	0.387917	-2.90238	0.00370335	0.0179299	44	21	81	77	30.3332	14.8689	49.5536	49.2627	nkd3	naked cuticle-like protein 3
ENSDARG00000013252	81.5295	-1.53456	0.299791	-5.11876	3.07548e-07	3.8825e-06	54	34	137	147	37.2271	24.0734	83.8129	94.047	si:dkey-202l16.5	si:dkey-202l16.5
ENSDARG00000013441	302.782	-1.10866	0.189462	-5.8516	4.86864e-09	8.03513e-08	80	61	156	183	55.1513	43.1905	95.4365	117.079	hey2	hes-related family bHLH transcription factor with YRPW motif 2
ENSDARG00000013472	175.405	-1.16919	0.209915	-5.56982	2.54996e-08	3.84583e-07	82	85	197	222	56.5301	60.1836	120.519	142.03	nedd1	neural precursor cell expressed, developmentally down-regulated 1
ENSDARG00000013653	48.0434	-1.83479	0.376513	-4.87313	1.09844e-06	1.26256e-05	104	72	360	340	71.6967	50.979	220.238	217.524	adgrl4	adhesion G protein-coupled receptor L4
ENSDARG00000013711	1447.09	-1.38094	0.0687624	-20.0828	1.04367e-89	4.45773e-87	1655	1593	4841	4607	1140.94	1127.91	2961.59	2947.45	si:rp71-61h23.4	si:rp71-61h23.4
ENSDARG00000013771	246.637	-1.28093	0.15204	-8.42495	3.60916e-17	1.33583e-15	315	237	729	766	217.158	167.806	445.982	490.068	ctss2.2	cathepsin S, ortholog 2, tandem duplicate 2
ENSDARG00000013777	64.2986	-1.20274	0.307186	-3.91536	9.02697e-05	0.000699787	53	69	186	129	36.5377	48.8549	113.79	82.531	ppp1r13l	protein phosphatase 1, regulatory subunit 13 like
ENSDARG00000013834	28.8021	-1.34912	0.387921	-3.47784	0.000505479	0.00320802	38	39	108	111	26.1969	27.6136	66.0715	71.0151	arhgef3	Rho guanine nucleotide exchange factor (GEF) 3
ENSDARG00000013926	854.79	-2.15441	0.119703	-17.998	2.01872e-72	5.82593e-70	157	138	798	670	108.234	97.7098	488.195	428.649	slc16a9a	solute carrier family 16, member 9a
ENSDARG00000013935	98.6176	-1.13749	0.258931	-4.39302	1.11787e-05	0.00010653	149	151	419	320	102.719	106.914	256.333	204.728	tmem196	transmembrane protein 196
ENSDARG00000014003	107.52	-1.10585	0.206318	-5.35994	8.32503e-08	1.1689e-06	99	116	287	231	68.2497	82.1328	175.579	147.788	stard8	StAR-related lipid transfer (START) domain containing 8
ENSDARG00000014024	44.1492	1.0212	0.336127	3.03815	0.00238036	0.0123476	95	60	39	46	65.4921	42.4825	23.8591	29.4297	ms4a17a.4	membrane-spanning 4-domains, subfamily A, member 17A.4
ENSDARG00000014031	72.4026	-2.20888	0.617415	-3.57762	0.000346737	0.00230038	122	72	495	503	84.1057	50.979	302.827	321.807	abcc2	ATP-binding cassette, sub-family C (CFTR/MRP), member 2
ENSDARG00000014098	24.7254	1.74861	0.593004	2.94874	0.00319077	0.0157882	16	23	8	5	11.0303	16.285	4.89418	3.19888	pkd2	polycystic kidney disease 2
ENSDARG00000014169	73.1482	1.01911	0.270377	3.76922	0.000163759	0.00118792	221	212	104	134	152.355	150.105	63.6244	85.7299
ENSDARG00000014321	44.139	1.34068	0.393788	3.40457	0.000662671	0.00407369	101	107	54	38	69.6285	75.7605	33.0357	24.3115	eng1a	engrailed homeobox 1a
ENSDARG00000014685	109.292	-1.64625	0.254208	-6.47598	9.4196e-11	1.93987e-09	58	56	188	210	39.9847	39.6503	115.013	134.353	esco2	establishment of sister chromatid cohesion N-acetyltransferase 2
ENSDARG00000014929	19.9838	-1.37182	0.468726	-2.9267	0.00342576	0.0167531	22	33	100	60	15.1666	23.3654	61.1773	38.3865	p2ry11	purinergic receptor P2Y, G-protein coupled, 11
ENSDARG00000014946	10.0493	-1.93341	0.660155	-2.92873	0.00340355	0.0166711	8	10	43	34	5.51513	7.08042	26.3062	21.7524	angpt2a	angiopoietin 2a
ENSDARG00000014954	165.375	-1.65951	0.221724	-7.48459	7.17698e-14	2.03548e-12	126	135	513	410	86.8633	95.5856	313.839	262.308	snx33	sorting nexin 33
ENSDARG00000015134	16.5484	-2.5413	0.586999	-4.32932	1.49574e-05	0.000138882	8	33	132	136	5.51513	23.3654	80.754	87.0094	camkk1b	calcium/calmodulin-dependent protein kinase kinase 1, alpha b
ENSDARG00000015156	11.3685	-1.49657	0.608015	-2.4614	0.0138397	0.0532061	15	11	46	36	10.3409	7.78846	28.1415	23.0319	fbln2	fibulin 2
ENSDARG00000015176	25.0043	-1.45371	0.458836	-3.16825	0.00153359	0.00844107	22	14	57	53	15.1666	9.91259	34.871	33.9081	ror1	receptor tyrosine kinase-like orphan receptor 1
ENSDARG00000015224	466.561	-1.10219	0.104565	-10.5407	5.60639e-26	3.63921e-24	472	406	1041	1062	325.393	287.465	636.855	679.441	cd2ap	CD2-associated protein
ENSDARG00000015273	10.669	-2.10629	0.635511	-3.31432	0.000918663	0.00541073	17	10	52	77	11.7196	7.08042	31.8122	49.2627	alpi.1	alkaline phosphatase, intestinal, tandem duplicate 1
ENSDARG00000015278	205.669	-1.34608	0.175688	-7.66179	1.83359e-14	5.47665e-13	213	174	588	511	146.84	123.199	359.722	326.925	plxnc1	plexin C1
ENSDARG00000015349	10073.1	-1.74373	0.0855066	-20.3929	1.93303e-92	9.17372e-90	329	354	1292	1263	226.81	250.647	790.41	808.036	mfge8a	milk fat globule-EGF factor 8 protein a
ENSDARG00000015355	4069.8	-1.04712	0.0598252	-17.503	1.35935e-68	3.45599e-66	3075	2913	7056	6762	2119.88	2062.53	4316.67	4326.16	fosl1a	FOS-like antigen 1a
ENSDARG00000015404	105.028	-2.72598	0.211795	-12.8709	6.56526e-38	6.74076e-36	150	124	1053	971	103.409	87.7972	644.197	621.222	arl3l2	ADP-ribosylation factor-like 3, like 2
ENSDARG00000015495	71.4583	-1.19533	0.232199	-5.14785	2.63496e-07	3.37161e-06	117	105	274	293	80.6587	74.3444	167.626	187.454	klf3	Kruppel-like factor 3 (basic)
ENSDARG00000015546	196.941	-1.07813	0.186176	-5.79093	6.99963e-09	1.1359e-07	187	206	519	410	128.916	145.857	317.51	262.308	alpl	alkaline phosphatase, liver/bone/kidney
ENSDARG00000015557	231.374	-1.10625	0.162791	-6.79551	1.07933e-11	2.47319e-10	213	142	455	398	146.84	100.542	278.357	254.631	zgc:100829	zgc:100829
ENSDARG00000015793	39.8404	-1.0385	0.368873	-2.81532	0.00487283	0.0225834	55	35	103	103	37.9165	24.7815	63.0126	65.8969	creb3l1	cAMP responsive element binding protein 3-like 1
ENSDARG00000015805	241.674	-1.88464	0.223226	-8.44274	3.09975e-17	1.15127e-15	62	42	202	226	42.7422	29.7378	123.578	144.589	cgnl1	cingulin-like 1
ENSDARG00000015902	225.188	-1.07979	0.165927	-6.50764	7.63385e-11	1.59207e-09	193	171	467	393	133.052	121.075	285.698	251.432	stat6	signal transducer and activator of transcription 6, interleukin-4 induced
ENSDARG00000015946	21.7453	-1.76849	0.539492	-3.27807	0.00104518	0.00604739	8	8	35	26	5.51513	5.66433	21.412	16.6342	slc44a1a	solute carrier family 44 (choline transporter), member 1a
ENSDARG00000015947	217.218	-1.25785	0.172454	-7.29381	3.01315e-13	8.01354e-12	380	272	972	770	261.969	192.587	594.643	492.627	matn4	matrilin 4
ENSDARG00000015955	5.85805	-2.48667	0.956225	-2.60051	0.00930852	0.0384747	8	4	16	58	5.51513	2.83217	9.78836	37.107	cldnc	claudin c
ENSDARG00000015964	23.7319	-2.34603	0.425666	-5.51144	3.55908e-08	5.28198e-07	26	34	195	147	17.9242	24.0734	119.296	94.047	zgc:153311	zgc:153311
ENSDARG00000016065	38.1324	-1.38113	0.385016	-3.5872	0.000334243	0.00223114	48	38	155	96	33.0908	26.9056	94.8248	61.4184	tlr3	toll-like receptor 3
ENSDARG00000016161	28.5911	-1.85276	0.545283	-3.3978	0.000679296	0.0041651	3	15	41	32	2.06817	10.6206	25.0827	20.4728	ccdc170	coiled-coil domain containing 170
ENSDARG00000016213	33.2515	-1.30717	0.360077	-3.63026	0.00028314	0.00192265	49	32	128	96	33.7802	22.6573	78.3069	61.4184	zmp:0000001048	zmp:0000001048
ENSDARG00000016470	166.676	-1.4709	0.216029	-6.80884	9.83887e-12	2.26421e-10	67	71	207	220	46.1892	50.271	126.637	140.751	anxa5b	annexin A5b
ENSDARG00000016480	149.404	1.20966	0.191648	6.31189	2.75648e-10	5.40067e-09	645	702	389	264	444.657	497.045	237.98	168.901	slc17a7a	solute carrier family 17 (vesicular glutamate transporter), member 7a
ENSDARG00000016494	139.319	-1.74725	0.189939	-9.19901	3.61266e-20	1.66635e-18	300	296	1046	1185	206.817	209.58	639.914	758.134	ddc	dopa decarboxylase
ENSDARG00000016528	50.2274	-1.15671	0.363635	-3.18096	0.00146789	0.00814031	25	18	55	52	17.2348	12.7448	33.6475	33.2683	wdcp	WD repeat and coiled coil containing
ENSDARG00000016607	183.32	-1.47237	0.192632	-7.64345	2.11479e-14	6.28141e-13	130	127	366	429	89.6208	89.9213	223.909	274.464	echdc2	enoyl CoA hydratase domain containing 2
ENSDARG00000016695	18.5343	2.06171	0.547602	3.76498	0.00016656	0.00120537	50	40	10	14	34.4695	28.3217	6.11773	8.95686	p2rx1	purinergic receptor P2X, ligand-gated ion channel, 1
ENSDARG00000016749	122.077	-1.30363	0.197297	-6.60743	3.91056e-11	8.46138e-10	237	189	566	606	163.386	133.82	346.263	387.704	slco1c1	solute carrier organic anion transporter family, member 1C1
ENSDARG00000016854	319.069	1.07698	0.135623	7.94094	2.00647e-15	6.5221e-14	1174	1040	584	587	809.345	736.363	357.275	375.548	neurod2	neurogenic differentiation 2
ENSDARG00000016886	45.5483	-1.01608	0.336138	-3.0228	0.00250446	0.0128973	40	35	76	93	27.5756	24.7815	46.4947	59.4991	dnajb9b	DnaJ (Hsp40) homolog, subfamily B, member 9b
ENSDARG00000016963	49.5627	-1.52699	0.337486	-4.52462	6.05039e-06	6.05777e-05	115	57	289	263	79.28	40.3584	176.802	168.261	slc16a1a	solute carrier family 16 (monocarboxylate transporter), member 1a
ENSDARG00000016999	27.4066	-1.47052	0.424009	-3.46813	0.000524102	0.00331048	26	32	73	106	17.9242	22.6573	44.6594	67.8162	lin28a	lin-28 homolog A (C. elegans)
ENSDARG00000017036	33.8031	-1.16636	0.379634	-3.07232	0.00212403	0.0112502	34	27	84	69	23.4393	19.1171	51.3889	44.1445	si:dkeyp-57f11.2	si:dkeyp-57f11.2
ENSDARG00000017128	18.4617	-2.06546	0.529318	-3.90212	9.53548e-05	0.000734631	18	15	100	55	12.409	10.6206	61.1773	35.1876	myofl	myoferlin like
ENSDARG00000017229	594.877	-1.34565	0.206887	-6.50427	7.80694e-11	1.625e-09	30	69	125	156	20.6817	48.8549	76.4716	99.805	megf10	multiple EGF-like-domains 10
ENSDARG00000017299	4832.77	-1.17732	0.0626938	-18.7789	1.12392e-78	3.80991e-76	10159	9955	25113	25660	7003.52	7048.56	15363.4	16416.6	fabp11a	fatty acid binding protein 11a
ENSDARG00000017321	35.4052	-1.25043	0.38951	-3.21027	0.00132609	0.00745653	79	65	188	194	54.4619	46.0227	115.013	124.116	kdr	kinase insert domain receptor (a type III receptor tyrosine kinase)
ENSDARG00000017425	35.9703	-1.55567	0.637174	-2.44152	0.0146257	0.0556681	5	5	24	9	3.44695	3.54021	14.6825	5.75798	crocc2	ciliary rootlet coiled-coil, rootletin family member 2
ENSDARG00000017504	159.578	-1.29538	0.21766	-5.95138	2.65884e-09	4.60148e-08	153	153	481	360	105.477	108.33	294.263	230.319	si:ch211-1o7.3	si:ch211-1o7.3
ENSDARG00000017579	48.2758	-2.79363	0.307707	-9.07886	1.09721e-19	4.88166e-18	35	46	321	307	24.1287	32.5699	196.379	196.411	si:ch211-195b15.7	si:ch211-195b15.7
ENSDARG00000017615	93.1127	1.22095	0.244476	4.99416	5.90925e-07	7.12764e-06	395	418	206	184	272.309	295.961	126.025	117.719	tlx3b	T-cell leukemia, homeobox 3b
ENSDARG00000017634	49.2173	-3.96249	0.331416	-11.9562	6.02333e-33	5.18687e-31	26	31	504	489	17.9242	21.9493	308.333	312.85	pdcb	phosducin b
ENSDARG00000017676	1418.84	-1.0391	0.0989973	-10.4963	8.98716e-26	5.72925e-24	374	377	884	840	257.832	266.932	540.807	537.411	mmp2	matrix metallopeptidase 2
ENSDARG00000017773	40.6595	2.33222	0.859364	2.71389	0.00664981	0.0291648	7	11	3	1	4.82574	7.78846	1.83532	0.639775	slc16a12a	solute carrier family 16, member 12a
ENSDARG00000017780	87.338	1.62843	0.267243	6.09344	1.10507e-09	2.03432e-08	271	188	68	97	186.825	133.112	41.6005	62.0582	rorcb	RAR-related orphan receptor C b
ENSDARG00000017811	251.673	-1.04672	0.201021	-5.20702	1.91902e-07	2.52823e-06	53	71	133	153	36.5377	50.271	81.3658	97.8856	si:ch211-210c8.6	si:ch211-210c8.6
ENSDARG00000017917	3.89496	4.14941	1.84411	2.25009	0.0244433	0.0842005	11	5	0	1	7.5833	3.54021	0	0.639775	her7	hairy and enhancer of split related-7
ENSDARG00000017983	27.4073	-1.60168	0.571832	-2.80096	0.00509511	0.0234608	10	5	34	17	6.89391	3.54021	20.8003	10.8762	rsph14	radial spoke head 14 homolog (Chlamydomonas)
ENSDARG00000017988	166.541	-1.09646	0.183745	-5.96729	2.41222e-09	4.20191e-08	149	148	380	330	102.719	104.79	232.474	211.126	dse	dermatan sulfate epimerase
ENSDARG00000018179	141.246	-1.77585	0.169267	-10.4915	9.45624e-26	6.01034e-24	150	146	575	557	103.409	103.374	351.769	356.355	acvrl1	activin A receptor type II-like 1
ENSDARG00000018263	11.8065	-1.94653	0.770607	-2.52596	0.0115381	0.0458689	25	5	59	69	17.2348	3.54021	36.0946	44.1445	pdia2	protein disulfide isomerase family A, member 2
ENSDARG00000018283	1208.41	-1.36608	0.0913744	-14.9504	1.54909e-50	2.41477e-48	1151	1091	3150	3298	793.489	772.474	1927.08	2109.98	cyba	cytochrome b-245, alpha polypeptide
ENSDARG00000018303	475.681	-1.36378	0.109958	-12.4028	2.52434e-35	2.42837e-33	463	433	1287	1287	319.188	306.582	787.351	823.391	etv4	ets variant 4
ENSDARG00000018321	4.33466	4.78417	1.76604	2.70898	0.00674905	0.0294991	0	9	0	0	0	6.37238	0	0	lbx1a	ladybird homeobox 1a
ENSDARG00000018404	1504.02	-1.48146	0.0792519	-18.6931	5.63591e-78	1.8517e-75	899	982	2986	2883	619.762	695.297	1826.75	1844.47	krt18	keratin 18
ENSDARG00000018516	36.1699	-1.30905	0.509737	-2.56809	0.010226	0.0416293	13	9	37	24	8.96208	6.37238	22.6356	15.3546	stk38b	serine/threonine kinase 38b
ENSDARG00000018688	339.468	-1.11456	0.134933	-8.26008	1.45581e-16	5.16449e-15	385	315	850	841	265.416	223.033	520.007	538.051	elk3	ELK3, ETS-domain protein
ENSDARG00000018923	596.032	1.36928	0.0932682	14.6811	8.51995e-49	1.27239e-46	2598	2609	1133	1118	1791.04	1847.28	693.138	715.269	fat2	FAT atypical cadherin 2
ENSDARG00000019353	2573.64	-1.25815	0.0916802	-13.7233	7.36699e-43	8.74052e-41	460	373	1135	1089	317.12	264.1	694.362	696.715	sparc	secreted protein, acidic, cysteine-rich (osteonectin)
ENSDARG00000019371	79.9113	-2.0198	0.22722	-8.88917	6.15644e-19	2.59323e-17	139	138	647	608	95.8253	97.7098	395.817	388.983	flt1	fms-related tyrosine kinase 1 (vascular endothelial growth factor/vascular permeability factor receptor)
ENSDARG00000019507	295.91	-1.02562	0.187261	-5.47695	4.32722e-08	6.34172e-07	106	78	247	172	73.0754	55.2273	151.108	110.041	mcm5	minichromosome maintenance complex component 5
ENSDARG00000019713	65.1409	-2.04578	0.270406	-7.5656	3.86077e-14	1.1233e-12	72	69	327	323	49.6361	48.8549	200.05	206.647	oatx	organic anion transporter X
ENSDARG00000019742	12.0833	1.36815	0.608235	2.24938	0.0244882	0.0842864	33	32	10	18	22.7499	22.6573	6.11773	11.516	tlr4ba	toll-like receptor 4b, duplicate a
ENSDARG00000019815	59.2575	-1.77544	0.290034	-6.12147	9.27166e-10	1.7188e-08	35	40	149	138	24.1287	28.3217	91.1541	88.289	fn1a	fibronectin 1a
ENSDARG00000019861	383.093	-1.29507	0.120397	-10.7566	5.51593e-27	3.69273e-25	433	440	1297	1099	298.506	311.538	793.469	703.113	fgl2a	fibrinogen-like 2a
ENSDARG00000019902	84.4796	-1.76785	0.282217	-6.26416	3.74845e-10	7.17954e-09	115	173	560	538	79.28	122.491	342.593	344.199	rcvrn2	recoverin 2
ENSDARG00000020007	261.726	-2.52682	0.154393	-16.3662	3.33296e-60	6.91055e-58	258	253	1503	1779	177.863	179.135	919.494	1138.16	col1a2	collagen, type I, alpha 2
ENSDARG00000020031	73.9512	-1.34634	0.312879	-4.30308	1.68438e-05	0.000154517	75	111	311	220	51.7043	78.5926	190.261	140.751	cldn11a	claudin 11a
ENSDARG00000020054	558.313	-1.16105	0.27718	-4.18879	2.80444e-05	0.000244057	24	24	69	51	16.5454	16.993	42.2123	32.6285	aox6	aldehyde oxidase 6
ENSDARG00000020136	55.7564	-1.53554	0.289086	-5.3117	1.08605e-07	1.49733e-06	71	64	198	238	48.9468	45.3147	121.131	152.267	ptges	prostaglandin E synthase
ENSDARG00000020158	201.247	-1.51001	0.239331	-6.30928	2.80339e-10	5.48755e-09	30	46	125	117	20.6817	32.5699	76.4716	74.8537	spag6	sperm associated antigen 6
ENSDARG00000020387	553.47	-1.34499	0.154413	-8.71034	3.02955e-18	1.19813e-16	81	87	257	220	55.8407	61.5996	157.226	140.751	nipsnap3a	nipsnap homolog 3A (C. elegans)
ENSDARG00000020395	43.2957	-1.2755	0.338311	-3.77021	0.000163111	0.00118402	34	50	130	98	23.4393	35.4021	79.5305	62.698	mical2b	microtubule associated monoxygenase, calponin and LIM domain containing 2b
ENSDARG00000020581	34.4483	-2.18893	0.353962	-6.1841	6.2459e-10	1.16802e-08	24	29	135	135	16.5454	20.5332	82.5893	86.3697	otofb	otoferlin b
ENSDARG00000020602	117.758	-3.35236	0.250998	-13.3561	1.09136e-40	1.23318e-38	128	85	1256	1170	88.242	60.1836	768.387	748.537	grk7a	G protein-coupled receptor kinase 7a
ENSDARG00000020655	15.2992	1.66023	0.555522	2.98859	0.00280265	0.0141933	47	41	13	18	32.4014	29.0297	7.95305	11.516	insm2	INSM transcriptional repressor 2
ENSDARG00000020794	132.417	1.14639	0.190112	6.03005	1.6391e-09	2.92436e-08	297	338	175	146	204.749	239.318	107.06	93.4072	neurod6b	neuronal differentiation 6b
ENSDARG00000020814	16.6426	-2.71151	0.560813	-4.83497	1.33164e-06	1.50628e-05	21	27	188	164	14.4772	19.1171	115.013	104.923	faimb	Fas apoptotic inhibitory molecule b
ENSDARG00000020901	37.51	1.19061	0.32669	3.64445	0.000267959	0.00183356	125	141	58	72	86.1739	99.8339	35.4828	46.0638	gabrp	gamma-aminobutyric acid (GABA) A receptor, pi
ENSDARG00000020956	22.5041	-1.37118	0.461061	-2.97397	0.0029397	0.0147441	15	14	50	34	10.3409	9.91259	30.5886	21.7524	pck2	phosphoenolpyruvate carboxykinase 2 (mitochondrial)
ENSDARG00000020984	77.2496	-1.45259	0.277201	-5.24021	1.60396e-07	2.15164e-06	138	101	310	417	95.136	71.5122	189.65	266.786	slc16a10	solute carrier family 16 (aromatic amino acid transporter), member 10
ENSDARG00000021195	493.334	-1.18654	0.156477	-7.58284	3.38076e-14	9.89033e-13	127	76	283	233	87.5527	53.8112	173.132	149.068	st8sia6	ST8 alpha-N-acetyl-neuraminide alpha-2,8-sialyltransferase 6
ENSDARG00000021345	11.2926	-3.7822	0.792761	-4.77092	1.8339e-06	2.02089e-05	3	7	101	54	2.06817	4.95629	61.789	34.5479	prph2l	peripherin 2, like
ENSDARG00000021443	12124.7	-1.3118	0.0529342	-24.7818	1.40978e-135	2.00715e-132	3963	3744	11309	10073	2732.06	2650.91	6918.54	6444.46	zfp36l1b	zinc finger protein 36, C3H type-like 1b
ENSDARG00000021521	111.863	-1.39355	0.214631	-6.49279	8.42598e-11	1.74704e-09	168	145	522	398	115.818	102.666	319.345	254.631	rgs14a	regulator of G-protein signaling 14a
ENSDARG00000021866	34.3181	1.22158	0.438275	2.78725	0.00531577	0.0242831	65	74	46	21	44.8104	52.3951	28.1415	13.4353	upk1a	uroplakin 1a
ENSDARG00000021895	137.211	-1.02676	0.200033	-5.13296	2.8522e-07	3.62137e-06	201	142	442	339	138.568	100.542	270.404	216.884	disc1	disrupted in schizophrenia 1
ENSDARG00000021938	345.999	-1.266	0.132285	-9.57026	1.0664e-21	5.46139e-20	154	159	434	407	106.166	112.579	265.509	260.389	smad9	SMAD family member 9
ENSDARG00000021987	471.771	-1.08958	0.151252	-7.20373	5.85874e-13	1.52585e-11	576	553	1461	1226	397.089	391.547	893.8	784.365	si:ch211-165e15.1	si:ch211-165e15.1
ENSDARG00000022007	15.2987	-1.90336	0.645807	-2.94726	0.00320602	0.0158527	3	11	39	20	2.06817	7.78846	23.8591	12.7955	zgc:66426	zgc:66426
ENSDARG00000022309	99.5473	-1.2574	0.265702	-4.73236	2.21926e-06	2.40826e-05	54	58	148	151	37.2271	41.0664	90.5424	96.6061	dspa	desmoplakin a
ENSDARG00000022466	430.644	-1.22213	0.118846	-10.2833	8.38162e-25	5.14362e-23	406	441	1206	1005	279.893	312.246	737.798	642.974	clcn5b	chloride channel, voltage-sensitive 5b
ENSDARG00000022615	78.2678	-2.96805	0.287172	-10.3355	4.8709e-25	3.03274e-23	42	23	285	282	28.9544	16.285	174.355	180.417	si:ch211-241e1.3	si:ch211-241e1.3
ENSDARG00000022772	407.63	-1.25513	0.106179	-11.8209	3.04265e-32	2.53824e-30	510	489	1304	1357	351.589	346.232	797.752	868.175	si:ch211-106a19.1	si:ch211-106a19.1
ENSDARG00000022807	119.321	-1.37094	0.217498	-6.30322	2.91524e-10	5.65466e-09	115	91	288	306	79.28	64.4318	176.191	195.771	zgc:101640	zgc:101640
ENSDARG00000023026	96.4481	-1.55988	0.261894	-5.95613	2.58285e-09	4.47722e-08	52	50	146	189	35.8483	35.4021	89.3188	120.918	pkp2	plakophilin 2
ENSDARG00000023062	3285.1	-1.02503	0.143854	-7.1255	1.037e-12	2.63259e-11	845	729	1680	1889	582.535	516.162	1027.78	1208.54	cyr61	cysteine-rich, angiogenic inducer, 61
ENSDARG00000023082	5.43681	-1.95859	0.848167	-2.3092	0.0209324	0.074431	6	10	45	25	4.13635	7.08042	27.5298	15.9944	krt1-19d	keratin, type 1, gene 19d
ENSDARG00000023188	1264	-1.15172	0.081441	-14.1418	2.0981e-45	2.81805e-43	1767	1683	4317	4241	1218.15	1191.63	2641.02	2713.29	lcp1	lymphocyte cytosolic protein 1 (L-plastin)
ENSDARG00000023228	913.947	1.19981	0.0928118	12.9273	3.15553e-38	3.25553e-36	4242	4130	2139	1934	2924.4	2924.21	1308.58	1237.33	vsnl1a	visinin-like 1a
ENSDARG00000023362	16.2449	-1.24965	0.548218	-2.27947	0.0226393	0.0793377	11	19	45	35	7.5833	13.4528	27.5298	22.3921	nr5a1b	nuclear receptor subfamily 5, group A, member 1b
ENSDARG00000023587	37.1857	-1.52733	0.453803	-3.36561	0.000763749	0.00462057	35	29	108	98	24.1287	20.5332	66.0715	62.698	kcnk5a	potassium channel, subfamily K, member 5a
ENSDARG00000024116	806.763	-1.05975	0.125233	-8.46224	2.62285e-17	9.80972e-16	256	233	542	595	176.484	164.974	331.581	380.666	vamp8	vesicle-associated membrane protein 8 (endobrevin)
ENSDARG00000024492	62.6646	-1.36752	0.311113	-4.39558	1.10476e-05	0.000105515	67	60	138	226	46.1892	42.4825	84.4246	144.589	col9a2	procollagen, type IX, alpha 2
ENSDARG00000024540	1701.82	-1.87186	0.0853153	-21.9406	1.06598e-106	7.11409e-104	1600	1556	6532	6367	1103.03	1101.71	3996.1	4073.45	tspan36	tetraspanin 36
ENSDARG00000025254	4396.24	-1.08678	0.0881177	-12.3332	5.99911e-35	5.61916e-33	1123	1092	2643	2610	774.186	773.182	1616.92	1669.81	s100a10b	S100 calcium binding protein A10b
ENSDARG00000025403	48.1302	-2.5438	0.400868	-6.34573	2.21373e-10	4.36935e-09	11	13	68	88	7.5833	9.20454	41.6005	56.3002	ftr83	finTRIM family, member 83
ENSDARG00000025504	15.5159	-3.81782	0.622681	-6.13127	8.71828e-10	1.61902e-08	4	13	119	149	2.75756	9.20454	72.801	95.3265	gucy2f	guanylate cyclase 2F, retinal
ENSDARG00000025608	3.76623	2.67621	1.22474	2.18512	0.02888	0.0959642	11	12	1	3	7.5833	8.4965	0.611773	1.91933	casp6l1	caspase 6, apoptosis-related cysteine peptidase, like 1
ENSDARG00000025903	3331.27	-1.38599	0.0525505	-26.3745	2.68976e-153	5.22205e-150	3449	3442	10355	9766	2377.71	2437.08	6334.91	6248.05	lgals9l1	lectin, galactoside-binding, soluble, 9 (galectin 9)-like 1
ENSDARG00000026017	77.7013	-1.35066	0.263623	-5.12346	2.99982e-07	3.79977e-06	58	55	169	153	39.9847	38.9423	103.39	97.8856	xpnpep2	X-prolyl aminopeptidase (aminopeptidase P) 2, membrane-bound
ENSDARG00000026165	59.7273	-1.14425	0.324193	-3.52953	0.000416303	0.00269656	53	33	110	102	36.5377	23.3654	67.295	65.2571	col11a1a	collagen, type XI, alpha 1a
ENSDARG00000026248	15.1158	-2.17881	0.518089	-4.20548	2.60529e-05	0.000228683	21	12	97	70	14.4772	8.4965	59.342	44.7843	slc1a7b	solute carrier family 1 (glutamate transporter), member 7b
ENSDARG00000026329	51.0695	-1.24635	0.310065	-4.01962	5.82909e-05	0.000470646	60	89	212	184	41.3635	63.0157	129.696	117.719	arhgap29a	Rho GTPase activating protein 29a
ENSDARG00000026417	165.935	-2.46704	0.185558	-13.2952	2.46744e-40	2.75889e-38	159	177	1055	1021	109.613	125.323	645.42	653.211	ccr12b.2	chemokine (C-C motif) receptor 12b, tandem duplicate 2
ENSDARG00000026599	135.342	1.12223	0.1917	5.85407	4.79694e-09	7.92906e-08	344	328	184	161	237.15	232.238	112.566	103.004	eng2a	engrailed homeobox 2a
ENSDARG00000026726	345.563	-1.2079	0.135615	-8.9068	5.25246e-19	2.22563e-17	263	283	767	644	181.31	200.376	469.23	412.015	anxa1a	annexin A1a
ENSDARG00000026736	117.634	-1.12895	0.239005	-4.72356	2.31752e-06	2.50724e-05	112	76	220	238	77.2118	53.8112	134.59	152.267	il11ra	interleukin 11 receptor, alpha
ENSDARG00000026787	14.9869	-1.42738	0.563432	-2.53338	0.011297	0.0451287	16	13	43	44	11.0303	9.20454	26.3062	28.1501	aqp7	aquaporin 7
ENSDARG00000026820	51.4052	-1.89079	0.297469	-6.35625	2.06742e-10	4.09572e-09	59	79	332	242	40.6741	55.9353	203.109	154.826	gc3	guanylyl cyclase 3
ENSDARG00000026840	9.57685	-1.9977	0.768249	-2.60033	0.00931335	0.0384784	16	4	27	61	11.0303	2.83217	16.5179	39.0263	arhgap23b	Rho GTPase activating protein 23b
ENSDARG00000026925	28.669	1.87997	0.432055	4.35122	1.3538e-05	0.000126973	62	60	18	19	42.7422	42.4825	11.0119	12.1557	nos2a	nitric oxide synthase 2a, inducible
ENSDARG00000026972	31.6375	1.74612	0.519438	3.36155	0.000775056	0.00467441	23	31	9	9	15.856	21.9493	5.50595	5.75798	si:ch211-119o8.6	si:ch211-119o8.6
ENSDARG00000027112	118.592	-1.37583	0.251466	-5.47125	4.46878e-08	6.53075e-07	87	50	222	175	59.977	35.4021	135.814	111.961	ephb4b	eph receptor B4b
ENSDARG00000027161	3.50076	-3.15632	1.35195	-2.33464	0.0195623	0.0703438	1	2	17	13	0.689391	1.41608	10.4001	8.31708
ENSDARG00000027199	508.184	-1.47255	0.164422	-8.95593	3.36892e-19	1.44762e-17	112	118	362	351	77.2118	83.5489	221.462	224.561	smad1	SMAD family member 1
ENSDARG00000027345	273.16	-1.94541	0.136385	-14.2641	3.66388e-46	5.11411e-44	275	266	1210	1118	189.583	188.339	740.245	715.269	mpzl2b	myelin protein zero-like 2b
ENSDARG00000027424	29.2044	-2.8747	0.535194	-5.37133	7.81559e-08	1.10171e-06	29	29	238	237	19.9923	20.5332	145.602	151.627	slc25a3a	solute carrier family 25 (mitochondrial carrier; phosphate carrier), member 3a
ENSDARG00000027495	61.7079	-1.76742	0.25057	-7.05358	1.74372e-12	4.3402e-11	92	95	357	354	63.424	67.264	218.403	226.48	elovl4b	ELOVL fatty acid elongase 4b
ENSDARG00000027529	1822.7	-2.36379	0.0864313	-27.3488	1.11676e-164	2.64994e-161	2036	1828	11071	11121	1403.6	1294.3	6772.94	7114.94	hmox1a	heme oxygenase 1a
ENSDARG00000027799	25.8161	-3.07698	0.475817	-6.46674	1.00139e-10	2.04648e-09	40	17	292	244	27.5756	12.0367	178.638	156.105	ucmaa	upper zone of growth plate and cartilage matrix associated a
ENSDARG00000027867	62.1308	-1.66995	0.34007	-4.91062	9.07871e-07	1.0618e-05	23	26	82	92	15.856	18.4091	50.1654	58.8593	paplna	papilin a, proteoglycan-like sulfated glycoprotein
ENSDARG00000028048	915.208	-2.05485	0.126452	-16.2501	2.23081e-59	4.45245e-57	136	133	659	590	93.7572	94.1696	403.158	377.467	rdh8a	retinol dehydrogenase 8a
ENSDARG00000028053	954.586	-1.21245	0.118236	-10.2545	1.12956e-24	6.87261e-23	314	281	742	796	216.469	198.96	453.935	509.261	bmp1b	bone morphogenetic protein 1b
ENSDARG00000028088	101.381	-1.1013	0.245463	-4.48664	7.23563e-06	7.14397e-05	87	61	175	179	59.977	43.1905	107.06	114.52	galk1	galactokinase 1
ENSDARG00000028346	43.6285	-1.22274	0.522366	-2.34076	0.0192444	0.0695051	8	7	15	24	5.51513	4.95629	9.17659	15.3546	tesca	tescalcin a
ENSDARG00000028396	2411.87	-1.34933	0.0773598	-17.4423	3.93973e-68	9.67091e-66	1806	1782	5302	4913	1245.04	1261.73	3243.62	3143.22	fkbp5	FK506 binding protein 5
ENSDARG00000028485	27.296	-2.2835	0.408854	-5.58512	2.33536e-08	3.5447e-07	33	33	185	174	22.7499	23.3654	113.178	111.321	cabp5b	calcium binding protein 5b
ENSDARG00000028618	3751.42	-1.43096	0.0593182	-24.1234	1.41982e-128	1.68454e-125	3761	3506	11686	10214	2592.8	2482.39	7149.18	6534.67	zgc:77517	zgc:77517
ENSDARG00000028625	14.7757	1.53076	0.550642	2.77995	0.00543674	0.0247483	41	42	13	19	28.265	29.7378	7.95305	12.1557	jph2	junctophilin 2
ENSDARG00000028663	67.9811	-1.29972	0.258475	-5.02842	4.94532e-07	6.05922e-06	96	114	270	307	66.1815	80.7168	165.179	196.411	tek	TEK tyrosine kinase, endothelial
ENSDARG00000028780	20.823	1.39172	0.437957	3.17774	0.00148426	0.00821403	65	76	28	32	44.8104	53.8112	17.1296	20.4728	gzma	granzyme A
ENSDARG00000028912	24.0026	-2.23802	0.430559	-5.19793	2.01517e-07	2.6353e-06	17	21	92	108	11.7196	14.8689	56.2831	69.0957
ENSDARG00000029036	173.823	-1.36681	0.174634	-7.8267	5.00844e-15	1.57063e-13	182	174	460	563	125.469	123.199	281.415	360.194	rab32a	RAB32a, member RAS oncogene family
ENSDARG00000029263	34.8223	2.35845	0.528403	4.46335	8.0687e-06	7.88989e-05	30	39	4	11	20.6817	27.6136	2.44709	7.03753	hoxb3a	homeobox B3a
ENSDARG00000029432	94.3095	-1.26613	0.263626	-4.80273	1.56517e-06	1.74912e-05	277	294	839	698	190.961	208.164	513.277	446.563	tph1a	tryptophan hydroxylase 1 (tryptophan 5-monooxygenase) a
ENSDARG00000029689	99.2625	1.17093	0.201406	5.81376	6.10856e-09	9.96596e-08	395	411	205	195	272.309	291.005	125.413	124.756	tkta	transketolase a
ENSDARG00000029751	224.602	-1.23091	0.167201	-7.36182	1.81417e-13	4.94807e-12	127	170	412	368	87.5527	120.367	252.05	235.437	wbp1lb	WW domain binding protein 1-like b
ENSDARG00000029795	109.517	1.38198	0.23657	5.84172	5.16648e-09	8.48733e-08	174	218	78	90	119.954	154.353	47.7183	57.5798	fam213b	family with sequence similarity 213, member B
ENSDARG00000029838	38.9948	-1.09675	0.345313	-3.17611	0.00149266	0.00825357	57	40	108	123	39.2953	28.3217	66.0715	78.6924
ENSDARG00000029898	49.3073	-3.1584	0.336359	-9.38996	6.00232e-21	2.94003e-19	55	60	576	571	37.9165	42.4825	352.381	365.312	si:dkey-22i16.2	si:dkey-22i16.2
ENSDARG00000029930	11.1124	-4.6586	1.19023	-3.91402	9.07708e-05	0.000703119	2	0	20	36	1.37878	0	12.2355	23.0319	spdef	SAM pointed domain containing ETS transcription factor
ENSDARG00000029955	482.831	-1.61178	0.131679	-12.2403	1.89425e-34	1.74369e-32	239	179	740	686	164.764	126.739	452.712	438.886	glb1l	galactosidase, beta 1-like
ENSDARG00000030092	483.158	-1.11761	0.190318	-5.87236	4.29637e-09	7.16823e-08	62	53	161	118	42.7422	37.5262	98.4954	75.4935	tram2	translocation associated membrane protein 2
ENSDARG00000030125	245.57	-1.29879	0.173244	-7.49686	6.5367e-14	1.86628e-12	477	437	1291	1220	328.839	309.414	789.799	780.526	sox7	SRY (sex determining region Y)-box 7
ENSDARG00000030307	79.3893	-2.39258	0.331515	-7.21713	5.30978e-13	1.38965e-11	34	47	250	226	23.4393	33.278	152.943	144.589	hspa12b	heat shock protein 12B
ENSDARG00000030490	12.1772	-1.53923	0.591965	-2.6002	0.00931692	0.0384784	23	22	73	73	15.856	15.5769	44.6594	46.7036	sptb	spectrin, beta, erythrocytic
ENSDARG00000030758	10.1979	-3.14705	0.758287	-4.15021	3.32167e-05	0.000284319	8	4	49	69	5.51513	2.83217	29.9769	44.1445	guca1c	guanylate cyclase activator 1C
ENSDARG00000030759	27.8549	-1.18998	0.533247	-2.23157	0.0256435	0.0873573	10	21	34	45	6.89391	14.8689	20.8003	28.7899	melk	maternal embryonic leucine zipper kinase
ENSDARG00000030881	196.672	-1.09298	0.170317	-6.41734	1.38675e-10	2.79654e-09	219	248	557	556	150.977	175.594	340.757	355.715	baxb	bcl2-associated X protein, b
ENSDARG00000030938	261.26	-1.14244	0.15348	-7.44353	9.8027e-14	2.74733e-12	466	442	1157	1082	321.256	312.954	707.821	692.237	fermt3b	fermitin family member 3b
ENSDARG00000030975	25.0951	-1.66739	0.601019	-2.77428	0.00553243	0.0250646	4	10	33	17	2.75756	7.08042	20.1885	10.8762	ccdc80l1	coiled-coil domain containing 80 like 1
ENSDARG00000031136	69.1169	-1.81457	0.293719	-6.17792	6.49527e-10	1.21253e-08	62	40	202	198	42.7422	28.3217	123.578	126.676	moxd1	monooxygenase, DBH-like 1
ENSDARG00000031161	116.178	-1.4997	0.198006	-7.57404	3.6179e-14	1.05408e-12	224	226	737	685	154.424	160.017	450.876	438.246	nr1d4a	nuclear receptor subfamily 1, group D, member 4a
ENSDARG00000031228	631.108	-2.11144	0.121524	-17.3747	1.28228e-67	3.11187e-65	189	205	937	964	130.295	145.149	573.231	616.743	podxl	podocalyxin-like
ENSDARG00000031534	12.0769	-1.53566	0.704708	-2.17914	0.0293209	0.097112	8	11	42	20	5.51513	7.78846	25.6945	12.7955
ENSDARG00000031715	77.0679	-1.14219	0.257279	-4.43951	9.01636e-06	8.74051e-05	125	120	336	269	86.1739	84.965	205.556	172.1	lyn	LYN proto-oncogene, Src family tyrosine kinase
ENSDARG00000031745	15678.3	-1.23264	0.0631263	-19.5265	6.53237e-85	2.49116e-82	18136	17835	48930	45519	12502.8	12627.9	29934	29121.9	si:busm1-266f07.2	si:busm1-266f07.2
ENSDARG00000031761	21.6144	-1.54903	0.592246	-2.61552	0.00890908	0.0371328	7	7	32	14	4.82574	4.95629	19.5767	8.95686	dab2	Dab, mitogen-responsive phosphoprotein, homolog 2 (Drosophila)
ENSDARG00000031776	17027.6	-1.02449	0.0628052	-16.3122	8.07761e-60	1.64291e-57	31373	30252	69383	70531	21628.3	21419.7	42446.6	45124	zgc:92066	zgc:92066
ENSDARG00000031848	87.6463	-1.07432	0.261831	-4.1031	4.07643e-05	0.000342607	110	127	288	270	75.833	89.9213	176.191	172.739	pparg	peroxisome proliferator-activated receptor gamma
ENSDARG00000031876	166.15	1.17728	0.176682	6.66324	2.67849e-11	5.88495e-10	636	547	332	253	438.453	387.299	203.109	161.863	pard6ga	par-6 family cell polarity regulator gamma a
ENSDARG00000031952	619.377	-1.2002	0.119264	-10.0634	8.01917e-24	4.6161e-22	1184	1175	3125	2931	816.239	831.949	1911.79	1875.18	mb	myoglobin
ENSDARG00000031983	13.4701	-1.27956	0.549161	-2.33002	0.019805	0.0710611	14	10	33	32	9.65147	7.08042	20.1885	20.4728	six4b	SIX homeobox 4b
ENSDARG00000032005	138.604	-1.24288	0.31621	-3.93057	8.47459e-05	0.000661247	23	22	63	56	15.856	15.5769	38.5417	35.8274	ccdc65	coiled-coil domain containing 65
ENSDARG00000032010	142.774	-1.09164	0.350815	-3.11173	0.00185996	0.0100155	18	11	35	34	12.409	7.78846	21.412	21.7524	slc15a2	solute carrier family 15 (oligopeptide transporter), member 2
ENSDARG00000032469	130.39	-1.54803	0.211591	-7.31611	2.55266e-13	6.85717e-12	132	103	424	344	90.9996	72.9283	259.392	220.083	ampd3b	adenosine monophosphate deaminase 3b
ENSDARG00000032630	8.40422	1.82408	0.766679	2.3792	0.0173502	0.0639831	50	27	6	18	34.4695	19.1171	3.67064	11.516	neb	nebulin
ENSDARG00000032631	132.929	-2.13845	0.199751	-10.7056	9.58241e-27	6.39506e-25	129	128	698	568	88.9314	90.6294	427.017	363.392	ltb4r	leukotriene B4 receptor
ENSDARG00000032838	6.25724	-3.55103	0.964877	-3.68029	0.000232966	0.00162749	7	3	55	75	4.82574	2.12413	33.6475	47.9832	si:dkey-206f10.1	si:dkey-206f10.1
ENSDARG00000032885	58.4238	-1.19006	0.465056	-2.55895	0.0104988	0.0424483	7	13	25	26	4.82574	9.20454	15.2943	16.6342	si:ch211-226m7.4	si:ch211-226m7.4
ENSDARG00000032963	225.399	1.02136	0.32127	3.17914	0.00147715	0.00818526	34	35	24	14	23.4393	24.7815	14.6825	8.95686	her12	hairy-related 12
ENSDARG00000033104	11.8016	-1.48121	0.670173	-2.2102	0.0270915	0.0912135	21	17	51	67	14.4772	12.0367	31.2004	42.8649	tmc2a	transmembrane channel-like 2a
ENSDARG00000033285	319.154	-1.25493	0.163186	-7.69017	1.46943e-14	4.46388e-13	193	174	501	477	133.052	123.199	306.498	305.173	gsto2	glutathione S-transferase omega 2
ENSDARG00000033307	939.225	-1.37684	0.110025	-12.5139	6.27011e-36	6.14241e-34	340	289	973	852	234.393	204.624	595.255	545.089	igf2b	insulin-like growth factor 2b
ENSDARG00000033355	148.484	1.69583	0.21157	8.01545	1.09732e-15	3.67311e-14	223	175	66	71	153.734	123.907	40.377	45.4241	zgc:101699	zgc:101699
ENSDARG00000033587	115.356	-1.5055	0.197526	-7.62177	2.5022e-14	7.39101e-13	120	125	420	358	82.7269	88.5052	256.945	229.04	LOC101884755	trans-2-enoyl-CoA reductase, mitochondrial-like
ENSDARG00000033666	46.9365	-1.35453	0.345318	-3.92255	8.76156e-05	0.000680902	90	88	250	258	62.0452	62.3077	152.943	165.062	pi4k2a	phosphatidylinositol 4-kinase type 2 alpha
ENSDARG00000033735	1087.44	-1.23197	0.0886021	-13.9045	5.94764e-44	7.38476e-42	1252	1226	3242	3256	863.117	868.059	1983.37	2083.11	ncf1	neutrophil cytosolic factor 1
ENSDARG00000033999	19.4598	1.19221	0.495744	2.40489	0.0161774	0.0603785	45	55	27	22	31.0226	38.9423	16.5179	14.0751	cyp26a1	cytochrome P450, family 26, subfamily A, polypeptide 1
ENSDARG00000034007	883.059	-1.10711	0.138295	-8.00543	1.19046e-15	3.97863e-14	133	151	366	318	91.689	106.914	223.909	203.449	prom1b	prominin 1 b
ENSDARG00000034092	41.1881	-2.01269	0.336008	-5.99	2.09841e-09	3.6823e-08	40	29	168	143	27.5756	20.5332	102.778	91.4879	sc:d0284	sc:d0284
ENSDARG00000034222	77.5569	-1.1961	0.291732	-4.1	4.13148e-05	0.000346415	48	34	119	91	33.0908	24.0734	72.801	58.2196	hs1bp3	HCLS1 binding protein 3
ENSDARG00000034368	1570.84	-1.04657	0.0893074	-11.7187	1.02175e-31	8.32846e-30	1158	1211	2905	2567	798.315	857.439	1777.2	1642.3	hexb	hexosaminidase B (beta polypeptide)
ENSDARG00000034424	138.287	-2.04767	0.196635	-10.4136	2.15029e-25	1.35863e-23	185	207	891	919	127.537	146.565	545.089	587.954	atp1b2b	ATPase, Na+/K+ transporting, beta 2b polypeptide
ENSDARG00000034541	87.2403	-1.0344	0.288624	-3.58391	0.000338495	0.00225621	62	65	187	105	42.7422	46.0227	114.401	67.1764	tgfbr2b	transforming growth factor beta receptor 2b
ENSDARG00000034650	369.056	-1.16814	0.136653	-8.54827	1.24951e-17	4.77364e-16	333	275	781	744	229.567	194.711	477.794	475.993	fabp7b	fatty acid binding protein 7, brain, b
ENSDARG00000034852	14.4657	-1.84967	0.528741	-3.49824	0.000468333	0.00299184	13	14	63	46	8.96208	9.91259	38.5417	29.4297	nt5c2l1	5'-nucleotidase, cytosolic II, like 1
ENSDARG00000035005	235.977	-1.24876	0.322234	-3.87534	0.000106477	0.000809516	15	17	49	36	10.3409	12.0367	29.9769	23.0319	bag2	BCL2-associated athanogene 2
ENSDARG00000035101	9.00669	-2.93644	0.827859	-3.54703	0.000389602	0.00255147	3	5	48	21	2.06817	3.54021	29.3651	13.4353	dicp2.1	diverse immunoglobulin domain-containing protein 2.1
ENSDARG00000035163	9.14119	-2.19002	0.733803	-2.98448	0.00284061	0.0143414	7	18	66	62	4.82574	12.7448	40.377	39.6661	tmem136b	transmembrane protein 136b
ENSDARG00000035257	4.04202	-2.40997	1.0696	-2.25314	0.0242504	0.08372	1	5	24	12	0.689391	3.54021	14.6825	7.6773	akr1a1a	aldo-keto reductase family 1, member A1a (aldehyde reductase)
ENSDARG00000035290	6.65847	-6.08012	1.63889	-3.7099	0.000207339	0.00147108	0	0	20	8	0	0	12.2355	5.1182	dmrt3a	doublesex and mab-3 related transcription factor 3a
ENSDARG00000035309	15.9681	2.04401	0.651014	3.13973	0.00169101	0.00920788	40	23	8	9	27.5756	16.285	4.89418	5.75798	entpd3	ectonucleoside triphosphate diphosphohydrolase 3
ENSDARG00000035350	19.6944	-1.69511	0.594637	-2.85066	0.00436284	0.0206089	8	5	25	22	5.51513	3.54021	15.2943	14.0751	ins	preproinsulin
ENSDARG00000035435	147.834	-2.43719	0.199316	-12.2278	2.20897e-34	2.02467e-32	84	88	487	552	57.9088	62.3077	297.933	353.156	m17	IL-6 subfamily cytokine M17
ENSDARG00000035506	87.1521	-1.18352	0.236607	-5.00204	5.6727e-07	6.86304e-06	118	100	291	262	81.3481	70.8042	178.026	167.621	entpd2a.1	ectonucleoside triphosphate diphosphohydrolase 2a, tandem duplicate 1
ENSDARG00000035508	463.43	1.01611	0.118303	8.58905	8.76892e-18	3.38031e-16	1836	1767	973	1015	1265.72	1251.11	595.255	649.372	barhl1a	BarH-like homeobox 1a
ENSDARG00000035521	244.786	-1.07578	0.201655	-5.33473	9.56872e-08	1.32867e-06	59	93	206	153	40.6741	65.8479	126.025	97.8856	sfrp1a	secreted frizzled-related protein 1a
ENSDARG00000035552	36.5354	-1.67512	0.353579	-4.73761	2.16248e-06	2.35743e-05	43	71	217	191	29.6438	50.271	132.755	122.197	agtr2	angiotensin II receptor, type 2
ENSDARG00000035560	4.11277	-6.53158	1.70244	-3.83661	0.000124746	0.000932148	0	0	19	19	0	0	11.6237	12.1557	capga	capping protein (actin filament), gelsolin-like a
ENSDARG00000035632	52.0947	2.72777	0.306783	8.89152	6.02775e-19	2.54908e-17	197	194	37	29	135.81	137.36	22.6356	18.5535	ccl19a.2	chemokine (C-C motif) ligand 19a, tandem duplicate 2
ENSDARG00000035682	731.345	-1.0789	0.150092	-7.18823	6.56381e-13	1.70117e-11	187	148	409	381	128.916	104.79	250.215	243.754	ltbp3	latent transforming growth factor beta binding protein 3
ENSDARG00000035694	13994	-1.42692	0.0831906	-17.1524	6.02749e-66	1.39916e-63	437	399	1378	1135	301.264	282.509	843.023	726.145	stm	starmaker
ENSDARG00000035732	210.107	1.1395	0.142784	7.98058	1.45648e-15	4.8075e-14	469	436	245	214	323.324	308.706	149.884	136.912	arntl1b	aryl hydrocarbon receptor nuclear translocator-like 1b
ENSDARG00000035798	180.093	-3.14488	0.18449	-17.0463	3.72476e-65	8.46233e-63	196	205	1979	1982	135.121	145.149	1210.7	1268.03	gngt1	guanine nucleotide binding protein (G protein), gamma transducing activity polypeptide 1
ENSDARG00000035809	95.3861	-2.3043	0.25716	-8.96056	3.2304e-19	1.39653e-17	123	104	581	668	84.7951	73.6363	355.44	427.37	col1a1b	collagen, type I, alpha 1b
ENSDARG00000035810	618.088	-1.13529	0.104454	-10.8688	1.62259e-27	1.11064e-25	1086	1102	2784	2587	748.679	780.262	1703.18	1655.1	rgcc	regulator of cell cycle
ENSDARG00000035858	2309.72	-1.05561	0.0724048	-14.5793	3.8037e-48	5.52598e-46	1067	1086	2515	2483	735.58	768.933	1538.61	1588.56	cnn2	calponin 2
ENSDARG00000035891	59.4612	-1.0274	0.381929	-2.69004	0.00714442	0.0309172	20	24	43	57	13.7878	16.993	26.3062	36.4672	acana	aggrecan a
ENSDARG00000036074	1863.81	-1.11466	0.0752309	-14.8165	1.14536e-49	1.72256e-47	3574	3355	8492	8260	2463.88	2375.48	5195.17	5284.54	cebpa	CCAAT/enhancer binding protein (C/EBP), alpha
ENSDARG00000036107	1025.34	-1.19101	0.0822687	-14.4771	1.69039e-47	2.43919e-45	1146	1175	2942	2975	790.042	831.949	1799.84	1903.33	txnipa	thioredoxin interacting protein a
ENSDARG00000036426	36.9633	-1.2639	0.439784	-2.87392	0.00405412	0.0193648	17	8	36	31	11.7196	5.66433	22.0238	19.833	zgc:103586	zgc:103586
ENSDARG00000036427	3959.62	-1.57689	0.0702235	-22.4552	1.13719e-111	8.67349e-109	1078	993	3392	3502	743.163	703.086	2075.13	2240.49	slc3a2a	solute carrier family 3 (amino acid transporter heavy chain), member 2a
ENSDARG00000036456	600.083	-1.24275	0.112354	-11.0611	1.93795e-28	1.42714e-26	369	326	987	851	254.385	230.822	603.82	544.449	anxa4	annexin A4
ENSDARG00000036462	147.929	-1.10493	0.181606	-6.08421	1.17067e-09	2.12411e-08	153	177	395	398	105.477	125.323	241.65	254.631
ENSDARG00000036567	18.935	-1.3275	0.508267	-2.61181	0.00900647	0.0374425	19	17	55	46	13.0984	12.0367	33.6475	29.4297	aanat1	arylalkylamine N-acetyltransferase 1
ENSDARG00000036628	4162.8	-1.13764	0.0760887	-14.9515	1.52243e-50	2.39066e-48	6616	6235	15593	15958	4561.01	4414.64	9539.37	10209.5	cd74b	CD74 molecule, major histocompatibility complex, class II invariant chain b
ENSDARG00000036670	563.133	-1.2861	0.130065	-9.88817	4.68496e-23	2.55887e-21	600	479	1502	1434	413.635	339.152	918.883	917.438	aplnrb	apelin receptor b
ENSDARG00000036773	79.0118	-1.21099	0.288379	-4.19932	2.67722e-05	0.000234226	79	124	265	261	54.4619	87.7972	162.12	166.981	s100s	S100 calcium binding protein S
ENSDARG00000036776	74.612	-1.5507	0.267466	-5.79776	6.72047e-09	1.09142e-07	57	91	240	245	39.2953	64.4318	146.825	156.745	aldh8a1	aldehyde dehydrogenase 8 family, member A1
ENSDARG00000036830	885.434	1.63135	0.0910835	17.9105	9.77076e-72	2.70993e-69	2467	2209	799	884	1700.73	1564.06	488.806	565.561	krt91	keratin 91
ENSDARG00000036865	184.701	-1.11033	0.186759	-5.94525	2.76041e-09	4.76567e-08	127	120	318	278	87.5527	84.965	194.544	177.858	slc2a12	solute carrier family 2 (facilitated glucose transporter), member 12
ENSDARG00000036893	162.859	-2.46497	0.236677	-10.4149	2.11914e-25	1.34292e-23	100	98	623	598	68.9391	69.3881	381.134	382.586	f13a1b	coagulation factor XIII, A1 polypeptide b
ENSDARG00000036912	14.8493	-1.34703	0.496697	-2.71197	0.00668847	0.0292943	25	19	67	58	17.2348	13.4528	40.9888	37.107	edn1	endothelin 1
[truncated: 1,302 more rows]
