# Supplementary material for: Neuron-glia interaction through Serotonin-BDNF-NGFR axis enables regenerative neurogenesis in Alzheimer’s model of adult zebrafish brain
Source: PLoS Biol. 2020 Jan 6;18(1):e3000585. doi: 10.1371/journal.pbio.3000585 (PMC6964913; doi:10.1371/journal.pbio.3000585)
Supplement: S2 Data — GO, gene ontology; IL4, interleukin-4; KEGG, Kyoto Encyclopedia of Genes and Genomes. (XLSX) [file pbio.3000585.s012.xlsx]

## Sheet: dre04744
geneIds

## Sheet: dre00830
geneIds

## Sheet: dre04512
geneIds

## Sheet: dre04145
geneIds

## Sheet: dre04060
geneIds

## Sheet: dre00860
geneIds

## Sheet: dre00590
geneIds

## Sheet: dre00982
geneIds

## Sheet: dre00380
geneIds

## Sheet: dre04514
geneIds

[truncated: 16 more sheets: dre04142, dre04672, dre00140, dre04510, dre00052, dre00514, dre00053, dre00980, dre00500, dre04620, dre00040, dre00983, dre00520, dre00531, dre04614, dre04621]
